# Supplementary material for: Unraveling Genetic Modifiers in the Gria4 Mouse Model of Absence Epilepsy
Source: PLoS Genet. 2014 Jul 10;10(7):e1004454. doi: 10.1371/journal.pgen.1004454 (PMC4091709; doi:10.1371/journal.pgen.1004454)
Supplement: File S1 — A MS Excel workbook pertaining to the G4swdm1 modifier interval on Chr 15, with five worksheets it in including: 1. List of all genes in the G4swdm1 critical interval (JAX-MGI). 2. List of all sequence variants between B6J and HeJ in the interval (Sanger-MGP). 3. List of possibly functional/deleterious variants in the interval (Sanger-MGP). 4. RNAseq results from B6J and FeJ thalamus and somatosensory cortex for Chr 15. 5. Subset of RNAseq results for genes in the G4swdm1 critical interval. (XLSX) [file pgen.1004454.s001.xlsx]

## Sheet: all genes SWDlen CI
Genetic Chr	cM	start	end	strand GRCm38	MGI ID	Feature Type	Symbol	Name
15	48.52	94522688	94543547	-	MGI:1926145	protein coding gene	Pus7l	pseudouridylate synthase 7 homolog (S. cerevisiae)-like
15	48.55	94543643	94581815	+	MGI:2182474	protein coding gene	Irak4	interleukin-1 receptor-associated kinase 4
15	48.59	94577951	94589889	-	MGI:1100520	protein coding gene	Twf1	twinfilin, actin-binding protein, homolog 1 (Drosophila)
15	48.65	94629185	95096097	+	MGI:2444580	protein coding gene	Tmem117	transmembrane protein 117
15	49.39	95219451	95528706	-	MGI:1858510	protein coding gene	Nell2	NEL-like 2
15	50.47	95623563	95655960	-	MGI:107445	protein coding gene	Dbx2	developing brain homeobox 2
15	50.66	95790843	95975464	+	MGI:2145890	protein coding gene	Ano6	anoctamin 6
15	52.37	96287518	96404992	+	MGI:1924294	protein coding gene	Arid2	AT rich interactive domain 2 (ARID, RFX-like)
15	52.44	96411698	96460843	-	MGI:1919443	protein coding gene	Scaf11	SR-related CTD-associated factor 11
15	52.53	96571418	96642913	-	MGI:2145895	protein coding gene	Slc38a1	solute carrier family 38, member 1
15	52.6	96687394	96699698	-	MGI:1915010	protein coding gene	Slc38a2	solute carrier family 38, member 2
15	52.77	96994823	97055956	-	MGI:1916604	protein coding gene	Slc38a4	solute carrier family 38, member 4
15	52.91	97244074	97247287	-	MGI:2145995	protein coding gene	Amigo2	adhesion molecule with Ig like domain 2
15	52.91	97247107	97385689	+	MGI:2446270	protein coding gene	Pced1b	PC-esterase domain containing 1B
15	53.54	97675105	97705822	-	MGI:1277218	protein coding gene	Rpap3	RNA polymerase II associated protein 3
15	53.7	97711019	97731405	-	MGI:97746	protein coding gene	Endou	endonuclease, polyU-specific
15	53.74	97744770	97767972	-	MGI:2441741	protein coding gene	Rapgef3	Rap guanine nucleotide exchange factor (GEF) 3
15	53.78	97784355	97792692	+	MGI:1914989	protein coding gene	Slc48a1	solute carrier family 48 (heme transporter), member 1
15	53.79	97792664	97844502	-	MGI:1891835	protein coding gene	Hdac7	histone deacetylase 7
15	53.85	97854425	97910630	-	MGI:103076	protein coding gene	Vdr	vitamin D receptor
15	53.96	97964229	97970286	+	MGI:1196384	protein coding gene	Tmem106c	transmembrane protein 106C
15	53.97	97975602	98004695	-	MGI:88452	protein coding gene	Col2a1	collagen, type II, alpha 1
15	54.04	98038744	98093744	-	MGI:2445054	protein coding gene	Senp1	SUMO1/sentrin specific peptidase 1
15	54.09	98092589	98132447	+	MGI:97548	protein coding gene	Pfkm	phosphofructokinase, muscle
15	54.13	98134637	98165625	-	MGI:1925791	protein coding gene	Asb8	ankyrin repeat and SOCS box-containing 8
15	54.17	98167806	98170134	+	MGI:2146066	protein coding gene	AI836003	expressed sequence AI836003
15	54.19	98186015	98195542	-	MGI:3030122	protein coding gene	Olfr288	olfactory receptor 288
15	54.21	98207637	98221056	-	MGI:3030121	protein coding gene	Olfr287	olfactory receptor 287
15	54.23	98226675	98227643	-	MGI:3030120	protein coding gene	Olfr286	olfactory receptor 286
15	54.26	98255982	98257307	-	MGI:1917319	protein coding gene	H1fnt	H1 histone family, member N, testis-specific
15	54.29	98286122	98296083	-	MGI:2442788	protein coding gene	Zfp641	zinc finger protein 641
15	54.31	98312589	98313548	-	MGI:3030119	protein coding gene	Olfr285	olfactory receptor 285
15	54.34	98340022	98340939	-	MGI:3030118	protein coding gene	Olfr284	olfactory receptor 284
15	54.38	98378179	98379108	-	MGI:3030117	protein coding gene	Olfr283	olfactory receptor 283
15	54.44	98437470	98438397	+	MGI:3030116	protein coding gene	Olfr282	olfactory receptor 282
15	54.46	98456312	98457247	+	MGI:3030115	protein coding gene	Olfr281	olfactory receptor 281
15	54.48	98480400	98482683	-	MGI:96742	protein coding gene	Lalba	lactalbumin, alpha
15	54.5	98497474	98498406	+	MGI:3030113	protein coding gene	Olfr279	olfactory receptor 279
15	54.52	98519101	98534221	-	MGI:1916862	protein coding gene	Kansl2	KAT8 regulatory NSL complex subunit 2
15	54.54	98538689	98570923	-	MGI:1328363	protein coding gene	Ccnt1	cyclin T1
15	54.57	98571004	98589588	+	MGI:1921113	protein coding gene	4930415O20Rik	RIKEN cDNA 4930415O20 gene
15	54.59	98589994	98607633	-	MGI:87917	protein coding gene	Adcy6	adenylate cyclase 6
15	54.64	98632220	98644530	+	MGI:103307	protein coding gene	Cacnb3	calcium channel, voltage-dependent, beta 3 subunit
15	54.65	98645134	98662889	-	MGI:1921601	protein coding gene	Ddx23	DEAD (Asp-Glu-Ala-Asp) box polypeptide 23
15	54.65	98663421	98677461	-	MGI:2444878	protein coding gene	Rnd1	Rho family GTPase 1
15	54.65	98708227	98723336	+	MGI:2146001	protein coding gene	Ccdc65	coiled-coil domain containing 65
15	54.65	98724373	98728198	-	MGI:1913370	protein coding gene	Fkbp11	FK506 binding protein 11
15	54.65	98737621	98763214	-	MGI:99432	protein coding gene	Arf3	ADP-ribosylation factor 3
15	54.65	98771753	98778150	-	MGI:108061	protein coding gene	Wnt10b	wingless related MMTV integration site 10b
15	54.65	98789857	98793837	+	MGI:98953	protein coding gene	Wnt1	wingless-related MMTV integration site 1
15	54.69	98803782	98807925	-	MGI:108101	protein coding gene	Ddn	dendrin
15	54.73	98812798	98831508	-	MGI:108411	protein coding gene	Prkag1	protein kinase, AMP-activated, gamma 1 non-catalytic subunit
15	54.8	98831672	98871204	-	MGI:2682319	protein coding gene	Kmt2d	lysine (K)-specific methyltransferase 2D
15	54.99	98877778	98881404	-	MGI:1916409	protein coding gene	Rhebl1	Ras homolog enriched in brain like 1
15	55.05	98893031	98898540	-	MGI:94891	protein coding gene	Dhh	desert hedgehog
15	55.1	98903921	98918231	-	MGI:1289247	protein coding gene	Lmbr1l	limb region 1 like
15	55.21	98931425	98934565	-	MGI:107804	protein coding gene	Tuba1b	tubulin, alpha 1B
15	55.29	98949841	98953551	-	MGI:98869	protein coding gene	Tuba1a	tubulin, alpha 1A
15	55.61	99029891	99038105	+	MGI:1095409	protein coding gene	Tuba1c	tubulin, alpha 1C
15	55.72	99055174	99058978	+	MGI:97774	protein coding gene	Prph	peripherin
15	55.8	99074973	99083407	+	MGI:1925983	protein coding gene	Troap	trophinin associated protein
15	55.84	99084754	99087728	-	MGI:3579909	protein coding gene	C1ql4	complement component 1, q subcomponent-like 4
15	55.87	99093170	99104737	+	MGI:1920028	protein coding gene	Dnajc22	DnaJ (Hsp40) homolog, subfamily C, member 22
15	56.01	99126845	99212466	+	MGI:1919822	protein coding gene	Spats2	spermatogenesis associated, serine-rich 2
15	56.08	99224976	99242817	+	MGI:1341723	protein coding gene	Kcnh3	potassium voltage-gated channel, subfamily H (eag-related), member 3
15	56.09	99242818	99251961	-	MGI:1858420	protein coding gene	Mcrs1	microspherule protein 1
15	56.11	99271018	99287180	-	MGI:3647604	protein coding gene	Fam186b	family with sequence similarity 186, member B
15	56.13	99295087	99317018	+	MGI:1925583	protein coding gene	Prpf40b	PRP40 pre-mRNA processing factor 40 homolog B (yeast)
15	56.13	99317225	99370482	-	MGI:109569	protein coding gene	Fmnl3	formin-like 3
15	56.13	99392882	99410049	+	MGI:99682	protein coding gene	Tmbim6	transmembrane BAX inhibitor motif containing 6
15	56.13	99422035	99457748	-	MGI:3609653	protein coding gene	Nckap5l	NCK-associated protein 5-like
15	56.13	99470084	99474730	-	MGI:1922534	protein coding gene	Bcdin3d	BCDIN3 domain containing
15	56.13	99497005	99528017	-	MGI:1919643	protein coding gene	Faim2	Fas apoptotic inhibitory molecule 2
15	56.13	99579056	99584545	+	MGI:1096865	protein coding gene	Aqp2	aquaporin 2
15	56.13	99591028	99594829	+	MGI:106215	protein coding gene	Aqp5	aquaporin 5
15	56.13	99601400	99605477	+	MGI:1341204	protein coding gene	Aqp6	aquaporin 6
15	56.13	99620496	99651656	-	MGI:1349423	protein coding gene	Racgap1	Rac GTPase-activating protein 1
15	56.13	99670718	99701127	+	MGI:1194915	protein coding gene	Asic1	acid-sensing (proton-gated) ion channel 1
15	56.13	99702176	99705490	-	MGI:4936983	protein coding gene	Gm17349	predicted gene, 17349
15	56.13	99702287	99713995	+	MGI:1933623	protein coding gene	Smarcd1	SWI/SNF related, matrix associated, actin dependent regulator of chromatin, subfamily d, member 1
15	56.13	99717515	99725005	+	MGI:95679	protein coding gene	Gpd1	glycerol-3-phosphate dehydrogenase 1 (soluble)
15	56.13	99725618	99728136	+	MGI:1913629	protein coding gene	Cox14	cytochrome c oxidase assembly protein 14
15	56.13	99733506	99772885	-	MGI:1919199	protein coding gene	Cers5	ceramide synthase 5
15	56.13	99778470	99875428	-	MGI:1920992	protein coding gene	Lima1	LIM domain and actin binding 1
15	56.13	99918348	99967075	-	MGI:2685766	protein coding gene	Fam186a	family with sequence similarity 186, member A
15	56.13	99970074	100016351	+	MGI:2443114	protein coding gene	Larp4	La ribonucleoprotein domain family, member 4
15	56.14	100038664	100219473	+	MGI:2145977	protein coding gene	Dip2b	DIP2 disco-interacting protein 2 homolog B (Drosophila)
15	56.22	100227819	100261244	+	MGI:1298366	protein coding gene	Atf1	activating transcription factor 1
15	56.24	100280837	100293053	+	MGI:1922252	protein coding gene	Tmprss12	transmembrane (C-terminal) protease, serine 12
15	56.25	100304817	100314348	+	MGI:1916523	protein coding gene	Mettl7a1	methyltransferase like 7A1
15	56.27	100334929	100340169	+	MGI:3710670	protein coding gene	Mettl7a3	methyltransferase like 7A3
15	56.27	100353149	100383964	+	MGI:3845761	protein coding gene	Mettl7a2Higd1c	Mettl7a2-Higd1c readthrough transcript
15	56.27	100353200	100361840	+	MGI:3026615	protein coding gene	Mettl7a2	methyltransferase like 7A2
15	56.28	100364542	100383964	+	MGI:2685767	protein coding gene	Higd1c	HIG1 domain family, member 1C
15	56.29	100387898	100425072	-	MGI:1345279	protein coding gene	Slc11a2	solute carrier family 11 (proton-coupled divalent metal ion transporters), member 2
15	56.3	100422147	100428150	+	MGI:3646320	protein coding gene	Gm5475	predicted gene 5475
15	56.31	100469034	100479252	+	MGI:1915864	protein coding gene	Letmd1	LETM1 domain containing 1
15	56.32	100479570	100495239	-	MGI:2386852	protein coding gene	Csrnp2	cysteine-serine-rich nuclear protein 2
15	56.33	100502796	100551947	-	MGI:98509	protein coding gene	Tfcp2	transcription factor CP2
15	56.35	100575318	100599984	-	MGI:102935	protein coding gene	Pou6f1	POU domain, class 6, transcription factor 1
15	56.36	100615662	100620761	+	MGI:1344344	protein coding gene	Dazap2	DAZ associated protein 2
15	56.37	100621342	100636865	-	MGI:2448476	protein coding gene	Smagp	small cell adhesion glycoprotein
15	56.37	100641081	100669499		MGI:3611448	protein coding gene	Bin2	bridging integrator 2
15	56.38	100674425	100687920	-	MGI:95314	protein coding gene	Cela1	chymotrypsin-like elastase family, member 1
15	56.39	100691813	100729376	-	MGI:1891640	protein coding gene	Galnt6	UDP-N-acetyl-alpha-D-galactosamine:polypeptide N-acetylgalactosaminyltransferase 6
15	56.39	100761747	100823968	+	MGI:1928745	protein coding gene	Slc4a8	solute carrier family 4 (anion exchanger), member 8
15	56.39	100936271	101045929	+	MGI:103169	protein coding gene	Scn8a	sodium channel, voltage-gated, type VIII, alpha
15	56.39	101050194	101054399	-	MGI:3646919	protein coding gene	Fignl2	fidgetin-like 2
15	56.39	101115755	101120022	+	MGI:2443398	protein coding gene	Ankrd33	ankyrin repeat domain 33
15	56.41	101128522	101145336	+	MGI:1338946	protein coding gene	Acvrl1	activin A receptor, type II-like 1
15	56.48	101174125	101212601	+	MGI:1338944	protein coding gene	Acvr1b	activin A receptor, type 1B
15	56.57	101224207	101232755	+	MGI:1860303	protein coding gene	Grasp	GRP1 (general receptor for phosphoinositides 1)-associated scaffold protein
15	56.64	101266846	101274792	+	MGI:1352454	protein coding gene	Nr4a1	nuclear receptor subfamily 4, group A, member 1
15	56.67	101284301	101290934	+	MGI:1915368	protein coding gene	9430023L20Rik	RIKEN cDNA 9430023L20 gene
15	56.78	101349571	101370125	-	MGI:1921377	protein coding gene	Krt80	keratin 80
15	56.88	101411043	101430313	+	MGI:96704	protein coding gene	Krt7	keratin 7
15	56.9	101431490	101438804	-	MGI:3665486	protein coding gene	Krt83	keratin 83
15	56.9	101447745	101453909	+	MGI:1913572	protein coding gene	1700011A15Rik	RIKEN cDNA 1700011A15 gene
15	56.9	101459061	101463765	-	MGI:1928858	protein coding gene	Krt81	keratin 81
15	56.9	101473478	101479983	+	MGI:109362	protein coding gene	Krt86	keratin 86
15	56.9	101485131	101491512	-	MGI:3690448	protein coding gene	5430421N21Rik	RIKEN cDNA 5430421N21 gene
15	56.9	101525026	101532820	-	MGI:96700	protein coding gene	Krt84	keratin 84
15	56.9	101541229	101550659	-	MGI:2149248	protein coding gene	Krt82	keratin 82
15	56.9	101552356	101562950	-	MGI:3045312	protein coding gene	4732456N10Rik	RIKEN cDNA 4732456N10 gene
15	56.91	101563345	101573904	-	MGI:1923500	protein coding gene	Krt75	keratin 75
15	56.94	101624028	101628188	-	MGI:3646939	protein coding gene	Gm5414	predicted gene 5414
15	56.97	101676034	101680289	-	MGI:1333768	protein coding gene	Krt6b	keratin 6B
15	56.97	101689932	101694307	-	MGI:1100845	protein coding gene	Krt6a	keratin 6A
15	56.98	101707070	101712891	-	MGI:96702	protein coding gene	Krt5	keratin 5
15	57.0	101733950	101743109	-	MGI:1861586	protein coding gene	Krt71	keratin 71
15	57.01	101754259	101763504	-	MGI:3629975	protein coding gene	Krt74	keratin 74
15	57.02	101776172	101786458	-	MGI:2146034	protein coding gene	Krt72	keratin 72
15	57.03	101793308	101802343	-	MGI:3607712	protein coding gene	Krt73	keratin 73
15	57.03	101810689	101818169	-	MGI:96699	protein coding gene	Krt2	keratin 2
15	57.06	101845428	101850786	-	MGI:96698	protein coding gene	Krt1	keratin 1
15	57.08	101858732	101869705	-	MGI:3588209	protein coding gene	Krt77	keratin 77
15	57.1	101884351	101892920	-	MGI:1924305	protein coding gene	Krt76	keratin 76
15	57.13	101918536	101924735	-	MGI:96701	protein coding gene	Krt4	keratin 4
15	57.14	101929332	101940324	-	MGI:2385030	protein coding gene	Krt79	keratin 79
15	57.15	101946004	101954287	-	MGI:1917529	protein coding gene	Krt78	keratin 78
15	57.2	101996711	102004342	-	MGI:96705	protein coding gene	Krt8	keratin 8
15	57.22	102028216	102032026	+	MGI:96692	protein coding gene	Krt18	keratin 18
15	57.26	102073773	102097172	+	MGI:95304	protein coding gene	Eif4b	eukaryotic translation initiation factor 4B
15	57.29	102102988	102116401	+	MGI:2387586	protein coding gene	Tenc1	tensin like C1 domain-containing phosphatase
15	57.3	102116528	102136234	-	MGI:2446175	protein coding gene	Spryd3	SPRY domain containing 3
15	57.32	102144362	102149511	+	MGI:96441	protein coding gene	Igfbp6	insulin-like growth factor binding protein 6
15	57.33	102150526	102163474	+	MGI:1332226	protein coding gene	Soat2	sterol O-acyltransferase 2
15	57.35	102176998	102189043	-	MGI:2180098	protein coding gene	Csad	cysteine sulfinic acid decarboxylase
15	57.37	102203648	102215606	+	MGI:1915994	protein coding gene	Zfp740	zinc finger protein 740
15	57.39	102215995	102231935	-	MGI:96616	protein coding gene	Itgb7	integrin beta 7
15	57.4	102234938	102257517	-	MGI:97858	protein coding gene	Rarg	retinoic acid receptor, gamma
15	57.44	102279456	102281744	+	MGI:2145901	protein coding gene	Mfsd5	major facilitator superfamily domain containing 5
15	57.45	102296293	102324356	+	MGI:2146156	protein coding gene	Espl1	extra spindle pole bodies 1 (S. cerevisiae)
15	57.48	102326116	102331873	+	MGI:1928753	protein coding gene	Pfdn5	prefoldin 5
15	57.49	102331709	102338139	+	MGI:1929864	protein coding gene	Myg1	melanocyte proliferating gene 1
15	57.49	102338247	102350759	-	MGI:2443767	protein coding gene	Aaas	achalasia, adrenocortical insufficiency, alacrimia
15	57.51	102357177	102366271	-	MGI:2153568	protein coding gene	Sp7	Sp7 transcription factor 7
15	57.55	102406143	102436404	+	MGI:98372	protein coding gene	Sp1	trans-acting transcription factor 1
15	57.58	102445367	102454630	+	MGI:105062	protein coding gene	Amhr2	anti-Mullerian hormone type 2 receptor
15	57.6	102459028	102462806	+	MGI:1913401	protein coding gene	Prr13	proline rich 13
15	57.61	102470632	102500059	+	MGI:108202	protein coding gene	Pcbp2	poly(rC) binding protein 2
15	57.63	102497649	102517064	-	MGI:1346881	protein coding gene	Map3k12	mitogen-activated protein kinase kinase kinase 12
15	57.63	102503722	102503886	+	MGI:3704459	protein coding gene	Gm10337	predicted gene 10337
15	57.65	102518192	102523676	+	MGI:103027	protein coding gene	Tarbp2	TAR (HIV) RNA binding protein 2
15	57.65	102523839	102524942	-	MGI:1891708	protein coding gene	Npff	neuropeptide FF-amide peptide precursor
15	57.66	102525946	102625464	-	MGI:2443472	protein coding gene	Atf7	activating transcription factor 7
15	57.77	102663014	102667749	-	MGI:1915192	protein coding gene	Atp5g2	ATP synthase, H+ transporting, mitochondrial F0 complex, subunit C2 (subunit 9)
15	57.81	102706779	102722178	-	MGI:1914738	protein coding gene	Calcoco1	calcium binding and coiled coil domain 1
15	57.99	102921103	102928814	+	MGI:99560	protein coding gene	Hoxc13	homeobox C13
15	58.01	102936757	102938609	+	MGI:96194	protein coding gene	Hoxc12	homeobox C12
15	58.02	102954427	102957708	+	MGI:96193	protein coding gene	Hoxc11	homeobox C11
15	58.03	102966796	102971893	+	MGI:96192	protein coding gene	Hoxc10	homeobox C10
15	58.07	102967443	103017429	+	MGI:96196	protein coding gene	Hoxc5	homeobox C5
15	58.04	102976439	102985099	+	MGI:96199	protein coding gene	Hoxc9	homeobox C9
15	58.05	102990622	102994267	+	MGI:96198	protein coding gene	Hoxc8	homeobox C8
15	58.06	102998257	103011881	+	MGI:96197	protein coding gene	Hoxc6	homeobox C6
15	58.08	103018936	103036843	+	MGI:96195	protein coding gene	Hoxc4	homeobox C4
15	58.2	103153307	103158002	-	MGI:1918976	protein coding gene	Smug1	single-strand selective monofunctional uracil DNA glycosylase
15	58.34	103191544	103239816	-	MGI:109372	protein coding gene	Cbx5	chromobox 5
15	58.58	103240432	103244955	+	MGI:104820	protein coding gene	Hnrnpa1	heterogeneous nuclear ribonucleoprotein A1
15	58.62	103248212	103258403	-	MGI:97308	protein coding gene	Nfe2	nuclear factor, erythroid derived 2
15	58.74	103272918	103299865	+	MGI:1929063	protein coding gene	Copz1	coatomer protein complex, subunit zeta 1
15	58.88	103308236	103310438	-	MGI:1934129	protein coding gene	Gpr84	G protein-coupled receptor 84
15	58.88	103313895	103340086	-	MGI:1352495	protein coding gene	Zfp385a	zinc finger protein 385A
15	58.9	103344286	103366748	-	MGI:96604	protein coding gene	Itga5	integrin alpha 5 (fibronectin receptor alpha)
15	58.93	103402405	103430470	-	MGI:1921424	protein coding gene	Gtsf1	gametocyte specific factor 1
15	58.96	103438965	103448459	-	MGI:2652828	protein coding gene	BC048502	cDNA sequence BC048502
15	58.96	103453825	103498800	+	MGI:1926063	protein coding gene	Nckap1l	NCK associated protein 1 like
15	58.99	103503298	103530052	+	MGI:97523	protein coding gene	Pde1b	phosphodiesterase 1B, Ca2+-calmodulin dependent
15	59.01	103530279	103537992	-	MGI:1889595	protein coding gene	Ppp1r1a	protein phosphatase 1, regulatory (inhibitor) subunit 1A
15	59.03	103562762	103565078	-	MGI:95759	protein coding gene	Glycam1	glycosylation dependent cell adhesion molecule 1
15	51.44	96051616	96079553	-	MGI:3028082	lincRNA gene	D030018L15Rik	RIKEN cDNA D030018L15 gene
15	51.93	96134819	96284495	-	MGI:1917290	lincRNA gene	2610037D02Rik	RIKEN cDNA 2610037D02 gene
15	52.34	96231869	96254683		MGI:1923018	lincRNA gene	4833422M21Rik	RIKEN cDNA 4833422M21 gene
15	54.7	98807032	98816077	+	MGI:3704458	lincRNA gene	B130046B21Rik	RIKEN cDNA B130046B21 gene
15	55.43	98985965	98989281	+	MGI:1923201	lincRNA gene	4930578M01Rik	RIKEN cDNA 4930578M01 gene
15	56.31	100459739	100468690		MGI:1925532	lincRNA gene	5330439K02Rik	RIKEN cDNA 5330439K02 gene
15	56.36	100614140	100615110	-	MGI:1925695	lincRNA gene	C330013E15Rik	RIKEN cDNA C330013E15 gene
15	56.56	101221196	101224121	-	MGI:2443491	lincRNA gene	A330009N23Rik	RIKEN cDNA A330009N23 gene
15	57.43	102270562	102274127		MGI:3646315	lincRNA gene	Gm9918	predicted gene 9918
15	58.17	103123070	103146828	-	MGI:3715731	lincRNA gene	D930007P13Rik	Riken cDNA D930007P13 gene
15	56.81	101369352	101369434	+	MGI:3836979	miRNA gene	Mir1941	microRNA 1941
15	57.78	102671792	102671866	-	MGI:3629926	miRNA gene	Mir688	microRNA 688
15	58.04	102973350	102973434	+	MGI:3618739	miRNA gene	Mir196a-2	microRNA 196a-2
15	58.08	103014910	103015001	+	MGI:3629927	miRNA gene	Mir615	microRNA 615
15	58.81	103285125	103285221	+	MGI:3618734	miRNA gene	Mir148b	microRNA 148b
15	56.31	100449684	100449793	+	MGI:4421888	rRNA gene	n-R5s43	nuclear encoded rRNA 5S 43
15	54.52	98519717	98519834	-	MGI:3819502	snoRNA gene	Snora34	small nucleolar RNA, H/ACA box 34
15	54.53	98526348	98526459	-	MGI:3819497	snoRNA gene	Snora2b	small nucleolar RNA, H/ACA box 2B
15	50.65	95787856	95791642	-	MGI:3642574	unclassified gene	A130051J06Rik	RIKEN cDNA A130051J0 gene
15	50.7	95824459	95830072	-	MGI:4937180	unclassified gene	Gm17546	predicted gene, 17546
15	53.76	97760408	97766961	+	MGI:3826580	unclassified gene	Rapgef3os1	Rap guanine nucleotide exchange factor (GEF) 3, opposite strand 1
15	56.13	99715543	99724474	-	MGI:4414957	unclassified gene	Gm16537	predicted gene 16537
15	56.13	99765991	99782332	+	MGI:4937885	unclassified gene	Gm17058	predicted gene 17058
15	56.13	99819020	99834570	+	MGI:4937884	unclassified gene	Gm17057	predicted gene 17057
15	56.35	100586096	100592037	+	MGI:5313127	unclassified gene	Gm20680	predicted gene 20680
15	56.39	100695780	100704896	+	MGI:1916281	unclassified gene	Galnt6os	UDP-N-acetyl-alpha-D-galactosamine:polypeptide N-acetylgalactosaminyltransferase 6, opposite strand
15	56.41	101129916	101131592	-	MGI:3801966	unclassified gene	Gm16031	predicted gene 16031
15	56.68	101293212	101296615	+	MGI:1924967	unclassified gene	6030408B16Rik	RIKEN cDNA 6030408B16 gene
15	58.03				MGI:5141863	unclassified gene	Gm20398	predicted gene 20398
15	49.25	95097622	95149318	-	MGI:1920877	unclassified non-coding RNA gene	1700129L04Rik	RIKEN cDNA 1700129L04 gene
15	52.36	96268564	96275275	-	MGI:2442603	unclassified non-coding RNA gene	E330033B04Rik	RIKEN cDNA E330033B04 gene
15	53.76	97766549	97768713	+	MGI:3826581	unclassified non-coding RNA gene	Rapgef3os2	Rap guanine nucleotide exchange factor (GEF) 3, opposite strand 2
15	54.4	98398445	98416135	+	MGI:1920552	unclassified non-coding RNA gene	1700031M16Rik	RIKEN cDNA 1700031M16 gene
15	54.52	98520516	98522216	-	MGI:5011849	unclassified non-coding RNA gene	Gm19664	predicted gene, 19664
15	54.57	98567324	98569583	+	MGI:3704457	unclassified non-coding RNA gene	9330020H09Rik	RIKEN cDNA 9330020H09 gene
15	55.1	98931428	98932754	+	MGI:5011923	unclassified non-coding RNA gene	Gm19738	predicted gene, 19738
15	55.63	99034535	99038110	-	MGI:5011952	unclassified non-coding RNA gene	Gm19767	predicted gene, 19767
15	56.13	99427701	99435313	+	MGI:1918162	unclassified non-coding RNA gene	Nckap5los	NCK-associated protein 5-like, opposite strand
15	56.13	99972167	99973287	-	MGI:1917531	unclassified non-coding RNA gene	2310068J16Rik	RIKEN cDNA 2310068J16 gene
15	56.24	100284896	100297636	-	MGI:5011984	unclassified non-coding RNA gene	Gm19799	predicted gene, 19799
15	56.39	100730505	100732737	-	MGI:3588279	unclassified non-coding RNA gene	I730030J21Rik	RIKEN cDNA I730030J21 gene
15	57.77	102657568	102660469	+	MGI:3782728	unclassified non-coding RNA gene	Gm4544	predicted gene 4544
15	57.94	102852975	102854927		MGI:3641619	unclassified non-coding RNA gene	Gm10831	predicted gene 10831
15	58.01	102944062	102948420	-	MGI:3826586	unclassified non-coding RNA gene	Hotair	HOX transcript antisense RNA (non-protein coding)
15	58.15	103102283	103104601		MGI:3641625	unclassified non-coding RNA gene	Gm10830	predicted gene 10830
15	58.98	103474452	103479066	-	MGI:5012158	unclassified non-coding RNA gene	Gm19973	predicted gene, 19973
15	50.57	95715060	95716496	+	MGI:3647571	pseudogene	Gm8843	predicted gene 8843
15	50.64	95775754	95776232	+	MGI:3647326	pseudogene	Gm8849	predicted gene 8849
15	52.21	96182800	96203470	+	MGI:3782556	pseudogene	Gm4371	predicted gene 4371
15	52.35	96247322	96247919	-	MGI:3644827	pseudogene	Gm8866	predicted gene 8866
15	52.57	96648835	96649275	-	MGI:5011596	pseudogene	Gm19411	predicted gene, 19411
15	52.64	96766761	96767079	-	MGI:3646062	pseudogene	Gm8888	predicted gene 8888
15	52.73	96922724	96923440	-	MGI:3645006	pseudogene	Rpl10a-ps3	ribosomal protein L10A, pseudogene 3
15	52.95	97302352	97302974	-	MGI:3782568	pseudogene	Gm4383	predicted gene 4383
15	54.45	98450357	98450849	+	MGI:3779644	pseudogene	Gm6979	predicted gene 6979
15	54.47	98471419	98471885	+	MGI:3030074	pseudogene	Olfr240-ps1	olfactory receptor 240, pseudogene 1
15	54.48	98475195	98475484	+	MGI:3030114	pseudogene	Olfr280-ps1	olfactory receptor 280, pseudogene 1
15	54.5	98499197	98499471	+	MGI:3030112	pseudogene	Olfr278-ps1	olfactory receptor 278, pseudogene 1
15	55.52	99006056	99006370	+	MGI:3648534	pseudogene	Gm8973	predicted gene 8973
15	56.13	99555836	99556192	-	MGI:3648628	pseudogene	Gm5808	predicted gene 5808
15	56.13	99706505	99706846	-	MGI:4936875	pseudogene	Gm17241	predicted gene, 17241
15	56.13	99810289	99810582	-	MGI:3782652	pseudogene	Gm4468	predicted gene 4468
15	56.13	99880199	99880803	+	MGI:5010280	pseudogene	Gm18095	predicted gene, 18095
15	56.13	99883632	99884430	+	MGI:5011075	pseudogene	Gm18890	predicted gene, 18890
15	56.13	99898287	99898556	-	MGI:3641869	pseudogene	Gm9763	predicted pseudogene 9763
15	56.13	99915420	99915900	-	MGI:5295671	pseudogene	Gm20564	predicted gene, 20564
15	56.9	101503816	101506313	+	MGI:3646630	pseudogene	Gm6042	predicted gene 6042
15	56.92	101587317	101588572	-	MGI:3646316	pseudogene	Gm5476	predicted gene 5476
15	56.93	101608874	101610479	+	MGI:3646317	pseudogene	Gm5477	predicted gene 5477
15	56.95	101638681	101639998	+	MGI:5010036	pseudogene	Gm17851	predicted gene, 17851
15	56.95	101643024	101647380	-	MGI:3646318	pseudogene	Gm5478	predicted pseudogene 5478
15	57.75	102634982	102635336	+	MGI:3705781	pseudogene	Rpl39-ps	ribosomal protein L39, pseudogene
15	57.93	102851872	102852192	+	MGI:5011731	pseudogene	Gm19546	predicted gene, 19546
15	58.96	103445380	103446699	-	MGI:3779834	pseudogene	Gm9106	predicted gene 9106
15	59.04	103586433	103588394	-	MGI:3648830	pseudogene	Gm9108	predicted gene 9108
15	QTL	94629711	94629826		MGI:2148576	QTL	Heal4	wound healing/regeneration 4
15	QTL	97415753	97415885		MGI:2150406	QTL	Cosz3	cocaine seizure 3
15	QTL	97987052	97987160		MGI:3582981	QTL	Cia37	collagen induced arthritis 37
15	QTL	102988005	102988123		MGI:3052784	QTL	Bmca	bile mucin accumulation
15	QTL	102993114	102993272		MGI:2149705	QTL	Skull22	skull morphology 22
15	QTL				MGI:3051265	QTL	Dmyaq3	darker modification of yellow agouti QTL 3
15	QTL				MGI:2387137	QTL	Hdlq4	HDL QTL 4
15	QTL				MGI:3706149	QTL	Ignpq3	IgA nephropathy QTL 3
15	QTL				MGI:3574411	QTL	Mpvq1	mean platelet volume locus 1
15	QTL				MGI:2151217	QTL	Pgia9	proteoglycan induced arthritis 9

## Sheet: All Sanger var HeJB6J SWDlen CI
Chr	Position		Gene	dbSNP	Ref	C3HHeJ	C3HHeJ csq	C57BL6NJ	B6NJ csq
15	48400012		Csmd3	rs235695183	AG	.	-	.	-
15	48400065		Csmd3	rs257122221	A	.	-	.	-
15	48400091		Csmd3	-	A	.	-	.	-
15	48400125		Csmd3	rs213479828	T	.	-	.	-
15	48400943		Csmd3	rs229689750	T	.	-	.	-
15	48400944		Csmd3	rs212280221	AAAT	.	-	.	-
15	48401090		Csmd3	rs236921474	A	.	-	.	-
15	48401095		Csmd3	rs263505536	CACACACACA	.	-	.	-
15	48401794		Csmd3	rs266119826;rs238828997	GTTGTTTGT	.	-	.	-
15	48401818		Csmd3	-	T	.	-	.	-
15	48401824		Csmd3	-	TGTTTGTTC	.	-	.	-
15	48402046		Csmd3	rs250762121	CGTA	.	-	.	-
15	48402301		Csmd3	rs246434649	T	.	-	.	-
15	48402345		Csmd3	rs212675397	A	.	-	.	-
15	48402390		Csmd3	rs216501178	GAGC	.	-	.	-
15	48402433		Csmd3	rs237237447	G	.	-	.	-
15	48402696		Csmd3	rs258923383	TCTATTGCA	.	-	.	-
15	48402727		Csmd3	rs263187714	ACTGGGGACTT	.	-	.	-
15	48402782		Csmd3	rs216727279	ATG	.	-	.	-
15	48402861		Csmd3	rs219965822	TGAAC	.	-	.	-
15	48402880		Csmd3	rs223275267	T	.	-	.	-
15	48402891		Csmd3	rs257422266	CT	.	-	.	-
15	48404151		Csmd3	rs249836870	AACACACACACACACACACACACACACAC	aacacacacacacacacacacacac	nc_transcript_variant	aacacacacacacacacacacacac/aacacacacacacacacacacac	nc_transcript_variant
15	48404394		Csmd3	rs222426889	A	.	-	.	-
15	48405313		Csmd3	rs258679819	A	.	-	.	-
15	48405942		Csmd3	rs257003006	CTGTATGTAGTCA	.	-	.	-
15	48407173		Csmd3	rs251512371	A	.	-	.	-
15	48407580		Csmd3	rs241927835	A	.	-	.	-
15	48407592		Csmd3	rs236446655	TAAAA	.	-	.	-
15	48407745		Csmd3	rs254494323	T	.	-	.	-
15	48408155		Csmd3	-	TATTGTATGAAATCTAA	.	-	.	-
15	48408387		Csmd3	rs232653080	ACTTT	.	-	.	-
15	48408432		Csmd3	rs248399548	A	.	-	.	-
15	48408482		Csmd3	rs220109254	AC	.	-	.	-
15	48408585		Csmd3	-	A	.	-	.	-
15	48408606		Csmd3	rs226109457	CA	.	-	.	-
15	48408652		Csmd3	rs244499836	CA	.	-	.	-
15	48408798		Csmd3	rs214034843	C	.	-	.	-
15	48408845		Csmd3	-	C	.	-	.	-
15	48408847		Csmd3	rs237660607;rs255218942	GTGTT	.	-	.	-
15	48408869		Csmd3	rs234278160	G	.	-	.	-
15	48408978		Csmd3	-	AGT	.	-	.	-
15	48408982		Csmd3	-	TCTACA	.	-	.	-
15	48409262		Csmd3	-	T	.	-	.	-
15	48409615		Csmd3	rs265883700	ACCTCAACTATGTACTAT	.	-	.	-
15	48409738		Csmd3	rs249699836;rs248369237	ATCTGTCTGTCTG	.	-	.	-
15	48410461		Csmd3	rs220960725	GAAACA	.	-	.	-
15	48410519		Csmd3	-	G	.	-	.	-
15	48410564		Csmd3	-	C	.	-	.	-
15	48410566		Csmd3	rs214368641	T	.	-	.	-
15	48410567		Csmd3	rs225581107;rs246509266	GCACACACACA	.	-	.	-
15	48410576		Csmd3	-	CACACA	.	-	.	-
15	48410850		Csmd3	-	A	.	-	.	-
15	48410851		Csmd3	rs240611487	G	.	-	.	-
15	48410860		Csmd3	-	GGAA	.	-	.	-
15	48410861		Csmd3	rs240056399	GAA	.	-	.	-
15	48411618		Csmd3	rs217817127	AAGAGAGAGAGAGAGAGAGAGAGAG	.	-	.	-
15	48411655		Csmd3	-	AGAGT	.	-	.	-
15	48411758		Csmd3	rs234989361	ATGGCCAATTAT	.	-	.	-
15	48412106		Csmd3	rs234433064	TAAACC	.	-	.	-
15	48412347		Csmd3	rs256945474	GACA	.	-	.	-
15	48412594		Csmd3	rs238409051	TCTC	.	-	.	-
15	48412695		Csmd3	rs243917549	T	.	-	.	-
15	48412990		Csmd3	rs226935523	G	.	-	.	-
15	48413421		Csmd3	rs225524463	G	.	-	.	-
15	48413830		Csmd3	-	A	.	-	.	-
15	48413843		Csmd3	-	GA	.	-	.	-
15	48413879		Csmd3	-	A	.	-	.	-
15	48413899		Csmd3	-	AG	.	-	.	-
15	48414092		Csmd3	-	AGGCTATT	.	-	.	-
15	48414120		Csmd3	rs253726821	G	.	-	.	-
15	48414437		Csmd3	rs254620092	T	.	-	.	-
15	48414597		Csmd3	rs216209492	T	.	-	.	-
15	48414622		Csmd3	-	G	.	-	.	-
15	48414637		Csmd3	rs236950920;rs230791146	AG	.	-	.	-
15	48414868		Csmd3	rs247812742	G	.	-	.	-
15	48414873		Csmd3	rs265746926	TAAA	.	-	.	-
15	48415095		Csmd3	rs217441591	A	.	-	.	-
15	48415106		Csmd3	rs255830273	G	.	-	.	-
15	48415121		Csmd3	-	T	.	-	.	-
15	48415141		Csmd3	rs219286518	AT	.	-	.	-
15	48415388		Csmd3	rs257764495	T	.	-	.	-
15	48415409		Csmd3	rs227381277;rs231498603	TACAC	.	-	.	-
15	48415522		Csmd3	-	T	.	-	.	-
15	48415523		Csmd3	rs260315761	CCT	.	-	.	-
15	48415529		Csmd3	-	C	.	-	.	-
15	48415534		Csmd3	-	CACACACA	.	-	.	-
15	48416136		Csmd3	rs219423920	TGTTTTG	.	-	.	-
15	48416142		Csmd3	rs239521770	G	.	-	.	-
15	48416152		Csmd3	rs247590681	G	.	-	.	-
15	48416390		Csmd3	rs243262810	G	.	-	.	-
15	48416393		Csmd3	rs239433293	TTTTTG	.	-	.	-
15	48416409		Csmd3	rs266008884	T	.	-	.	-
15	48416432		Csmd3	rs261948004	T	.	-	.	-
15	48416663		Csmd3	rs249903206	GA	.	-	.	-
15	48416826		Csmd3	rs251089155	TGCGCAGA	.	-	.	-
15	48417121		Csmd3	rs258502425;rs255137544	TCA	.	-	.	-
15	48417140		Csmd3	-	CACGT	.	-	.	-
15	48417141		Csmd3	-	A	.	-	.	-
15	48417142		Csmd3	-	CGT	.	-	.	-
15	48417201		Csmd3	rs228984123;rs230388728	AGTGTGTGTGTGT	.	-	.	-
15	48417230		Csmd3	-	ATG	.	-	.	-
15	48417316		Csmd3	rs264748923	AT	.	-	.	-
15	48417559		Csmd3	rs257419355	CTTTCTAAAT	.	-	.	-
15	48417711		Csmd3	rs222229370	TTTTG	.	-	.	-
15	48417731		Csmd3	-	ATCT	.	-	.	-
15	48417898		Csmd3	rs241762773	CG	.	-	.	-
15	48418112		Csmd3	rs250888874	T	.	-	.	-
15	48418182		Csmd3	rs253545150	ATAATAT	.	-	.	-
15	48418625		Csmd3	rs216557883	CT	.	-	.	-
15	48418683		Csmd3	rs235857710	T	.	-	.	-
15	48418698		Csmd3	-	CT	.	-	.	-
15	48418892		Csmd3	rs229414250	AG	.	-	.	-
15	48419005		Csmd3	rs253555746	C	.	-	.	-
15	48419231		Csmd3	rs223365994	CAT	.	-	.	-
15	48419731		Csmd3	rs259048720	TG	.	-	.	-
15	48420042		Csmd3	rs231654578	C	.	-	.	-
15	48420225		Csmd3	-	G	.	-	.	-
15	48420288		Csmd3	-	A	.	-	.	-
15	48420370		Csmd3	rs250653640	AT	.	-	.	-
15	48420432		Csmd3	rs242693659	A	.	-	.	-
15	48421020		Csmd3	rs254697930	TG	.	-	.	-
15	48421021		Csmd3	rs244444248	G	.	-	.	-
15	48421035		Csmd3	-	T	.	-	.	-
15	48421037		Csmd3	-	T	.	-	.	-
15	48421042		Csmd3	rs214661918	G	.	-	.	-
15	48421242		Csmd3	-	ATG	.	-	.	-
15	48421474		Csmd3	rs252164282	A	.	-	.	-
15	48422126		Csmd3	rs252148175	G	.	-	.	-
15	48422259		Csmd3	rs264001279	TA	.	-	.	-
15	48422398		Csmd3	-	ATATG	.	-	.	-
15	48422497		Csmd3	rs252204958	C	.	-	.	-
15	48422934		Csmd3	rs256978342	TACACACACACGCACACACACACACACAC	.	-	.	-
15	48423272		Csmd3	-	CCTCT	.	-	.	-
15	48423317		Csmd3	-	CT	.	-	.	-
15	48423319		Csmd3	rs253199030	C	.	-	.	-
15	48423361		Csmd3	rs223140077	A	.	-	.	-
15	48423481		Csmd3	rs262517118	GAAAAAAAAA	.	-	.	-
15	48423486		Csmd3	rs231852117	AAAAAAAAAAAAAAAG	.	-	.	-
15	48423493		Csmd3	-	AAAAAAAAG	.	-	.	-
15	48423650		Csmd3	rs219642926	AC	.	-	.	-
15	48423974		Csmd3	rs221426312	C	.	-	.	-
15	48424141		Csmd3	-	GA	.	-	.	-
15	48424142		Csmd3	rs234635194	ATTTT	.	-	.	-
15	48424173		Csmd3	rs249600928	C	.	-	.	-
15	48424186		Csmd3	-	AT	.	-	.	-
15	48425034		Csmd3	-	TTGCCCTAG	.	-	.	-
15	48425039		Csmd3	rs261678880	CTAGTGACA	.	-	.	-
15	48425094		Csmd3	-	G	.	-	.	-
15	48425755		Csmd3	rs234842797	TG	.	-	.	-
15	48425816		Csmd3	rs229184133	ACTT	.	-	.	-
15	48426061		Csmd3	rs258969225	TTCA	.	-	.	-
15	48426409		Csmd3	rs235199025	A	.	-	.	-
15	48426608		Csmd3	-	TG	.	-	.	-
15	48427426		Csmd3	rs229852647	G	.	-	.	-
15	48427559		Csmd3	rs220008516	GTA	.	-	.	-
15	48427703		Csmd3	rs247044140	T	.	-	.	-
15	48427758		Csmd3	rs219225972	CT	.	-	.	-
15	48427821		Csmd3	rs212535329	G	.	-	.	-
15	48427833		Csmd3	-	A	.	-	.	-
15	48427835		Csmd3	rs213541588	C	.	-	.	-
15	48428243		Csmd3	rs236463004	AT	.	-	.	-
15	48428429		Csmd3	rs212422526	TAAAA	.	-	.	-
15	48428430		Csmd3	rs259125338	A	.	-	.	-
15	48429376		Csmd3	rs264578258	CA	.	-	.	-
15	48429377		Csmd3	rs254464236	AC	.	-	.	-
15	48429926		Csmd3	rs254262993	AT	.	-	.	-
15	48430417		Csmd3	rs252179102	CAT	.	-	.	-
15	48430638		Csmd3	rs251009308;rs214498544	GTT	.	-	.	-
15	48430693		Csmd3	rs253925652	GTT	.	-	.	-
15	48430992		Csmd3	-	TG	.	-	.	-
15	48431059		Csmd3	rs243458743	TAA	.	-	.	-
15	48433213		Csmd3	-	AT	.	-	.	-
15	48433214		Csmd3	rs243043475	T	.	-	TTAGA*	nc_transcript_variant feature_elongation
15	48433257		Csmd3	-	G	.	-	.	-
15	48433305		Csmd3	rs219022654	CA	.	-	.	-
15	48433424		Csmd3	rs237667671	TTTTG	.	-	.	-
15	48433436		Csmd3	rs215798340	GTTTGT	.	-	.	-
15	48433451		Csmd3	-	TTTTG	.	-	.	-
15	48433877		Csmd3	rs223508532	G	.	-	.	-
15	48434516		Csmd3	rs237631984	TA	.	-	.	-
15	48434625		Csmd3	rs244195647	TG	.	-	.	-
15	48435045		Csmd3	rs216681345	C	.	-	.	-
15	48435054		Csmd3	-	T	.	-	.	-
15	48435268		Csmd3	rs263374158	TG	.	-	.	-
15	48435426		Csmd3	rs255929711	AT	.	-	.	-
15	48435527		Csmd3	rs229618307	C	.	-	.	-
15	48435533		Csmd3	-	TTTAATTAA	.	-	.	-
15	48435553		Csmd3	-	A	.	-	.	-
15	48436426		Csmd3	rs242872827	G	.	-	.	-
15	48436434		Csmd3	rs229651844	T	.	-	.	-
15	48436539		Csmd3	rs226435762	AC	.	-	.	-
15	48436636		Csmd3	rs236563427;rs224042437	CA	.	-	.	-
15	48436696		Csmd3	rs243521030	T	.	-	.	-
15	48436760		Csmd3	rs220103596	GTT	.	-	.	-
15	48436782		Csmd3	-	ATGTGTGTGTGTGTG	atgtgtgtgtgtg	nc_transcript_variant	.	-
15	48438823		Csmd3	rs240815112	TAAA	.	-	.	-
15	48438870		Csmd3	-	AAAAG	.	-	.	-
15	48438908		Csmd3	-	A	.	-	.	-
15	48439143		Csmd3	rs245094628	AAGAC	.	-	.	-
15	48439333		Csmd3	-	GGAGGGGAGGAGGAAGA	.	-	.	-
15	48439912		Csmd3	rs242949998	C	.	-	.	-
15	48439935		Csmd3	rs250876082	TC	.	-	.	-
15	48440034		Csmd3	rs242045596	CAGCAGCA	.	-	.	-
15	48440303		Csmd3	rs240658444	ATTAGAATTTAAGCT	.	-	.	-
15	48440631		Csmd3	rs241325230	GC	.	-	.	-
15	48441045		Csmd3	rs213228555	AAC	.	-	.	-
15	48441529		Csmd3	rs235574657	AG	.	-	.	-
15	48441787		Csmd3	-	A	.	-	.	-
15	48442031		Csmd3	-	ACT	.	-	.	-
15	48442060		Csmd3	rs244998831	CATATATATATATATAT	.	-	.	-
15	48442080		Csmd3	-	TATATATATATATA	.	-	.	-
15	48442306		Csmd3	rs262423716	GAAGCC	.	-	.	-
15	48442797		Csmd3	rs235305822	C	.	-	.	-
15	48443217		Csmd3	rs222608391	CAT	.	-	.	-
15	48443229		Csmd3	-	TAAA	.	-	.	-
15	48443371		Csmd3	rs214301680	GAA	.	-	.	-
15	48443905		Csmd3	rs251202188	T	.	-	.	-
15	48443911		Csmd3	rs218612614	GT	.	-	.	-
15	48443978		Csmd3	rs233680561	GA	.	-	.	-
15	48444629		Csmd3	rs215436862	GGC	.	-	.	-
15	48444689		Csmd3	rs260116979	GTAAATAAATAAA	.	-	.	-
15	48444772		Csmd3	-	TAC	.	-	.	-
15	48444828		Csmd3	rs266209875;rs247327004	GAAA	.	-	.	-
15	48445238		Csmd3	rs229926779	GA	.	-	.	-
15	48445609		Csmd3	-	CTA	.	-	.	-
15	48445667		Csmd3	-	A	.	-	.	-
15	48445917		Csmd3	rs251955057	CAAGT	.	-	.	-
15	48445962		Csmd3	rs222517735	CT	.	-	.	-
15	48446285		Csmd3	rs241802401	T	.	-	.	-
15	48446426		Csmd3	rs257308717	CA	.	-	.	-
15	48446744		Csmd3	rs259173504;rs260888649	CATCTATCTATCTATCTATCTATCTATCT	.	-	.	-
15	48446776		Csmd3	-	T	.	-	.	-
15	48446799		Csmd3	-	C	.	-	.	-
15	48446874		Csmd3	rs250189599	TC	.	-	.	-
15	48447480		Csmd3	-	GGT	.	-	.	-
15	48447484		Csmd3	-	TA	.	-	.	-
15	48447670		Csmd3	-	T	.	-	.	-
15	48447671		Csmd3	rs226768597;rs255546046	GAAAA	.	-	.	-
15	48447683		Csmd3	-	AAAC	.	-	.	-
15	48447685		Csmd3	-	A	.	-	.	-
15	48448096		Csmd3	rs213626154	CAA	.	-	.	-
15	48448174		Csmd3	rs217927903	A	.	-	.	-
15	48448604		Csmd3	rs259492891	CAAAG	.	-	.	-
15	48449137		Csmd3	rs227867465	A	.	-	.	-
15	48449143		Csmd3	rs222315286	C	.	-	.	-
15	48449329		Csmd3	-	CAAGA	.	-	.	-
15	48449748		Csmd3	rs232253204	TCTAA	.	-	.	-
15	48449796		Csmd3	rs238765175	C	.	-	.	-
15	48449800		Csmd3	-	T	.	-	.	-
15	48449807		Csmd3	rs254709138	A	.	-	.	-
15	48449829		Csmd3	-	AT	.	-	.	-
15	48449843		Csmd3	rs220002844	GT	.	-	.	-
15	48450052		Csmd3	rs237085016	A	.	-	.	-
15	48450442		Csmd3	rs240374303	TAGCTGCAAGA	.	-	.	-
15	48450564		Csmd3	rs214178800	G	.	-	.	-
15	48450572		Csmd3	-	ATG	.	-	.	-
15	48450574		Csmd3	-	G	.	-	.	-
15	48450584		Csmd3	rs264762789	A	.	-	.	-
15	48450697		Csmd3	rs262084675	A	.	-	.	-
15	48450698		Csmd3	rs217660621	CA	.	-	.	-
15	48450699		Csmd3	rs248522381	A	.	-	.	-
15	48450706		Csmd3	rs227009316	A	.	-	.	-
15	48451109		Csmd3	rs261136853	A	.	-	.	-
15	48451900		Csmd3	rs242504522	G	.	-	.	-
15	48452141		Csmd3	rs251501680	ACT	.	-	.	-
15	48452151		Csmd3	rs265631418	C	.	-	.	-
15	48452494		Csmd3	-	AG	.	-	.	-
15	48452499		Csmd3	-	AG	.	-	.	-
15	48452501		Csmd3	-	GA	.	-	.	-
15	48452505		Csmd3	-	GAAA	.	-	.	-
15	48452579		Csmd3	rs215160168	CA	.	-	.	-
15	48452599		Csmd3	rs245981089	CTA	.	-	.	-
15	48452660		Csmd3	rs233198877	A	.	-	.	-
15	48452683		Csmd3	rs217396308	GAA	.	-	.	-
15	48452743		Csmd3	rs233579416	A	.	-	.	-
15	48452746		Csmd3	rs243697444	G	.	-	.	-
15	48452998		Csmd3	rs255737276	A	.	-	.	-
15	48453026		Csmd3	rs217658622	AC	.	-	.	-
15	48453373		Csmd3	rs235203120	A	.	-	.	-
15	48453382		Csmd3	-	T	.	-	.	-
15	48453438		Csmd3	rs226228989	CT	.	-	.	-
15	48454162		Csmd3	rs234175913	C	.	-	.	-
15	48454580		Csmd3	-	T	.	-	.	-
15	48454584		Csmd3	rs237587998	C	.	-	.	-
15	48454587		Csmd3	rs241230173	T	.	-	.	-
15	48454757		Csmd3	rs244863476	AATAAAGTGGTCCC	.	-	.	-
15	48455017		Csmd3	-	AACATGTACACACACAC	.	-	.	-
15	48455022		Csmd3	rs234769237	GTACACACACACACA	.	-	.	-
15	48455037		Csmd3	rs219561843	TACACACAC	TAC	nc_transcript_variant	tacacacacac	nc_transcript_variant
15	48455537		Csmd3	rs245359871	T	.	-	.	-
15	48455618		Csmd3	rs225945213	C	.	-	.	-
15	48455714		Csmd3	rs237510720	GA	.	-	.	-
15	48455745		Csmd3	rs229130063	A	.	-	.	-
15	48455752		Csmd3	rs233628892	T	.	-	.	-
15	48455753		Csmd3	rs262540975	G	.	-	.	-
15	48455759		Csmd3	-	G	.	-	.	-
15	48456106		Csmd3	rs242259917	AAAT	.	-	.	-
15	48456151		Csmd3	rs245303263	A	.	-	.	-
15	48457183		Csmd3	rs215624710	T	.	-	.	-
15	48457431		Csmd3	rs218481449	TAAAAA	.	-	.	-
15	48457578		Csmd3	rs231487901	T	.	-	.	-
15	48457890		Csmd3	rs263943423	TGAAA	.	-	.	-
15	48458570		Csmd3	rs241284582	G	.	-	.	-
15	48458580		Csmd3	-	T	.	-	.	-
15	48458844		Csmd3	rs225581251	CAGCT	.	-	.	-
15	48459211		Csmd3	rs231117122	T	.	-	.	-
15	48459400		Csmd3	-	C	.	-	.	-
15	48459412		Csmd3	rs217856694	T	.	-	.	-
15	48459429		Csmd3	-	AT	.	-	.	-
15	48459769		Csmd3	rs258922121	T	.	-	.	-
15	48459820		Csmd3	rs259392749	CA	.	-	.	-
15	48459946		Csmd3	rs261000131	GA	.	-	.	-
15	48460314		Csmd3	rs213176825	GAT	.	-	.	-
15	48460340		Csmd3	rs226674522	CTTTAGAAAAAAA	.	-	.	-
15	48460940		Csmd3	rs216079480	T	.	-	.	-
15	48460948		Csmd3	rs235869896	G	.	-	.	-
15	48460954		Csmd3	rs248695215	AAAACCG	.	-	.	-
15	48461291		Csmd3	rs232440885	AAGCTG	.	-	.	-
15	48461311		Csmd3	rs244588785	A	.	-	.	-
15	48461347		Csmd3	-	GAAAC	.	-	.	-
15	48461383		Csmd3	rs235405098	GAGAT	.	-	.	-
15	48461403		Csmd3	-	CAGAGAGA	.	-	.	-
15	48461406		Csmd3	-	AG	.	-	.	-
15	48461451		Csmd3	rs259961696	C	.	-	.	-
15	48461653		Csmd3	rs236158140	T	.	-	.	-
15	48461921		Csmd3	rs228865511	A	.	-	.	-
15	48462040		Csmd3	rs235355548	G	.	-	.	-
15	48462145		Csmd3	-	GAGATATATATATTTATATATATATATATATATATATATATATAT	.	-	.	-
15	48462204		Csmd3	rs261040158	AATGATTTT	.	-	.	-
15	48462898		Csmd3	rs239278348	TC	.	-	.	-
15	48463068		Csmd3	rs245500706	T	.	-	.	-
15	48463163		Csmd3	rs237490577	A	.	-	.	-
15	48463708		Csmd3	-	TG	.	-	.	-
15	48463712		Csmd3	-	AT	.	-	.	-
15	48463737		Csmd3	-	G	.	-	.	-
15	48463805		Csmd3	-	G	.	-	.	-
15	48463808		Csmd3	-	T	.	-	.	-
15	48464047		Csmd3	rs243204734	C	.	-	.	-
15	48464233		Csmd3	rs253360461	CA	.	-	.	-
15	48464475		Csmd3	-	AGGT	.	-	.	-
15	48464476		Csmd3	rs241723093	GGTTT	.	-	.	-
15	48464540		Csmd3	rs256043693	CT	.	-	.	-
15	48464767		Csmd3	rs260715265	CT	.	-	.	-
15	48464882		Csmd3	rs229543147	T	.	-	.	-
15	48464961		Csmd3	-	CTAAATTT	.	-	.	-
15	48466111		Csmd3	-	CAGGATGCAATCTTAAGGATG	.	-	.	-
15	48466356		Csmd3	rs243899661	TTC	.	-	.	-
15	48467348		Csmd3	rs246909751	AT	.	-	.	-
15	48467410		Csmd3	rs224959295	T	.	-	.	-
15	48467812		Csmd3	rs211814693	TA	.	-	.	-
15	48467840		Csmd3	rs247764953	G	.	-	.	-
15	48468004		Csmd3	rs247999877	TTTG	.	-	.	-
15	48468005		Csmd3	rs220514427	TTG	.	-	.	-
15	48468250		Csmd3	rs244475860	AC	.	-	.	-
15	48468337		Csmd3	rs261129617	TA	.	-	.	-
15	48468992		Csmd3	rs227758418	ATT	.	-	.	-
15	48469380		Csmd3	rs254231282	C	.	-	.	-
15	48469577		Csmd3	-	G	.	-	.	-
15	48469649		Csmd3	rs230663482	C	.	-	.	-
15	48469743		Csmd3	rs237542564	C	.	-	.	-
15	48469752		Csmd3	-	A	.	-	.	-
15	48469871		Csmd3	-	AG	.	-	.	-
15	48469872		Csmd3	-	G	.	-	.	-
15	48469876		Csmd3	-	A	.	-	.	-
15	48469899		Csmd3	rs252318653	TG	.	-	.	-
15	48470042		Csmd3	rs241773688	G	.	-	.	-
15	48470347		Csmd3	rs265486710	CA	.	-	.	-
15	48470415		Csmd3	rs221313450	ATAAT	.	-	.	-
15	48470531		Csmd3	-	GACCT	.	-	.	-
15	48470625		Csmd3	rs257060582	GTTT	.	-	.	-
15	48470674		Csmd3	rs229849653	AG	.	-	.	-
15	48470768		Csmd3	rs240372358	T	.	-	.	-
15	48470921		Csmd3	rs237212722	GA	.	-	.	-
15	48471168		Csmd3	-	GAAA	.	-	.	-
15	48471202		Csmd3	rs253365624	CTG	.	-	.	-
15	48471350		Csmd3	rs259093738	A	.	-	.	-
15	48471764		Csmd3	rs215481217	A	.	-	.	-
15	48471771		Csmd3	-	T	.	-	.	-
15	48471836		Csmd3	rs257755557	T	.	-	.	-
15	48472077		Csmd3	-	G	.	-	.	-
15	48472096		Csmd3	-	A	.	-	.	-
15	48472147		Csmd3	-	A	.	-	.	-
15	48472220		Csmd3	-	AG	.	-	.	-
15	48472228		Csmd3	-	G	.	-	.	-
15	48472548		Csmd3	rs249394439	GAGAA	.	-	.	-
15	48472561		Csmd3	rs260317541	TA	.	-	.	-
15	48473284		Csmd3	rs215577334	T	.	-	.	-
15	48473296		Csmd3	-	G	.	-	.	-
15	48473319		Csmd3	rs219235821	A	.	-	.	-
15	48473436		Csmd3	rs221740823	GAA	.	-	.	-
15	48473606		Csmd3	rs223061399	TC	.	-	.	-
15	48473634		Csmd3	-	CT	.	-	.	-
15	48473710		Csmd3	rs219436428	GCTTT	.	-	.	-
15	48473734		Csmd3	-	CA	.	-	.	-
15	48473923		Csmd3	rs223462322	C	.	-	.	-
15	48474246		Csmd3	-	G	.	-	.	-
15	48474248		Csmd3	-	T	.	-	.	-
15	48474485		Csmd3	rs227330800	G	.	-	.	-
15	48474489		Csmd3	rs247611500	AG	.	-	.	-
15	48475053		Csmd3	rs243917568	A	.	-	.	-
15	48475060		Csmd3	rs247516484	TAA	.	-	.	-
15	48475200		Csmd3	rs233001922	CAAA	.	-	.	-
15	48475276		Csmd3	rs252282167	T	.	-	.	-
15	48475283		Csmd3	rs239124176	A	.	-	.	-
15	48475551		Csmd3	-	A	.	-	.	-
15	48475557		Csmd3	-	A	.	-	.	-
15	48475629		Csmd3	rs235512446	TTA	.	-	.	-
15	48475639		Csmd3	rs259958002	TGA	.	-	.	-
15	48476337		Csmd3	rs234801850	A	.	-	.	-
15	48476793		Csmd3	rs213847861	AAT	.	-	.	-
15	48476827		Csmd3	rs251182029	A	.	-	.	-
15	48476908		Csmd3	rs255505289	TA	.	-	.	-
15	48477018		Csmd3	rs223388487	GT	.	-	.	-
15	48477194		Csmd3	rs237801335	T	.	-	.	-
15	48477390		Csmd3	rs241557638	A	.	-	.	-
15	48477479		Csmd3	rs254413599;rs223543344	CAT	.	-	.	-
15	48477505		Csmd3	rs227564631	T	.	-	.	-
15	48477696		Csmd3	rs227750401	TGGA	.	-	.	-
15	48477759		Csmd3	rs234297156	AT	.	-	.	-
15	48477967		Csmd3	-	ATTAGTTTTGT	.	-	.	-
15	48477970		Csmd3	rs235917004;rs265171914	AGTTTTGTTTTGTTTT	.	-	.	-
15	48477989		Csmd3	rs257277474	TTG	.	-	.	-
15	48478048		Csmd3	-	T	.	-	.	-
15	48478591		Csmd3	rs252692429	TATTGGATAATGCTTTAGA	.	-	.	-
15	48478802		Csmd3	rs250543152	GAA	.	-	.	-
15	48479289		Csmd3	-	T	.	-	.	-
15	48479293		Csmd3	rs250088938	TA	.	-	.	-
15	48479387		Csmd3	rs217933544	ATT	.	-	.	-
15	48479755		Csmd3	-	C	.	-	.	-
15	48480044		Csmd3	rs239341919	T	.	-	.	-
15	48480668		Csmd3	rs255999309	A	.	-	.	-
15	48480798		Csmd3	rs263882156	G	.	-	.	-
15	48480967		Csmd3	rs245703089	TC	.	-	.	-
15	48481103		Csmd3	rs250124667	T	.	-	.	-
15	48481129		Csmd3	-	AGC	.	-	.	-
15	48481343		Csmd3	rs264265262	AAGAAATTG	.	-	.	-
15	48481658		Csmd3	rs241562582	CT	.	-	.	-
15	48481794		Csmd3	rs257489752	AT	.	-	.	-
15	48482135		Csmd3	rs211872413	GC	.	-	.	-
15	48482321		Csmd3	rs261211106	AG	.	-	.	-
15	48482387		Csmd3	rs262177393	TAAA	TAA	nc_transcript_variant	.	-
15	48482894		Csmd3	rs233663588	A	.	-	.	-
15	48482898		Csmd3	rs255118658	T	.	-	.	-
15	48482991		Csmd3	rs231937606	CA	.	-	.	-
15	48483012		Csmd3	rs257552399	CAAA	.	-	.	-
15	48483020		Csmd3	rs220278802	AT	.	-	.	-
15	48483125		Csmd3	rs221682333	C	.	-	.	-
15	48483345		Csmd3	rs213264054	C	.	-	.	-
15	48483384		Csmd3	rs266014384	AC	.	-	.	-
15	48484149		Csmd3	rs222021763;rs213773653	TAA	.	-	.	-
15	48484270		Csmd3	rs219767747	T	.	-	.	-
15	48484402		Csmd3	rs242964936;rs232573892	CAAA	.	-	.	-
15	48484490		Csmd3	rs229501046	TA	.	-	.	-
15	48484496		Csmd3	-	AAAT	.	-	.	-
15	48484637		Csmd3	rs216345147	T	.	-	.	-
15	48484892		Csmd3	rs221447397	A	.	-	.	-
15	48485468		Csmd3	rs241614519	T	.	-	.	-
15	48485655		Csmd3	rs239391505;rs261665877	GAAAA	.	-	.	-
15	48485713		Csmd3	rs218481581	AT	.	-	.	-
15	48485854		Csmd3	rs237485606	CCACCTA	.	-	.	-
15	48485865		Csmd3	-	TG	.	-	.	-
15	48486025		Csmd3	rs250288471	AC	.	-	.	-
15	48486399		Csmd3	rs253131306	A	.	-	.	-
15	48487046		Csmd3	-	A	.	-	.	-
15	48487434		Csmd3	rs251834171	G	.	-	.	-
15	48487536		Csmd3	rs221408866	TTGAAGAG	.	-	.	-
15	48487733		Csmd3	-	T	.	-	.	-
15	48487777		Csmd3	-	CT	.	-	.	-
15	48488243		Csmd3	-	GA	.	-	.	-
15	48488691		Csmd3	rs255617937	CT	.	-	.	-
15	48488702		Csmd3	rs246476915	G	.	-	.	-
15	48488733		Csmd3	rs234037203	T	.	-	.	-
15	48488781		Csmd3	-	T	.	-	.	-
15	48488941		Csmd3	rs264881559	A	.	-	.	-
15	48489048		Csmd3	rs263149419	T	.	-	.	-
15	48489290		Csmd3	rs260586942	AT	.	-	.	-
15	48490326		Csmd3	rs215714677	GAA	.	-	.	-
15	48490752		Csmd3	rs238986494	C	.	-	.	-
15	48491645		Csmd3	rs218016233	T	.	-	.	-
15	48492344		Csmd3	rs233786797	GA	.	-	.	-
15	48492710		Csmd3	rs213400194	T	.	-	.	-
15	48492716		Csmd3	-	C	.	-	.	-
15	48492719		Csmd3	rs239228001	C	.	-	.	-
15	48493564		Csmd3	rs249259756	T	.	-	.	-
15	48493701		Csmd3	rs237997506;rs228624920	GA	.	-	.	-
15	48493711		Csmd3	-	A	.	-	.	-
15	48493888		Csmd3	rs224196563	AT	.	-	.	-
15	48493890		Csmd3	rs219820766	TA	.	-	.	-
15	48493921		Csmd3	rs234378594	C	.	-	.	-
15	48494482		Csmd3	rs237984613	AG	.	-	.	-
15	48494794		Csmd3	rs239679531	T	.	-	.	-
15	48494945		Csmd3	rs243288292	T	.	-	.	-
15	48495468		Csmd3	rs261986235	TA	.	-	.	-
15	48495888		Csmd3	rs257375651;rs251277210	CAA	.	-	.	-
15	48495900		Csmd3	-	A	.	-	.	-
15	48496103		Csmd3	-	GGTGA	.	-	.	-
15	48497275		Csmd3	rs216743655	GA	.	-	.	-
15	48497280		Csmd3	-	GA	.	-	.	-
15	48497521		Csmd3	-	CAT	.	-	.	-
15	48497524		Csmd3	rs247830019	ATTT	.	-	.	-
15	48497583		Csmd3	rs219878599	TTA	.	-	.	-
15	48497639		Csmd3	rs248062223	C	.	-	.	-
15	48497728		Csmd3	rs252432305	AAGATGGTTGTG	.	-	.	-
15	48497895		Csmd3	-	TAGG	.	-	.	-
15	48497982		Csmd3	-	TCA	.	-	.	-
15	48498047		Csmd3	rs226240991	GAAACAAAC	.	-	.	-
15	48498050		Csmd3	-	AC	.	-	.	-
15	48498054		Csmd3	-	AC	.	-	.	-
15	48498208		Csmd3	rs236907117	C	.	-	.	-
15	48498351		Csmd3	rs230148614	CTT	.	-	.	-
15	48498356		Csmd3	-	T	.	-	.	-
15	48504279		Csmd3	-	TG	.	-	.	-
15	48504329		Csmd3	-	T	.	-	.	-
15	48504337		Csmd3	-	G	.	-	.	-
15	48504519		Csmd3	rs225020585	TA	.	-	.	-
15	48505463		Csmd3	-	CAAAT	.	-	.	-
15	48505761		Csmd3	rs237223902	T	.	-	.	-
15	48505783		Csmd3	rs224246547	GTA	.	-	.	-
15	48506203		Csmd3	rs247320593	C	.	-	.	-
15	48506265		Csmd3	-	CTCT	.	-	.	-
15	48506266		Csmd3	rs240077180	TC	.	-	.	-
15	48506273		Csmd3	-	T	.	-	.	-
15	48506286		Csmd3	rs246645474	GA	.	-	.	-
15	48506581		Csmd3	rs259162060	G	.	-	.	-
15	48506885		Csmd3	rs258728936	TAA	.	-	.	-
15	48507121		Csmd3	rs236783736;rs256172371	C	.	-	.	-
15	48507146		Csmd3	-	TCATCTA	.	-	.	-
15	48507319		Csmd3	-	AC	.	-	.	-
15	48507598		Csmd3	-	TC	.	-	.	-
15	48508119		Csmd3	rs257046077	G	.	-	.	-
15	48508402		Csmd3	rs214129194	T	.	-	.	-
15	48508428		Csmd3	rs249709214	A	.	-	.	-
15	48508473		Csmd3	-	AGCTCAC	.	-	.	-
15	48508474		Csmd3	rs238753357	GCTCACACA	.	-	.	-
15	48508673		Csmd3	rs217448854	T	.	-	.	-
15	48509446		Csmd3	-	AAATTAAAT	.	-	.	-
15	48509461		Csmd3	rs215358289	CTAAA	.	-	.	-
15	48509575		Csmd3	rs224188153	AT	.	-	.	-
15	48509622		Csmd3	rs236096657	G	.	-	.	-
15	48509727		Csmd3	rs230907028	A	.	-	.	-
15	48509739		Csmd3	-	TG	.	-	.	-
15	48509915		Csmd3	-	A	.	-	.	-
15	48510060		Csmd3	rs235732858	A	.	-	.	-
15	48510119		Csmd3	-	CA	.	-	.	-
15	48510215		Csmd3	rs247714879	GACACTCTTAAA	.	-	.	-
15	48510615		Csmd3	-	CACACACACAAAAAA	.	-	.	-
15	48510621		Csmd3	rs248273747	CACAAA	.	-	.	-
15	48510623		Csmd3	rs31794898	C	A	nc_transcript_variant	A	nc_transcript_variant
15	48510623		Csmd3	rs262530017	CAAAAAA	.	-	.	-
15	48510633		Csmd3	-	AAAAAAC	.	-	.	-
15	48510790		Csmd3	rs263092658	A	.	-	.	-
15	48510860		Csmd3	rs255691558	A	.	-	.	-
15	48511025		Csmd3	-	CAAAT	.	-	.	-
15	48511061		Csmd3	rs218497242	A	.	-	.	-
15	48511062		Csmd3	rs252988440	G	.	-	.	-
15	48511099		Csmd3	rs257286525	AG	.	-	.	-
15	48512248		Csmd3	rs263415388	GT	.	-	.	-
15	48512732		Csmd3	rs256454309	A	.	-	.	-
15	48513227		Csmd3	-	AT	.	-	.	-
15	48513265		Csmd3	rs218554664	G	.	-	.	-
15	48513321		Csmd3	-	GA	.	-	.	-
15	48513373		Csmd3	-	ATCTTAGTTGGAGCCC	.	-	.	-
15	48513434		Csmd3	-	C	.	-	.	-
15	48514032		Csmd3	-	GAA	.	-	.	-
15	48514072		Csmd3	rs223419616	TTGTGTGTGTGTGTGTG	.	-	.	-
15	48514083		Csmd3	-	TGTGTGTGTGTGTGTGTGTGTGTGTGTGTGTGTGC	.	-	.	-
15	48514107		Csmd3	-	TGTGTGTGTGC	.	-	.	-
15	48514117		Csmd3	rs217277776	CGT	.	-	.	-
15	48514154		Csmd3	rs245927247	TA	.	-	.	-
15	48514261		Csmd3	rs262088351	TA	.	-	.	-
15	48514385		Csmd3	-	ACCT	.	-	.	-
15	48514538		Csmd3	rs228776225	CT	.	-	.	-
15	48514756		Csmd3	-	GCATATAACATTCA	.	-	.	-
15	48515430		Csmd3	rs238054791	CA	.	-	.	-
15	48515437		Csmd3	-	A	.	-	.	-
15	48516057		Csmd3	rs246465071	T	.	-	.	-
15	48516399		Csmd3	rs238347224	GT	.	-	.	-
15	48516631		Csmd3	rs257950103	CACTT	.	-	.	-
15	48517132		Csmd3	rs219278191	CA	.	-	.	-
15	48518192		Csmd3	rs219166542	A	.	-	.	-
15	48518824		Csmd3	-	CT	.	-	.	-
15	48520407		Csmd3	-	AC	.	-	.	-
15	48520859		Csmd3	-	GAAA	.	-	.	-
15	48520860		Csmd3	-	AAAT	.	-	.	-
15	48521175		Csmd3	-	A	.	-	.	-
15	48521244		Csmd3	-	CAA	.	-	.	-
15	48521649		Csmd3	-	A	.	-	.	-
15	48521818		Csmd3	-	CA	.	-	.	-
15	48521898		Csmd3	-	C	.	-	.	-
15	48521914		Csmd3	-	GA	.	-	.	-
15	48522220		Csmd3	-	AAAG	.	-	.	-
15	48522281		Csmd3	-	TA	.	-	.	-
15	48523501		Csmd3	-	C	.	-	.	-
15	48524114		Csmd3	-	A	.	-	.	-
15	48524257		Csmd3	-	TGGG	.	-	.	-
15	48524262		Csmd3	-	GGGGGGA	.	-	.	-
15	48524263		Csmd3	-	GGGGGA	.	-	.	-
15	48524325		Csmd3	rs211927836	T	.	-	.	-
15	48524333		Csmd3	rs228472217	A	.	-	.	-
15	48524341		Csmd3	rs229969008	TA	.	-	.	-
15	48524712		Csmd3	rs238285443	AAG	.	-	.	-
15	48524714		Csmd3	rs258637043	GA	.	-	.	-
15	48524760		Csmd3	rs238272443	T	.	-	.	-
15	48524865		Csmd3	rs221807010	AT	.	-	.	-
15	48525128		Csmd3	rs216805580	AAGTGTCAC	.	-	.	-
15	48525227		Csmd3	rs243162312	C	.	-	.	-
15	48525232		Csmd3	rs237954017	T	.	-	.	-
15	48525978		Csmd3	-	CACACATATATTTTGGAATATATAT	.	-	.	-
15	48525994		Csmd3	rs250355509	A	.	-	.	-
15	48526048		Csmd3	rs217159190	TATATAC	.	-	.	-
15	48526935		Csmd3	-	A	.	-	.	-
15	48527157		Csmd3	rs237038675	TA	.	-	.	-
15	48527901		Csmd3	rs249518140	ACTTTC	.	-	.	-
15	48528321		Csmd3	rs258912990;rs258587803	CAA	.	-	.	-
15	48528334		Csmd3	rs223728891	T	.	-	.	-
15	48528629		Csmd3	rs225073487	CACA	.	-	.	-
15	48528685		Csmd3	rs263783531	AT	.	-	.	-
15	48528746		Csmd3	rs215936067	TCCC	.	-	.	-
15	48528875		Csmd3	rs236427965	CATCAAGT	.	-	.	-
15	48529006		Csmd3	rs213556899	T	.	-	.	-
15	48529008		Csmd3	-	G	.	-	.	-
15	48529019		Csmd3	-	GA	.	-	.	-
15	48529500		Csmd3	rs244140352	C	.	-	.	-
15	48529529		Csmd3	rs258065745	TCACA	.	-	.	-
15	48529582		Csmd3	rs247380963	ATC	.	-	.	-
15	48530195		Csmd3	rs265556135	AT	.	-	.	-
15	48530289		Csmd3	rs258658692	G	.	-	.	-
15	48531046		Csmd3	rs216033940	GA	.	-	.	-
15	48531441		Csmd3	rs265303566	T	.	-	.	-
15	48531693		Csmd3	rs215140064	ATAAATAGTAT	.	-	.	-
15	48532016		Csmd3	rs218428960	G	.	-	.	-
15	48532166		Csmd3	-	GCCAAAAAAAAAA	.	-	.	-
15	48532167		Csmd3	rs217474048	CCAAAAAAAAAA	.	-	.	-
15	48532175		Csmd3	-	AAAAAAAAAAAAAAAAAAAAAAAAAC	.	-	.	-
15	48532176		Csmd3	-	AAAAAAAAAAAAAAAAAAAAAAAAC	.	-	.	-
15	48532427		Csmd3	rs258927630	CT	.	-	.	-
15	48533138		Csmd3	rs258395255	TG	.	-	.	-
15	48533298		Csmd3	rs217871210	TG	.	-	.	-
15	48533382		Csmd3	rs229470914	G	.	-	.	-
15	48533418		Csmd3	rs249450924	C	.	-	.	-
15	48533647		Csmd3	rs225863013	ATCTCTCTCTCTCTC	.	-	.	-
15	48533659		Csmd3	-	CTCTCTGTG	.	-	.	-
15	48533663		Csmd3	rs238087495	CTG	.	-	.	-
15	48533702		Csmd3	rs218484423	T	.	-	.	-
15	48534184		Csmd3	rs220756748	TA	.	-	.	-
15	48534188		Csmd3	rs223757544	A	.	-	.	-
15	48534191		Csmd3	rs214987315	A	.	-	.	-
15	48534426		Csmd3	rs262305128	T	.	-	.	-
15	48534435		Csmd3	-	AAGAC	.	-	.	-
15	48534436		Csmd3	rs225913053	AGAC	.	-	.	-
15	48534446		Csmd3	-	AAAAAAAAAAAAG	.	-	.	-
15	48534453		Csmd3	-	A	.	-	.	-
15	48534494		Csmd3	rs223575382	G	.	-	.	-
15	48534731		Csmd3	rs257077536	TC	.	-	.	-
15	48535366		Csmd3	rs211711024	A	.	-	.	-
15	48535482		Csmd3	rs236022680	A	.	-	.	-
15	48535488		Csmd3	-	G	.	-	.	-
15	48535537		Csmd3	-	A	.	-	.	-
15	48535612		Csmd3	rs242345421	A	.	-	.	-
15	48535779		Csmd3	rs222245291	C	.	-	.	-
15	48536051		Csmd3	rs228486330	GT	.	-	.	-
15	48536111		Csmd3	rs241040586	A	.	-	.	-
15	48536140		Csmd3	rs261825474	C	.	-	.	-
15	48536192		Csmd3	rs241100002	C	.	-	.	-
15	48536348		Csmd3	-	CCATGTGTATTCTTTGACTGGTGGCT	.	-	.	-
15	48536459		Csmd3	rs214218685	GTTTTTGTGTGTTTTTTTTTTTTTTTTTTTTTT	.	-	.	-
15	48536653		Csmd3	rs247768577	TCA	.	-	.	-
15	48536759		Csmd3	rs244379124	GA	.	-	.	-
15	48536955		Csmd3	rs245625285	A	.	-	.	-
15	48536965		Csmd3	rs225943926	TAAAAA	.	-	.	-
15	48536975		Csmd3	rs264427674	AAAAAC	.	-	.	-
15	48537008		Csmd3	-	AG	.	-	.	-
15	48537178		Csmd3	rs226349222	ATACG	.	-	.	-
15	48537194		Csmd3	rs213505929	A	.	-	.	-
15	48537228		Csmd3	rs257687171	TTTAC	.	-	.	-
15	48537515		Csmd3	-	TGATACCACACACA	.	-	.	-
15	48538557		Csmd3	rs245311866	CATT	.	-	.	-
15	48538854		Csmd3	rs230790411	G	.	-	.	-
15	48538985		Csmd3	rs254362291	AG	.	-	.	-
15	48538989		Csmd3	rs250831809	G	.	-	.	-
15	48539748		Csmd3	-	TG	.	-	.	-
15	48540273		Csmd3	-	GT	.	-	.	-
15	48540282		Csmd3	rs227849071	CAATTTCTTTTT	.	-	.	-
15	48540600		Csmd3	rs232837233	ATTG	.	-	.	-
15	48541817		Csmd3	rs236877772	A	.	-	.	-
15	48541828		Csmd3	rs237171078	TGTGTG	.	-	.	-
15	48541839		Csmd3	-	G	.	-	.	-
15	48542210		Csmd3	rs214895473	TTTTGATATG	.	-	.	-
15	48542441		Csmd3	rs250188294	G	.	-	.	-
15	48542693		Csmd3	-	CT	.	-	.	-
15	48542694		Csmd3	rs233167804	TG	.	-	.	-
15	48542894		Csmd3	rs240878614	C	.	-	.	-
15	48543264		Csmd3	rs240242892	GT	.	-	.	-
15	48543363		Csmd3	rs249599154	C	.	-	.	-
15	48543368		Csmd3	-	C	.	-	.	-
15	48543553		Csmd3	rs245152367	CA	.	-	.	-
15	48543645		Csmd3	rs243400172	ATGGTCTGATCTGGTGCCTC	.	-	.	-
15	48543965		Csmd3	rs237357603;rs212219328	TA	.	-	.	-
15	48544033		Csmd3	rs238966151	C	.	-	.	-
15	48544298		Csmd3	rs239332188	CTT	.	-	.	-
15	48544394		Csmd3	rs226770215	T	.	-	.	-
15	48544601		Csmd3	rs252990841	AT	.	-	.	-
15	48545545		Csmd3	rs253350293	CT	.	-	.	-
15	48545641		Csmd3	rs242526025	AT	.	-	.	-
15	48545642		Csmd3	rs242019850;rs230741303	TAA	.	-	.	-
15	48545653		Csmd3	rs262329341	A	.	-	.	-
15	48545744		Csmd3	rs252052233	TAA	.	-	.	-
15	48545764		Csmd3	-	T	.	-	.	-
15	48546290		Csmd3	rs216832603	TC	.	-	.	-
15	48547295		Csmd3	rs217590309	T	.	-	.	-
15	48547397		Csmd3	rs221392532	T	.	-	.	-
15	48547492		Csmd3	rs259319169	A	.	-	.	-
15	48547680		Csmd3	-	TCCCAC	.	-	.	-
15	48547953		Csmd3	rs224139014	AAT	.	-	.	-
15	48547954		Csmd3	rs224139014	A	.	-	.	-
15	48548074		Csmd3	rs241315804	A	.	-	.	-
15	48548075		Csmd3	rs230974895	T	.	-	.	-
15	48548126		Csmd3	-	CACATTCAACTT	.	-	.	-
15	48548291		Csmd3	rs226761942	T	.	-	.	-
15	48548868		Csmd3	rs216816629	CT	.	-	.	-
15	48548993		Csmd3	-	ATGTGTG	.	-	.	-
15	48549003		Csmd3	-	GTA	.	-	.	-
15	48549097		Csmd3	rs225535841	T	.	-	.	-
15	48549160		Csmd3	rs236278773	A	.	-	.	-
15	48549389		Csmd3	rs253440340	A	.	-	.	-
15	48549395		Csmd3	-	T	.	-	.	-
15	48549887		Csmd3	-	TCAGTAATTAAGACAATTAAGA	.	-	.	-
15	48549943		Csmd3	rs258004449	CA	.	-	.	-
15	48550035		Csmd3	rs213632463	CAT	.	-	.	-
15	48550359		Csmd3	-	GCTAATAGTTTCACTGTTTTTGTCTTTTAATATCTAAGTGAA	.	-	.	-
15	48550637		Csmd3	rs261165880	GCACACACA	.	-	.	-
15	48550654		Csmd3	rs252570198	CACACACACACACACACAT	.	-	.	-
15	48550682		Csmd3	-	CAT	.	-	.	-
15	48550692		Csmd3	-	T	.	-	.	-
15	48550992		Csmd3	rs223336685	C	.	-	.	-
15	48552099		Csmd3	rs243563469	CT	.	-	.	-
15	48552212		Csmd3	-	C	.	-	.	-
15	48552238		Csmd3	-	T	.	-	.	-
15	48552431		Csmd3	rs219262012	GTTCAAGGAC	.	-	.	-
15	48552814		Csmd3	-	G	.	-	.	-
15	48553171		Csmd3	rs228641271	CTT	.	-	.	-
15	48553305		Csmd3	rs239647862	AAT	.	-	.	-
15	48554483		Csmd3	-	C	.	-	.	-
15	48555350		Csmd3	rs258320483	C	.	-	.	-
15	48555582		Csmd3	rs255747910	AT	.	-	.	-
15	48555788		Csmd3	rs212465346	T	.	-	.	-
15	48556513		Csmd3	rs260959163	A	.	-	.	-
15	48556640		Csmd3	rs238192221	C	.	-	.	-
15	48556650		Csmd3	rs227850085	CTT	.	-	.	-
15	48558339		Csmd3	rs239506455	C	.	-	.	-
15	48558589		Csmd3	-	TAAAAC	.	-	.	-
15	48558592		Csmd3	-	AAC	.	-	.	-
15	48558618		Csmd3	-	A	.	-	.	-
15	48558631		Csmd3	-	A	.	-	.	-
15	48558634		Csmd3	-	C	.	-	.	-
15	48558636		Csmd3	-	AC	.	-	.	-
15	48558640		Csmd3	rs258321150	C	.	-	.	-
15	48558641		Csmd3	rs235207192	A	.	-	.	-
15	48558642		Csmd3	-	A	.	-	.	-
15	48558649		Csmd3	-	A	.	-	.	-
15	48558687		Csmd3	rs248267396	CT	.	-	.	-
15	48558743		Csmd3	rs245124166	A	.	-	.	-
15	48558822		Csmd3	rs249909874	A	.	-	.	-
15	48558860		Csmd3	rs264367239	G	.	-	.	-
15	48559049		Csmd3	rs263992782	CAAAA	.	-	.	-
15	48559090		Csmd3	-	ATGTGTTTGTGTGTGTGTATGTGTGTG	.	-	.	-
15	48559096		Csmd3	-	TTGTGTGTGTGTATGTGTG	.	-	.	-
15	48559145		Csmd3	-	T	.	-	.	-
15	48559414		Csmd3	rs212048551	CACACAT	.	-	.	-
15	48559426		Csmd3	rs260817101	TAC	.	-	.	-
15	48559435		Csmd3	-	ATG	.	-	.	-
15	48559437		Csmd3	rs214081608	GCACACACACACA	.	-	.	-
15	48559656		Csmd3	rs215001646	TG	.	-	.	-
15	48559658		Csmd3	rs224319312	TA	.	-	.	-
15	48559665		Csmd3	rs230246167	AT	.	-	.	-
15	48560285		Csmd3	rs226051952	C	.	-	.	-
15	48560732		Csmd3	rs230432336	C	.	-	.	-
15	48560753		Csmd3	-	T	.	-	.	-
15	48561228		Csmd3	rs248416802	C	.	-	.	-
15	48561627		Csmd3	rs229584489	A	.	-	.	-
15	48561776		Csmd3	rs246688675;rs237508107	TA	.	-	.	-
15	48562216		Csmd3	rs243347063	AAAG	.	-	.	-
15	48562225		Csmd3	-	GA	.	-	.	-
15	48562230		Csmd3	-	GAT	.	-	.	-
15	48562673		Csmd3	rs260326414	AAGC	.	-	.	-
15	48563293		Csmd3	rs213912759	GA	.	-	.	-
15	48563432		Csmd3	rs233948386	TA	.	-	.	-
15	48563571		Csmd3	rs265696807	AGTGATATAGGTAAG	.	-	.	-
15	48563623		Csmd3	rs258129021	A	.	-	.	-
15	48563719		Csmd3	rs229254858	G	.	-	.	-
15	48563828		Csmd3	rs243078487	G	.	-	.	-
15	48564390		Csmd3	rs237842776	GGAGAATAA	.	-	.	-
15	48564779		Csmd3	rs243928301	TTTATTATTATTATTATTATTATTA	.	-	.	-
15	48564782		Csmd3	-	A	.	-	.	-
15	48564984		Csmd3	rs247983965;rs230060523	CTTCATTCA	.	-	.	-
15	48565012		Csmd3	-	A	.	-	.	-
15	48565019		Csmd3	-	C	.	-	.	-
15	48565163		Csmd3	rs218513647	ATGTC	.	-	.	-
15	48565790		Csmd3	rs265358054	TA	.	-	.	-
15	48565852		Csmd3	rs260547584	CT	.	-	.	-
15	48565899		Csmd3	rs217066808	AC	.	-	.	-
15	48566017		Csmd3	rs221540758	A	.	-	.	-
15	48566388		Csmd3	rs244617905	A	.	-	.	-
15	48566786		Csmd3	-	A	.	-	.	-
15	48566813		Csmd3	rs264893438	AT	.	-	.	-
15	48566986		Csmd3	rs215058641	A	.	-	.	-
15	48567027		Csmd3	rs219911813	T	.	-	.	-
15	48567196		Csmd3	rs265448928	GAA	.	-	.	-
15	48567401		Csmd3	rs228412702	AT	.	-	.	-
15	48567519		Csmd3	rs215115998	TTACC	.	-	.	-
15	48567902		Csmd3	rs213686077	TA	.	-	.	-
15	48568090		Csmd3	rs249293981;rs213328970	AT	.	-	.	-
15	48568191		Csmd3	-	CTACCCCTGCTCCCAAACCCACCCA	.	-	.	-
15	48568277		Csmd3	rs239266216	GCC	.	-	.	-
15	48568598		Csmd3	rs220069765;rs254722555	GT	.	-	.	-
15	48568699		Csmd3	rs226868191	AG	.	-	.	-
15	48568701		Csmd3	rs214554755	GGT	.	-	.	-
15	48568702		Csmd3	rs214554755;rs220935848	GT	.	-	.	-
15	48568711		Csmd3	-	TG	.	-	.	-
15	48569142		Csmd3	rs243972612	TGCCTTTAATCCCA	.	-	.	-
15	48569258		Csmd3	-	GAAAATTAAAAAAAAAAAAAA	.	-	.	-
15	48569264		Csmd3	rs260280600	T	.	-	.	-
15	48570291		Csmd3	-	T	.	-	.	-
15	48570361		Csmd3	rs232413622	A	.	-	.	-
15	48570907		Csmd3	rs259926267	A	.	-	.	-
15	48571252		Csmd3	rs229820238	T	.	-	.	-
15	48571801		Csmd3	rs222438503	CT	.	-	.	-
15	48572138		Csmd3	rs234054032	AC	.	-	.	-
15	48572405		Csmd3	rs241037726;rs245853657	AT	.	-	.	-
15	48572424		Csmd3	-	AT	.	-	.	-
15	48573848		Csmd3	rs245607797	TTTTAA	.	-	.	-
15	48573918		Csmd3	rs262365831	C	.	-	.	-
15	48573926		Csmd3	rs233998249	T	.	-	.	-
15	48574077		Csmd3	rs212353536	C	.	-	.	-
15	48574558		Csmd3	rs228394751	G	.	-	.	-
15	48574578		Csmd3	rs248341782	TTA	.	-	.	-
15	48574892		Csmd3	rs243379320	TCTGA	.	-	.	-
15	48574956		Csmd3	rs241772892	GAAA	.	-	.	-
15	48574964		Csmd3	rs254876632	A	.	-	.	-
15	48574967		Csmd3	-	AAAG	.	-	.	-
15	48575289		Csmd3	rs221377797	GAA	.	-	.	-
15	48575521		Csmd3	rs264404348	A	.	-	.	-
15	48575536		Csmd3	-	TACACACACACACATACACACACACACACACAC	.	-	.	-
15	48575540		Csmd3	-	CACACACACAT	.	-	.	-
15	48575550		Csmd3	rs257157873	T	.	-	.	-
15	48575571		Csmd3	-	A	.	-	.	-
15	48575580		Csmd3	-	CACACAG	.	-	.	-
15	48577080		Csmd3	rs225415145	A	.	-	.	-
15	48577085		Csmd3	-	GAGGAT	.	-	.	-
15	48577162		Csmd3	-	A	.	-	.	-
15	48577164		Csmd3	rs230950649	T	.	-	.	-
15	48577554		Csmd3	rs216953533	A	.	-	.	-
15	48578280		Csmd3	rs261242350	G	.	-	.	-
15	48578287		Csmd3	rs251658105	AAG	.	-	.	-
15	48578376		Csmd3	rs218358124	AT	.	-	.	-
15	48578459		Csmd3	rs221764090	AAT	.	-	.	-
15	48578688		Csmd3	rs250363781	TTTGTTTCC	.	-	.	-
15	48578850		Csmd3	rs230995281	T	.	-	.	-
15	48579004		Csmd3	rs245609692	ATT	.	-	.	-
15	48579137		Csmd3	rs263399109	T	.	-	.	-
15	48579215		Csmd3	rs215532138	ATG	.	-	.	-
15	48579219		Csmd3	rs229507644;rs249783702	GTATA	.	-	.	-
15	48579238		Csmd3	-	A	~	-	t	nc_transcript_variant
15	48579253		Csmd3	-	GTATATATA	.	-	.	-
15	48579288		Csmd3	-	C	T	nc_transcript_variant	-	-
15	48579723		Csmd3	rs212188629	GCACAC	.	-	.	-
15	48579766		Csmd3	rs237840198	AT	.	-	.	-
15	48579773		Csmd3	-	CAGAG	cagagag	nc_transcript_variant	.	-
15	48579798		Csmd3	-	A	.	-	.	-
15	48579822		Csmd3	-	T	A	nc_transcript_variant	-	-
15	48579825		Csmd3	-	G	.	-	.	-
15	48579856		Csmd3	-	AGAG	.	-	.	-
15	48579871		Csmd3	rs237205406	G	.	-	.	-
15	48580306		Csmd3	-	A	.	-	.	-
15	48581046		Csmd3	rs240470629	G	.	-	.	-
15	48582458		Csmd3	rs223866348	ATAGGAGGTGTTCCCTCCC	.	-	.	-
15	48582712		Csmd3	rs264626715;rs230568935	TTG	.	-	.	-
15	48582996		Csmd3	rs237811260	G	.	-	.	-
15	48583049		Csmd3	rs230135481	A	.	-	.	-
15	48583075		Csmd3	-	ATATAT	.	-	.	-
15	48583353		Csmd3	rs226546534	ACTC	.	-	.	-
15	48584740		Csmd3	rs244317341	A	.	-	.	-
15	48584745		Csmd3	rs242766277	TTTTTC	.	-	.	-
15	48584749		Csmd3	rs250159774	T	.	-	.	-
15	48584859		Csmd3	rs249461481	AT	.	-	.	-
15	48584980		Csmd3	-	TATTTATC	.	-	.	-
15	48585056		Csmd3	-	TCAGA	.	-	.	-
15	48585265		Csmd3	rs232160938	A	.	-	.	-
15	48585287		Csmd3	rs251645134	A	.	-	.	-
15	48585420		Csmd3	rs215961618	AT	.	-	.	-
15	48585574		Csmd3	rs222638237	A	.	-	.	-
15	48585891		Csmd3	rs257519080	GA	.	-	.	-
15	48586070		Csmd3	rs222627054;rs242815430	AT	.	-	.	-
15	48586072		Csmd3	rs262421516	T	.	-	.	-
15	48586422		Csmd3	rs258664071	T	.	-	.	-
15	48586485		Csmd3	rs216067603	C	.	-	.	-
15	48587319		Csmd3	rs222931448	G	.	-	.	-
15	48587596		Csmd3	rs235398655	AGTTTTT	.	-	.	-
15	48587603		Csmd3	rs252360878;rs220777819	GTTT	GTTTT	nc_transcript_variant	.	-
15	48587758		Csmd3	rs32423954	A	C	nc_transcript_variant	-	-
15	48587878		Csmd3	rs220691894	TGTGTATG	.	-	.	-
15	48588043		Csmd3	rs245252112	C	.	-	.	-
15	48588074		Csmd3	rs52700175	T	C	nc_transcript_variant	-	-
15	48588376		Csmd3	rs228112490	CT	.	-	.	-
15	48589486		Csmd3	rs237353238	ATATG	.	-	.	-
15	48589651		Csmd3	-	GA	.	-	.	-
15	48589933		Csmd3	rs251843036	AT	.	-	.	-
15	48590104		Csmd3	-	AAT	.	-	.	-
15	48590127		Csmd3	rs221239463	CAA	.	-	.	-
15	48590345		Csmd3	rs240583445	A	.	-	.	-
15	48591174		Csmd3	-	A	.	-	.	-
15	48591176		Csmd3	rs264877427	TA	.	-	.	-
15	48591208		Csmd3	-	ACATCAGTGCAAGGCGCAT	.	-	.	-
15	48591536		Csmd3	rs256192470	C	.	-	.	-
15	48591546		Csmd3	rs239283460	T	.	-	.	-
15	48591907		Csmd3	rs265964828	A	.	-	.	-
15	48592046		Csmd3	rs31693779	T	C	nc_transcript_variant	-	-
15	48592062		Csmd3	rs255332656	TA	.	-	.	-
15	48592148		Csmd3	rs265051237	CTGT	.	-	.	-
15	48592485		Csmd3	rs211828733	AT	.	-	.	-
15	48592946		Csmd3	rs225219521	G	.	-	.	-
15	48593057		Csmd3	rs252571774	TCAAA	.	-	.	-
15	48593324		Csmd3	rs222703673	AC	.	-	.	-
15	48593396		Csmd3	rs222274579	GTT	.	-	.	-
15	48593398		Csmd3	rs215443266	TA	.	-	.	-
15	48593475		Csmd3	-	T	.	-	.	-
15	48593477		Csmd3	-	G	.	-	.	-
15	48593492		Csmd3	rs233701220	G	A	nc_transcript_variant	-	-
15	48593869		Csmd3	rs243010457	T	.	-	.	-
15	48594536		Csmd3	rs265297517	CTTT	.	-	.	-
15	48594681		Csmd3	rs229247089;rs230685965	TAA	.	-	.	-
15	48594821		Csmd3	rs257655634;rs219862661	GT	.	-	.	-
15	48594986		Csmd3	rs250254157;rs221366648	TAA	TAAA	nc_transcript_variant	.	-
15	48595035		Csmd3	rs221324085	AAAG	.	-	.	-
15	48595388		Csmd3	rs244206869	T	.	-	.	-
15	48595765		Csmd3	rs230807093	C	.	-	.	-
15	48595836		Csmd3	rs229247541	CA	.	-	.	-
15	48595881		Csmd3	-	AG	.	-	.	-
15	48596051		Csmd3	rs246158031	A	.	-	.	-
15	48596158		Csmd3	rs235370999	CT	.	-	.	-
15	48597114		Csmd3	rs245576929	ATTAAG	.	-	.	-
15	48597399		Csmd3	rs220214430	AT	.	-	.	-
15	48597495		Csmd3	rs260573355	C	.	-	.	-
15	48597518		Csmd3	rs240460409	CTT	ctttttt/cttttt*	nc_transcript_variant feature_elongation	.	-
15	48597521		Csmd3	-	TTTTTTTTTCCTTTTAGTTTTAGTGA	.	-	.	-
15	48597528		Csmd3	rs233697145	TTC	.	-	.	-
15	48597529		Csmd3	-	T	TTTTTC*	nc_transcript_variant feature_elongation	.	-
15	48597832		Csmd3	rs235324189	T	.	-	.	-
15	48598066		Csmd3	rs253294841	TC	.	-	.	-
15	48598146		Csmd3	rs262925879	AC	.	-	.	-
15	48598156		Csmd3	-	AGAG	.	-	.	-
15	48598186		Csmd3	-	AG	.	-	.	-
15	48598639		Csmd3	-	GCA	.	-	.	-
15	48598642		Csmd3	rs235160685	CA	.	-	.	-
15	48598778		Csmd3	-	TACTATG	.	-	.	-
15	48598859		Csmd3	rs265351854;rs219518241	AAT	.	-	.	-
15	48599146		Csmd3	-	TGGGG	TG	nc_transcript_variant	.	-
15	48599154		Csmd3	-	GGGGA	.	-	.	-
15	48599155		Csmd3	-	GGGA	.	-	.	-
15	48599157		Csmd3	-	GA	.	-	.	-
15	48599214		Csmd3	rs238471073	T	.	-	.	-
15	48599471		Csmd3	rs247247321	C	.	-	.	-
15	48599564		Csmd3	rs261996273	A	.	-	.	-
15	48599576		Csmd3	rs250065543	CAT	.	-	.	-
15	48599604		Csmd3	rs215152012	TGTAA	.	-	.	-
15	48600284		Csmd3	rs257465909	G	.	-	.	-
15	48600440		Csmd3	rs235951218	T	.	-	.	-
15	48601122		Csmd3	rs247993026	TATAGCCCTTG	.	-	.	-
15	48601166		Csmd3	rs239142234	A	.	-	.	-
15	48601253		Csmd3	rs262292819	ATAACT	.	-	.	-
15	48601268		Csmd3	-	ATGTGTGTTTGTGTGTGTGTG	.	-	.	-
15	48601276		Csmd3	rs266109944	TTGTGTGTGTGTGTGTGTGTG	TTGTGTGTGTGTGTGTG	nc_transcript_variant	.	-
15	48601334		Csmd3	-	A	.	-	.	-
15	48601594		Csmd3	rs256648308	G	.	-	.	-
15	48601780		Csmd3	rs256678586	GTC	.	-	.	-
15	48601784		Csmd3	rs250700782	CT	.	-	.	-
15	48601869		Csmd3	rs233743711;rs219606479	GA	.	-	.	-
15	48602095		Csmd3	rs233344666	C	.	-	.	-
15	48602836		Csmd3	rs227406626	C	.	-	.	-
15	48603190		Csmd3	-	CATATCATACAT	.	-	.	-
15	48603547		Csmd3	rs264837049	TA	.	-	.	-
15	48604547		Csmd3	rs241842119	TG	.	-	.	-
15	48604939		Csmd3	rs251561562	AGGAGGGATGGGG	.	-	.	-
15	48604992		Csmd3	rs246844520	GC	.	-	.	-
15	48605083		Csmd3	rs232879292	G	.	-	.	-
15	48605575		Csmd3	rs264257659	AAC	.	-	.	-
15	48605858		Csmd3	rs235554985	GATAA	G*	nc_transcript_variant feature_truncation	.	-
15	48606654		Csmd3	rs218110279	G	.	-	.	-
15	48607876		Csmd3	rs32514074	G	A	nc_transcript_variant	-	-
15	48607887		Csmd3	rs211771549	T	.	-	.	-
15	48608511		Csmd3	rs241877837	CATCTTGCA	.	-	.	-
15	48608692		Csmd3	rs260560769	AG	.	-	.	-
15	48608701		Csmd3	rs233794310	AT	.	-	.	-
15	48608803		Csmd3	rs249535849	TC	.	-	.	-
15	48608930		Csmd3	rs261273745	C	.	-	.	-
15	48609232		Csmd3	-	GA	.	-	.	-
15	48609519		Csmd3	rs214489306	C	.	-	.	-
15	48609873		Csmd3	rs226142734	AGTTAGG	.	-	.	-
15	48610656		Csmd3	rs259695470	TTAAAG	.	-	.	-
15	48610685		Csmd3	rs31984665	A	T	nc_transcript_variant	-	-
15	48610982		Csmd3	rs256302462	G	.	-	.	-
15	48610991		Csmd3	rs256341571	ATACG	.	-	.	-
15	48610992		Csmd3	-	T	C	nc_transcript_variant	-	-
15	48611342		Csmd3	rs212691376	AATGATGATGATGATGATGATG	.	-	.	-
15	48611345		Csmd3	-	G	A	nc_transcript_variant	-	-
15	48611449		Csmd3	rs49259890	G	A	nc_transcript_variant	-	-
15	48611463		Csmd3	rs251178892	T	.	-	.	-
15	48611533		Csmd3	rs248141968	TGCACGCACACACAC	.	-	.	-
15	48611534		Csmd3	-	G	.	-	.	-
15	48611962		Csmd3	rs232869950	G	.	-	.	-
15	48612122		Csmd3	rs240079227	GTAAC	.	-	.	-
15	48612470		Csmd3	-	TCGATAAAAGTGCTTC	.	-	.	-
15	48612550		Csmd3	rs244159270;rs237957211	TAA	.	-	.	-
15	48612592		Csmd3	rs230808927	CTG	.	-	.	-
15	48613202		Csmd3	rs257285707	TTCAAATGTTA	.	-	.	-
15	48613796		Csmd3	rs31995830	G	T	nc_transcript_variant	-	-
15	48613863		Csmd3	rs245512323	C	.	-	.	-
15	48613914		Csmd3	rs244271057	GAT	G*	nc_transcript_variant feature_truncation	.	-
15	48613975		Csmd3	rs214292267	TG	.	-	.	-
15	48614120		Csmd3	rs233892054	CA	.	-	.	-
15	48614207		Csmd3	rs258462625	AGTT	.	-	.	-
15	48614235		Csmd3	rs264532212	G	.	-	.	-
15	48614384		Csmd3	rs227862993	CT	.	-	.	-
15	48614405		Csmd3	-	CTTT	.	-	.	-
15	48614427		Csmd3	rs248344125;rs218969507	CTTTT	CT	nc_transcript_variant	.	-
15	48614442		Csmd3	-	TTTC	.	-	.	-
15	48614444		Csmd3	rs250200050	T	.	-	.	-
15	48614890		Csmd3	rs227670314	CA	.	-	.	-
15	48614962		Csmd3	rs225647155	GA	.	-	.	-
15	48615370		Csmd3	rs215997104	AT	.	-	.	-
15	48616044		Csmd3	rs229718807	A	.	-	.	-
15	48616045		Csmd3	rs233937041	A	AT*	nc_transcript_variant feature_elongation	.	-
15	48616432		Csmd3	rs258524253;rs216009210	AT	ATT*	nc_transcript_variant feature_elongation	.	-
15	48616467		Csmd3	rs242591584	G	.	-	.	-
15	48616657		Csmd3	rs49059756	G	A	nc_transcript_variant	-	-
15	48616686		Csmd3	rs32075194	G	T	nc_transcript_variant	-	-
15	48617281		Csmd3	rs31640623	T	C	nc_transcript_variant	-	-
15	48617331		Csmd3	rs32210828	G	A	nc_transcript_variant	-	-
15	48617422		Csmd3	rs31576814	T	C	nc_transcript_variant	-	-
15	48617757		Csmd3	rs48197564	A	G	nc_transcript_variant	-	-
15	48618161		Csmd3	-	C	.	-	.	-
15	48618205		Csmd3	-	CACAGGT	.	-	.	-
15	48618222		Csmd3	rs257703894	GA	.	-	.	-
15	48618547		Csmd3	rs49661399	G	A	nc_transcript_variant	-	-
15	48618560		Csmd3	rs31906997	T	C	nc_transcript_variant	-	-
15	48618829		Csmd3	rs219458146	C	.	-	.	-
15	48618980		Csmd3	rs222031879	T	.	-	.	-
15	48618990		Csmd3	-	C	.	-	.	-
15	48619024		Csmd3	rs223525210	CG	.	-	.	-
15	48619190		Csmd3	rs32272893	T	C	nc_transcript_variant	-	-
15	48619365		Csmd3	rs223271363	ACAGGGC	A*	nc_transcript_variant feature_truncation	.	-
15	48619425		Csmd3	rs254497083	AAC	.	-	.	-
15	48619472		Csmd3	rs242201248	A	.	-	.	-
15	48619563		Csmd3	-	A	.	-	.	-
15	48619587		Csmd3	rs46181940	T	A	nc_transcript_variant	-	-
15	48619783		Csmd3	rs31863647	A	G	nc_transcript_variant	-	-
15	48619947		Csmd3	rs31973307	G	A	nc_transcript_variant	-	-
15	48620027		Csmd3	rs234731367	G	.	-	.	-
15	48620065		Csmd3	rs237324291	A	C	nc_transcript_variant	-	-
15	48620097		Csmd3	rs31923039	C	G	nc_transcript_variant	-	-
15	48620219		Csmd3	rs238011630	A	.	-	.	-
15	48620341		Csmd3	-	TCC	.	-	.	-
15	48620447		Csmd3	rs257709097	TCC	.	-	.	-
15	48620449		Csmd3	rs238363806	CCCCCT	.	-	.	-
15	48620450		Csmd3	rs235692993	C	t	nc_transcript_variant	-	-
15	48620451		Csmd3	rs245204301;rs222782533	CCCT	cttcct/ctttcct	nc_transcript_variant	.	-
15	48620452		Csmd3	rs260768939	C	t	nc_transcript_variant	-	-
15	48620453		Csmd3	rs226062971	C	t	nc_transcript_variant	-	-
15	48620581		Csmd3	rs233503965	A	.	-	.	-
15	48620859		Csmd3	rs211957901	CA	C*	nc_transcript_variant feature_truncation	.	-
15	48620874		Csmd3	rs244526411	AACAAACAAAC	.	-	.	-
15	48620881		Csmd3	rs235781879	AAAC	.	-	.	-
15	48620884		Csmd3	rs215956316	CAAA	.	-	.	-
15	48620889		Csmd3	-	A	G	nc_transcript_variant	-	-
15	48620998		Csmd3	rs247681207	ATGCAAGT	.	-	.	-
15	48621013		Csmd3	rs6256433	G	A	nc_transcript_variant	-	-
15	48621015		Csmd3	rs254820223	T	.	-	.	-
15	48621420		Csmd3	rs249656309	CCTT	.	-	.	-
15	48621774		Csmd3	rs244561125	TACACACACACACACACACACAC	tacacacacacacacacacacacacac/tacacacacacacacacacacacacacac	nc_transcript_variant	.	-
15	48622127		Csmd3	rs235471346	A	.	-	.	-
15	48622243		Csmd3	rs256824056	G	C	nc_transcript_variant	-	-
15	48622625		Csmd3	rs251773283	A	.	-	.	-
15	48622645		Csmd3	rs262878989	A	.	-	.	-
15	48622874		Csmd3	rs213582553;rs226582939	TAA	TAAA	nc_transcript_variant	.	-
15	48622946		Csmd3	-	TTAA	T*	nc_transcript_variant feature_truncation	.	-
15	48622947		Csmd3	rs261706791	TAAA	.	-	.	-
15	48624048		Csmd3	rs32172671	G	A	upstream_gene_variant	-	-
15	48624106		Csmd3	rs225146414;rs218147830	TA	.	-	.	-
15	48624211		Csmd3	rs235696852;rs238134080	CTTTT	cttttttttttt	upstream_gene_variant	.	-
15	48624228		Csmd3	-	TTTA	.	-	.	-
15	48624230		Csmd3	rs241473335	TA	TTTTTTTTTA	upstream_gene_variant	.	-
15	48624581		Csmd3	rs264283325;rs242428214	AT	A	upstream_gene_variant	.	-
15	48624739		Csmd3	rs238409644	T	.	-	.	-
15	48624748		Csmd3	rs50743853	T	C	upstream_gene_variant	-	-
15	48624858		Csmd3	rs241796255	A	.	-	.	-
15	48625171		Csmd3	rs50549845	G	A	upstream_gene_variant	-	-
15	48625191		Csmd3	rs263601236;rs257657430	GT	.	-	.	-
15	48625195		Csmd3	rs226458534	T	TTTG	upstream_gene_variant	.	-
15	48625239		Csmd3	-	CATGTGTGTGT	C	upstream_gene_variant	.	-
15	48625240		Csmd3	rs257317142	ATGTGTGTGTG	.	-	.	-
15	48625260		Csmd3	-	GTGTGTGTGT	.	-	.	-
15	48625269		Csmd3	-	TGAGA	.	-	.	-
15	48625317		Csmd3	rs256585349	AAC	.	-	.	-
15	48625486		Csmd3	rs31835656	A	G	upstream_gene_variant	-	-
15	48625717		Csmd3	rs32015272	A	G	upstream_gene_variant	-	-
15	48625767		Csmd3	rs255452992	T	TA	upstream_gene_variant	.	-
15	48625831		Csmd3	rs248533896	T	.	-	.	-
15	48625973		Csmd3	rs244943365	G	GA	upstream_gene_variant	.	-
15	48625981		Csmd3	rs256258561	AAAAAC	.	-	.	-
15	48625983		Csmd3	rs216787004	AAAC	.	-	.	-
15	48626038		Csmd3	rs31719777	A	C	upstream_gene_variant	-	-
15	48626238		Csmd3	rs32460240	C	G	upstream_gene_variant	-	-
15	48626314		Csmd3	rs260086688	G	.	-	.	-
15	48626500		Csmd3	rs219275767	C	T	upstream_gene_variant	-	-
15	48626747		Csmd3	rs250291971	AT	.	-	.	-
15	48626976		Csmd3	rs227188811	T	TA	upstream_gene_variant	.	-
15	48626987		Csmd3	rs31856812	T	G	upstream_gene_variant	-	-
15	48627085		Csmd3	rs32249914	A	G	upstream_gene_variant	-	-
15	48627131		Csmd3	rs31966199	G	A	upstream_gene_variant	-	-
15	48627327		Csmd3	rs220741493	G	GTTAA	upstream_gene_variant	.	-
15	48627358		Csmd3	rs224480436	CTG	.	-	.	-
15	48627504		Csmd3	rs260273444	A	.	-	.	-
15	48627772		Csmd3	rs217343184	TG	.	-	.	-
15	48627964		Csmd3	rs243506132	CAG	.	-	.	-
15	48628368		Csmd3	rs252797585	T	.	-	.	-
15	48628489		Csmd3	-	T	.	-	.	-
15	48628491		Csmd3	rs211947208	C	.	-	.	-
15	48628506		Csmd3	rs224557640	G	GTTT	upstream_gene_variant	.	-
15	48628514		Csmd3	rs235937206	T	TTTT	upstream_gene_variant	.	-
15	48676730	48677043					deletion	-
15	48733836		U6	rs225428974	A	.	-	.	-
15	48733875		U6	rs32504711	C	T	downstream_gene_variant	-	-
15	48734491		U6	rs31771644	A	G	downstream_gene_variant	-	-
15	48734682		U6	rs228709462	AC	.	-	.	-
15	48734804		U6	rs246454620	T	.	-	.	-
15	48734808		U6	rs249703091	AT	.	-	.	-
15	48734979		U6	rs231959617	TCAGAG	.	-	.	-
15	48735489		U6	-	A	.	-	.	-
15	48735490		U6	rs255003862	TCACACACACACACACA	tcacacacacacaca	downstream_gene_variant	.	-
15	48735517		U6	-	CACACACACACACACACAG	.	-	.	-
15	48735527		U6	-	CACACACAG	.	-	.	-
15	48735529		U6	-	CACACAG	C	downstream_gene_variant	.	-
15	48735551		U6	-	GAGAGAGAGAGAC	.	-	.	-
15	48735555		U6	-	GAGAGAGAC	.	-	.	-
15	48735557		U6	-	GAGAGAC	.	-	.	-
15	48735587		U6	-	GAGAGAC	.	-	.	-
15	48735607		U6	-	GACAGAA	.	-	.	-
15	48735679		U6	-	GGAGAA	.	-	.	-
15	48735722		U6	rs257678375	G	.	-	.	-
15	48735730		U6	-	A	.	-	.	-
15	48736144		U6	rs241818905	C	.	-	.	-
15	48736574		U6	rs215360157	A	.	-	.	-
15	48736575		U6	rs227898065	G	.	-	.	-
15	48736752		U6	rs252788770;rs252758202	CTT	.	-	.	-
15	48737036		U6	-	T	.	-	.	-
15	48737182		U6	-	GGTACTGGCAGA	.	-	.	-
15	48737930		U6	-	AT	.	-	.	-
15	48738171		U6	rs225648547	T	.	-	.	-
15	48738278		U6	rs220278372	GT	.	-	.	-
15	48738281		U6	rs235952909;rs254008762	TTTTTG	TTTTTGTTTTG*	non_coding_exon_variant nc_transcript_variant	.	-
15	48738292		U6	-	T	.	-	.	-
15	48738301		U6	-	G	.	-	.	-
15	48738306		U6	-	GTT	.	-	.	-
15	48738307		U6	-	T	.	-	.	-
15	48738312		U6	-	GT	.	-	.	-
15	48738576		U6	-	CT	.	-	.	-
15	48738588		U6	rs263066344	A	G	upstream_gene_variant	-	-
15	48738620		U6	-	T	.	-	.	-
15	48738651		U6	-	GCTGT	.	-	.	-
15	48738806		U6	-	T	.	-	.	-
15	48739192		U6	-	GT	.	-	.	-
15	48739530		U6	rs215333073	C	T	upstream_gene_variant	-	-
15	48740160		U6	-	G	.	-	.	-
15	48740351		U6	rs220049275;rs214879146	CTTT	.	-	.	-
15	48740367		U6	-	T	.	-	.	-
15	48740430		U6	rs225779968	A	.	-	.	-
15	48740432		U6	rs224927137;rs243389817	CT	C	upstream_gene_variant	.	-
15	48740515		U6	-	T	.	-	.	-
15	48740604		U6	-	A	.	-	.	-
15	48741655		U6	-	A	.	-	.	-
15	48741745		U6	-	A	.	-	.	-
15	48741940		U6	-	TGCTG	.	-	.	-
15	48755679		U7	-	TACAC	.	-	.	-
15	48755719		U7	-	C	.	-	.	-
15	48755730		U7	-	AC	.	-	.	-
15	48755744		U7	-	CA	.	-	.	-
15	48755774		U7	-	CACAT	.	-	.	-
15	48755776		U7	-	CAT	.	-	.	-
15	48755851		U7	rs249790670	CAA	.	-	.	-
15	48755908		U7	rs256220826	C	.	-	.	-
15	48756627		U7	rs266081124	G	.	-	.	-
15	48756708		U7	rs243485847	CT	.	-	.	-
15	48756996		U7	rs215988150	C	.	-	.	-
15	48757118		U7	rs249511019	GAAAAAT	.	-	.	-
15	48757223		U7	rs239451132	C	.	-	.	-
15	48757240		U7	-	A	.	-	.	-
15	48757465		U7	rs32191160	A	G*	upstream_gene_variant downstream_gene_variant	-	-
15	48757854		U7	rs254131702	T	.	-	.	-
15	48757936		U7	rs232667703	TAA	.	-	.	-
15	48758178		U7	rs237505619	GA	.	-	.	-
15	48758381		U7	rs256658643	TG	.	-	.	-
15	48758429		U7	rs228922282	C	.	-	.	-
15	48758532		U7	rs260903502	ATGT	.	-	.	-
15	48758645		U7	rs222017559	TGTAATAGG	.	-	.	-
15	48758683		U7	rs260316448	A	G*	upstream_gene_variant downstream_gene_variant	-	-
15	48758690		U7	rs264069399	A	T*	upstream_gene_variant downstream_gene_variant	-	-
15	48758735		U7	rs258475141	T	.	-	.	-
15	48758893		U7	rs261731528	T	.	-	.	-
15	48758934		U7	rs218009474	AC	.	-	.	-
15	48759721		U7	rs226333095	G	.	-	.	-
15	48759786		U7	rs224492632	G	.	-	.	-
15	48760310		U7	rs215827895	TA	.	-	.	-
15	48760387		U7	rs235163665	G	.	-	.	-
15	48760728		U7	-	GTTTTTTGGTTTTTTTTTT	.	-	.	-
15	48760735		U7	-	G	.	-	.	-
15	48760736		U7	rs238154823	GTTT	.	-	.	-
15	48760739		U7	-	T	.	-	.	-
15	48760756		U7	rs212035315	AT	.	-	.	-
15	48761751		U7	rs251444785	C	.	-	.	-
15	48762696		U7	-	TG	.	-	.	-
15	48762758		U7	-	AGGGTGGACGGGTGC	.	-	.	-
15	48762794		U7	rs232999025	GATAA	G*	upstream_gene_variant downstream_gene_variant	.	-
15	48762988		U7	rs226396107	A	.	-	.	-
15	48763019		U7	rs215671836;rs246753296	TACAC	.	-	.	-
15	48763044		U7	-	A	.	-	.	-
15	48763232		U7	rs241612596	GT	.	-	.	-
15	48763345		U7	rs218503982	A	.	-	.	-
15	48763488		U7	rs247575131	TC	.	-	.	-
15	48763612		U7	rs258580768	C	.	-	.	-
15	48764370		U7	rs230846472	GA	.	-	.	-
15	48764756		U7	rs13482565	T	G	upstream_gene_variant	-	-
15	48888565	48888583					insertion	-
15	48934939	48935819					deletion	-
15	48940239	48946854					deletion	-
15	48951383	48951385					insertion	-
15	48956244	48957116					deletion	-
15	48967805	48967808					insertion	-
15	48969671	48970077					deletion	-
15	48998466	48999741					deletion	-
15	49080359	49087407					deletion	-
15	49154179	49158775					deletion	-
15	49203841	49211257					deletion	-
15	49341167	49341208					insertion	-
15	49350501	49352974					deletion	-
15	49358428	49361939					deletion	-
15	49364765		U6	rs36680494	T	C	upstream_gene_variant	-	-
15	49364777		U6	rs262060223	G	C	upstream_gene_variant	-	-
15	49364782		U6	rs220806259	A	G	upstream_gene_variant	-	-
15	49364791		U6	rs36485892	T	C	upstream_gene_variant	-	-
15	49364850		U6	rs49645315	G	C	upstream_gene_variant	-	-
15	49364862		U6	rs240132592	TG	.	-	.	-
15	49364887		U6	rs47259423	G	A	upstream_gene_variant	-	-
15	49364967		U6	rs108747496	G	T	upstream_gene_variant	-	-
15	49364990		U6	rs217868562	ATT	.	-	.	-
15	49365016		U6	rs231939035	A	G	upstream_gene_variant	-	-
15	49365030		U6	rs247254771	A	G	upstream_gene_variant	-	-
15	49365038		U6	rs259063253	T	A	upstream_gene_variant	-	-
15	49365054		U6	rs263601446	C	.	-	.	-
15	49365066		U6	rs38826197	A	T	upstream_gene_variant	-	-
15	49365111		U6	rs219944486	TTTTATA	T	upstream_gene_variant	.	-
15	49365122		U6	-	TATTTA	.	-	.	-
15	49365163		U6	rs52130173	C	T	upstream_gene_variant	-	-
15	49365181		U6	rs52469409	C	A	upstream_gene_variant	-	-
15	49365220		U6	rs47092817	T	C	upstream_gene_variant	-	-
15	49365232		U6	rs50137772	G	T	upstream_gene_variant	-	-
15	49365232		U6	rs239964544	G	.	-	.	-
15	49365265		U6	rs47262241	C	T	upstream_gene_variant	-	-
15	49365290		U6	rs48174161	G	C	upstream_gene_variant	-	-
15	49365330		U6	rs50577454	T	C	upstream_gene_variant	-	-
15	49365364		U6	rs51911199	G	T	upstream_gene_variant	-	-
15	49365373		U6	rs50687837	G	A	upstream_gene_variant	-	-
15	49365395		U6	rs248371148	ATTG	A	upstream_gene_variant	.	-
15	49365424		U6	rs46409130	T	C	upstream_gene_variant	-	-
15	49365425		U6	rs219299283	C	T	upstream_gene_variant	-	-
15	49365430		U6	rs248179934	A	G	upstream_gene_variant	-	-
15	49365434		U6	rs51533027	C	G	upstream_gene_variant	-	-
15	49365461		U6	rs48253186	T	C	upstream_gene_variant	-	-
15	49365490		U6	rs49246055	A	G	upstream_gene_variant	-	-
15	49365693		U6	rs224822162	T	TATA	upstream_gene_variant	.	-
15	49365867		U6	rs50967970	A	G	upstream_gene_variant	-	-
15	49365939		U6	rs38517337	G	T	upstream_gene_variant	-	-
15	49365975		U6	rs32117237	T	C	upstream_gene_variant	-	-
15	49366087		U6	rs216398703	TA	T	upstream_gene_variant	.	-
15	49366165		U6	rs31729754	T	G	upstream_gene_variant	-	-
15	49366196		U6	rs227796299	CCA	C	upstream_gene_variant	.	-
15	49366270		U6	rs31647117	G	A	upstream_gene_variant	-	-
15	49366431		U6	rs245215582	A	.	-	.	-
15	49366434		U6	rs231166656	T	TC	upstream_gene_variant	.	-
15	49366711		U6	rs31538298	G	T	upstream_gene_variant	-	-
15	49366739		U6	rs31734051	G	A	upstream_gene_variant	-	-
15	49366751		U6	rs31560351	G	T	upstream_gene_variant	-	-
15	49366869		U6	rs218916786	GC	G	upstream_gene_variant	.	-
15	49366870		U6	rs219003827	CT	.	-	.	-
15	49366915		U6	rs250651025	A	T	upstream_gene_variant	-	-
15	49366949		U6	rs52570914	G	A	upstream_gene_variant	-	-
15	49366954		U6	-	TA	.	-	.	-
15	49366969		U6	rs234488376	C	CA	upstream_gene_variant	.	-
15	49366999		U6	rs48182586	A	G	upstream_gene_variant	-	-
15	49367004		U6	rs47551982	A	G	upstream_gene_variant	-	-
15	49367023		U6	rs48510305	A	G	upstream_gene_variant	-	-
15	49367102		U6	rs47727655	G	A	upstream_gene_variant	-	-
15	49367141		U6	rs220131947	G	.	-	.	-
15	49367159		U6	rs232920983	A	G	upstream_gene_variant	-	-
15	49367161		U6	rs239490739	CA	.	-	.	-
15	49367162		U6	rs257925621	A	C	upstream_gene_variant	-	-
15	49367163		U6	rs258990515	G	A	upstream_gene_variant	-	-
15	49367240		U6	rs226416003	G	T	upstream_gene_variant	-	-
15	49367243		U6	rs245005978	C	T	upstream_gene_variant	-	-
15	49367247		U6	rs212835852	C	A	upstream_gene_variant	-	-
15	49367319		U6	rs257278587	AGTGTGCTTAGT	A	upstream_gene_variant	.	-
15	49367319	49367466					deletion	-
15	49367331		U6	-	G	a	upstream_gene_variant	-	-
15	49367333		U6	-	G	c	upstream_gene_variant	-	-
15	49367334		U6	rs243823758	TG	.	-	.	-
15	49367362		U6	rs254778249	T	.	-	-	-
15	49367378		U6	rs218149226	C	.	-	-	-
15	49367389		U6	rs238862128	A	.	-	-	-
15	49367447		U6	rs251375396	T	.	-	-	-
15	49367464		U6	rs220308563	C	.	-	-	-
15	49367465		U6	rs231654953	T	.	-	-	-
15	49367503		U6	rs220920920	G	A	upstream_gene_variant	-	-
15	49367542		U6	rs251817946	T	C	upstream_gene_variant	-	-
15	49367601		U6	rs231881666	GAGAA	.	-	.	-
15	49367605		U6	rs258867899	A	g	upstream_gene_variant	-	-
15	49367605		U6	-	A	.	-	.	-
15	49367611		U6	rs264274241	GAAAAAGAAAA	.	-	.	-
15	49367613		U6	rs226476302	A	g	upstream_gene_variant	-	-
15	49367650		U6	rs244872051	T	A	upstream_gene_variant	-	-
15	49367673		U6	rs227614241	C	T	upstream_gene_variant	-	-
15	49367724		U6	rs245342789	T	C	upstream_gene_variant	-	-
15	49367726		U6	rs214439461	A	G	upstream_gene_variant	-	-
15	49367742		U6	rs238595787	C	T	upstream_gene_variant	-	-
15	49367743		U6	rs256645061	T	G	upstream_gene_variant	-	-
15	49367878		U6	rs212634911	C	A	upstream_gene_variant	-	-
15	49367923		U6	rs36449331	C	T	upstream_gene_variant	-	-
15	49367944		U6	rs37494358	T	G	upstream_gene_variant	-	-
15	49367951		U6	rs220068212	A	T	upstream_gene_variant	-	-
15	49367952		U6	rs238586907	C	A	upstream_gene_variant	-	-
15	49367995		U6	rs36677538	T	A	upstream_gene_variant	-	-
15	49368021		U6	rs241041542	C	G	upstream_gene_variant	-	-
15	49368030		U6	rs261103668	G	GGGGTGT	upstream_gene_variant	.	-
15	49368036		U6	-	T	.	-	.	-
15	49368040		U6	rs212320874	G	t	upstream_gene_variant	-	-
15	49368040		U6	-	G	GTGGGT	upstream_gene_variant	.	-
15	49368048		U6	rs243365931	G	A	upstream_gene_variant	-	-
15	49368099		U6	rs227959250	TA	.	-	.	-
15	49368106		U6	rs231457643	AAT	.	-	.	-
15	49368123		U6	rs252519535	A	G	upstream_gene_variant	-	-
15	49368185		U6	rs222996763	C	T	upstream_gene_variant	-	-
15	49368187		U6	rs245971340	T	G	upstream_gene_variant	-	-
15	49368262		U6	rs247213207	C	CA	upstream_gene_variant	.	-
15	49368263		U6	-	T	a	upstream_gene_variant	-	-
15	49368266		U6	-	CTACA	.	-	.	-
15	49368306		U6	rs261925885	T	C	upstream_gene_variant	-	-
15	49368346		U6	rs245312997	GATA	.	-	.	-
15	49368358		U6	rs214691033	T	TA	upstream_gene_variant	.	-
15	49368362		U6	-	T	c	upstream_gene_variant	-	-
15	49368382		U6	rs228051700	C	T	upstream_gene_variant	-	-
15	49368425		U6	rs36393296	A	G	upstream_gene_variant	-	-
15	49368430		U6	rs258792752	G	C	upstream_gene_variant	-	-
15	49368497		U6	rs36379473	C	A	upstream_gene_variant	-	-
15	49368502		U6	rs36500310	G	A	upstream_gene_variant	-	-
15	49368517		U6	rs240219751	T	TAA	upstream_gene_variant	.	-
15	49368624		U6	rs38953121	G	A	upstream_gene_variant	-	-
15	49368679		U6	rs258412343	TAA	TA	upstream_gene_variant	.	-
15	49368700		U6	rs230033272	T	A	upstream_gene_variant	-	-
15	49368709		U6	rs254755912	A	T	upstream_gene_variant	-	-
15	49368822		U6	rs36357234	T	G	upstream_gene_variant	-	-
15	49368849		U6	rs37424106	T	C	upstream_gene_variant	-	-
15	49368864		U6	rs36743036	C	A	upstream_gene_variant	-	-
15	49368885		U6	rs216143791	A	T	upstream_gene_variant	-	-
15	49368888		U6	rs235161979	T	C	upstream_gene_variant	-	-
15	49368927		U6	-	G	C	upstream_gene_variant	-	-
15	49368933		U6	rs37437215	A	G	upstream_gene_variant	-	-
15	49368942		U6	rs235271219	A	.	-	.	-
15	49368987		U6	rs37093581	A	T	upstream_gene_variant	-	-
15	49369011		U6	rs36582364	A	G	upstream_gene_variant	-	-
15	49369071		U6	rs213997551	T	G	upstream_gene_variant	-	-
15	49369094		U6	rs253597402	A	T	upstream_gene_variant	-	-
15	49369095		U6	rs211713312	C	A	upstream_gene_variant	-	-
15	49369105		U6	rs242818890	C	A	upstream_gene_variant	-	-
15	49369112		U6	rs221373326	G	A	upstream_gene_variant	-	-
15	49369128		U6	rs38047779	T	C	upstream_gene_variant	-	-
15	49369168		U6	rs37957874	G	A	upstream_gene_variant	-	-
15	49369268		U6	rs249499189	CCTT	.	-	.	-
15	49369289		U6	rs224117435	C	CT	upstream_gene_variant	.	-
15	49369318		U6	-	TTCAA	.	-	.	-
15	49369321		U6	rs248701669	AATTT	A	upstream_gene_variant	.	-
15	49369337		U6	rs48150397	C	T	upstream_gene_variant	-	-
15	49369339		U6	rs257771371	C	T	upstream_gene_variant	-	-
15	49369374		U6	rs48835059	C	T	upstream_gene_variant	-	-
15	49369386		U6	rs50778058	G	A	upstream_gene_variant	-	-
15	49369393		U6	rs47208887	T	C	upstream_gene_variant	-	-
15	49369421		U6	rs47564504	G	A	upstream_gene_variant	-	-
15	49369441		U6	rs50279357	C	G	upstream_gene_variant	-	-
15	49369457		U6	rs48126070	A	G	upstream_gene_variant	-	-
15	49369506		U6	rs36874135	A	G	upstream_gene_variant	-	-
15	49369546		U6	rs36787588	C	T	upstream_gene_variant	-	-
15	49369572		U6	rs46014628	T	A	upstream_gene_variant	-	-
15	49369577		U6	rs230365074	A	C	upstream_gene_variant	-	-
15	49369627		U6	rs37129326	T	A	upstream_gene_variant	-	-
15	49369648		U6	rs212290437	A	G	upstream_gene_variant	-	-
15	49369694		U6	rs214064770	CT	C	upstream_gene_variant	.	-
15	49369713		U6	rs229576375	G	T	upstream_gene_variant	-	-
15	49369718		U6	rs248351085	C	A	upstream_gene_variant	-	-
15	49369725		U6	rs48733022	A	T	upstream_gene_variant	-	-
15	49369820		U6	rs246407501	A	G*	non_coding_exon_variant nc_transcript_variant	-	-
15	49369824		U6	rs215593009	A	T*	non_coding_exon_variant nc_transcript_variant	-	-
15	49369829		U6	rs226644660	A	G*	non_coding_exon_variant nc_transcript_variant	-	-
15	49369848		U6	rs108592309	A	G	downstream_gene_variant	-	-
15	49369858		U6	rs233967027	A	.	-	.	-
15	49369875		U6	rs238654581	A	ACAAAAC	downstream_gene_variant	.	-
15	49369908		U6	rs242004104	A	C	downstream_gene_variant	-	-
15	49369921		U6	rs253693304	T	C	downstream_gene_variant	-	-
15	49369932		U6	-	G	A	downstream_gene_variant	-	-
15	49369934		U6	rs236100647	TGACG	.	-	.	-
15	49369946		U6	rs213005616	TGC	T	downstream_gene_variant	.	-
15	49369957		U6	-	C	T	downstream_gene_variant	-	-
15	49369959		U6	-	T	A	downstream_gene_variant	-	-
15	49369963		U6	rs221063342	T	G	downstream_gene_variant	-	-
15	49369965		U6	rs239922906	C	A	downstream_gene_variant	-	-
15	49370019		U6	rs256615300	C	.	-	.	-
15	49370064		U6	rs246292996	A	G	downstream_gene_variant	-	-
15	49370077		U6	rs214504711	G	T	downstream_gene_variant	-	-
15	49370102		U6	rs237727957	C	T	downstream_gene_variant	-	-
15	49370115		U6	rs255961545	T	C	downstream_gene_variant	-	-
15	49370177		U6	rs212976490	T	.	-	.	-
15	49370200		U6	rs108794621	T	C	downstream_gene_variant	-	-
15	49370202		U6	rs108335897	C	T	downstream_gene_variant	-	-
15	49370212		U6	rs46088436	T	A	downstream_gene_variant	-	-
15	49370224		U6	rs226509941	T	C	downstream_gene_variant	-	-
15	49370228		U6	rs108303181	C	T	downstream_gene_variant	-	-
15	49370248		U6	rs221379787	T	C	downstream_gene_variant	-	-
15	49370266		U6	rs239102460	T	C	downstream_gene_variant	-	-
15	49370334		U6	rs52047368	T	G	downstream_gene_variant	-	-
15	49370335		U6	rs45647686	C	A	downstream_gene_variant	-	-
15	49370376		U6	rs37349297	A	T	downstream_gene_variant	-	-
15	49370417		U6	rs51564907	A	C	downstream_gene_variant	-	-
15	49370422		U6	rs47615688	A	T	downstream_gene_variant	-	-
15	49370429		U6	rs46265567	A	T	downstream_gene_variant	-	-
15	49370530		U6	rs227204657	G	GA	downstream_gene_variant	.	-
15	49370537		U6	rs257628900	T	g	downstream_gene_variant	-	-
15	49370658		U6	rs49703358	C	A	downstream_gene_variant	-	-
15	49370659		U6	rs50076456	C	T	downstream_gene_variant	-	-
15	49370676		U6	rs50026898	C	T	downstream_gene_variant	-	-
15	49370737		U6	rs49626377	T	C	downstream_gene_variant	-	-
15	49370757		U6	rs222369344	C	.	-	.	-
15	49370764		U6	rs238793070	AT	.	-	.	-
15	49370765		U6	rs36676370	T	A	downstream_gene_variant	-	-
15	49370805		U6	-	AAACAAAAGAC	.	-	.	-
15	49370806		U6	rs264848479	AACAAAAGAC	.	-	.	-
15	49370807		U6	rs213454907	ACAAAAGAC	A	downstream_gene_variant	.	-
15	49370808		U6	rs264305316	C	a	downstream_gene_variant	-	-
15	49370813		U6	rs222219469	G	a	downstream_gene_variant	-	-
15	49370903		U6	rs48756774	G	A	downstream_gene_variant	-	-
15	49370945		U6	rs50849964	T	A	downstream_gene_variant	-	-
15	49370966		U6	rs51413781	G	A	downstream_gene_variant	-	-
15	49370971		U6	rs237298626	G	GA	downstream_gene_variant	.	-
15	49370996		U6	rs50517733	C	T	downstream_gene_variant	-	-
15	49371001		U6	rs241154868	A	G	downstream_gene_variant	-	-
15	49371002		U6	rs47475812	C	A	downstream_gene_variant	-	-
15	49371024		U6	rs48291855	A	G	downstream_gene_variant	-	-
15	49371028		U6	rs47878361	G	A	downstream_gene_variant	-	-
15	49371035		U6	rs49810398	T	A	downstream_gene_variant	-	-
15	49371051		U6	-	G	A	downstream_gene_variant	-	-
15	49371061		U6	rs218069241	T	TG	downstream_gene_variant	.	-
15	49371142		U6	rs234840288	T	C	downstream_gene_variant	-	-
15	49371181	49371183					insertion	-
15	49371219		U6	rs261759552	C	A	downstream_gene_variant	-	-
15	49371248		U6	rs221107849	A	G	downstream_gene_variant	-	-
15	49371287		U6	rs222458996	C	A	downstream_gene_variant	-	-
15	49371302		U6	rs258994336	C	T	downstream_gene_variant	-	-
15	49371369		U6	rs231614338	C	CA	downstream_gene_variant	.	-
15	49371385	49372185					deletion	-
15	49371386		U6	rs226418421	C	.	-	-	-
15	49371514		U6	rs246131479	AGT	.	-	.	-
15	49371523		U6	-	TTTGTTG	.	-	.	-
15	49371609		U6	rs243148684	T	.	-	-	-
15	49371622		U6	-	C	.	-	-	-
15	49371631		U6	rs239771734	A	.	-	.	-
15	49371652		U6	rs242850698	ATT	.	-	.	-
15	49371699		U6	rs264852844	A	.	-	-	-
15	49371822		U6	rs227799550	A	.	-	-	-
15	49371964		U6	rs260298684	G	.	-	-	-
15	49371966		U6	rs216706137	G	.	-	-	-
15	49372000		U6	rs227753240	T	.	-	-	-
15	49372092		U6	rs245405923	A	.	-	-	-
15	49372147		U6	rs214708377	A	.	-	-	-
15	49372157		U6	rs238420788	T	.	-	-	-
15	49372173		U6	rs256710073	T	.	-	-	-
15	49372201		U6	rs47598402	G	A	downstream_gene_variant	-	-
15	49372210		U6	rs47149869	A	T	downstream_gene_variant	-	-
15	49372235		U6	rs46826351	T	C	downstream_gene_variant	-	-
15	49372236		U6	rs46772744	G	A	downstream_gene_variant	-	-
15	49372325		U6	rs32241349	T	C	downstream_gene_variant	-	-
15	49372363		U6	rs45978609	G	A	downstream_gene_variant	-	-
15	49372365		U6	rs47341421	C	A	downstream_gene_variant	-	-
15	49372646		U6	rs36247024	C	T	downstream_gene_variant	-	-
15	49372688		U6	rs38294264	T	C	downstream_gene_variant	-	-
15	49372769		U6	rs46755424	C	T	downstream_gene_variant	-	-
15	49372829		U6	rs262792947	G	A	downstream_gene_variant	-	-
15	49372830		U6	rs230440302	T	C	downstream_gene_variant	-	-
15	49372833		U6	rs250043976	G	A	downstream_gene_variant	-	-
15	49372891		U6	rs46594057	T	C	downstream_gene_variant	-	-
15	49372896		U6	rs49923183	T	A	downstream_gene_variant	-	-
15	49372911		U6	rs48236531	T	C	downstream_gene_variant	-	-
15	49372974		U6	rs52553352	T	C	downstream_gene_variant	-	-
15	49372977		U6	rs52299259	G	A	downstream_gene_variant	-	-
15	49372993		U6	-	A	.	-	.	-
15	49373000		U6	rs256191165	T	.	-	.	-
15	49373013		U6	rs224539243	T	TAATAG	downstream_gene_variant	.	-
15	49373059		U6	rs52171452	A	G	downstream_gene_variant	-	-
15	49373060		U6	rs52314626	C	T	downstream_gene_variant	-	-
15	49373107		U6	rs246607766	G	.	-	.	-
15	49373135		U6	rs37237476	T	A	downstream_gene_variant	-	-
15	49373204		U6	rs37122207	A	T	downstream_gene_variant	-	-
15	49373239		U6	rs37276816	G	C	downstream_gene_variant	-	-
15	49373277		U6	rs37390183	G	A	downstream_gene_variant	-	-
15	49373302		U6	rs36242578	A	T	downstream_gene_variant	-	-
15	49373413		U6	rs241216666	A	AT	downstream_gene_variant	.	-
15	49373426		U6	-	C	T	downstream_gene_variant	-	-
15	49373469		U6	rs36754712	G	A	downstream_gene_variant	-	-
15	49373496		U6	rs50568111	G	T	downstream_gene_variant	-	-
15	49373510		U6	rs223629884	T	G	downstream_gene_variant	-	-
15	49373512		U6	rs211841955	A	G	downstream_gene_variant	-	-
15	49373518		U6	rs234908966	C	T	downstream_gene_variant	-	-
15	49373545		U6	rs51721304	A	G	downstream_gene_variant	-	-
15	49373566		U6	rs48079818	C	T	downstream_gene_variant	-	-
15	49373583		U6	rs257826959	T	C	downstream_gene_variant	-	-
15	49373605		U6	rs260916544	G	C	downstream_gene_variant	-	-
15	49373624		U6	rs221067079	A	T	downstream_gene_variant	-	-
15	49373677		U6	rs226324480	CT	C	downstream_gene_variant	.	-
15	49373688		U6	rs45831944	C	T	downstream_gene_variant	-	-
15	49373689		U6	rs46088377	C	T	downstream_gene_variant	-	-
15	49373704		U6	-	T	C	downstream_gene_variant	-	-
15	49373705		U6	-	T	C	downstream_gene_variant	-	-
15	49373706		U6	-	G	A	downstream_gene_variant	-	-
15	49373736		U6	rs51701716	T	A	downstream_gene_variant	-	-
15	49373812		U6	rs48407945	G	A	downstream_gene_variant	-	-
15	49373838		U6	rs51979595	C	A	downstream_gene_variant	-	-
15	49373871		U6	rs47947282	A	G	downstream_gene_variant	-	-
15	49373876		U6	rs229047621	G	A	downstream_gene_variant	-	-
15	49373880		U6	rs47575956	C	A	downstream_gene_variant	-	-
15	49373892		U6	rs47901264	T	C	downstream_gene_variant	-	-
15	49373918		U6	rs51643196	T	C	downstream_gene_variant	-	-
15	49373919		U6	rs46228717	G	A	downstream_gene_variant	-	-
15	49373926		U6	rs48366302	A	G	downstream_gene_variant	-	-
15	49373953		U6	rs49736075	G	T	downstream_gene_variant	-	-
15	49373958		U6	rs255581718	G	A	downstream_gene_variant	-	-
15	49373963		U6	rs223503337	G	T	downstream_gene_variant	-	-
15	49373965		U6	rs235729370	T	G	downstream_gene_variant	-	-
15	49373970		U6	rs52023604	T	C	downstream_gene_variant	-	-
15	49374006		U6	rs38524978	T	C	downstream_gene_variant	-	-
15	49374045		U6	rs265088607	CTTA	.	-	.	-
15	49374106		U6	rs36638932	T	A	downstream_gene_variant	-	-
15	49374126		U6	rs221690068	CA	.	-	.	-
15	49374135		U6	rs222132869	T	C	downstream_gene_variant	-	-
15	49374146		U6	-	A	T	downstream_gene_variant	-	-
15	49374148		U6	-	C	T	downstream_gene_variant	-	-
15	49374158		U6	-	C	A	downstream_gene_variant	-	-
15	49374162		U6	rs229175858	ATG	.	-	.	-
15	49374167		U6	-	G	A	downstream_gene_variant	-	-
15	49374169		U6	-	A	G	downstream_gene_variant	-	-
15	49374216		U6	rs47133219	G	A	downstream_gene_variant	-	-
15	49374229		U6	rs47382648	T	C	downstream_gene_variant	-	-
15	49374250		U6	rs50525382	T	G	downstream_gene_variant	-	-
15	49374291		U6	rs37325950	A	C	downstream_gene_variant	-	-
15	49374318		U6	rs231808184	A	G	downstream_gene_variant	-	-
15	49374320		U6	rs251402129	G	A	downstream_gene_variant	-	-
15	49374326		U6	rs214006623	T	C	downstream_gene_variant	-	-
15	49374329		U6	rs235451643	G	T	downstream_gene_variant	-	-
15	49374341		U6	rs243486862	A	C	downstream_gene_variant	-	-
15	49374400		U6	rs38319558	G	T	downstream_gene_variant	-	-
15	49374445		U6	rs36562877	A	T	downstream_gene_variant	-	-
15	49374473		U6	rs214172732	T	C	downstream_gene_variant	-	-
15	49374474		U6	rs235398591	G	A	downstream_gene_variant	-	-
15	49374485		U6	rs47501810	T	A	downstream_gene_variant	-	-
15	49374503		U6	rs245190093	T	.	-	.	-
15	49374554		U6	rs36301511	G	T	downstream_gene_variant	-	-
15	49374593		U6	rs46538729	T	A	downstream_gene_variant	-	-
15	49374651		U6	rs46457166	T	A	downstream_gene_variant	-	-
15	49374672		U6	rs47921219	T	A	downstream_gene_variant	-	-
15	49374679		U6	rs46685797	G	A	downstream_gene_variant	-	-
15	49374702		U6	rs47199719	C	T	downstream_gene_variant	-	-
15	49374748		U6	rs243839153	A	.	-	.	-
15	49374755		U6	rs50529847	G	A	downstream_gene_variant	-	-
15	49374780		U6	rs46723944	G	A	downstream_gene_variant	-	-
15	49374836		U6	rs48069030	T	G	downstream_gene_variant	-	-
15	49374845		U6	rs51324601	T	C	downstream_gene_variant	-	-
15	49382509	49382511					insertion	-
15	49465924	49466052					insertion	-
15	49554636	49554638					-		insertion
15	49565226	49569384					deletion	-
15	49572576	49572688					deletion	-
15	49779694	49780947					deletion	-
15	50085109	50085507					deletion	-
15	50098576	50098578					insertion	-
15	50165295	50165437					deletion	-
15	50196010	50202176					deletion	-
15	50381786	50382025					deletion	-
15	50426185	50435833					deletion	-
15	50456719	50463935					deletion	-
15	50481868		Trps1	rs253781344	T	.	-	.	-
15	50481936		Trps1	rs228863171	A	.	-	.	-
15	50482067		Trps1	rs226831406	G	.	-	.	-
15	50482214		Trps1	rs214524484	A	.	-	.	-
15	50482446		Trps1	rs221227191	T	.	-	.	-
15	50482728		Trps1	rs236258869	CGTTCTTTT	.	-	.	-
15	50482812		Trps1	rs226724747	AT	.	-	.	-
15	50482832		Trps1	rs250031210	GA	.	-	.	-
15	50482972		Trps1	rs231469735	AT	.	-	.	-
15	50483738		Trps1	rs247384903;rs235102075	TA	.	-	.	-
15	50483749		Trps1	-	TAAAC	.	-	.	-
15	50484076		Trps1	rs236656095	G	.	-	.	-
15	50484136		Trps1	rs240075716;rs253671894	CGTGTGT	CGT	downstream_gene_variant	.	-
15	50484244		Trps1	rs241461891	ATAACC	.	-	.	-
15	50484550		Trps1	rs256357410	TTCTGCGA	.	-	.	-
15	50484643		Trps1	rs221399570	T	.	-	.	-
15	50485032		Trps1	-	T	.	-	.	-
15	50485390		Trps1	rs247957612	C	.	-	.	-
15	50485396		Trps1	rs264817775	G	.	-	.	-
15	50485541		Trps1	rs32521223	C	T	downstream_gene_variant	-	-
15	50485542		Trps1	-	G	.	-	.	-
15	50485845		Trps1	rs229034278	GA	.	-	.	-
15	50486133		Trps1	rs263219515	A	.	-	.	-
15	50486520		Trps1	rs244880529;rs243384566	ATT	.	-	.	-
15	50486608		Trps1	rs256071367	C	.	-	.	-
15	50486886		Trps1	rs214587968	G	GA*	3_prime_utr_variant downstream_gene_variant feature_elongation	.	-
15	50487321		Trps1	rs265514689	CATA	.	-	.	-
15	50487409		Trps1	rs213910487	T	.	-	.	-
15	50487412		Trps1	rs213866927	A	.	-	.	-
15	50487810		Trps1	rs211880283	AAC	.	-	.	-
15	50487863		Trps1	rs227239369	C	.	-	.	-
15	50488066		Trps1	rs223198538	TA	.	-	.	-
15	50488659		Trps1	rs229324045	T	TAACAAAACAA*	3_prime_utr_variant downstream_gene_variant feature_elongation	.	-
15	50488679		Trps1	rs244655483;rs255665047	CAA	.	-	.	-
15	50488680		Trps1	rs255665047	A	.	-	.	-
15	50489217		Trps1	rs212075769	TC	.	-	.	-
15	50489218		Trps1	rs211751805	CA	.	-	.	-
15	50489695		Trps1	rs227159988	A	.	-	.	-
15	50489948		Trps1	rs225781924	A	.	-	.	-
15	50489953		Trps1	rs239521487	C	.	-	.	-
15	50489977		Trps1	-	AT	.	-	.	-
15	50489986		Trps1	rs257089436	TA	.	-	.	-
15	50490003		Trps1	rs257947189	CA	.	-	.	-
15	50490068		Trps1	rs13467658	T	C*	3_prime_utr_variant downstream_gene_variant	-	-
15	50490263		Trps1	rs13467657	A	T*	3_prime_utr_variant downstream_gene_variant	-	-
15	50490368		Trps1	-	A	.	-	.	-
15	50490370		Trps1	rs249885305;rs217510005	TAAA	.	-	.	-
15	50490746		Trps1	rs249732853	GT	.	-	.	-
15	50491714		Trps1	rs238936783;rs250962692	AT	.	-	.	-
15	50491983		Trps1	-	TTTTC	.	-	.	-
15	50492076		Trps1	rs253944345	G	.	-	.	-
15	50492079		Trps1	rs32310851	T	A	3_prime_utr_variant	-	-
15	50492081		Trps1	rs263027079	TAA	.	-	.	-
15	50493800		Trps1	rs260694303	GTCT	.	-	.	-
15	50493805		Trps1	rs250583824;rs245606947	CTTGTTTGT	.	-	.	-
15	50493821		Trps1	-	TTTGTTTG	.	-	.	-
15	50494383		Trps1	rs260040767	AT	.	-	.	-
15	50494639		Trps1	rs261549596	AT	.	-	.	-
15	50495261		Trps1	rs212002068	T	.	-	.	-
15	50495486		Trps1	rs217717000	T	.	-	.	-
15	50495616		Trps1	rs221333406	T	.	-	.	-
15	50495766		Trps1	rs225934481	CT	.	-	.	-
15	50496198		Trps1	rs242052772	TAAGCTTCCCCTA	T	feature_truncation	.	-
15	50496362		Trps1	rs248012096	TG	.	-	.	-
15	50496371		Trps1	rs235675143	G	GA	feature_elongation	.	-
15	50497122		Trps1	rs235306795	TC	.	-	.	-
15	50497175		Trps1	rs244745029	ATT	.	-	.	-
15	50497237		Trps1	rs243453049	CTG	.	-	.	-
15	50497284		Trps1	rs214414371	CAAA	.	-	.	-
15	50498077		Trps1	rs214186333	AGC	.	-	.	-
15	50499669		Trps1	rs253195904	CT	.	-	.	-
15	50500393		Trps1	-	C	.	-	.	-
15	50500520		Trps1	rs222888510	GAA	.	-	.	-
15	50500729		Trps1	rs231763922	T	.	-	.	-
15	50501309		Trps1	rs230313444	A	.	-	.	-
15	50501392		Trps1	-	CATAT	.	-	.	-
15	50501393		Trps1	rs242438690	A	.	-	.	-
15	50501905		Trps1	rs251116087	G	.	-	.	-
15	50502066		Trps1	-	CATT	.	-	.	-
15	50502242		Trps1	rs241106328	CATAT	.	-	.	-
15	50502664		Trps1	rs244872945	C	.	-	.	-
15	50502751		Trps1	rs262999157	T	.	-	.	-
15	50502932		Trps1	-	T	.	-	.	-
15	50503689		Trps1	-	CCAA	.	-	.	-
15	50503692		Trps1	rs255821461	ACAACAACAACAT	.	-	.	-
15	50503698		Trps1	rs238444461	ACAACAT	.	-	.	-
15	50503701		Trps1	-	ACAT	.	-	.	-
15	50503704		Trps1	-	T	TCAA	feature_elongation	.	-
15	50503723		Trps1	-	CA	.	-	.	-
15	50503724		Trps1	-	A	.	-	.	-
15	50503727		Trps1	rs222811305	AACACACACAC	AACAACACACACACAC	-	.	-
15	50503763		Trps1	-	C	.	-	.	-
15	50504484		Trps1	rs252471678	G	.	-	.	-
15	50505036		Trps1	rs249913991	T	.	-	.	-
15	50505109		Trps1	rs219525880	CACAT	.	-	.	-
15	50505115		Trps1	-	CATACAT	.	-	c	feature_truncation
15	50505189		Trps1	-	T	.	-	.	-
15	50505191		Trps1	rs254066211	T	.	-	.	-
15	50505211		Trps1	rs252675862	T	.	-	.	-
15	50505316		Trps1	rs253133123	CAT	.	-	.	-
15	50505320		Trps1	rs245633858	T	.	-	.	-
15	50505352		Trps1	-	C	.	-	.	-
15	50505408		Trps1	rs238120646	C	.	-	.	-
15	50505488		Trps1	rs249809163	TA	.	-	.	-
15	50505496		Trps1	rs244664909	CGTGTGTGTGTGTGTGT	CGTGTGTGTGTGTGT	-	.	-
15	50506163		Trps1	rs217091543	ATG	A	feature_truncation	.	-
15	50506175		Trps1	-	G	.	-	.	-
15	50506185		Trps1	-	G	.	-	.	-
15	50506187		Trps1	-	GTGTGTGTCTGTGTGTC	.	-	.	-
15	50506189		Trps1	rs217867029	GTGTGTCTGTGTGTC	.	-	.	-
15	50506193		Trps1	rs255516970	GTCTGTGTGTC	.	-	.	-
15	50506378		Trps1	rs242297526	AAGATGAAC	.	-	.	-
15	50506531		Trps1	rs257043222	C	.	-	.	-
15	50507121		Trps1	rs252378928	GA	.	-	.	-
15	50507229		Trps1	rs231974852	GT	.	-	.	-
15	50507337		Trps1	rs238430355	T	.	-	.	-
15	50507648		Trps1	rs218893183	TAA	.	-	.	-
15	50508136		Trps1	rs220790381	G	.	-	.	-
15	50508166		Trps1	rs263601431	CA	.	-	.	-
15	50508271		Trps1	rs216442287	CCT	.	-	.	-
15	50508274		Trps1	rs263117745	C	.	-	.	-
15	50508301		Trps1	rs242679927	TC	.	-	.	-
15	50508331		Trps1	rs220597418	TTGTTTG	.	-	.	-
15	50508332		Trps1	rs214603605	TGTTTG	.	-	.	-
15	50508333		Trps1	rs234410797	G	.	-	.	-
15	50508335		Trps1	-	TTG	.	-	.	-
15	50508337		Trps1	rs220005158	G	.	-	.	-
15	50508848		Trps1	rs228237773	T	.	-	.	-
15	50509304		Trps1	rs229764511	T	.	-	.	-
15	50509336		Trps1	rs237678579	CAT	.	-	.	-
15	50509398		Trps1	rs232212169	GTATA	.	-	.	-
15	50509418		Trps1	-	A	.	-	.	-
15	50510316		Trps1	rs236594546	AAATAAAT	.	-	.	-
15	50510620		Trps1	-	TATATATATA	.	-	.	-
15	50510626		Trps1	-	TA	.	-	.	-
15	50510632		Trps1	-	T	.	-	.	-
15	50510647		Trps1	rs262861864	GTTTTTT	GTTTT	-	.	-
15	50510813		Trps1	-	A	.	-	.	-
15	50510884		Trps1	-	T	.	-	.	-
15	50511445		Trps1	rs263563725	A	.	-	.	-
15	50511484		Trps1	rs226589935	T	.	-	.	-
15	50511570		Trps1	-	ATTTCACTTTAAATAGAC	.	-	.	-
15	50511611		Trps1	rs221495346	C	.	-	.	-
15	50511740		Trps1	rs234349447	T	.	-	.	-
15	50512697		Trps1	rs223130405	TTGTGTGTGTGTGTGTGTGTGTGTGTGTGTGTGTG	TTGTGTGTGTGTGTGTGTGTGTG	-	TTGTGTGTGTGTGTGTGTGTGTGTGTGTGTGTGTGTGTG	-
15	50512740		Trps1	rs262488002	TGTGTGTGTGTGTGTGA	.	-	.	-
15	50512890		Trps1	rs265968477	TAG	.	-	.	-
15	50512904		Trps1	-	CTT	.	-	.	-
15	50512987		Trps1	rs260447739	CTT	.	-	.	-
15	50513000		Trps1	-	A	.	-	.	-
15	50513021		Trps1	-	T	.	-	.	-
15	50513217		Trps1	rs257943472	T	.	-	.	-
15	50513699		Trps1	rs250638351	T	.	-	.	-
15	50513701		Trps1	rs229105907	C	.	-	.	-
15	50513734		Trps1	rs252281662	C	.	-	.	-
15	50513741		Trps1	-	T	.	-	.	-
15	50513786		Trps1	rs224662405	G	.	-	.	-
15	50513885		Trps1	rs226489198	ATGTGTGTGTG	atgtgtgtg/atgtgtg	-	.	-
15	50513925		Trps1	-	GTGTGTGTA	.	-	.	-
15	50513931		Trps1	-	GTA	.	-	.	-
15	50513978		Trps1	rs235772338	G	.	-	.	-
15	50514211		Trps1	-	TCGGGGG	.	-	.	-
15	50514212		Trps1	rs231343555	CGGGGGG	CGG	-	.	-
15	50514221		Trps1	rs260429587	GGGGGGA	.	-	.	-
15	50514223		Trps1	-	GGGGA	G	feature_truncation	.	-
15	50514740		Trps1	rs236892175	CT	.	-	.	-
15	50515356		Trps1	rs246910031	TA	.	-	.	-
15	50515489		Trps1	rs225838044;rs213051725	TGGGA	.	-	.	-
15	50515492		Trps1	-	GA	.	-	.	-
15	50515493		Trps1	rs230870972	AGG	AG	-	.	-
15	50515733		Trps1	rs237034455	AAGAACACGGCG	.	-	.	-
15	50516890		Trps1	rs213181773	G	.	-	.	-
15	50516953		Trps1	rs218930640	C	.	-	.	-
15	50517598		Trps1	rs232437284	ATTT	.	-	.	-
15	50518639		Trps1	-	AAGAGAGAGAGAG	A	feature_truncation	.	-
15	50518690		Trps1	-	AGG	.	-	.	-
15	50518707		Trps1	-	GGA	.	-	.	-
15	50518713		Trps1	-	A	AAGAGAGAGAG	feature_elongation	.	-
15	50518813		Trps1	rs212619835	A	.	-	.	-
15	50518861		Trps1	rs245336133	CTG	.	-	.	-
15	50518899		Trps1	rs245233452	CA	.	-	.	-
15	50519379		Trps1	-	A	.	-	.	-
15	50519381		Trps1	-	AC	.	-	.	-
15	50519382		Trps1	rs238766714	C	.	-	.	-
15	50519445		Trps1	-	GTTTGTGTGTGTGTTTTTTTTTTT	.	-	.	-
15	50519447		Trps1	rs222093561	TTGTGTGTGTGTTTTTTTTTTTTGTGTGTGTGTG	.	-	.	-
15	50519464		Trps1	-	T	.	-	.	-
15	50519660		Trps1	rs219661091	T	.	-	.	-
15	50519666		Trps1	-	AAGG	.	-	.	-
15	50519667		Trps1	rs254378026	AGGG	.	-	.	-
15	50520266		Trps1	rs242128129	TAGAC	.	-	.	-
15	50520489		Trps1	rs223734824;rs247332365	CTTTTTTTTTTTTTCCCCTTCATCGTCTTTTTTTTTT	CTTTTTTTTTTTTCCCCTTCATCGTCTTTTTTTTTT	-	.	-
15	50520502		Trps1	-	T	.	-	.	-
15	50520515		Trps1	-	CTTTTTTTTTTTTTTTTTTT	.	-	.	-
15	50521015		Trps1	rs244404637	AAC	.	-	.	-
15	50521016		Trps1	rs217731299	ACAC	.	-	.	-
15	50521200		Trps1	-	CAGATAGATAGATATGTAGATAGATAGATAGATAGAT	.	-	.	-
15	50521211		Trps1	rs237823048	ATATG	.	-	.	-
15	50521215		Trps1	rs221006112	G	GTAGA	feature_elongation	.	-
15	50521246		Trps1	-	G	.	-	.	-
15	50521342		Trps1	rs247088087	A	.	-	.	-
15	50521354		Trps1	rs222740431	GCA	.	-	.	-
15	50521359		Trps1	rs216176251	C	.	-	.	-
15	50521818		Trps1	rs265034388	CG	.	-	.	-
15	50521945	50521966					insertion	-
15	50522047		Trps1	rs242715513;rs234933453	AT	.	-	.	-
15	50522198		Trps1	rs226681963	T	.	-	.	-
15	50522219		Trps1	rs255632998	GAGGGGAC	.	-	.	-
15	50522486		Trps1	rs264512827;rs216510279	CTTGTTTGTTTGTTTGT	.	-	.	-
15	50523921		Trps1	rs244127702	GA	.	-	.	-
15	50523928		Trps1	rs219991724	AATT	.	-	.	-
15	50523929		Trps1	rs218043511	ATT	.	-	.	-
15	50524264		Trps1	rs217028507	GAAC	.	-	.	-
15	50524605		Trps1	rs261498442	CA	C	feature_truncation	.	-
15	50525448		Trps1	rs223025815	AT	.	-	.	-
15	50525649		Trps1	rs224331730	T	.	-	.	-
15	50525947		Trps1	rs230789041	T	.	-	.	-
15	50526129		Trps1	rs231197931	G	.	-	.	-
15	50527600		Trps1	rs231533047;rs241711058	TTTG	.	-	.	-
15	50527820		Trps1	rs260906463;rs244979896	AAC	A	feature_truncation	.	-
15	50527842		Trps1	rs245605603	C	.	-	.	-
15	50528411		Trps1	rs249317434	CT	.	-	.	-
15	50528519		Trps1	rs235384943	TTC	.	-	.	-
15	50529276		Trps1	rs241185117	G	GT	feature_elongation	.	-
15	50529282		Trps1	-	TTTTTC	.	-	.	-
15	50530557		Trps1	rs259837621	TG	T	feature_truncation	.	-
15	50530562		Trps1	-	GGGT	.	-	.	-
15	50530564		Trps1	-	GT	.	-	.	-
15	50530565		Trps1	rs253195530	TG	.	-	.	-
15	50530570		Trps1	-	G	.	-	.	-
15	50530968		Trps1	rs246746501	AAGT	.	-	.	-
15	50531020		Trps1	rs234910937;rs263859871	GCA	G	feature_truncation	.	-
15	50531066		Trps1	-	AGAG	.	-	.	-
15	50531126		Trps1	rs259447506	G	.	-	.	-
15	50531197		Trps1	rs265373868	AAAAAATAAAAT	.	-	.	-
15	50531384		Trps1	rs246800713	A	.	-	.	-
15	50531454		Trps1	rs253467248	A	.	-	.	-
15	50532256		Trps1	rs257646702	AT	.	-	.	-
15	50532449		Trps1	-	A	.	-	.	-
15	50532681		Trps1	-	G	.	-	.	-
15	50532740		Trps1	-	G	.	-	.	-
15	50532847		Trps1	rs254723862	GCTGCCAGCA	.	-	.	-
15	50533355		Trps1	rs215039626	CTTTT	.	-	.	-
15	50533406		Trps1	rs234343906	TG	.	-	.	-
15	50533990		Trps1	rs241044836	G	.	-	.	-
15	50534042		Trps1	rs255287608	ATT	.	-	.	-
15	50534195		Trps1	-	TAAGGTTTAGAATTTCGCCTATGCA	.	-	.	-
15	50534238		Trps1	rs251219079	C	.	-	.	-
15	50534283		Trps1	rs261694492	GA	.	-	.	-
15	50534422		Trps1	-	T	.	-	.	-
15	50534450		Trps1	-	CA	.	-	.	-
15	50534493		Trps1	rs245632835	TG	T	feature_truncation	.	-
15	50534543		Trps1	-	TA	.	-	.	-
15	50534544		Trps1	rs247449681	AC	.	-	.	-
15	50534771		Trps1	-	AG	.	-	.	-
15	50534843		Trps1	rs239796579	G	GA	feature_elongation	.	-
15	50535031		Trps1	rs261422743	TG	.	-	.	-
15	50535085		Trps1	rs213682520	GA	.	-	.	-
15	50535168		Trps1	rs220425301	AAT	.	-	.	-
15	50535800		Trps1	rs222889394	T	.	-	.	-
15	50536260		Trps1	rs227511773	TG	.	-	.	-
15	50536681		Trps1	rs239340267	TA	.	-	.	-
15	50536698		Trps1	-	AAAAAAACAAAAAAAAAACAAAAAC	.	-	.	-
15	50536704		Trps1	rs217298009	AC	.	-	.	-
15	50536705		Trps1	rs258768213	C	.	-	.	-
15	50536849		Trps1	rs222742403	G	.	-	.	-
15	50537217		Trps1	rs261555152	GTATTATAAAC	.	-	.	-
15	50537318		Trps1	rs227572006	G	.	-	.	-
15	50537657		Trps1	rs239039773	T	.	-	.	-
15	50537737		Trps1	rs264962599	GA	.	-	.	-
15	50538030		Trps1	rs262725571;rs262127062	TCA	T	feature_truncation	.	-
15	50538060		Trps1	-	A	.	-	.	-
15	50538403		Trps1	rs249035758	ATC	.	-	.	-
15	50539929		Trps1	-	G	.	-	.	-
15	50539932		Trps1	rs219432548	T	.	-	.	-
15	50540093		Trps1	rs228203460;rs232150489	AT	.	-	.	-
15	50540385		Trps1	rs249085943	CAGTCG	.	-	.	-
15	50540742		Trps1	rs246025913	C	.	-	.	-
15	50540766		Trps1	-	CT	.	-	.	-
15	50540781		Trps1	-	AAC	.	-	.	-
15	50540782		Trps1	rs237056711;rs264101847	A	.	-	.	-
15	50541047		Trps1	rs242551328	GCT	.	-	.	-
15	50541424		Trps1	-	T	.	-	.	-
15	50541425		Trps1	rs230389516	CAAAAAAAAA	.	-	.	-
15	50541449		Trps1	rs220442774	A	.	-	.	-
15	50541455		Trps1	-	AAAAC	A	feature_truncation	.	-
15	50541456		Trps1	rs237453982	AAAC	.	-	.	-
15	50541459		Trps1	-	CA	.	-	.	-
15	50541464		Trps1	-	A	.	-	.	-
15	50541805		Trps1	rs224074679	G	.	-	.	-
15	50542443		Trps1	rs229653327;rs260759759	GA	GAA	feature_elongation	.	-
15	50542726		Trps1	rs260040320	T	.	-	.	-
15	50542972		Trps1	rs251900479;rs252529657	C	.	-	.	-
15	50542981		Trps1	rs257604526	T	.	-	.	-
15	50543035		Trps1	rs214272887	TG	.	-	.	-
15	50544082		Trps1	rs223056345	TG	.	-	.	-
15	50544780		Trps1	rs225640781	AC	.	-	.	-
15	50545348		Trps1	rs221557856	TAAG	.	-	.	-
15	50545420		Trps1	rs236594927	GAAAAA	GAA	-	.	-
15	50545571		Trps1	rs239833972	AT	.	-	.	-
15	50545936		Trps1	rs249371936	A	.	-	.	-
15	50545959		Trps1	rs212543974	T	.	-	.	-
15	50545969		Trps1	-	A	.	-	.	-
15	50546120		Trps1	-	A	.	-	.	-
15	50546121		Trps1	rs249498648	A	AAAC	feature_elongation	.	-
15	50546141		Trps1	rs247169681	ACAAC	.	-	.	-
15	50546144		Trps1	rs223380100	AC	.	-	.	-
15	50546146		Trps1	rs222196327	A	.	-	.	-
15	50546761		Trps1	-	CT	.	-	.	-
15	50546764		Trps1	rs224986952	T	.	-	.	-
15	50546765		Trps1	rs247682593	A	.	-	.	-
15	50546766		Trps1	-	A	.	-	.	-
15	50546776		Trps1	rs228612700	C	caaaaaaaacaa/caa	feature_elongation	.	-
15	50546781		Trps1	rs250103126	A	.	-	.	-
15	50546784		Trps1	-	AAC	.	-	.	-
15	50547865		Trps1	rs215910867	C	.	-	.	-
15	50548005		Trps1	rs249407355	A	.	-	.	-
15	50548114		Trps1	-	AGAGT	.	-	.	-
15	50548223		Trps1	rs244301881	ATGAG	.	-	.	-
15	50548881		Trps1	rs225659795	AT	.	-	.	-
15	50549337		Trps1	rs236942754	GTTAC	.	-	.	-
15	50549863		Trps1	rs258231453	ACT	.	-	.	-
15	50550204		Trps1	-	TATAG	.	-	.	-
15	50550231		Trps1	rs242639796	AGATAGATAGATAGATAGATAGAAC	.	-	.	-
15	50550239		Trps1	-	AGATAGATAGATAGAAC	.	-	.	-
15	50550251		Trps1	rs214719854	AGAAC	A	feature_truncation	.	-
15	50550537		Trps1	rs230140141	A	.	-	.	-
15	50550832		Trps1	-	GA	.	-	.	-
15	50550854		Trps1	rs228633112	C	.	-	.	-
15	50550891		Trps1	rs215319485;rs235464238	CAA	CAAA	-	.	-
15	50551241		Trps1	rs226594935	T	.	-	.	-
15	50552465		Trps1	-	C	.	-	.	-
15	50552599		Trps1	-	AG	.	-	.	-
15	50552639		Trps1	rs226437920	ATGT	.	-	.	-
15	50552904		Trps1	rs255381561	C	.	-	.	-
15	50553034		Trps1	rs264520889	A	.	-	.	-
15	50553328		Trps1	rs232435838	CT	.	-	.	-
15	50553776		Trps1	rs239210466	A	.	-	.	-
15	50553883		Trps1	rs252666486	C	.	-	.	-
15	50554027		Trps1	rs226126944	C	.	-	.	-
15	50554057		Trps1	rs240193512	ATT	.	-	.	-
15	50554310		Trps1	rs259647502	TA	.	-	.	-
15	50555071		Trps1	rs256742713	G	.	-	.	-
15	50555280		Trps1	rs237800919	A	.	-	.	-
15	50556157		Trps1	rs214475926	AG	.	-	.	-
15	50556394		Trps1	rs264017222	TA	.	-	.	-
15	50556852		Trps1	rs218018031	G	.	-	.	-
15	50557146		Trps1	rs223864507;rs225618635	AT	.	-	.	-
15	50557167		Trps1	-	TTTC	.	-	.	-
15	50557170		Trps1	rs261933375	CT	CTT	feature_elongation	.	-
15	50557180		Trps1	-	CT	.	-	.	-
15	50557762		Trps1	rs225401807;rs263601390	TTCTCTCTC	.	-	.	-
15	50557797		Trps1	rs225371218	AGTGTGTGTGTGTGTGTGTGTGTGTGT	A	feature_truncation	.	-
15	50557822		Trps1	-	GTGTGTGTGTGTGTGTGTGT	.	-	.	-
15	50557824		Trps1	-	GTGTGTGTGTGTGTGTGT	.	-	.	-
15	50558867		Trps1	rs231941802	ATT	AT	-	.	-
15	50559240		Trps1	rs242782536	AAT	.	-	.	-
15	50559338		Trps1	rs244083608	A	.	-	.	-
15	50559541		Trps1	rs232837221	A	.	-	.	-
15	50559543		Trps1	rs258289716	C	.	-	.	-
15	50559686		Trps1	rs214946088	GCT	G	feature_truncation	.	-
15	50559691		Trps1	-	C	.	-	.	-
15	50559694		Trps1	rs225206199	TC	.	-	.	-
15	50559768		Trps1	rs263659477	G	.	-	.	-
15	50560410		Trps1	rs234660963	GGTGTGTGTGTGTGTGTATGTATATGTAT	.	-	.	-
15	50560435		Trps1	rs216146628	G	.	-	.	-
15	50560504		Trps1	-	C	.	-	.	-
15	50560506		Trps1	rs246829436	TACATAC	.	-	.	-
15	50560522		Trps1	rs237834279	TACATACATACATACATACAC	.	-	.	-
15	50560526		Trps1	rs233159871	TACATACATACATACAC	T	feature_truncation	.	-
15	50560564		Trps1	-	TAC	.	-	.	-
15	50560588		Trps1	rs224715839	TATACATAC	.	-	.	-
15	50560606		Trps1	rs242898344	TAC	.	-	.	-
15	50560612		Trps1	-	TAC	.	-	.	-
15	50560636		Trps1	rs237239784	T	.	-	.	-
15	50560639		Trps1	-	A	.	-	.	-
15	50560658		Trps1	rs235833840	T	.	-	.	-
15	50560726		Trps1	rs248573065	TACACACAC	TATACACACACACACAC	-	.	-
15	50560750		Trps1	rs253268922	CAT	.	-	.	-
15	50561277		Trps1	-	C	.	-	.	-
15	50561323		Trps1	rs258968703	A	.	-	.	-
15	50561403		Trps1	-	G	.	-	.	-
15	50561407		Trps1	rs245999724	A	.	-	.	-
15	50561427		Trps1	rs265482775	C	.	-	.	-
15	50561498		Trps1	rs247440897	CAGAG	.	-	.	-
15	50561578		Trps1	rs234620140	A	.	-	.	-
15	50561787		Trps1	rs238888947	GT	.	-	.	-
15	50562979		Trps1	-	A	.	-	.	-
15	50562980		Trps1	rs262137347;rs212738715	G	GAA	feature_elongation	.	-
15	50562991		Trps1	rs239884174	A	.	-	.	-
15	50562993		Trps1	rs223215011	A	aaac/aaaaaa	feature_elongation	.	-
15	50562999		Trps1	-	GTTTTTT	.	-	.	-
15	50563008		Trps1	-	TTC	.	-	.	-
15	50563009		Trps1	rs251732554	TCCCC	.	-	.	-
15	50563147		Trps1	rs261256264	T	.	-	.	-
15	50563562		Trps1	rs258901173;rs259034609	AC	.	-	.	-
[truncated: 49,614 more rows]

## Sheet: Sanger funct HeJB6J SWDlen CI 
Chr	Position	Gene	Assessed by RNAseq?	RNAseq q value <0.1?	dbSNP	C57BL/6J nucleotide	C3HHeJ nucleotide	C3HHeJ consequence
15	50653875	Trps1	yes		rs32398060	C	G	missense_variant
15	51801507	Rad21	yes		rs31823992	A	G	missense_variant
15	51872035	Aard	yes		rs31595794	A	T	missense_variant
15	52309566	Gm10020			rs250191401	C	T	missense_variant
15	52309582	Gm10020			rs213411529	T	G	missense_variant
15	58395668	Fer1l6			rs224463694	A	G*	missense_variant upstream_gene_variant
15	58406877	Fer1l6			rs246604575	C	T	missense_variant
15	58421963	Fer1l6			rs36402107	C	G*	missense_variant upstream_gene_variant
15	58426402	Fer1l6			rs264149523	A	G*	initiator_codon_variant splice_region_variant
15	58705334	Trmt12	yes		rs36461259	G	A	missense_variant
15	59826029	Gm7713			rs234209737	T	C	missense_variant
15	59826133	Gm7713			rs253885872	A	G	missense_variant
15	59826369	Gm7713			rs233739847	C	T	stop_gained
15	59846784	4933412E24Rik			rs46985460	A	G	missense_variant
15	63656657	Gsdmc2			rs252605414	G	C	missense_variant
15	63680212	Gsdmcl1			-	A	AG*	splice_acceptor_variant feature_elongation
15	63934016	Asap1	yes		rs32149275	A	G*	missense_variant non_coding_exon_variant nc_transcript_variant downstream_gene_variant
15	65710324	Oc90			rs37801756	T	C*	missense_variant downstream_gene_variant
15	65729228	Oc90			rs36369457	A	C*	missense_variant splice_region_variant
15	66117751	Kcnq3	yes	yes	rs234166310	AGCCGCCCCC	A	inframe_deletion
15	66212131	Lrrc6	yes		rs37602785	T	C*	missense_variant splice_region_variant
15	66373143	Tmem71	yes		rs256104481	T	A	missense_variant
15	66513425	Tg			rs46154805	T	C	missense_variant
15	66513512	Tg			rs258117026	G	A	missense_variant
15	66513833	Tg			rs45723490	A	G	missense_variant
15	66513939	Tg			rs46267388	G	C	missense_variant
15	66514131	Tg			rs49072131	T	C	missense_variant
15	66514341	Tg			rs46051852	G	A	missense_variant
15	66515292	Tg			rs49870850	A	G	missense_variant
15	66515444	Tg			rs47142894	G	A*	missense_variant upstream_gene_variant
15	66515778	Tg			rs218167289	T	C*	missense_variant upstream_gene_variant
15	66516980	Tg			rs246218014	A	T*	missense_variant upstream_gene_variant
15	66516981	Tg			rs215400564	A	C*	missense_variant upstream_gene_variant
15	66521532	Tg			rs227028266	C	T*	missense_variant nmd_transcript_variant
15	66521547	Tg			rs241125600	T	C*	missense_variant nmd_transcript_variant
15	66521548	Tg			rs254946190	A	G*	missense_variant nmd_transcript_variant
15	66521562	Tg			rs223899290	A	C*	missense_variant splice_region_variant nmd_transcript_variant
15	66523865	Tg			rs256956167	A	C*	missense_variant nmd_transcript_variant
15	66530122	Tg			rs51010854	A	G*	missense_variant 3_prime_utr_variant nmd_transcript_variant upstream_gene_variant
15	66556775	Tg			rs241663399	C	T*	missense_variant 3_prime_utr_variant nmd_transcript_variant non_coding_exon_variant nc_transcript_variant
15	68011486	Zfat	yes		rs6403776	T	C	missense_variant
15	71636657	Col22a1	yes		rs46351738	T	C*	missense_variant upstream_gene_variant
15	71650489	Col22a1	yes		rs48540992	T	A	missense_variant
15	71652389	Col22a1	yes		rs32013441	A	G	missense_variant
15	72682923	Trappc9	yes		rs31430670	C	A	missense_variant
15	74370215	Bai1	yes	yes	rs51566550	G	A*	missense_variant 5_prime_utr_variant
15	74653732	Hemt1			-	A	G*	missense_variant upstream_gene_variant
15	74710331	2010109I03Rik			rs260070619	C	T	missense_variant
15	74810546	Ly6i			rs48664280	T	C	missense_variant
15	74813473	Ly6i			rs31638661	G	T	missense_variant
15	74825780	Ly6a	yes	yes	rs213983347	A	G	missense_variant
15	74825909	Ly6a	yes	yes	rs32279213	T	C*	missense_variant splice_region_variant
15	74878877	Ly6c1	yes		-	T	C	missense_variant
15	74938993	Ly6c2			-	T	C	missense_variant
15	74939115	Ly6c2			-	T	c	missense_variant
15	75543724	Rhpn1	yes		rs32220845	A	G*	missense_variant 3_prime_utr_variant nmd_transcript_variant non_coding_exon_variant nc_transcript_variant

## Sheet: RNA seq B6J FeJ all Chr 15
symbol	description	chr	start	end	strand	ensid	fstat genotype	fstat strain	unadj pval genotype	unadj pval strain	unadj pval strain x geno	% mut/wt thal	% mut/wt ssctx	FDR q val	B6J_wt_ssctx_a	B6J_wt_ssctx_b	B6J_wt_ssctx_c	B6J_mut_ssctx_g	B6J_mut_ssctx_h	B6J_mut_ssctx_i	B6J_wt_thal_a	B6J_wt_thal_b	B6J_wt_thal_c	B6J_mut_thal_g	B6J_mut_thal_h	B6J_mut_thal_i	FeJ_wt_ssctx_d	FeJ_wt_ssctx_e	FeJ_wt_ssctx_f	FeJ_mut_ssctx_j	FeJ_mut_ssctx_k	FeJ_mut_ssctx_l	FeJ_wt_thal_d	FeJ_wt_thal_e	FeJ_wt_thal_f	FeJ_mut_thal_j	FeJ_mut_thal_k	FeJ_mut_thal_l
Sepp1	selenoprotein P, plasma, 1	15	3218547	3230507	+	ENSMUSG00000064373	2.0248	11.347	0.170962	0.00322599	0.37669	-0.0147911	-0.0311252	0.0347105	12.6669	12.4414	12.5622	12.5063	12.6068	12.5142	13.4867	13.372	13.4524	13.5764	13.4342	13.5443	12.2337	12.1455	12.1188	12.3082	12.2938	12.3929	13.2542	13.2417	13.219	13.3168	13.1675	13.2677
Ghr	growth hormone receptor	15	3267760	3533492	-	ENSMUSG00000055737	0.0630622	0.0939663	0.804416	0.762528	0.0169025	-0.0295053	-0.0193797		7.92598	7.78247	7.87109	7.69178	7.73565	7.53524	7.68928	7.59246	7.44964	7.39624	7.30004	7.58179	7.65374	7.9317	7.53713	7.77695	7.66721	7.65558	7.03636	7.50592	7.5184	7.58869	7.71269	7.78772
Fbxo4	F-box protein 4	15	3915445	3929573	-	ENSMUSG00000022184	0.0557501	0.725826	0.81587	0.404851	0.866003	0.00716415	-0.0379886		6.27271	6.57467	6.61514	6.88923	6.79079	6.19501	6.34414	6.64386	6.78338	6.78801	6.31211	6.68489	5.87613	6.5323	6.31474	6.28218	6.52384	6.5003	6.80574	6.46639	6.64089	6.67557	6.61958	6.66146
AW549877	expressed sequence AW549877	15	3932036	3945752	-	ENSMUSG00000041935	0.550957	0.828433	0.467005	0.374129	0.016355	-0.00512068	-0.00986955		11.0421	10.968	11.1283	11.0442	10.9426	10.8425	11.443	11.3009	11.506	11.3403	11.3031	11.2391	10.9722	10.9712	10.8679	11.1847	10.9345	11.1991	11.3979	11.3463	11.3303	11.3975	11.2851	11.351
BC037032	cDNA Sequence BC037032	15	3971686	3977402	-	ENSMUSG00000087221	0.0111895	0.0171455	0.916866	0.897199	0.156931	-0.022801	-0.0766605		4.40112	5.23434	4.90952	4.92502	4.71907	3.81195	5.59674	5.25361	5.43214	5.38744	4.93254	5.3328	4.65649	4.26288	4.51059	4.59083	3.92111	4.8496	4.74765	5.62271	5.54087	5.8384	5.77447	5.43813
Oxct1	3-oxoacid CoA transferase 1	15	3976383	4105344	+	ENSMUSG00000022186	0.0725481	1.86781	0.790566	0.187682	0.225196	-0.0153235	-0.00473559	0.909408	12.9857	12.9578	13.0604	13.08	12.9509	12.9209	13.2736	13.2117	13.3308	13.3209	13.1164	13.1749	12.9138	12.9358	12.9695	13.0616	12.9764	13.0174	12.8827	13.1319	13.1913	13.1316	13.0417	13.0971
Plcxd3	phosphatidylinositol-specific phospholipase C, X domain containing 3	15	4325491	4525553	+	ENSMUSG00000049148	0.694578	0.990438	0.414966	0.332142	0.304867	-0.0609373	-0.0144319		7.17785	7.16639	7.65696	7.44025	7.27622	7.48591	6.67385	6.24793	6.58174	5.55974	6.16011	6.28634	7.25011	7.21347	7.2201	6.87586	6.74316	6.83095	6.16189	6.38393	5.76921	6.57871	6.554	6.88887
C7	complement component 7	15	4938822	5013662	-	ENSMUSG00000079105	0.154589	0.0104848	0.698565	0.919516	0.0241351	-0.326955	-0.0282718		3.49135	3.88435	3.52768	3.04793	3.79079	2.22538	2.13469	3.80735	3.58174	3.23781	1.40522	2.24194	3.26142	3.67432	3.65939	4.74875	4.62768	3.62583	0.576925	2.61839	3.21462	3.21614	2.44966	3.11126
Card6	caspase recruitment domain family, member 6	15	5045981	5058539	-	ENSMUSG00000041849	0.906626	4.33652	0.352968	0.0510576	0.0881656	-0.162992	-0.0704065	0.196222	5.8489	5.97951	5.87818	5.63289	5.55633	5.5162	5.94204	6.04439	6.0147	5.85033	5.86465	6.26431	5.43135	5.48167	5.54691	5.63011	5.45775	5.70384	3.73881	5.68741	5.64089	6.08121	5.61958	5.69622
Rpl37	ribosomal protein L37	15	5066613	5069140	+	ENSMUSG00000041841	2.87787	1.24152	0.106128	0.279075	0.798895	0.00148241	0.00433503	0.975006	10.8789	10.8028	10.7829	10.8035	10.7313	10.8398	10.8733	11.0809	10.8671	10.946	10.9262	10.9997	10.8371	10.8077	10.9606	10.6566	10.8488	10.8002	10.7773	11.0113	11.0813	11.0063	11.0288	10.9877
Prkaa1	protein kinase, AMP-activated, alpha 1 catalytic subunit	15	5093861	5131899	+	ENSMUSG00000050697	1.39789	1.8798	0.251662	0.186336	0.00834233	-0.00674058	-0.010216	0.907894	9.5735	9.50441	9.62782	9.61778	9.33923	9.37851	9.97074	9.87344	9.856	9.83347	9.75616	9.8137	9.51881	9.34674	9.54691	9.72964	9.49393	9.57485	9.81533	9.82979	9.85487	10.029	9.76978	9.91309
Ttc33	tetratricopeptide repeat domain 33	15	5135525	5168336	+	ENSMUSG00000022151	0.927984	0.251017	0.347489	0.622115	0.705458	-0.000292988	-0.0126336		9.85329	9.95825	9.98054	10.074	9.91181	10.0916	10.028	9.86573	9.94631	10.0154	9.93465	9.92666	9.78106	9.78545	9.84919	10.0046	9.75237	9.89885	10.0343	9.93671	9.86028	9.93626	9.86751	9.94957
Ptger4	prostaglandin E receptor 4 (subtype EP4)	15	5156661	5194187	-	ENSMUSG00000039942	0.408337	0.0126291	0.530444	0.911702	0.713854	-0.0904999	0.00824983		5.7008	5.78247	4.90619	5.4329	5.65552	5.44777	4.7866	4.70044	4.50774	4.23781	3.86465	4.82691	5.66742	5.19788	5.65939	5.46891	5.10161	5.62583	4.82485	4.10382	3.79959	4.01404	3.58716	3.88887
Dab2	disabled 2, mitogen-responsive phosphoprotein	15	6249788	6390712	+	ENSMUSG00000022150	4.02855	2.5663	0.0591769	0.125658	0.644131	0.00859467	-0.0147872	0.336625	8.05359	8.1044	8.0945	7.76675	7.90349	8.03274	8.7494	8.82972	8.67344	8.64962	8.71356	9.02658	7.71263	8.04936	8.13188	7.99268	7.81531	7.99507	8.72667	8.91485	8.83667	8.98621	8.66689	8.80773
Fyb	FYN binding protein	15	6529871	6613313	+	ENSMUSG00000022148	0.635766	19.0234	0.4351	0.00033582	0.513942	-0.084359	-0.104688	0.00728825	5.81328	6.50238	6.56102	6.44025	6.02345	6.39531	5.91605	6	6.06717	6.36119	6.40522	6.06161	5.47088	5.84424	5.58539	5.69381	5.86409	5.3628	5.38428	5.58187	5.50003	5.32765	5.41313	5.80566
Gm2245	predicted gene 2245	15	6554341	6604303	-	ENSMUSG00000089647	0.00312786	0.459686	0.955984	0.505944	0.963132	0.179849	-0.00472452		3.46955	3.02662	4.1327	3.26205	3.33478	3.9767	3.63931	3.69933	2.25981	2.20866	3.58473	2.84364	3.58479	3.48167	3.51219	3.09059	3.25477	4.05046	4.90963	2.88143	3.53366	3.73503	3.58847	3.30751
Rictor	RPTOR independent companion of MTOR, complex 2	15	6658381	6750398	+	ENSMUSG00000050310	0.312614	1.25577	0.582612	0.276418	0.104892	-0.0214067	0.000561481	0.97384	10.5357	10.6221	10.7449	10.7204	10.8308	10.6752	10.8186	10.7039	10.7284	10.4556	10.6987	10.5851	10.6343	10.6372	10.6492	10.7653	10.5663	10.7846	10.3583	10.5899	10.6123	10.7575	10.6756	10.6438
Osmr	oncostatin M receptor	15	6763577	6824969	-	ENSMUSG00000022146	0.726377	0.542812	0.404675	0.47027	0.528367	0.0088541	0.047804		6.44555	6.4022	6.92	6.32095	6.30176	6.34086	6.61042	6.65821	6.85973	6.43046	7.06343	6.43177	7.09431	7.01417	6.60425	6.69065	6.7976	7.15635	6.80574	6.91117	6.58966	6.6376	6.80016	6.67895
Lifr	leukemia inhibitory factor receptor	15	7079572	7147489	+	ENSMUSG00000054263	0.362989	0.358826	0.553974	0.556235	0.0793458	0.00274243	-0.011401		10.3862	10.3718	10.4115	10.3116	10.4982	10.3322	10.061	9.86109	9.81056	9.70192	10.0688	9.8912	10.4401	10.2536	10.1205	10.5162	10.4076	10.5683	9.89434	9.96712	9.95272	9.98998	9.97008	10.0999
Egflam	EGF-like, fibronectin type III and laminin G domains	15	7156120	7348395	-	ENSMUSG00000042961	0.195811	2.00815	0.66312	0.172645	0.75381	0.0344966	0.0223699	0.895497	6.81328	6.20628	6.63202	6.78489	6.42306	6.13227	7.80711	7.79442	7.47898	7.79678	7.8061	8.0233	6.70437	6.67432	6.7125	6.40771	6.88402	6.91534	7.98632	7.95468	7.93572	7.81817	7.90252	7.95496
Wdr70	WD repeat domain 70	15	7823055	8049209	-	ENSMUSG00000039828	0.0209455	0.107239	0.886452	0.746891	0.967732	0.00770959	0.00194084		7.79513	8.00988	7.64038	8.00212	7.64877	8.03274	7.85579	7.96	7.70276	7.96184	7.75395	7.71768	7.81601	7.81387	7.86102	8.06306	7.66721	7.87376	7.61035	8.01071	8.07881	7.82663	7.94151	8.00435
Nup155	nucleoporin 155	15	8059313	8109857	+	ENSMUSG00000022142	2.39623	3.40153	0.138124	0.0807863	0.131625	-0.0303159	0.00328023	0.260022	8.88795	8.86787	8.88875	8.9387	8.94865	8.97581	9.08013	8.84235	9.05098	8.75688	8.80182	8.79269	8.87981	8.92224	8.92992	8.71999	8.96158	8.95974	8.44111	8.89638	8.81825	8.81392	9.02558	8.96568
2410089E03Rik	RIKEN cDNA 2410089E03 gene	15	8119106	8221158	+	ENSMUSG00000039801	0.825357	1.13337	0.374999	0.300401	0.228922	-0.0148278	0.00243819	0.98982	10.1352	10.3121	10.4819	10.3578	10.5336	10.3649	10.251	10.4019	10.2946	9.95009	10.3271	10.2588	10.3894	10.2499	10.3654	10.2789	10.3691	10.4403	10.2617	10.1498	10.0773	10.338	10.4553	10.2812
Nipbl	Nipped-B homolog (Drosophila)	15	8241225	8394463	-	ENSMUSG00000022141	0.276275	0.139	0.605234	0.713404	0.181941	-0.010472	0.0109776		10.0707	10.0561	10.1887	10.0252	10.0463	10.1462	10.3635	10.0647	10.2738	9.98888	10.1568	10.1169	10.3085	10.1742	10.1656	10.2099	10.0123	10.3139	10.1219	10.1118	10.1468	10.2807	10.2059	10.1572
Slc1a3	solute carrier family 1 (glial high affinity glutamate transporter), member 3	15	8584124	8660764	-	ENSMUSG00000005360	1.20421	0.00191773	0.286195	0.965527	0.0376512	-0.00677957	-0.0139106		13.797	13.6627	13.67	13.7069	13.5557	13.524	13.1345	13.0326	13.012	13.1205	13.0482	13.147	13.4952	13.5516	13.5108	13.5823	13.6008	13.4988	12.9196	13.0156	12.9783	13.0623	13.2885	13.1671
Ranbp3l	RAN binding protein 3-like	15	8918426	8996300	+	ENSMUSG00000048424	0.193146	1.97565	0.665269	0.175991	0.350668	-0.133747	-0.0451347	0.900204	7.42209	6.4022	7.01311	6.82052	6.37576	6.74894	4.52701	3.90689	5.06717	4.82277	4.49268	4.8858	6.43135	6.71871	6.74685	6.67075	6.76153	6.62583	3.16189	3.9969	4.53655	4.65671	4.65129	4.00435
Nadkd1	NAD kinase domain containing 1	15	9001009	9040244	+	ENSMUSG00000022253	1.46848	0.169934	0.240442	0.684784	0.0802673	-0.0218892	-0.00669135		9.99518	9.99667	9.95562	10.0309	9.93851	9.87643	10.3791	10.3465	10.3178	10.4149	10.227	10.2932	9.94266	9.84674	9.95768	9.92499	9.90277	10.0028	10.0808	10.2579	10.0252	10.2194	10.2989	10.2213
Skp2	S-phase kinase-associated protein 2 (p45)	15	9041742	9070207	-	ENSMUSG00000054115	0.18187	0.384362	0.674563	0.542643	0.146042	0.018966	0.0030604		7.62063	7.00988	7.62361	7.04793	7.5669	7.24033	7.0772	6.9542	6.90367	6.28844	7.19964	6.98341	7.18029	7.68554	7.4564	7.72964	7.48012	7.54337	7.23514	7.02438	7.0726	7.24167	7.60346	7.11126
Lmbrd2	LMBR1 domain containing 2	15	9070326	9127206	+	ENSMUSG00000039704	1.44129	0.386124	0.244685	0.541728	0.389742	0.00445164	-0.004188		10.665	10.8333	10.8693	10.8829	10.7964	10.794	9.98488	9.72451	9.93753	9.46663	9.82096	9.86033	10.8944	10.6827	10.6549	10.925	10.6451	11.0105	9.72158	10.0613	9.99598	9.87026	9.82122	9.97633
Il7r	interleukin 7 receptor	15	9435916	9459631	-	ENSMUSG00000003882	0.0979831	2.75125	0.757673	0.113596	0.319978	0.252698	0.0146885	0.317291	3.49135	3.59485	3.20575	2.46297	2.79079	3.44777	3.30461	3.80735	2.58174	4.01542	2.72715	3.56387	3.26142	3.25928	3.92242	3.96025	3.77968	4.26326	3.57693	4.54439	4.02198	4.57871	4.58716	3.11126
Spef2	sperm flagellar 2	15	9507948	9678623	-	ENSMUSG00000072663	0.00356838	0.844957	0.95299	0.369506	0.0306913	-0.0424684	-0.0154404		3.07631	4.00988	2.79072	3.63289	3.05383	2.96235	6.22215	6.42626	6.0927	6.62028	6.35942	6.76551	3.06878	2.99624	3.65939	2.08578	1.45775	1.45591	5.70621	6.02438	6.21462	5.90064	6.50277	5.30391
Prlr	prolactin receptor	15	10106993	10303504	+	ENSMUSG00000005268	0.0716652	1.76657	0.791812	0.199547	0.0962645	0.00045592	-0.08579	0.919389	4.39824	4.94848	4.72932	5.36986	5.37576	5.7697	8.20615	8.13443	8.18463	7.90619	8.18001	7.90728	3.96186	4.48167	4.42492	3.50082	4.04272	2.45591	8.10049	7.88143	8.55447	8.19668	8.09927	8.03183
Dnajc21	DnaJ (Hsp40) homolog, subfamily C, member 21	15	10376511	10400271	-	ENSMUSG00000044224	0.258281	0.0079394	0.617153	0.929932	0.033011	0.00752859	0.0200866		9.67374	9.55163	9.57862	9.88503	9.72389	10.3461	9.04458	9.01959	8.82967	9.14813	8.80182	9.09681	9.93562	9.92461	9.52233	9.50925	9.5973	9.61578	9.12767	8.97594	8.9927	9.04178	8.87592	9.07869
Brix1	BRX1, biogenesis of ribosomes, homolog (S. cerevisiae)	15	10404534	10415702	-	ENSMUSG00000022247	0.0229455	3.1587	0.881196	0.0915357	0.431248	-0.0318997	-0.0160645	0.279824	8.81328	8.82153	8.84238	8.838	8.79079	8.85959	8.96758	8.76487	8.93224	9.15497	8.81885	8.92494	8.80832	8.59318	8.65034	8.744	8.72454	8.92759	8.33181	8.70161	8.78068	8.83085	8.68615	8.7133
Rad1	RAD1 homolog (S. pombe)	15	10415773	10428818	+	ENSMUSG00000022248	0.805094	0.264322	0.380804	0.613094	0.708993	-0.0250506	-0.00303129		7.66127	7.63516	7.76914	7.75841	7.68416	7.68831	7.58689	7.51009	7.69628	7.78871	7.71064	7.57671	7.52577	7.78378	7.6861	7.72588	7.52664	7.71311	7.45957	7.387	7.3757	7.52502	7.6824	7.14877
Rai14	retinoic acid induced 14	15	10498734	10644386	-	ENSMUSG00000022246	3.38433	0.428137	0.0814975	0.520747	0.809529	0.00819153	0.0158051		7.97517	7.96408	8.06373	7.68213	7.79079	7.64042	6.42009	6.53916	6.59966	6.23781	6.23811	6.8118	8.0816	7.96894	8.33181	7.66069	7.77064	8.11412	6.43491	6.94032	6.34391	6.67557	6.23626	6.23464
Amacr	alpha-methylacyl-CoA racemase	15	10911511	10926379	+	ENSMUSG00000022244	3.64389	14.5887	0.0714972	0.00115705	0.710361	-0.0339622	-0.0196445	0.0173181	7.56817	7.71032	7.77561	7.70137	7.80872	7.79017	7.70455	7.87036	7.85973	7.80549	7.69984	7.71768	7.38036	7.41578	7.80506	7.41969	7.71514	7.3628	7.31839	7.66279	7.65757	7.60845	7.44966	7.48382
Rxfp3	relaxin family peptide receptor 3	15	10963472	10967723	-	ENSMUSG00000060735	0.0859311	0.0171218	0.772593	0.897269	0.734829	-0.0617183	0.058305		5.77675	5.33181	5.49116	5.55043	5.99243	5.59461	4.65825	5.61471	5.1667	5.01542	5.5345	5.41187	5.75328	5.92224	5.89205	6.02438	5.88402	5.88217	4.89885	4.61839	4.96951	5.16367	5.21519	4.39137
Adamts12	a disintegrin-like and metallopeptidase (reprolysin type) with thrombospondin type 1 motif, 12	15	10994545	11276622	+	ENSMUSG00000047497	1.28e-05	0.342936	0.997185	0.565031	0.677166	0.125584	0.0321627		3.2987	3.23228	2.52768	2.46297	2.46887	1.64042	3.13469	3.16993	3.42974	3.23781	4.40522	4.0493	2.58335	3.84424	2.92242	3.82275	1.45775	3.91534	2.89885	4.38393	3.67405	4.49625	3.71269	3.88887
Tars	threonyl-tRNA synthetase	15	11313418	11329413	-	ENSMUSG00000022241	0.912	4.54014	0.351578	0.0463918	0.991054	-0.017743	-0.00755189	0.184837	9.37093	9.39934	9.41764	9.27995	9.31749	9.39196	9.55465	9.55075	9.67133	9.73195	9.58761	9.58846	9.28379	9.38512	9.30613	9.28218	9.35862	9.25033	9.13151	9.55149	9.58313	9.53549	9.38747	9.35376
Npr3	natriuretic peptide receptor 3	15	11769651	11835429	-	ENSMUSG00000022206	0.40869	0.216449	0.530268	0.647047	0.439036	0.160112	-0.03929		8.56281	8.68702	8.61514	8.59739	8.78175	8.47962	3.59412	4.39232	3.96025	4.43046	4.31211	4.76551	8.18029	8.32537	8.34308	9.00067	8.40027	8.5003	4.82485	4.29646	4.73818	4.73071	4.29766	4.11126
Sub1	SUB1 homolog (S. cerevisiae)	15	11911094	11926738	-	ENSMUSG00000022205	0.262659	0.436034	0.614205	0.516969	0.0982272	-0.00135345	-0.00721271		11.8997	11.9819	11.9924	11.9909	11.8003	11.7793	12.1705	12.0911	12.2281	12.3564	12.0028	12.0286	11.8426	11.8941	11.8786	12.0664	11.9901	12.0669	12.0956	12.168	12.1768	12.1049	12.0845	12.1634
Zfr	zinc finger RNA binding protein	15	12047586	12115438	+	ENSMUSG00000022201	0.43029	1.75828	0.519712	0.20056	0.0773407	-0.00922738	-0.0115668	0.920658	13.1816	13.1873	13.222	13.2797	13.1779	13.2048	12.8762	12.8378	12.9522	12.8638	12.7495	12.7699	13.0796	13.0316	13.0218	13.1869	13.096	13.1524	12.7142	12.8303	12.7649	12.8049	12.7427	12.7574
Mtmr12	myotubularin related protein 12	15	12134783	12201995	+	ENSMUSG00000039458	3.23346	0.454601	0.0880571	0.508279	0.135731	-0.00848613	0.0131867		10.0819	10.1236	10.1944	10.0423	10.2154	10.2141	8.96441	8.96867	8.86344	8.67838	8.89306	8.84186	10.3058	10.32	10.1751	10.1393	10.1771	10.426	8.65374	8.98995	8.92543	9.0087	9.0286	9.06546
Golph3	golgi phosphoprotein 3	15	12251251	12281022	+	ENSMUSG00000022200	0.0401988	0.182514	0.843223	0.674024	0.999332	0.00784243	-0.0025486		11.1883	11.2411	11.2631	11.1968	11.1925	11.2834	10.9934	10.8803	10.9672	11.0359	10.8759	10.9267	11.2394	11.2008	11.1664	11.3025	11.2342	11.2233	10.9422	11.0447	11.1117	10.9937	10.9399	10.9895
Pdzd2	PDZ domain containing 2	15	12286809	12522311	-	ENSMUSG00000022197	0.473116	2.69487	0.499869	0.117121	0.833048	-0.00266236	-0.0152092	0.322791	11.0716	10.9853	11.1224	11.146	11.3538	11.4053	10.4845	10.2609	10.0959	10.0905	10.5396	10.3725	10.9008	10.8505	10.9234	11.0136	10.9969	11.0115	9.82959	10.4576	10.472	10.3528	10.6862	10.4625
6030458C11Rik	RIKEN cDNA 6030458C11 gene	15	12737932	12754412	-	ENSMUSG00000022195	0.579232	0.811178	0.455956	0.379047	0.0360806	-0.00536004	0.0154471		10.0188	10.1062	10.1643	10.0666	10.1091	10.1019	9.72153	9.633	9.73757	9.62521	9.5345	9.49933	10.243	10.2037	10.3104	10.3242	10.1958	10.3045	9.48382	9.77624	9.6761	9.73746	9.89922	9.73853
Drosha	drosha, ribonuclease type III	15	12754618	12864998	+	ENSMUSG00000022191	5.17585	53.5659	0.0346778	6.12e-07	0.103138	-0.0351496	-0.0270303	5.70399e-05	11.4117	11.448	11.5395	11.4033	11.4033	11.51	11.5745	11.5584	11.5184	11.4156	11.5	11.5712	11.154	11.1348	11.1806	11.1732	11.1177	11.1389	10.9443	11.2499	11.2391	11.2258	11.2806	11.2805
Cdh6	cadherin 6	15	12963955	13103394	-	ENSMUSG00000039385	4.34005	11.4853	0.0509723	0.00308019	0.721921	-0.0484791	-0.0251466	0.0335443	8.85767	8.99098	8.94722	9.02521	8.96472	8.93504	8.71589	8.64746	8.97749	7.98504	8.42759	8.63855	8.70022	8.8036	8.61823	8.73444	8.54522	8.58519	8.21355	8.49614	8.35417	8.1367	8.00425	8.32627
Cdh9	cadherin 9	15	16707856	16786849	+	ENSMUSG00000025370	1.94582	0.693921	0.179133	0.415183	0.65301	0.0658944	-0.00669652		8.35554	8.58983	8.46314	8.65772	8.39368	8.21785	5.08889	4.45943	4.90367	6.3131	5.57515	5.66821	8.25011	8.31094	8.67731	8.50082	8.44075	8.48382	5.66439	5.20335	4.53655	5.10922	6.44966	5.66146
Cdh10	cadherin 10	15	18748702	18943991	+	ENSMUSG00000022321	0.00229802	4.94697	0.962266	0.0384559	0.289335	-0.0147593	-0.0100943	0.164263	10.3163	10.1494	10.2624	10.3364	10.2103	10.2551	10.0295	9.93811	10.124	10.021	10.0107	10.2077	10.2039	10.0985	10.1155	10.2047	10.0446	10.1248	9.7618	9.99864	9.88705	9.89863	9.73876	9.80773
Cdh12	cadherin 12	15	21041207	21519288	+	ENSMUSG00000040452	0.546626	10.6578	0.468736	0.00407737	0.457453	-0.0423137	-0.0635853	0.0408328	9.5735	9.64409	9.73518	9.88293	9.71442	9.6376	8.27935	8.05528	8.63485	7.95402	8.19964	8.09369	9.1773	8.9317	9.0028	9.38347	9.06138	9.35073	7.80574	8.00382	8.10337	7.85173	7.75709	7.88887
Cdh18	cadherin 18	15	22478777	23404173	+	ENSMUSG00000040420	7.76801	1.1117	0.0117487	0.304938	0.311154	0.023597	0.0254802	0.993008	8.78597	8.99857	9.02912	8.96281	8.82642	8.84987	8.7234	8.75489	8.68188	8.60038	8.50325	8.56837	9.15321	9.06663	9.27704	9.06306	9.02761	9.2274	8.70105	9.00382	9.0726	8.84757	8.88595	9.04537
Gm2824	predicted gene 2824	15	24933887	24957095	-	ENSMUSG00000090769	0.0329685	0.940547	0.857841	0.344322	0.59795	0.035722	0.0504549		7.43386	7.87613	7.94046	7.90591	7.96072	7.85959	5.62654	5.2854	4.42974	4.67838	4.10566	5.48987	8.17431	8.02304	8.2262	8.05541	7.89238	8.26326	5.66439	5.20335	5.02198	5.05264	5.88262	5.62583
Basp1	brain abundant, membrane attached signal protein 1	15	25293040	25343519	-	ENSMUSG00000045763	2.26167	1.21422	0.149053	0.284261	0.00107266	-0.00823828	-0.00789685	0.979018	13.0291	13.1492	13.196	13.0326	12.9617	12.9575	12.1794	12.2324	12.2184	12.1592	11.9574	12.12	12.9767	12.9513	13.1353	13.0745	13.1438	13.0526	12.0131	12.1714	12.1439	12.177	12.1288	12.3179
Myo10	myosin X	15	25552280	25743428	+	ENSMUSG00000022272	0.230084	0.557497	0.636937	0.46441	0.732745	0.00737345	0.0176722		9.78137	9.61227	9.6549	9.67971	9.77948	9.70381	10.2445	10.207	10.0164	10.0229	10.1195	10.1859	9.87429	9.87644	9.81117	9.64293	9.73852	9.64079	10.0011	10.2565	10.435	10.3142	10.405	10.2869
Fam134b	family with sequence similarity 134, member B	15	25773019	25903442	+	ENSMUSG00000022270	0.0530491	1.32547	0.820302	0.263896	0.255197	-0.0175059	-0.0121241	0.966977	9.86421	10.0118	9.97889	9.96281	10.0177	10.0263	11.3245	11.2167	11.2987	11.3351	11.0509	11.0898	9.86505	9.87889	9.74897	10.0145	9.85863	9.87587	10.9022	11.123	11.2224	11.1737	11.0429	11.1384
Zfp622	zinc finger protein 622	15	25914121	25928237	+	ENSMUSG00000052253	1.48156	1.65588	0.238433	0.213619	0.533349	-0.0170436	0.01057	0.928294	9.27271	9.35861	9.40297	9.37585	9.3996	9.28788	9.38262	9.53333	9.46194	9.39624	9.31811	9.5995	9.44382	9.39199	9.49481	9.321	9.49118	9.32319	9.14298	9.35175	9.3995	9.46677	9.51359	9.38872
2013-03-11	membrane-associated ring finger (C3HC4) 11	15	26238803	26339331	+	ENSMUSG00000022269	0.0670662	0.0757487	0.798442	0.786114	0.83919	-0.0376594	0.0741408		6.34933	6.15284	6.47254	6.59225	6.69768	6.54731	7.01733	7.16993	6.8144	6.88989	6.55497	6.8858	6.87613	6.86414	6.64124	6.67075	6.74316	6.81346	6.35828	6.89638	6.95609	7.0087	6.77159	7.00435
Fbxl7	F-box and leucine-rich repeat protein 7	15	26472839	26825273	-	ENSMUSG00000043556	4.73484	4.89895	0.0423814	0.0393069	0.0647222	-0.090342	0.374647	0.166755	2.49135	1.42492	2.52768	2.46297	2.05383	3.44777	2.71965	2.58496	3.96025	2.75238	2.40522	4.14883	2.84639	2.67432	3.33746	0.500822	1.45775	1.45591	1.57693	3.46639	3.38455	3.21614	3.12773	2.30391
Ank	progressive ankylosis	15	27396432	27524664	+	ENSMUSG00000022265	2.94328	14.3187	0.102498	0.00125476	0.84719	-0.0112049	-0.00543476	0.0183645	12.5493	12.5857	12.6513	12.5777	12.5855	12.6831	12.2108	12.2644	12.2012	12.1313	12.1713	12.2434	12.5658	12.5214	12.4939	12.5459	12.4901	12.4842	11.9666	12.1353	12.1637	12.1295	12.0845	12.091
Fam105b	family with sequence similarity 105, member B	15	27535674	27560448	-	ENSMUSG00000046034	0.491243	0.288877	0.491869	0.597181	0.472282	-0.0292183	-0.00442522		7.96708	8.13917	8.30379	8.17032	8.14129	8.17958	7.71965	7.70044	7.58174	8.15838	7.8061	7.53656	8.12561	7.9872	8.18921	8.11553	8.22594	8.21746	7.24935	7.53487	7.54554	7.7751	7.77878	7.66146
Fam105a	family with sequence similarity 105, member A	15	27586025	27611253	-	ENSMUSG00000056069	2.7451	7.24835	0.113974	0.0144276	0.976978	0.02201	0.0129755	0.0899769	8.59987	8.54386	8.36562	8.61271	8.5669	8.42832	7.54408	7.18982	7.42974	7.45282	7.42759	7.08743	8.67505	8.57518	8.59012	8.65564	8.55051	8.80906	7.70621	7.43602	7.50924	7.3036	7.79307	7.30391
Trio	triple functional domain (PTPRF interacting)	15	27660407	27955603	-	ENSMUSG00000022263	5.53911	2.50005	0.0295156	0.130347	0.787676	-0.00751652	0.0157075	0.342304	12.0159	12.067	12.1538	12.1225	12.273	12.3177	12.2288	12.2161	12.2191	11.7908	12.1825	12.1701	12.2917	12.2742	12.2398	12.1821	12.2001	12.2848	11.8141	12.2802	12.2941	12.2393	12.1745	12.2405
Dnahc5	dynein, axonemal, heavy chain 5	15	28133507	28401800	+	ENSMUSG00000022262	2.6834	1.26487	0.117854	0.274739	0.29659	-0.0224091	0.0911976	0.972933	6.07631	6.06878	6.43457	5.95482	6.57739	6.31284	7.44757	7.24793	7.61737	7.39624	7.5345	7.8713	6.70437	6.7404	6.82931	6.40771	6.29064	6.38665	7.08472	7.40499	7.32315	7.24167	7.85565	7.31513
Ctnnd2	catenin (cadherin associated protein), delta 2	15	30102348	30959066	+	ENSMUSG00000022240	4.37973	8.35086	0.0500241	0.00938695	0.220101	-0.0106169	-0.00849563	0.0685397	12.3656	12.3337	12.4167	12.3714	12.3978	12.4169	12.2965	12.3233	12.2689	12.0675	12.2338	12.2296	12.2412	12.2714	12.288	12.2164	12.3196	12.2564	11.9145	12.2844	12.2981	12.2558	12.2005	12.2855
Dap	death-associated protein	15	31154140	31204093	+	ENSMUSG00000039168	0.278235	0.797664	0.603966	0.382966	0.603157	-0.0208275	-0.0236287		6.6411	6.55421	6.5456	6.57149	6.77265	6.70651	7.48342	7.31288	7.30421	7.33735	7.50325	7.55483	6.32751	6.13375	6.81319	6.85837	6.76153	6.43319	7.17684	7.32989	7.13349	7.3513	7.26728	7.26969
Ankrd33b	ankyrin repeat domain 33B	15	31221235	31297481	-	ENSMUSG00000022237	0.24454	0.0968154	0.626615	0.759073	0.9859	-0.0623908	0.00519402		11.5227	11.6561	11.6703	11.3751	11.6046	11.7272	6.7494	6.58496	6.75167	7.37297	7.27558	6.90016	11.7909	11.8177	11.4216	11.3689	11.5597	11.6997	6.57693	5.7559	6.50003	6.36298	8.04062	6.11126
2013-03-06	membrane-associated ring finger (C3HC4) 6	15	31385654	31460792	-	ENSMUSG00000039100	0.523147	0.00685904	0.478313	0.934862	0.0127258	-0.00177326	-0.00111733		12.8281	12.9416	12.9594	12.97	12.8817	12.859	12.6114	12.5767	12.6215	12.5262	12.5438	12.5328	12.9064	12.8862	12.8932	13.0298	12.8885	13.0467	12.4419	12.6221	12.6787	12.6913	12.6552	12.7021
Cmbl	carboxymethylenebutenolidase-like (Pseudomonas)	15	31498546	31519874	+	ENSMUSG00000022235	0.76396	0.627067	0.393006	0.438208	0.602762	-0.00648633	0.0163408		7.12071	6.59485	6.59807	6.74837	6.53495	6.39531	6.65825	7.07682	6.94631	7.28844	6.95981	7.14883	6.76922	6.71871	7.15764	6.72964	6.64758	6.64573	6.72667	6.85105	6.96951	7.22896	6.96062	6.41243
Cct5	chaperonin containing Tcp1, subunit 5 (epsilon)	15	31520555	31531602	-	ENSMUSG00000022234	0.0298143	1.83265	0.864738	0.191701	0.979827	-0.0112209	0.00236176	0.913652	11.4906	11.5236	11.5439	11.5297	11.5174	11.5139	11.9111	11.9218	11.8727	12.0285	11.8966	12.0221	11.5715	11.4606	11.6078	11.5615	11.5604	11.5254	11.6631	11.7651	11.8768	11.883	11.8147	11.8348
Fam173b	family with sequence similarity 173, member B	15	31531607	31550982	+	ENSMUSG00000039065	0.58832	13.3574	0.452496	0.00168469	0.620304	-0.0488746	-0.0319809	0.0224507	7.67126	7.75584	7.96064	7.97867	7.98457	7.92582	8.00505	8.30378	8.19055	7.82277	8.16677	8.36607	7.61015	7.5323	7.49733	7.4781	7.52384	7.45591	7.74685	7.98296	7.57217	7.80966	7.96693	7.69622
0610007N19Rik	RIKEN cDNA 0610007N19	15	32170324	32174417	-	ENSMUSG00000090401	1.20063	0.262581	0.286891	0.614258	0.592798	-0.0479321	0.0555478		4.81328	4.33181	4.79072	4.36986	4.63879	4.96235	5.88958	5.97728	5.50774	5.23781	5.10566	5.7338	5.06878	4.84424	4.79689	4.82275	4.04272	4.70384	5.03636	5.61839	5.88705	5.90064	5.554	5.82747
Sema5a	sema domain, seven thrombospondin repeats (type 1 and type 1-like), transmembrane domain (TM) and short cytoplasmic domain, (semaphorin) 5A	15	32174568	32626096	+	ENSMUSG00000022231	3.62674	2.26059	0.0721122	0.149144	0.625526	-0.0139706	0.00455343	0.367348	10.146	10.3733	10.3732	10.1789	10.1073	10.0198	11.8958	11.7356	11.9979	11.6843	11.8194	11.8608	10.3262	10.3485	10.3584	10.2133	9.99108	10.1633	11.4793	11.8409	11.8113	11.8011	11.6498	11.7998
Sdc2	syndecan 2	15	32850478	32964485	+	ENSMUSG00000022261	0.053869	2.27077	0.818944	0.148281	0.400396	-0.0266728	-0.00486071	0.366113	9.95487	9.85328	9.91311	9.99435	9.83519	9.98915	10.2261	9.99577	10.0493	10.1584	10.0309	10.1154	9.89078	9.8036	9.88242	9.84734	9.80869	9.88008	9.64032	9.9777	9.8458	9.92842	10.1235	10.0216
Pgcp	plasma glutamate carboxypeptidase	15	33012884	33524307	+	ENSMUSG00000039007	0.0385725	0.535353	0.846384	0.473294	0.397693	-0.0223635	-0.0132207		8.06878	8.03225	8.04496	7.97076	7.86118	7.85959	8.88958	8.95128	8.76364	8.84831	8.72263	8.60389	7.90528	8.09217	7.82931	7.72964	8.02761	7.87376	8.41613	8.76407	8.82933	8.7262	8.54136	8.57069
Tspyl5	testis-specific protein, Y-encoded-like 5	15	33613631	33617638	-	ENSMUSG00000038984	1.18196	14.4446	0.290557	0.0012081	0.6997	-0.0449033	-0.00997872	0.0178341	10.5655	10.5426	10.5927	10.6773	10.5323	10.6752	9.79469	9.82972	9.80671	9.6949	9.75837	9.91614	10.4648	10.4375	10.4821	10.4938	10.445	10.2998	9.15057	9.53248	9.42651	9.3832	9.57481	9.64376
Mtdh	metadherin	15	34012449	34072141	+	ENSMUSG00000022255	1.74325	0.230162	0.202413	0.63688	0.00847608	-0.0129514	-0.0132277		10.85	10.8741	10.8923	10.9836	10.7612	10.8028	10.8036	10.66	10.7557	10.7308	10.6208	10.5434	10.785	10.6658	10.7341	10.9715	10.7478	10.9164	10.4778	10.6791	10.6451	10.7882	10.69	10.6593
Laptm4b	lysosomal-associated protein transmembrane 4B	15	34167781	34214050	+	ENSMUSG00000022257	1.32791	0.166818	0.263471	0.687521	0.600751	-0.0140362	-0.00670688		11.0517	10.991	10.9822	11.0347	10.9567	10.9578	11.1034	11.1013	11.0346	11.0878	10.9081	11.12	11.0037	10.853	10.9466	11.0332	10.9813	10.9508	10.8507	10.9795	10.9425	10.9586	10.848	10.7978
Matn2	matrilin 2	15	34236436	34365997	+	ENSMUSG00000022324	0.143941	1.66573	0.708601	0.212317	0.0195938	0.014756	-0.0147076	0.927659	8.01491	8.29529	8.33504	8.3937	8.42887	8.15612	6.49224	6.44294	6.48863	7.1309	7.07765	7.31876	8.08797	7.95044	8.24435	8.00862	7.77968	7.97161	6.45957	6.54439	6.70648	6.86821	6.8692	6.39137
Rpl30	ribosomal protein L30	15	34370260	34373395	-	ENSMUSG00000058600	0.00118464	1.3269	0.972902	0.263646	0.82815	-0.0119199	-0.00453998	0.966933	11.0322	10.9118	10.9506	11.047	10.8374	10.9385	11.1358	11.1504	11.1938	11.3634	11.1588	11.194	10.9135	10.8898	10.9419	10.9197	10.9466	10.9397	10.779	11.1059	11.196	11.1136	11.1479	11.0331
BC030476	cDNA sequence BC030476	15	34383067	34403647	+	ENSMUSG00000044726	3.19306	13.7277	0.0899174	0.00150223	0.531608	-0.116462	-0.301996	0.020616	1.49135	2.42492	2.20575	2.78489	3.79079	2.22538	5.96758	5.88264	5.71925	5.63991	5.95981	6.17268	1.26142	0.674316	2.33746	0.500822	2.04272	2.04087	4.82485	4.7559	5.94254	4.99374	5.65129	5.73017
Hrsp12	heat-responsive protein 12	15	34413776	34425010	-	ENSMUSG00000022323	1.55477	0.0394786	0.227586	0.844614	0.849179	-0.00974451	-0.0086138		9.44845	9.30451	9.26375	9.46859	9.13775	9.21407	9.68351	9.60363	9.82396	10.0304	9.63644	9.7811	9.34091	9.17814	9.25632	9.32737	9.23911	9.34769	9.48981	9.62514	9.71247	9.68955	9.69759	9.55657
Pop1	processing of precursor 1, ribonuclease P/MRP family, (S. cerevisiae)	15	34425059	34460403	+	ENSMUSG00000022325	0.425406	9.12462	0.522065	0.00703171	0.159327	-0.0516908	-0.0362879	0.0574641	6.90074	6.91678	7.46314	7.10682	7.59815	7.38189	6.71965	6.67243	6.82967	6.95402	6.83148	6.8858	6.68769	6.95972	6.86102	6.22874	6.98132	6.81346	6.57693	6.36255	6.23699	6.6376	6.52005	6.16189
Nipal2	NIPA-like domain containing 2	15	34502554	34608461	-	ENSMUSG00000038879	0.960625	1.75252	0.339346	0.201268	0.209863	0.00727541	0.0151698	0.920767	7.14956	7.02483	6.97394	6.85528	6.79079	6.66279	8.77855	8.90388	8.89281	8.83985	8.69062	8.62565	7.14407	7.11726	7.20782	7.03998	6.86714	7.11412	8.70621	9.11983	8.94254	8.82241	8.87256	8.9939
Kcns2	K+ voltage-gated channel, subfamily S, 2	15	34767136	34772092	+	ENSMUSG00000050963	0.56111	0.136545	0.462987	0.715826	0.0585975	0.00743441	-0.0439616		10.0149	10.1323	10.0067	10.0347	9.84608	9.66279	10.4201	10.3276	10.2414	10.3373	10.1212	10.2363	9.51409	9.56306	9.75109	10.0535	9.71042	9.82877	10.4035	10.3919	10.4241	10.3006	10.4154	10.3497
Stk3	serine/threonine kinase 3	15	34805251	35085561	-	ENSMUSG00000022329	1.05654	5.55834	0.316915	0.0292676	0.729771	-0.00645207	-0.0220589	0.139122	8.29225	8.25147	8.30904	8.45165	8.19679	8.29147	8.11197	7.96578	8.1178	8.08867	7.97508	8.07483	7.99613	8.10058	8.20782	8.13018	8.26511	8.29511	7.84371	8.12935	8.06637	7.96337	7.92215	7.96212
Vps13b	vacuolar protein sorting 13B (yeast)	15	35301301	35860983	+	ENSMUSG00000037646	3.92408	7.64448	0.062262	0.0123308	0.0738404	-0.0218149	-0.00652476	0.0817218	10.7636	10.8383	10.9272	10.8045	10.9497	10.8605	10.8342	10.8018	10.9511	10.6479	10.8257	10.8088	10.7833	10.7754	10.7582	10.8317	10.7253	10.8954	10.2874	10.8063	10.7825	10.8134	10.8595	10.8468
Cox6c	cytochrome c oxidase, subunit VIc	15	35855641	35868001	-	ENSMUSG00000014313	1.17822	0.104434	0.291299	0.750102	0.54445	-0.00980353	-0.00322419		11.7577	11.6149	11.6355	11.7118	11.6179	11.6028	11.6316	11.8154	11.6984	11.9198	11.5355	11.6466	11.6796	11.5243	11.6913	11.7452	11.7147	11.6625	11.5203	11.6161	11.6644	11.6192	11.5613	11.5673
Rgs22	regulator of G-protein signalling 22	15	35939234	36070155	-	ENSMUSG00000037627	0.189081	0.0315273	0.668581	0.860948	0.421756	-0.0609124	0.394071		1.49135	3.42492	1.79072	2.78489	2.46887	3.81034	6.11197	5.70044	5.34728	6.15838	6.04908	5.91437	2.58335	3.25928	3.50738	3.82275	2.77968	2.45591	5.03636	5.50592	5.57217	5.86821	6.10501	5.30391
Polr2k	polymerase (RNA) II (DNA directed) polypeptide K	15	36103772	36106767	+	ENSMUSG00000045996	0.931136	0.930807	0.34669	0.346773	0.755014	-0.0460962	-0.048906		7.37399	7.43615	7.44416	7.62284	7.15537	7.4086	7.54408	7.39232	7.5266	7.78801	7.10566	7.29723	7.26142	6.69668	7.20782	7.38347	6.83279	6.93164	7.00319	7.15444	7.26991	7.09528	7.21519	7.11126
Spag1	sperm associated antigen 1	15	36109285	36164932	+	ENSMUSG00000037617	0.107125	0.759903	0.74702	0.394241	0.213633	-0.0227999	-0.0125464		7.67126	7.87613	7.81308	7.74837	7.64877	7.65165	7.25363	7.62936	7.61737	7.5802	7.7181	7.48035	7.81601	7.62851	7.62286	7.93545	7.86714	7.75969	7.00319	7.3945	7.58966	7.40878	7.79307	7.3483
Rnf19a	ring finger protein 19A	15	36169689	36212902	-	ENSMUSG00000022280	0.0229541	0.453209	0.881173	0.508921	0.306412	-0.0115537	0.0244208		9.8245	9.66571	9.92	9.94275	9.99439	9.65444	9.5714	9.37504	9.5727	9.42763	9.50851	9.3866	10.0411	10.1006	9.98672	10.0573	9.99108	10.1872	9.16564	9.50103	9.52296	9.53549	9.66883	9.57303
Ankrd46	ankyrin repeat domain 46	15	36407423	36426546	-	ENSMUSG00000048307	0.131225	0.996393	0.721163	0.330729	0.268872	-0.00904917	-0.00272916		12.0483	12.0849	12.1242	12.1586	12.0665	12.0198	11.9782	11.9244	11.9059	11.9841	11.844	11.8885	12.0452	11.9855	12.1278	12.1424	12.0276	12.1056	11.6356	11.8824	11.9666	11.8865	11.8988	11.9047
Pabpc1	poly(A) binding protein, cytoplasmic 1	15	36525416	36538728	-	ENSMUSG00000022283	0.216273	6.16929	0.64718	0.0224946	0.0865186	-0.0123908	-0.0126775	0.118865	11.5574	11.567	11.6093	11.5721	11.5609	11.5405	11.3146	11.3691	11.3252	11.4528	11.3367	11.3833	11.4451	11.4057	11.4426	11.5608	11.605	11.4873	11.1064	11.2079	11.2733	11.2464	11.2995	11.2369
Ywhaz	tyrosine 3-monooxygenase/tryptophan 5-monooxygenase activation protein, zeta polypeptide	15	36700525	36724302	-	ENSMUSG00000022285	0.368584	2.5143	0.550964	0.129321	0.0311356	-0.00928917	-0.00694982	0.341499	14.2465	14.3231	14.3715	14.3516	14.245	14.2573	14.4893	14.4691	14.5173	14.4368	14.3348	14.3733	14.2291	14.2031	14.2105	14.3516	14.2573	14.3071	14.2618	14.3789	14.4312	14.3317	14.3489	14.3456
Zfp706	zinc finger protein 706	15	36926786	36937157	-	ENSMUSG00000062397	0.478623	0.18455	0.497415	0.672324	0.259717	-0.00977035	-0.00396113		12.13	12.1467	12.1578	12.1559	12.0609	12.1071	12.7309	12.6653	12.715	12.8283	12.5919	12.6458	12.093	12.084	12.1131	12.2204	12.1053	12.0975	12.4915	12.6294	12.618	12.5929	12.6035	12.6159
Ncald	neurocalcin delta	15	37295930	37722325	-	ENSMUSG00000051359	4.13412	24.6921	0.0562369	8.52e-05	0.166277	-0.0202555	-0.0197794	0.00263617	13.5922	13.7355	13.8197	13.6233	13.5628	13.5693	13.0936	13.1155	12.9809	13.0907	12.9732	13.0463	13.3497	13.4018	13.582	13.3817	13.4001	13.4492	12.727	12.8758	12.7935	12.7428	12.8947	12.9223
Rrm2b	ribonucleotide reductase M2 B (TP53 inducible)	15	37853707	37891073	-	ENSMUSG00000022292	0.22264	2.57673	0.642409	0.124938	0.133216	-0.0294998	-0.0279818	0.335228	9.97919	10.0759	10.0931	10.1212	9.89093	9.94461	10.0113	9.96002	10.0197	10.0993	9.91111	9.80998	9.7229	9.66867	9.91304	10.132	9.77743	9.8653	9.51371	9.87021	9.72242	9.73296	9.73138	9.74488
Ubr5	ubiquitin protein ligase E3 component n-recognin 5	15	37897083	38008608	-	ENSMUSG00000037487	1.37411	0.180725	0.255596	0.675526	0.0127984	-0.00305233	0.00663358		11.6232	11.697	11.7396	11.7044	11.7606	11.6105	12.2514	12.2366	12.2118	11.897	12.1267	12.0685	11.7341	11.8055	11.7527	11.8617	11.7374	11.903	12.0985	12.2313	12.258	12.2691	12.2551	12.288
Klf10	Kruppel-like factor 10	15	38224168	38230462	-	ENSMUSG00000037465	0.451608	1.48222	0.509662	0.238333	0.659278	-0.00397898	0.027155	0.95045	10.3067	9.97951	10.2001	10.0479	10.4504	9.73582	6.62654	6.71425	6.40956	6.77031	6.47131	6.58179	10.5153	10.3608	10.4381	10.3369	10.4718	10.4203	6.76675	6.58187	6.32315	6.02349	6.58716	6.45365
Azin1	antizyme inhibitor 1	15	38417185	38449021	-	ENSMUSG00000037458	0.208708	5.32437	0.652961	0.0324524	0.170557	-0.0121854	-0.0188902	0.148276	12.0922	12.2001	12.2488	12.2133	12.1257	12.063	12.0827	11.9851	12.1363	12.0192	11.8936	11.9741	12.0046	11.9528	11.8935	12.0535	11.8877	12.1029	11.8773	11.9208	11.9649	11.9151	11.7966	11.9414
Atp6v1c1	ATPase, H+ transporting, lysosomal V1 subunit C1	15	38591659	38622198	+	ENSMUSG00000022295	0.00369785	0.977129	0.952146	0.335331	0.326917	-0.0143899	-0.00444843		12.6235	12.6949	12.7029	12.7475	12.6001	12.6344	12.4345	12.3537	12.4213	12.5019	12.2057	12.3144	12.6275	12.5958	12.6289	12.741	12.5931	12.6678	12.0491	12.3066	12.3182	12.2582	12.2122	12.2704
Baalc	brain and acute leukemia, cytoplasmic	15	38765455	38782810	+	ENSMUSG00000022296	0.0089497	0.983135	0.925621	0.333886	0.128204	0.00784256	-0.00352148		12.9615	12.8694	12.8606	12.9561	12.9352	12.983	12.1588	12.1497	12.1421	12.0424	11.8283	12.0245	12.8793	12.8449	12.8311	12.8802	12.9894	12.8661	12.1349	12.2834	12.3182	12.4014	12.3176	12.3787
Fzd6	frizzled homolog 6 (Drosophila)	15	38837879	38869732	+	ENSMUSG00000022297	0.0102381	0.473717	0.920465	0.4996	0.00659844	-0.0404836	-0.0481495		8.17083	8.19311	8.07612	8.09232	8.00025	7.84009	9.06543	9.40301	9.2111	9.10994	8.64839	8.808	7.70437	7.6516	7.90731	8.06306	7.94961	8.13539	8.63221	8.85105	9.07571	9.14349	8.82122	8.70051
Cthrc1	collagen triple helix repeat containing 1	15	38908478	38918667	+	ENSMUSG00000054196	0.00621834	133.317	0.937971	4.95e-10	0.785181	-0.200973	-0.293635	1.88381e-07	7.2987	7.35566	7.46314	7.21785	7.3996	7.29863	8.8592	9.02514	8.98773	8.96573	8.48737	8.74179	5.16831	5.25928	5.19544	5.50082	5.10161	5.2108	7.03636	7.15444	7.28071	7.24167	6.58716	6.84307
Slc25a32	solute carrier family 25, member 32	15	38925737	38944262	-	ENSMUSG00000022299	1.07366	6.81536	0.313129	0.0171908	0.248723	0.0110026	0.024571	0.100293	8.01491	7.74685	8.08227	8.04793	8.09822	7.86924	7.7346	7.64386	8.0346	7.77918	7.50325	7.67657	8.28933	8.0752	8.06538	8.24902	8.23911	8.12834	7.9778	7.82003	7.87283	8.17033	7.84198	7.99041
Dcaf13	DDB1 and CUL4 associated factor 13	15	38944420	38978402	+	ENSMUSG00000022300	0.00442473	2.1918	0.94766	0.155139	0.768388	-0.00642645	0.0235777	0.880049	8.25953	8.30144	8.38566	8.44596	8.27622	8.36152	8.49663	8.40939	8.35257	8.37297	8.21258	8.12459	8.58335	8.4491	8.50237	8.37119	8.38849	8.56965	8.37134	8.33538	8.38955	8.32167	8.3469	8.35919
Rims2	regulating synaptic membrane exocytosis 2	15	39029878	39513486	+	ENSMUSG00000037386	0.00507037	3.62746	0.943978	0.0720864	0.123112	0.00639382	0.017194	0.242238	11.1107	11.134	11.224	11.3318	11.2641	11.1912	11.4293	11.4331	11.4253	11.2151	11.3572	11.2643	11.3699	11.3608	11.3133	11.6782	11.5028	11.4325	11.2652	11.5749	11.6669	11.563	11.566	11.5465
Gm16291	predicted gene 16291	15	39628591	39643923	+	ENSMUSG00000087695	0.108344	0.697394	0.745638	0.414039	0.375204	0.423432	0.212702		3.66127	2.00988	3.20575	3.63289	3.63879	3.64042	2.45662	1.58496	2.84478	2.75238	1.40522	1.24194	3.26142	3.99624	3.50738	2.50082	3.77968	3.26326	3.38428	2.88143	3.53655	2.40878	2.93509	3.30391
Lrp12	low density lipoprotein-related protein 12	15	39702149	39775540	-	ENSMUSG00000022305	0.26052	1.929	0.615642	0.180934	0.136261	0.000486554	0.0137066	0.903826	10.7906	10.7525	10.8223	10.8628	10.6941	10.7516	10.2755	10.2396	10.2442	10.2118	10.1668	10.1874	10.852	11.0308	10.9262	11.0175	11.0171	11.066	10.228	10.2536	10.2928	10.177	10.3176	10.2997
Zfpm2	zinc finger protein, multitype 2	15	40486588	40936138	+	ENSMUSG00000022306	0.0008854	0.565498	0.976572	0.461268	0.898993	0.00828449	0.0238937		7.72975	8.33181	8.21138	8.07768	8.19679	8.01546	8.13469	8.13955	7.75966	7.84831	8.24442	8.16676	8.27265	8.15005	8.43022	8.56152	8.00465	8.33855	8.07677	8.16683	7.98941	8.21614	8.20988	8.11769
Oxr1	oxidation resistance 1	15	41279028	41692594	+	ENSMUSG00000022307	0.0758329	1.58551	0.785999	0.223219	0.0457099	-0.00986119	-0.0115925	0.938925	13.1644	13.1987	13.2906	13.2582	13.1684	13.2303	13.2041	13.086	13.2202	13.1616	12.9185	13.0398	13.068	13.0368	13.0892	13.2431	13.0991	13.2336	12.9676	13.1156	13.0374	13.0872	12.9734	13.1253
Angpt1	angiopoietin 1	15	42256269	42508341	-	ENSMUSG00000022309	0.276182	1.04008	0.605295	0.320614	0.98822	-0.0106471	0.0322061		6.49135	5.91389	6.2172	6.19089	5.89513	5.44777	7.46399	7.3394	7.6517	7.76861	7.54252	7.47671	6.34506	6.39869	6.47844	5.98044	6.03579	6.5192	7.70621	7.16621	7.3436	7.55507	7.16049	7.45152
D5Mit5	marker	15	43279930	43280030	marker	marker	marker	marker	marker	marker	marker	marker	marker	marker
Rspo2	R-spondin 2 homolog (Xenopus laevis)	15	42852357	43002364	-	ENSMUSG00000051920	1.60129	0.492771	0.221019	0.491204	0.0855971	1.50361	-0.00131081		7.7008	7.77365	8.10662	7.61271	7.76349	7.47331	1.13469	1	0.259814	3.75238	3.40522	3.41187	7.52821	7.90313	8.11882	7.72964	7.6075	7.54337	2.89885	1.29646	1.79959	2.73071	2.71269	2.30391
Eif3e	eukaryotic translation initiation factor 3, subunit E	15	43081586	43114282	-	ENSMUSG00000022336	0.40506	0.913874	0.532081	0.351095	0.336182	-0.0255093	-0.00798145		10.5206	10.4583	10.5209	10.5987	10.4274	10.4875	10.4108	10.3554	10.4108	10.6984	10.2334	10.3622	10.3868	10.4039	10.4577	10.6172	10.4957	10.6271	10.0011	10.1576	10.2231	10.177	10.2493	10.1881
Emc2	ER membrane protein complex subunit 2	15	43308775	43359323	+	ENSMUSG00000022337	2.87543	0.478474	0.106266	0.497481	0.842172	-0.00497189	-0.00952776		10.0517	10.0973	10.1614	10.1892	10.1413	10.1101	10.3034	10.1812	10.3083	10.4979	10.0599	10.1276	10.0736	9.92934	10.0187	10.2082	10.0143	10.1301	10.2617	10.1776	10.2005	10.2448	10.0702	10.1161
Tmem74	transmembrane protein 74	15	43698241	43701575	-	ENSMUSG00000054409	4.91e-07	0.853897	0.999448	0.36704	0.779692	-0.0838072	-0.00324313		6.59987	6.83431	7.05124	7.12118	6.8439	6.92582	5.80711	5.67243	6.04117	5.1309	6.28786	5.5995	6.80058	6.6516	6.96682	7.08578	5.91719	6.43319	5.57693	5.50592	4.96951	5.36298	5.74244	5.3483
Trhr	thyrotropin releasing hormone receptor	15	44027681	44067458	+	ENSMUSG00000038760	0.652082	11.0051	0.429363	0.00362066	0.61538	0.288493	0.061541	0.0376568	4.66127	4.59485	3.90619	4.27032	4.27622	3.64042	4.94204	4.58496	4.65213	4.95402	5.16011	4.94238	4.50935	4.48167	4.98132	4.50082	4.70568	4.62583	6.35828	5.96889	5.94254	6.16367	6.61958	6.53273
Nudcd1	NudC domain containing 1	15	44206773	44259853	-	ENSMUSG00000038736	0.0762516	4.47199	0.785424	0.0478966	0.929763	-0.0420732	-0.0255257	0.189097	8.18484	8.41361	8.46408	8.47419	8.32061	8.22538	8.76488	8.64746	8.6305	8.94327	8.55497	8.48626	8.19806	8.16617	8.05856	8.13018	7.96555	8.2888	8.16189	8.39975	8.3855	8.3036	8.20988	8.43319
Eny2	enhancer of yellow 2 homolog (Drosophila)	15	44259657	44269231	+	ENSMUSG00000022338	0.08649	0.883952	0.771876	0.358922	0.00294269	-0.0076073	-0.00913258		9.79513	9.99857	9.93163	9.85957	9.70009	9.71188	10.0109	9.87191	9.81632	9.86243	9.62197	9.65295	9.73107	9.84424	9.87856	10.0801	9.88821	9.99313	9.76428	9.74973	9.95914	9.87026	9.92052	9.79375
Ebag9	estrogen receptor-binding fragment-associated gene 9	15	44451187	44472570	+	ENSMUSG00000022339	0.440121	1.48398	0.515034	0.238065	0.0532917	-0.0443569	-0.0245015	0.950153	8.79513	8.73781	8.768	8.72035	8.56162	8.73318	8.59002	8.65464	8.5952	8.72508	8.50851	8.51341	8.67928	8.41578	8.56146	8.84512	8.56628	8.57485	7.99478	8.25066	8.44824	8.48024	8.41313	8.37537
Sybu	syntabulin (syntaxin-interacting)	15	44503405	44619609	-	ENSMUSG00000022340	10.6223	16.6428	0.00412756	0.00063889	0.98438	-0.0145202	0.00234895	0.0115286	10.7802	10.8129	10.9027	10.838	10.8363	10.9142	10.5735	10.6239	10.5806	10.5559	10.4551	10.6039	10.7682	10.8666	10.9374	10.757	10.7092	10.8407	10.3048	10.5059	10.5058	10.4284	10.5561	10.5207
2310069G16Rik	RIKEN cDNA 2310069G16 gene	15	44619328	44637373	+	ENSMUSG00000085947	1.09546	0.0788029	0.308397	0.78196	0.0496289	0.000524373	0.0102929		6.07631	5.17981	5.63202	5.32095	5.86118	5.72788	5.83513	5.61471	5.68608	5.92231	6.10566	6.07483	5.75328	5.76178	5.54691	5.67075	4.91719	5.04087	5.82485	5.58187	5.73818	5.99374	5.29766	5.51336
A930017M01Rik	RIKEN cDNA A930017M01 gene	15	44712974	44715850	+	ENSMUSG00000090446	0.866056	2.46591	0.363724	0.132845	0.241672	-0.000406144	0.0297729	0.345884	5.91761	5.71032	5.93367	6.04793	5.63879	6.09985	6.50973	6.2854	5.98773	6.21182	6.51374	5.94238	5.90528	6.19788	5.98132	6.54522	6.18567	6.15635	6.06878	6.36255	6.34391	6.26676	6.46758	6.55183
Kcnv1	potassium channel, subfamily V, member 1	15	44937830	44946480	-	ENSMUSG00000022342	1.87442	0.00168397	0.186938	0.967695	0.907132	-0.0995132	-0.0355681		11.6657	11.948	11.8622	11.9111	11.6923	11.9223	3.83513	4.24793	3.84478	5.95402	5.92878	4.82691	11.3555	11.4897	11.3688	11.5595	11.4457	11.4678	5.10049	2.61839	3.02198	4.10922	6.60346	5.05879
Csmd3	CUB and Sushi multiple domains 3	15	47412183	48623609	-	ENSMUSG00000022311	0.283049	0.0302311	0.600876	0.863806	0.467696	-0.0308702	0.0288912		8.83565	9.28911	9.1036	9.31159	9.01961	8.81534	9.64248	9.42836	9.72946	9.16855	9.65315	9.56612	9.35682	9.37822	9.27997	9.29199	8.94559	9.38369	9.10831	9.43602	9.36691	9.52513	9.65129	9.42803
Gm16300	predicted gene 16300	15	47531260	47535373	-	ENSMUSG00000089828	9.91087	6.13008	0.00529434	0.0228717	0.19217	-0.187821	-0.130847	0.119775	3.40783	2.74973	2.2519	2.8852	2.82219	2.23497	2.23567	2.9782	1.84958	1.99605	3.00216	1.81241	2.27578	2.68867	2.34465	2.97071	2.47923	2.43411	3.42892	2.07887	0.228978	3.24874	2.55534	2.34655
Trps1	trichorhinophalangeal syndrome I (human)	15	50486307	50721587	-	ENSMUSG00000038679	0.0381527	0.795321	0.84721	0.383651	0.150005	0.00413017	-0.00888731		9.58146	9.37037	9.57862	9.50462	9.46887	9.54128	10.099	9.93517	10.0752	9.78581	9.7846	9.86033	9.52587	9.49768	9.25334	9.52873	9.39144	9.48933	10.0011	10.1278	10.1049	10.1519	10.0271	10.0571
Eif3h	eukaryotic translation initiation factor 3, subunit H	15	51618109	51697007	-	ENSMUSG00000022312	0.0103892	0.513708	0.919882	0.482256	0.585899	-0.012866	0.00454416		11.0402	11.1026	11.0473	11.0786	11.0416	11.0823	11.1906	11.3259	11.2045	11.3722	11.1425	11.2434	11.0246	11.1224	11.1939	11.1229	11.0789	10.9951	11.0199	11.1443	11.123	11.1967	11.2428	11.2603
Utp23	UTP23, small subunit (SSU) processome component, homolog (yeast)	15	51708975	51716160	+	ENSMUSG00000022313	0.185156	4.55842	0.671821	0.0459972	0.207548	-0.0344356	-0.00816186	0.183989	7.79513	7.66333	7.6487	7.63429	7.74462	7.86924	7.54408	7.3837	7.48863	7.48574	7.58513	7.68489	7.64513	7.60505	7.66838	7.83174	7.78166	7.69431	6.96924	7.2907	7.38455	7.42001	7.57067	7.46378
Rad21	RAD21 homolog (S. pombe)	15	51794151	51823306	-	ENSMUSG00000022314	1.16956	1.16619	0.293028	0.293703	0.505423	0.000405363	0.00126319	0.985183	11.6386	11.6011	11.7096	11.7656	11.6046	11.7371	12.1234	12.0637	12.0436	12.1244	12.0373	12.0685	11.6777	11.6212	11.6945	11.8092	11.7455	11.7812	12.0204	12.1278	12.0973	12.1414	12.0794	12.0293
Aard	alanine and arginine rich domain containing protein	15	51871653	51877267	+	ENSMUSG00000068522	0.583574	0.0912505	0.454297	0.765875	0.897623	-0.107532	0.0340844		5.2987	5.00988	5.06373	5.41716	5.27622	5.28427	5.45662	5.32193	5.8144	5.78801	5.5345	5.5995	5.47088	5.13375	5.29166	5.71028	4.70568	5.3628	4.48382	5.46639	4.85848	5.65671	4.98571	5.43319
Med30	mediator complex subunit 30	15	52544000	52561986	+	ENSMUSG00000038622	0.0354405	12.4028	0.852672	0.00227991	0.979354	-0.0578195	-0.0521794	0.027511	7.72017	7.79124	7.94722	7.63289	7.76349	7.79017	7.93559	8.01681	7.88187	8.30697	7.95981	8.06212	7.18029	7.55696	7.49733	7.48951	7.45775	7.32627	7.38428	7.54439	7.52751	7.7397	7.57067	7.3483
Ext1	exostoses (multiple) 1	15	52895593	53177714	-	ENSMUSG00000061731	0.0397085	1.62672	0.844169	0.217532	0.851522	0.00806147	-0.0293105	0.932625	10.374	10.303	10.4054	10.3788	10.3892	10.2459	8.52701	8.58871	8.52191	8.49115	8.69062	8.59067	10.0146	9.95972	10.197	10.0361	9.9007	10.1177	8.74685	8.52528	8.57217	8.54833	8.76798	8.58003
Samd12	sterile alpha motif domain containing 12	15	53293176	53734092	-	ENSMUSG00000058656	1.94338	6.25644	0.179392	0.0216815	0.294017	-0.105537	-0.0366494	0.11567	7.13521	6.96408	7.3453	7.09232	6.86118	7.25513	6.7494	6.52356	6.73555	6.04517	7.01993	6.74974	6.98934	6.82406	6.84525	7.00862	6.68657	6.9637	4.96924	6.56325	6.36437	6.40878	6.52005	6.39137
Tnfrsf11b	tumor necrosis factor receptor superfamily, member 11b (osteoprotegerin)	15	54082174	54110039	-	ENSMUSG00000063727	3.03314	1.9765	0.0977471	0.175902	0.842168	0.122095	-0.0565845	0.900204	6.55744	6.20628	6.25015	6.10682	5.9283	6.31284	4.30461	3.90689	3.96025	4.60038	4.49268	4.94238	6.01631	5.88377	6.0379	6.28218	6.01234	5.91534	4.82485	4.61839	4.21462	4.99374	4.82817	4.47383
Mal2	mal, T cell differentiation protein 2	15	54402921	54434401	+	ENSMUSG00000024479	0.925823	1.11525	0.348037	0.304188	0.338627	0.00858855	-0.00992783	0.992817	12.4665	12.52	12.5805	12.7233	12.5191	12.5645	11.0816	11.014	11.2198	11.2546	10.7781	10.945	12.4401	12.4116	12.3424	12.7185	12.5174	12.6142	11.1591	11.2773	11.1652	11.2064	11.1064	11.1827
Nov	nephroblastoma overexpressed gene	15	54577257	54585594	+	ENSMUSG00000037362	2.23579	5.25284	0.151273	0.0335033	0.950891	-0.126568	-0.000550674	0.151563	10.5289	10.4221	10.6764	10.3022	10.3637	10.3581	4.65825	4.64386	5.46927	4.88989	4.86465	7.23063	10.3003	10.4704	10.8393	10.2871	10.3064	10.426	3.89885	4.61839	4.38455	5.49625	4.21519	5.2108
Enpp2	ectonucleotide pyrophosphatase/phosphodiesterase 2	15	54670456	54751573	-	ENSMUSG00000022425	0.00381386	2.27165	0.951402	0.148207	0.406423	-0.0104158	-0.00942964	0.366059	12.5864	12.612	12.5691	12.5715	12.6454	12.5158	13.164	13.1023	13.0397	13.4092	13.2373	13.3287	12.5111	12.4953	12.4049	12.5709	12.4825	12.5061	12.6554	12.7958	13.4454	12.9982	12.8488	12.8243
Taf2	TAF2 RNA polymerase II, TATA box binding protein (TBP)-associated factor	15	54846684	54903707	-	ENSMUSG00000037343	3.53033	0.600985	0.0756858	0.447744	0.661625	0.00145262	0.00421418		9.69836	9.87613	9.7699	9.74141	9.71679	9.72788	9.63852	9.76321	9.75167	9.6902	9.70214	9.72978	9.86134	9.78545	9.82128	9.71757	9.68176	9.83745	9.61035	9.82003	9.76537	9.80325	9.78773	9.78369
Deptor	DEP domain containing MTOR-interacting protein	15	54943872	55090826	+	ENSMUSG00000022419	1.06092	0.209101	0.31594	0.652658	0.951639	0.0167715	-0.00729878		9.57871	9.9167	9.90952	9.99814	9.81072	9.95319	10.6444	10.6474	10.8789	10.3933	10.6036	10.6417	9.8706	9.65137	9.66833	9.73197	9.6623	9.74355	10.8658	10.9943	10.8503	10.8936	10.708	10.936
Col14a1	collagen, type XIV, alpha 1	15	55139305	55352358	+	ENSMUSG00000022371	1.04102	0.0130074	0.320401	0.910395	0.366627	-0.028342	0.0737949		4.66127	4.94848	5.59807	4.71089	5.11272	4.64042	4.52701	4.70044	4.58174	4.82277	4.21258	4.14883	5.54683	5.19788	5.58539	5.14468	5.36464	5.26326	3.74685	4.9969	4.67405	4.8011	4.71269	4.62583
Mrpl13	mitochondrial ribosomal protein L13	15	55365649	55389303	-	ENSMUSG00000022370	0.301343	0.0587044	0.589436	0.811152	0.730266	0.00108483	0.00113292		9.02285	8.87638	8.88833	8.9081	8.90878	8.88516	9.17084	9.31064	9.251	9.58904	9.25466	9.26428	8.90521	8.87379	9.0389	9.00536	8.96174	9.01704	9.13561	9.31911	9.30783	9.26499	9.23042	9.22202
Mtbp	Mdm2, transformed 3T3 cell double minute p53 binding protein	15	55388963	55457978	+	ENSMUSG00000022369	1.70155	0.866764	0.207666	0.363532	0.813373	-0.0282225	0.0339647		4.95078	5.06878	5.20575	4.9224	5.51326	4.64042	5.96758	6.24888	5.99208	6.38721	6.40522	6.19614	5.16976	5.53478	5.0379	5.31024	5.45775	4.26326	6.03636	5.68878	5.96951	6.21923	6.25701	6.18924
Sntb1	syntrophin, basic 1	15	55470398	55738504	-	ENSMUSG00000060429	4.68927	8.35225	0.0432834	0.009382	0.979607	-0.0279482	-0.116368	0.0685397	5.2987	5.33181	5.56331	4.46297	4.9283	5.03274	8.80711	8.87958	9.0147	8.44726	8.86874	9.01673	5.06878	3.99624	5.24435	4.74875	3.77968	4.3628	8.3971	8.83562	8.72242	8.36298	8.26216	8.65263
Has2	hyaluronan synthase 2	15	56497182	56526094	-	ENSMUSG00000022367	0.00700825	0.0328584	0.934159	0.858076	0.329009	-0.221514	-0.0668264		2.81328	3.42492	2.52768	3.27032	2.79079	0.640418	3.30461	2.58496	3.71925	3.60038	2.99018	2.82691	1.84639	2.99624	3.33746	3.50082	2.45775	2.45591	0.576925	2.88143	4.02198	3.21614	3.29766	2.88887
Derl1	Der1-like domain family, member 1	15	57701057	57723973	-	ENSMUSG00000022365	1.15539	8.94977	0.295884	0.0074996	0.835937	-0.0087821	-0.00405357	0.0594558	10.3321	10.3689	10.4667	10.4113	10.4172	10.43	10.8804	10.7855	10.8597	10.9579	10.7781	10.9493	10.3529	10.2742	10.4143	10.3604	10.3721	10.3733	10.6631	10.7773	10.7996	10.7925	10.7824	10.7948
Wdr67	WD repeat domain 67	15	57743754	57801622	+	ENSMUSG00000022364	0.010208	0.628151	0.920582	0.437819	0.684221	0.0213953	0.0479053		7.09126	7.11142	7.32469	7.33333	7.27622	7.13227	6.91605	6.75489	6.65213	6.98504	7.04908	7.19614	7.43135	7.6401	7.48721	7.33371	7.58704	7.65558	6.72667	7.34086	6.69036	7.05264	7.21519	7.22277
9130401M01Rik	RIKEN cDNA 9130401M01 gene	15	57860509	57907980	-	ENSMUSG00000022362	0.768828	3.39926	0.391532	0.0808798	0.460116	-0.0195114	0.00921668	0.260151	8.79189	8.72046	8.92405	8.86004	8.86324	8.99401	8.41147	8.41827	8.56902	8.66451	8.52525	8.4957	8.9962	8.84654	8.83731	8.77257	8.96182	8.91984	8.07677	8.36862	8.4578	8.28573	8.50433	8.25338
Zhx1	zinc fingers and homeoboxes 1	15	57878572	57908096	-	ENSMUSG00000022361	6.47e-06	10.2839	0.997997	0.00464233	0.137827	-0.0211207	-0.0227675	0.0446652	10.9556	10.9285	10.9894	11.0403	10.8873	10.8965	10.9135	10.8391	10.9321	10.9529	10.9118	10.8638	10.731	10.6751	10.719	10.866	10.6901	10.8652	10.4838	10.7832	10.7274	10.6987	10.7972	10.7734
Atad2	ATPase family, AAA domain containing 2	15	57925602	57966637	-	ENSMUSG00000022360	0.595223	7.74e-05	0.449896	0.993074	0.48287	-0.0114471	-0.0206487		8.6309	8.70745	8.66519	8.9387	8.49123	8.42832	6.65825	6.59991	6.7851	6.65927	6.95981	6.79638	8.28933	8.67994	8.49733	8.95203	8.65256	8.618	6.72667	6.7414	6.34576	6.34377	6.93509	6.69622
Wdyhv1	WDYHV motif containing 1	15	57972991	57990209	+	ENSMUSG00000022359	0.429111	3.06145	0.520278	0.0963042	0.944927	-0.0231523	-0.00182947	0.287537	8.6411	8.36156	8.47254	8.53443	8.55101	8.51694	8.50973	8.46352	8.29324	8.60038	8.44414	8.63855	8.45618	8.41578	8.55663	8.3146	8.44644	8.63582	7.80574	8.46639	8.40938	8.37457	8.46312	8.3646
Fbxo32	F-box protein 32	15	58011634	58046433	-	ENSMUSG00000022358	0.754675	2.56592	0.395841	0.125685	0.566607	0.031627	0.00944114	0.336636	8.86191	8.78247	8.88516	9.04039	8.83072	8.67934	8.48779	8.63652	8.3418	8.54924	8.64362	8.76146	8.7491	8.75102	9.27989	9.04382	8.83687	8.89873	8.87155	8.65402	8.74597	9.01589	8.73117	8.55652
Klhl38	kelch-like 38 (Drosophila)	15	58146128	58155724	-	ENSMUSG00000022357	1.71392	1.30661	0.20609	0.267208	0.738888	-0.0255869	0.0692909	0.968249	4.74836	4.38284	5.586	5.53207	4.24392	4.90195	4.92859	4.7761	4.43454	4.55644	5.21258	4.95948	4.99803	5.25988	5.47906	5.36625	4.92764	4.60972	3.16189	5.35218	5.26338	3.9411	5.1403	5.11384
D15Ertd621e	DNA segment, Chr 15, ERATO Doi 621, expressed	15	58247023	58289356	+	ENSMUSG00000037119	0.00583572	0.0583435	0.939906	0.811721	0.311765	-0.00631533	0.0022477		11.0257	10.8905	11.0661	11.0489	11.0071	11.0002	11.0431	11.0478	11.0371	10.9946	11.0785	10.9767	11.0575	11.0385	10.9604	11.0707	10.9315	11.1354	10.8977	11.0201	11.0009	11.0372	11.0241	11.0861
Gm20712	predicted gene 20712	15	58612016	58613506	-	ENSMUSG00000093677	0.0102683	0.298476	0.920348	0.591198	0.327263	0.00949099	-0.0210794		6.53574	6.78247	6.94722	6.55043	6.35151	6.4984	6.52701	6.06609	6.42974	6.36119	5.99018	6.30803	6.50935	6.6516	6.67731	6.71028	6.70568	6.58519	6.74685	6.15444	6.30209	6.24167	6.29766	6.16189
Tmem65	transmembrane protein 65	15	58613824	58655085	-	ENSMUSG00000062373	0.0296426	0.00584815	0.865124	0.939842	0.0365718	0.00044541	-0.0176036		11.7991	11.7951	11.8523	11.7414	11.5826	11.5924	11.624	11.5187	11.5974	11.5954	11.294	11.4416	11.5985	11.6058	11.6182	11.7926	11.6308	11.7896	11.4488	11.6617	11.6451	11.5387	11.4525	11.4956
Trmt12	tRNA methyltranferase 12 homolog (S. cerevisiae)	15	58704204	58708336	+	ENSMUSG00000037085	1.36657	0.255191	0.256861	0.619253	0.543012	-0.00236103	0.0118586		7.77675	7.97951	8.05124	8.10682	7.8439	7.85959	7.82119	7.86419	7.71925	7.86508	7.73614	7.7811	7.89078	8.18211	8.01694	8.00067	8.05021	8.12125	7.56561	7.90379	7.87996	7.7397	7.90252	7.95496
Rnf139	ring finger protein 139	15	58720784	58733945	+	ENSMUSG00000037075	0.595052	0.00541108	0.44996	0.942129	0.815078	-0.0113444	0.00211464		9.47434	9.55678	9.53443	9.63289	9.60842	9.4574	9.61447	9.51175	9.62395	9.78139	9.55751	9.43916	9.53987	9.51981	9.56628	9.52041	9.52384	9.67266	9.39391	9.53008	9.50003	9.44496	9.58306	9.35376
Tatdn1	TatD DNase domain containing 1	15	58721708	58765285	-	ENSMUSG00000050891	0.0482332	0.688315	0.828509	0.41704	0.192218	-0.0357885	-0.046969		6.59987	6.2829	7.05124	6.48533	6.42306	6.4984	6.7346	6.2854	6.79897	6.95402	6.59504	6.35047	6.34889	6.28903	6.35983	6.89314	6.26511	6.58519	5.74685	6.7559	6.60694	6.67557	6.46758	6.67895
Ndufb9	NADH dehydrogenase (ubiquinone) 1 beta subcomplex, 9	15	58765365	58771044	+	ENSMUSG00000022354	0.544568	0.561606	0.469563	0.462792	0.126964	-0.00934891	-0.00166545		11.5534	11.3849	11.344	11.4121	11.2866	11.3146	11.5578	11.6216	11.5066	11.689	11.3455	11.4665	11.4457	11.3064	11.4732	11.4795	11.5558	11.446	11.3243	11.4532	11.5842	11.4909	11.472	11.472
Mtss1	metastasis suppressor 1	15	58772799	58913581	-	ENSMUSG00000022353	0.0220174	0.394656	0.883604	0.537341	0.148544	-0.00846345	0.0026658		9.37093	9.24191	9.14827	9.13185	9.2137	8.9533	10.9396	10.9766	11.0046	10.9072	10.9209	10.996	9.12561	9.36082	9.34869	9.26237	9.22263	9.20745	10.7973	10.9873	10.8576	11.0499	10.9834	10.9195
Sqle	squalene epoxidase	15	59146632	59162747	+	ENSMUSG00000022351	0.254464	0.880636	0.619749	0.359805	0.0412638	-0.0163046	-0.0261108		10.4221	10.5071	10.4643	10.4215	10.4375	10.1601	11.0536	10.8811	10.8671	10.9638	10.8961	10.7782	10.1486	10.1378	10.2873	10.2838	10.2619	10.1389	10.6295	10.823	10.8145	10.8032	10.9367	10.9869
E430025E21Rik	RIKEN cDNA E430025E21 gene	15	59163552	59205707	-	ENSMUSG00000022350	1.86424	6.48811	0.188085	0.0196765	0.986867	-0.0150893	0.000510212	0.108582	10.0498	10.1149	10.2378	10.1686	10.1762	10.162	10.2717	10.2738	10.2752	10.2681	10.2909	10.1801	10.1683	10.1358	10.1139	10.0342	10.1106	10.0925	9.96924	10.107	10.2794	10.2048	10.1543	10.1942
Nsmce2	non-SMC element 2 homolog (MMS21, S. cerevisiae)	15	59205753	59433238	+	ENSMUSG00000059586	15.951	9.02812	0.000777	0.00728578	0.440526	-0.00264882	0.010279	0.0585948	8.67622	8.63438	8.60663	8.87236	8.79978	8.69027	9.27424	9.21675	9.21692	9.35823	9.26009	9.35047	8.91606	8.6401	8.62748	8.87151	8.84577	8.82223	9.24226	9.20035	9.1919	9.31868	9.2876	9.10157
Trib1	tribbles homolog 1 (Drosophila)	15	59479905	59488105	+	ENSMUSG00000032501	0.693859	0.0421935	0.415204	0.839436	0.579954	-0.018478	0.0627547		9.24624	8.84277	9.09145	9.08502	9.30492	9.12423	9.17908	8.74147	9.0346	8.42481	9.19964	9.09992	9.72495	9.70222	9.45899	9.61196	9.82408	9.62834	8.41613	8.99343	9.04751	8.92448	8.9383	9.2869
Fam84b	family with sequence similarity 84, member B	15	60650551	60656635	-	ENSMUSG00000072568	0.00904486	0.266384	0.925228	0.611723	0.879217	-0.0299931	0.015606		7.85618	7.75987	7.74367	7.78426	7.64619	7.6512	7.86655	8.11525	8.13897	8.29111	8.31019	8.23601	7.96553	7.82994	7.92879	8.06566	7.9792	8.16919	7.42942	7.91029	8.0576	7.8623	8.14365	7.52723
9930014A18Rik	RIKEN cDNA 9930014A18 gene	15	60654520	60662955	+	ENSMUSG00000044513	0.91858	0.124888	0.349886	0.727683	0.544043	-0.0113892	-0.0460371		5.74572	5.9963	5.21295	5.71355	5.87009	5.85143	4.96352	5.48253	5.19386	5.04928	5.17711	5.15124	5.28246	5.02623	5.86572	5.98173	5.42446	5.36952	5.06493	5.25623	5.14062	5.64604	5.6563	4.73486
Myc	myelocytomatosis oncogene	15	61816946	61821929	+	ENSMUSG00000022346	4.49176	0.753881	0.0474545	0.396085	0.169688	0.068897	0.0333378		5.88367	6.06878	6.06373	5.82052	5.9283	5.88835	5.13469	5.64386	5.75167	5.88989	5.92878	5.76551	6.16831	6.06663	6.38185	5.82275	6.07246	6.33855	6.00319	5.54439	6.12151	5.65671	5.93509	5.79576
Pvt1	plasmacytoma variant translocation 1	15	61869542	62082530	+	ENSMUSG00000072566	0.425982	0.415185	0.521787	0.527053	0.819244	-0.0229728	0.020418		6.66127	6.94848	7.10057	7.07768	6.75427	6.96235	6.61042	6.88264	6.68608	6.65927	6.78026	6.79653	7.19216	6.95972	6.98132	7.18732	6.91719	7.09977	6.06878	6.94032	6.70648	6.78382	6.66689	6.57069
Fam49b	family with sequence similarity 49, member B	15	63760652	63892010	-	ENSMUSG00000022378	0.256313	0.00121141	0.618489	0.972598	0.0390054	-0.0142367	-0.00680795		11.888	11.9421	12.0379	11.9523	11.8121	11.9327	11.8386	11.8529	11.8764	11.9831	11.6316	11.6072	11.9488	11.8411	11.8338	12.019	11.9426	12.0143	11.5635	11.7472	11.7509	11.8049	11.7085	11.7265
Asap1	ArfGAP with SH3 domain, ankyrin repeat and PH domain1	15	63918419	64214481	-	ENSMUSG00000022377	2.2241	6.25813	0.152289	0.021666	0.62508	-0.0166959	-0.00126359	0.115654	12.3648	12.4235	12.5212	12.5757	12.547	12.6597	11.3968	11.4564	11.3611	11.1498	11.2389	11.3596	12.4301	12.4284	12.4039	12.486	12.4246	12.4014	11.0011	11.3313	11.3107	11.2876	11.2277	11.3235
Adcy8	adenylate cyclase 8	15	64530604	64753858	-	ENSMUSG00000022376	1.09447	0.020477	0.30861	0.88772	0.756502	-0.0054649	0.0130734		9.71776	9.28601	9.56331	9.50736	9.33923	9.26247	10.9668	11.1189	11.2009	11.0173	10.9347	11.1616	9.59681	9.69112	9.65261	9.52873	9.65005	9.50303	10.8378	11.1222	11.1446	11.018	10.8726	11.0555
Efr3a	EFR3 homolog A (S. cerevisiae)	15	65618596	65705378	+	ENSMUSG00000015002	1.636	2.18923	0.216276	0.155369	0.688013	-0.000319632	-0.00667841	0.880441	12.2154	12.2323	12.3453	12.3479	12.2702	12.4007	11.6519	11.5594	11.6607	11.4283	11.5203	11.574	12.2043	12.1707	12.1723	12.3498	12.1638	12.2757	11.4388	11.7011	11.7209	11.6207	11.4814	11.5806
Kcnq3	potassium voltage-gated channel, subfamily Q, member 3	15	65826733	66117786	-	ENSMUSG00000056258	10.4928	12.6347	0.00431666	0.00211636	0.910972	-0.0198567	-0.0157638	0.0261184	10.4072	10.54	10.6936	10.4909	10.5669	10.5637	10.287	10.242	10.5647	9.42481	10.3507	10.4231	10.3699	10.4039	10.3681	10.2507	10.0465	10.2454	9.79124	10.3258	10.3593	10.0953	9.9383	10.2435
Lrrc6	leucine rich repeat containing 6 (testis)	15	66211420	66332472	-	ENSMUSG00000022375	0.104843	1.56095	0.74963	0.226699	0.372493	-0.108658	-0.0565076	0.942966	6.88367	6.94848	6.96064	7.07768	6.82642	6.52306	4.13469	3.45943	4.42974	4.60038	4.10566	4.32941	6.50935	6.58121	6.52728	7.00862	6.81531	6.83095	2.57693	3.7559	4.38455	3.57871	5.08193	3.76334
Tmem71	transmembrane protein 71	15	66357774	66392608	-	ENSMUSG00000036944	0.0304788	0.739077	0.863255	0.400674	0.965169	0.0249749	-0.272018		4.07631	2.42492	4.29322	2.78489	3.63879	3.64042	4.22215	3.58496	3.71925	3.88989	3.86465	4.24194	3.26142	2.25928	2.33746	2.50082	3.91719	4.04087	4.03636	4.10382	3.67405	3.86821	2.12773	3.11126
Phf20l1	PHD finger protein 20-like 1	15	66409128	66473502	+	ENSMUSG00000072501	0.1223	0.114055	0.730399	0.739276	0.0238039	-0.0143896	0.00390989		9.27271	9.49906	9.46785	9.41133	9.3996	9.24033	8.7929	8.56605	8.60411	8.10288	8.73165	8.55483	9.38036	9.43254	9.53713	9.65311	9.54787	9.5592	8.42867	8.68878	8.47201	8.68955	8.97322	8.62583
Sla	src-like adaptor	15	66612381	66663391	-	ENSMUSG00000022372	0.557911	0.896384	0.464247	0.35564	0.194762	0.0982546	-0.0133338		7.42209	7.15284	7.50953	7.32095	7.03872	7.06668	5.62654	6	6.06717	5.88989	5.99018	5.66821	7.21562	7.4425	7.13188	7.3588	7.172	7.57485	6.06878	6.73941	6.62401	6.59861	6.74244	6.74685
Wisp1	WNT1 inducible signaling pathway protein 1	15	66722882	66754763	+	ENSMUSG00000005124	0.701407	2.70026	0.412723	0.116778	0.236122	-0.142792	-0.217287	0.32238	7.32424	6.37912	6.96064	6.29586	7.27622	7.01546	4.59412	4.58496	4.06717	4.67838	4.57515	4.0493	5.39071	5.92224	4.86102	5.71028	6.18567	6.23727	3.38428	3.7559	4.21462	4.65671	3.82817	3.62583
Ndrg1	N-myc downstream regulated gene 1	15	66760883	66801202	-	ENSMUSG00000005125	0.595937	0.105178	0.449629	0.749246	0.039112	-0.00146142	0.00182283		10.8696	10.7378	10.6414	10.6228	10.8109	10.7952	12.6278	12.4668	12.3269	12.6101	12.7456	12.7917	10.8771	10.6869	10.7437	10.6993	10.5909	10.4797	12.4185	12.4183	12.5301	12.435	12.4446	12.4875
St3gal1	ST3 beta-galactoside alpha-2,3-sialyltransferase 1	15	66934437	66945922	-	ENSMUSG00000013846	4.55224	17.7155	0.0461302	0.00047548	0.994596	-0.0400142	-0.0289025	0.00945483	9.34622	9.25464	9.47955	9.10682	9.24365	9.2588	9.08013	9.13699	9.1053	9.15155	9.29092	9.17563	8.99613	8.95509	9.3176	8.94377	8.92536	8.95176	8.29117	8.9618	8.97617	8.92054	8.70893	8.87755
Zfat	zinc finger and AT hook domain containing	15	67915328	68090418	-	ENSMUSG00000022335	3.17404	1.07161	0.0908089	0.31358	0.13612	-0.0421763	0.0365418	0.997605	6.49135	7.29529	7.21698	6.97076	6.97666	7.03274	6.82119	7.15987	6.90367	6.45282	6.86465	6.8118	7.14407	7.15005	7.47701	7.02438	7.27793	7.09977	6.38428	6.82003	6.79959	7.2032	7.19382	6.94776
Khdrbs3	KH domain containing, RNA binding, signal transduction associated 3	15	68758850	68923942	+	ENSMUSG00000022332	0.521483	6.42643	0.479004	0.0201891	0.00544547	-0.0134804	4.11407e-05	0.110209	11.8059	11.7161	11.7642	11.9224	11.8536	12.062	11.0654	10.9084	11.0493	11.0734	10.885	11.1473	11.7835	11.6778	11.8263	11.7464	11.6075	11.6439	10.7803	10.8366	10.9611	10.6976	10.5748	10.7218
Fam135b	family with sequence similarity 135, member B	15	71276108	71558268	-	ENSMUSG00000036800	2.49368	5.11156	0.130808	0.0356945	0.580853	0.00732209	-0.0137175	0.157683	9.06878	9.31671	9.33246	9.36081	9.67344	9.48591	7.91605	7.81378	7.77551	7.37297	8.06343	8.19031	9.18624	8.92224	9.22924	9.14468	9.12309	9.17016	7.68545	7.98296	8.00904	7.91658	8.05254	7.99739
Col22a1	collagen, type XXII, alpha 1	15	71626225	71864657	-	ENSMUSG00000079022	0.0152876	1.61067	0.902897	0.219725	0.886412	0.112107	0.0710737	0.936619	5.81328	5.06878	5.25015	5.21785	5.42306	5.09985	3.83513	4.32193	2.84478	3.01542	3.99018	4.14883	5.68769	5.76178	5.82931	5.3588	5.54522	5.74131	4.74685	3.46639	4.02198	4.21614	4.03462	4.69622
Kcnk9	potassium channel, subfamily K, member 9	15	72342549	72376709	-	ENSMUSG00000036760	2.48564	3.80411	0.131394	0.066036	0.424867	-0.0277772	-0.0265002	0.229435	7.90074	8.27041	8.20011	7.87236	8.3996	7.98915	7.11197	7.45121	7.1053	6.53898	7.66261	7.16081	7.92676	7.88377	7.91489	7.85837	7.80648	7.94776	6.40982	7.47637	7.18041	7.32765	7.20455	7.38072
D15Mit105	marker	15	72331040	72331161	marker	marker	marker	marker	marker	marker	marker	marker	marker	marker
D15Mit93	marker	15	72370100	72370243	marker	marker	marker	marker	marker	marker	marker	marker	marker	marker
Trappc9	trafficking protein particle complex 9	15	72420051	72891634	-	ENSMUSG00000047921	0.503749	1.20075	0.486478	0.286869	0.907601	-0.00548773	-0.0043135	0.980332	10.522	10.5124	10.4854	10.5518	10.5092	10.4984	10.8203	10.825	10.7517	10.6264	10.7628	10.8109	10.4926	10.4491	10.4421	10.3666	10.3885	10.2274	10.5684	10.761	10.8897	10.8382	10.7761	10.9057
Chrac1	chromatin accessibility complex 1	15	72920822	72927984	+	ENSMUSG00000068391	0.0321662	0.233354	0.859562	0.634568	0.269305	-0.0128932	-0.0273209		7.6411	7.80863	7.50037	7.63289	7.64877	7.57116	7.75674	7.8009	7.53594	7.78801	7.49268	7.5995	7.53755	7.2289	7.55663	7.51205	7.36464	7.7133	7.27736	7.82003	7.69844	7.8011	7.61155	7.7133
Eif2c2	eukaryotic translation initiation factor 2C, 2	15	72932055	73015377	-	ENSMUSG00000036698	6.99362	7.62421	0.0159869	0.0124294	0.790642	-0.00945775	-0.00178968	0.0821343	11.008	11.2177	11.3162	11.1167	11.3944	11.4291	11.6474	11.5599	11.6332	11.0461	11.6262	11.6745	11.248	11.145	11.089	10.9846	11.019	11.2058	11.2208	11.672	11.6182	11.5992	11.6523	11.6515
Ptk2	PTK2 protein tyrosine kinase 2	15	73035535	73253621	-	ENSMUSG00000022607	0.482317	12.6795	0.49578	0.00208626	0.246066	-0.0144646	-0.0143678	0.0259365	11.8133	12.0099	12.0091	12.0804	12.0321	12.1825	10.8027	10.9114	10.8325	10.8557	10.7628	10.8184	11.7752	11.7255	11.8167	11.825	11.6346	11.7459	10.6295	10.6877	10.7586	10.7114	10.7089	10.6224
Dennd3	DENN/MADD domain containing 3	15	73342990	73402672	+	ENSMUSG00000036661	1.10275	0.513524	0.306837	0.482334	0.899687	0.0262817	0.037066		7.39824	7.31974	7.42492	7.07768	7.19679	7.21027	6.80711	7.01123	6.66921	6.83985	6.79754	7.30803	7.5652	7.6516	7.74685	7.51205	7.25217	7.5003	7.10049	6.98296	6.94254	7.02349	7.25701	7.1368
Slc45a4	solute carrier family 45, member 4	15	73407854	73476192	-	ENSMUSG00000079020	8.56264	3.34424	0.00866469	0.083183	0.138704	-0.00531264	0.00220801	0.264598	10.7032	10.8354	10.8415	10.6846	10.7543	10.7684	11.1005	11.1743	11.0736	10.8588	10.956	10.9993	10.816	10.7658	10.8698	10.7042	10.7581	10.7924	10.7368	11.1443	11.2901	11.1469	11.0607	11.1957
Ptp4a3	protein tyrosine phosphatase 4a3	15	73553575	73589196	+	ENSMUSG00000059895	5.28516	1.57793	0.0330237	0.224286	0.559511	-0.00681705	0.00696302	0.940678	9.9832	10.1765	10.1096	9.90383	10.1109	10.0067	9.82818	10.0471	9.84853	9.75238	9.74952	9.79845	10.1728	10.148	10.1592	9.9623	10.1992	9.92148	9.68545	9.92764	9.90811	9.69649	9.91563	9.92229
Gm628	predicted gene 628	15	73591840	73670129	-	ENSMUSG00000072487	0.393453	0.00356485	0.537956	0.953013	0.254688	-0.00088074	-0.00736568		5.9832	5.42492	5.72932	5.37896	5.79079	5.4984	5.17908	4.75489	4.84478	4.23781	5.04908	4.63426	5.61898	5.62851	5.76372	5.96025	5.81531	5.54337	4.38428	5.46639	4.91506	4.65671	5.12773	5.00435
Gm3244	predicted pseudogene 3244	15	73639937	73640326	-	ENSMUSG00000083380	0.544774	1.70135	0.46948	0.207692	0.518134	-0.0255816	0.00664417	0.925879	9.37948	9.3011	9.3911	9.35809	9.40279	9.23478	9.45975	9.64618	9.44355	9.54136	9.38462	9.52684	9.26873	9.39453	9.59494	9.40774	9.37112	9.44513	9.24648	9.30481	9.26784	9.34236	9.25779	9.44989
Gm15387	predicted gene 15387	15	73924116	73924763	-	ENSMUSG00000082585	1.71028	95.7901	0.206553	7.43e-09	0.804179	-0.135006	-0.107636	1.68213e-06	10.1504	9.99664	10.2564	10.3893	10.1338	10.1896	9.97991	10.07	10.0179	10.287	9.99798	9.98647	8.73224	9.20663	9.19202	8.92318	9.1526	9.03175	8.31333	8.79822	8.89699	8.53884	8.92354	8.86302
Bai1	brain-specific angiogenesis inhibitor 1	15	74346626	74419873	+	ENSMUSG00000034730	4.16237	20.7952	0.055479	0.00021391	0.602936	-0.0329222	-0.0162957	0.00532068	13.3472	13.3358	13.4192	13.32	13.578	13.4926	13.3388	13.5844	13.3952	13.0797	13.3042	13.3536	13.1741	13.0882	13.1863	12.9674	13.2578	13.0038	12.7324	13.0947	13.1639	13.1256	13.0425	13.0844
Arc	activity regulated cytoskeletal-associated protein	15	74499513	74503000	-	ENSMUSG00000022602	0.206369	1.45281	0.654776	0.242876	0.421352	-0.00379512	0.10014	0.955101	13.5351	12.1861	13.0865	12.8588	13.8375	13.3053	10.0654	9.8933	9.61737	10.22	10.5033	10.2178	14.311	14.2763	14.1065	14.0073	14.4427	14.1835	9.77414	9.71853	9.97118	9.77292	10.4875	9.82354
Jrk	jerky	15	74532842	74539965	-	ENSMUSG00000046380	1.65955	0.976953	0.213132	0.335373	0.389449	0.00352513	-0.00892918		7.71892	7.94848	7.83402	7.78462	7.78175	7.99744	7.54408	7.88874	7.49736	7.32527	7.51374	7.81937	7.73675	7.663	7.89182	7.9017	7.77914	7.73203	7.34511	7.86632	7.79959	7.96337	7.72764	7.73017
4930572J05Rik	RIKEN cDNA 4930572J05 gene	15	74551664	74554803	+	ENSMUSG00000056665	3.13444	2.48572	0.0926986	0.131388	0.821365	-0.00198429	0.00499551	0.34391	10.3099	10.2499	10.2892	10.2212	10.3847	10.37	10.1105	10.2621	10.0063	9.95598	10.0917	10.2588	10.3699	10.3128	10.3205	10.0951	10.3266	10.1581	9.69327	10.2434	10.382	10.2048	10.2165	10.2108
Lynx1	Ly6/neurotoxin 1	15	74578286	74583409	-	ENSMUSG00000022594	3.01354	1.00452	0.0987609	0.328813	0.924008	-0.000879891	0.00158596		13.9393	13.9255	13.963	13.917	13.9595	13.9362	14.0131	14.0526	13.9818	13.8606	13.8568	13.8775	13.9738	13.9264	13.994	13.883	13.9448	13.8381	13.7154	14.0645	14.2306	13.9949	13.8759	13.9453
Ly6e	lymphocyte antigen 6 complex, locus E	15	74785481	74790335	+	ENSMUSG00000022587	2.01592	29.9231	0.171857	2.81e-05	0.232462	-0.0642412	-0.025526	0.00115377	12.498	12.3957	12.5012	12.4513	12.5553	12.6621	11.1893	11.3247	11.1508	11.1318	11.1297	11.3307	12.1981	12.0964	12.146	12.0312	12.1655	11.9765	10.2008	10.5217	10.7797	10.3469	10.3323	10.3263
Ly6a	lymphocyte antigen 6 complex, locus A	15	74825308	74828064	-	ENSMUSG00000075602	0.0147637	55.748	0.904566	4.6e-07	0.183876	-0.207241	-0.318206	4.50859e-05	8.87073	8.73781	8.66519	8.43451	8.45755	8.58879	8.8455	9.09011	8.91087	8.74787	8.72715	9.17268	5.98934	6.03187	5.89205	6.30818	5.94961	5.91534	7.29117	6.78832	7.20331	7.47487	7.25701	7.49373
Ly6c1	lymphocyte antigen 6 complex, locus C1	15	74875447	74879260	-	ENSMUSG00000079018	1.70924	0.53659	0.206685	0.47279	0.277742	-0.00695732	0.000557321		9.50816	9.57711	9.48884	9.25087	9.40844	9.43808	9.80357	9.90689	9.66921	9.58256	9.70204	9.9424	9.58376	9.53804	9.46824	9.5329	9.64285	9.4521	9.46143	9.8371	9.87674	9.82573	9.5967	9.78546
Ly6h	lymphocyte antigen 6 complex, locus H	15	75381698	75397685	-	ENSMUSG00000022577	0.510518	1.43399	0.483602	0.245841	0.267929	-0.0297379	0.000128229	0.958616	10.5068	10.5835	10.6341	10.4559	10.5537	10.3836	10.2035	10.4909	10.1772	10.3612	10.3016	10.3121	10.4794	10.4158	10.8333	10.3194	10.5999	10.4989	10.0302	10.0811	9.84216	10.0327	10.6562	10.4072
Zfp41	zinc finger protein 41	15	75447109	75455730	+	ENSMUSG00000047003	0.326732	0.0500276	0.574291	0.825403	0.678096	0.0019269	-0.00367067		7.10606	7.29529	7.43457	7.32095	7.36368	7.31284	7.76405	7.88264	7.66921	7.76137	7.86465	7.74974	7.28379	7.28903	7.18295	7.26901	7.40027	6.84823	7.69587	7.91117	7.75378	7.74863	8.08193	7.67895
Top1mt	DNA topoisomerase 1, mitochondrial	15	75487465	75509230	-	ENSMUSG00000000934	2.13932	0.243363	0.159911	0.627441	0.602458	-0.0122109	0.0208072		7.6411	7.71032	7.55448	7.53978	7.52415	7.6062	8.23798	8.47573	8.26544	8.26966	8.13993	8.29723	7.71263	7.79326	7.87662	7.54522	7.53457	7.65558	8.02814	8.42575	8.22025	8.33359	8.40386	8.38606
Rhpn1	rhophilin, Rho GTPase binding protein 1	15	75534710	75544840	+	ENSMUSG00000022580	0.00745352	0.556121	0.932104	0.464954	0.0872191	0.0218599	0.0340958		7.46863	6.93272	7.12462	7.06288	7.38773	7.11615	6.87616	7.12928	6.84478	6.78801	7.21258	7.07483	7.47088	7.54468	7.24435	7.14468	7.3404	7.27609	7.19164	6.86632	7.24805	6.96337	6.77159	6.73017
Zc3h3	zinc finger CCCH type containing 3	15	75584877	75672338	-	ENSMUSG00000075600	3.57449	0.728061	0.0740238	0.404141	0.505911	-0.00591682	0.0433419		8.23954	8.47477	8.28321	8.36383	8.45186	8.43483	8.53557	8.76818	8.55443	8.29464	8.58015	8.72302	8.86134	8.663	8.55663	8.21073	8.44075	8.56965	8.17684	8.74767	8.78068	8.59722	8.73876	8.62583
Gsdmd	gasdermin D	15	75692769	75697834	+	ENSMUSG00000022575	4.71707	8.66632	0.0427305	0.00833395	0.647139	-0.0488527	-0.0668796	0.0638796	5.77675	4.94848	5.76034	5.36986	4.86118	5.4984	5.30461	5.20945	5.54522	5.07431	5.5345	5.63426	4.96186	4.99624	5.42492	5.02438	5.15819	5.26326	4.38428	5.46639	5.42408	5.26676	4.93509	5.11126
Naprt1	nicotinate phosphoribosyltransferase domain containing 1	15	75721394	75724911	-	ENSMUSG00000022574	1.13703	2.01789	0.299644	0.171659	0.460932	0.0538375	0.00569213	0.894716	6.01491	5.37912	5.52768	5.82052	5.51326	5.59461	6.65825	6.08746	6.1178	6.80549	6.16011	6.28634	5.72085	5.37476	5.92242	5.02438	5.58704	5.54337	6.91678	6.42575	6.53655	6.6376	6.68232	6.76334
Eef1d	eukaryotic translation elongation factor 1 delta (guanine nucleotide exchange protein)	15	75725226	75739986	-	ENSMUSG00000055762	3.44377	10.3926	0.0790706	0.0044695	0.563423	-0.0104445	-0.00297256	0.043666	10.1316	10.1865	10.1453	10.0814	10.2019	10.1931	10.4712	10.6582	10.5184	10.6436	10.5739	10.6952	10.1486	10.0428	10.1814	9.93127	10.1319	10.1407	10.2739	10.49	10.5534	10.5419	10.519	10.4726
Tigd5	tigger transposable element derived 5	15	75740221	75742136	+	ENSMUSG00000047166	3.78113	0.476119	0.066789	0.498528	0.127227	0.00183719	0.0153975		5.95078	6.00988	6.27184	6.01755	6.14129	6.03274	5.86261	6.22882	6.28218	5.33735	5.95981	6.19614	6.16831	6.10058	6.24435	6.05541	6.56628	6.07062	5.96924	6.34086	6.09727	6.36298	6.35655	6.18655
Pycrl	pyrroline-5-carboxylate reductase-like	15	75746893	75751990	-	ENSMUSG00000022571	7.50572	5.55528	0.0130236	0.029307	0.242406	-0.0030672	0.0219154	0.139178	7.68117	7.94062	7.96064	7.60252	8.09092	8.14026	8.59002	8.633	8.46927	8.26335	8.62439	8.8118	7.93385	8.01417	8.15124	7.81371	7.78867	7.79576	8.45344	8.51078	8.64925	8.60845	8.61155	8.51823
Tsta3	tissue specific transplantation antigen P35B	15	75755114	75760160	-	ENSMUSG00000022570	1.73978	4.03883	0.202844	0.0588829	0.184777	-0.0242614	-0.00882268	0.213549	8.07631	8.07597	8.01311	7.86384	8.15537	8.00674	8.17908	8.50383	8.20233	8.09579	8.30004	8.3347	7.97567	7.9317	8.04482	7.88453	7.9007	8.05582	8.01155	8.15444	8.11549	8.37457	8.12773	8.35919
Zfp623	zinc finger protein 623	15	75771382	75779807	+	ENSMUSG00000050846	0.0107731	0.0318983	0.918421	0.860142	0.191585	-0.00167102	0.0263857		7.93429	7.55421	7.90619	7.9224	8.00802	7.68481	7.72715	7.82655	7.7912	7.77918	7.95211	7.99683	8.04933	7.9317	8.03095	7.87586	7.66721	7.91534	7.71648	7.83562	7.75378	7.91658	7.81423	7.8585
Zfp707	zinc finger protein 707	15	75799553	75806298	+	ENSMUSG00000034429	0.216677	0.41892	0.646875	0.52522	0.4129	-0.0170731	-0.0116444		7.82227	7.75584	7.66519	7.48533	7.69768	7.67384	7.57763	7.93664	7.42974	7.63013	7.63404	7.44162	7.53755	7.663	7.77209	7.34631	7.71514	7.64573	7.29117	7.68017	7.58095	7.79249	7.61155	7.45365
2410075B13Rik	RIKEN cDNA 2410075B13 gene	15	75810302	75812715	-	ENSMUSG00000044095	0.00546167	3.21217	0.94186	0.089032	0.236436	-0.0475747	-0.0338849	0.275417	7.03051	6.7287	6.86397	6.63289	6.53495	6.7697	6.82119	6.82018	6.75167	6.83985	6.84816	6.8118	6.63646	6.62851	6.65939	6.71028	6.6075	6.58519	6.38428	6.65402	6.38455	6.36298	6.74244	6.55183
Fam83h	family with sequence similarity 83, member H	15	75831523	75844766	-	ENSMUSG00000046761	0.190174	0.466173	0.667687	0.502994	0.6091	-0.0330228	0.000717608		6.10606	6.65374	6.27184	6.44025	6.08358	6.28427	6.54408	6.88264	6.46927	6.5802	6.55497	6.68489	6.09431	6.34674	6.60425	6.40771	6.45775	5.81346	6.06878	6.56325	6.60694	6.74863	6.48528	6.67895
K230010J24Rik	RIKEN cDNA K230010J24 gene	15	75839499	75865669	+	ENSMUSG00000075594	0.0982764	0.191661	0.757323	0.666474	0.470399	-0.239736	0.201713		1.49135	2.42492	1.79072	2.46297	1.46887	0.640418	2.94204	3	2.58174	2.43046	2.40522	3.24194	3.26142	1.67432	1.92242	1.50082	2.04272	1.45591	0.576925	3.10382	2.79959	3.73071	2.93509	2.88887
Scrib	scribbled homolog (Drosophila)	15	75877588	75900214	-	ENSMUSG00000022568	0.359498	1.34153	0.555869	0.261117	0.494968	0.000339108	0.0303264	0.966005	9.66877	9.79124	9.6487	9.59225	9.79305	9.70381	10.4408	10.6193	10.3904	10.2019	10.5332	10.5514	10.0639	9.97352	9.95401	9.88453	10.1231	9.97947	10.4334	10.5289	10.4989	10.5598	10.7108	10.4447
Puf60	poly-U binding splicing factor 60	15	75900614	75911376	-	ENSMUSG00000002524	0.855145	0.571341	0.366698	0.458996	0.844313	-0.00716593	0.00547441		11.2056	11.1554	11.2149	11.0868	11.1217	11.107	11.4983	11.556	11.3124	11.4584	11.4727	11.5343	11.2817	11.2231	11.2548	11.0506	11.2993	11.0953	11.2117	11.3806	11.5281	11.4038	11.4946	11.472
Nrbp2	nuclear receptor binding protein 2	15	75916025	75920443	-	ENSMUSG00000075590	0.267366	0.0242027	0.611072	0.878011	0.614016	0.00388358	0.00204138		10.6613	10.7978	10.8451	10.5897	10.9707	10.6807	12.3405	12.5512	12.1455	12.1828	12.4077	12.2633	10.7249	10.7881	10.8571	10.7272	10.8208	10.5929	12.3251	12.4264	12.4295	12.4559	12.6047	12.4358
BC024139	cDNA sequence BC024139	15	75949947	75957026	-	ENSMUSG00000044361	3.91838	6.90714	0.0624354	0.0165586	0.449776	0.146417	0.0107506	0.0981019	3.2987	1.42492	2.79072	2.78489	2.05383	2.96235	4.99267	4.70044	4.71925	5.38465	4.57515	4.76551	3.26142	1.67432	2.65939	3.08578	3.91719	3.45591	6.50766	5.34086	4.67405	5.8011	5.554	5.11126
Plec	plectin	15	76001405	76063004	-	ENSMUSG00000022565	8.23545	5.16392	0.00980876	0.034864	0.706192	-0.00718932	0.00746484	0.15539	12.2861	12.4482	12.4423	12.2695	12.5819	12.4898	12.0324	12.2294	12.0648	11.6855	12.0776	12.1126	12.5597	12.4495	12.445	12.1532	12.4891	12.4741	11.8087	12.0726	12.184	12.0815	12.182	12.0963
Parp10	poly (ADP-ribose) polymerase family, member 10	15	76061604	76073871	-	ENSMUSG00000063268	0.32654	0.195496	0.574402	0.663373	0.301998	-0.0221697	-0.03541		6.49405	6.04902	5.41793	5.82263	5.28136	5.89516	5.81501	6.09233	5.78338	5.38465	5.72967	6.00509	5.90931	5.43294	5.98276	5.59083	5.50608	5.74279	5.48382	5.87026	5.94445	5.87574	5.93766	5.94978
Grina	glutamate receptor, ionotropic, N-methyl D-aspartate-associated protein 1 (glutamate binding)	15	76077237	76080334	+	ENSMUSG00000022564	2.74232	1.31063	0.114146	0.266498	0.804649	-0.00149046	0.00149077	0.967874	12.7894	12.7452	12.7924	12.7073	12.8303	12.8088	13.0457	13.1887	12.9351	12.8117	12.9888	13.038	12.7867	12.7776	12.8198	12.6761	12.8751	12.5881	12.8257	13.1184	13.167	13.0212	13.0572	13.0924
Oplah	5-oxoprolinase (ATP-hydrolysing)	15	76127027	76158445	-	ENSMUSG00000022562	3.94147	3.67929	0.0617357	0.0702469	0.787111	0.00105016	-0.0134315	0.23846	9.13333	8.96237	9.11975	8.78679	8.8284	8.90781	9.25485	9.49997	9.15548	9.23229	9.5409	9.50749	8.78483	8.98879	9.07629	8.50645	9.02605	8.8453	8.8537	9.54135	9.54455	9.46761	9.52806	9.35821
Exosc4	exosome component 4	15	76157827	76161107	+	ENSMUSG00000034259	2.77818	2.31936	0.111957	0.144243	0.527069	0.00304401	-0.000435936	0.361013	8.36492	8.35223	8.45192	8.66548	8.40273	8.24679	8.13204	8.28512	8.03921	8.28663	8.08125	8.24493	8.58263	8.2565	8.31897	8.37734	8.5366	8.37882	8.1381	8.18691	8.2058	8.30651	8.35775	8.39846
Gpaa1	GPI anchor attachment protein 1	15	76161661	76165337	+	ENSMUSG00000022561	3.16806	1.13705	0.0910916	0.29964	0.376676	-0.0119814	0.0200476	0.989206	9.03438	9.05063	9.0884	8.93464	9.13064	9.05827	9.42009	9.59991	9.40702	9.24744	9.45507	9.61481	9.2586	9.25174	9.20782	9.07068	9.22263	9.1389	8.88071	9.55856	9.64716	9.66381	9.62758	9.65705
Cyc1	cytochrome c-1	15	76173953	76176364	+	ENSMUSG00000022551	0.038742	0.0001152	0.846051	0.991548	0.508174	-0.00262686	0.0121234		11.4836	11.4843	11.4637	11.5223	11.5557	11.5398	11.7794	11.8925	11.7172	11.8082	11.821	11.9315	11.6343	11.5346	11.6801	11.5689	11.7122	11.4303	11.62	11.8264	11.8499	11.8455	11.8441	11.8147
Sharpin	SHANK-associated RH domain interacting protein	15	76177470	76181541	-	ENSMUSG00000022552	0.81256	0.812441	0.37865	0.378684	0.174545	-0.0248655	0.00727459		9.13159	9.03963	9.21977	9.09959	8.91181	9.22162	9.43161	9.54496	9.40192	9.31615	9.41924	9.46353	9.1194	9.26303	9.20782	9.23891	9.28112	9.0028	8.84839	9.37861	9.44584	9.49625	9.581	9.40982
Maf1	MAF1 homolog (S. cerevisiae)	15	76181724	76184810	+	ENSMUSG00000022553	0.906729	0.666173	0.352941	0.424504	0.394305	-0.00771716	0.00474042		10.3725	10.2419	10.2732	10.2262	10.2535	10.2514	10.122	10.2644	10.1271	10.1669	10.1501	10.357	10.3085	10.2742	10.4512	10.4256	10.3556	10.2761	9.81533	10.1699	10.2928	10.2496	10.2825	10.2063
Fam203a	family with sequence similarity 203, member A	15	76199328	76201833	+	ENSMUSG00000022554	2.25939	6.18769	0.149246	0.0223201	0.51294	-0.0487073	-0.0187638	0.11826	7.31153	7.30757	7.42492	7.12118	7.44615	7.09985	7.43847	7.65105	7.28218	7.19864	7.56509	7.59067	7.09431	7.10058	7.43549	7.26901	7.11596	6.9637	6.66439	7.20335	7.4143	7.1367	7.45865	7.23464
Heatr7a	HEAT repeat containing 7A	15	76210691	76283468	+	ENSMUSG00000022558	4.20423	4.90774	0.0543773	0.0391496	0.551833	-0.0171705	0.00370464	0.166367	10.9018	11.1306	11.1066	10.9875	11.1925	11.1462	11.4402	11.5873	11.3506	11.0304	11.4269	11.4863	11.1364	11.0164	11.1089	10.9806	11.1451	10.9458	10.9821	11.3497	11.456	11.3925	11.3655	11.3814
Bop1	block of proliferation 1	15	76283426	76307699	-	ENSMUSG00000022557	6.7825	6.10866	0.0174237	0.0230807	0.552175	-0.00942857	0.00765727	0.120139	9.82674	10.0831	9.96564	9.97867	10.1289	10.0392	9.91112	10.0954	9.97406	9.73195	9.89908	9.92318	10.0591	9.98493	10.0603	9.84955	9.98718	9.88636	9.65907	9.96002	10.0788	9.84757	9.89757	9.87755
Scx	scleraxis	15	76287868	76289898	+	ENSMUSG00000034161	0.0105729	1.13219	0.91918	0.300645	0.0894565	-0.0411108	0.192468	0.990354	3.66127	5.23228	4.72932	4.9224	5.16931	4.81034	4.71965	5.24793	5.34728	5.18534	5.04908	4.0493	5.34889	5.4292	5.46674	5.30818	6.18567	5.91534	4.66439	5.05135	4.96951	5.99374	6.08193	5.73017
Hsf1	heat shock factor 1	15	76307875	76331402	+	ENSMUSG00000022556	5.27764	12.7844	0.0331347	0.00201766	0.0131574	-0.0120722	0.00226767	0.0253534	9.0574	9.1426	9.32469	9.11402	9.52415	9.58586	9.37786	9.69523	9.42974	9.3039	9.56761	9.84557	9.31127	9.1214	9.15444	8.85397	9.05767	9.01815	9.36809	9.38127	9.40938	9.19995	9.38983	9.31513
Dgat1	diacylglycerol O-acyltransferase 1	15	76332445	76342381	-	ENSMUSG00000022555	2.44208	0.0763753	0.134622	0.785255	0.053464	0.00770161	0.0134943		8.1424	8.33781	8.26104	8.00212	8.17622	8.22538	8.50101	8.87652	8.60854	8.43608	8.61954	8.66821	8.2387	8.4491	8.38731	8.45502	8.54522	8.22409	8.54271	8.75999	8.88351	8.96337	8.82122	8.87755
Scrt1	scratch homolog 1, zinc finger protein (Drosophila)	15	76346633	76352559	-	ENSMUSG00000048385	3.44091	0.779276	0.0791855	0.388395	0.789639	0.00177375	0.00751346		12.4772	12.4386	12.5121	12.3729	12.5865	12.5162	12.6213	12.7518	12.5823	12.3177	12.587	12.7323	12.6795	12.4561	12.5735	12.4375	12.6648	12.4385	12.3717	12.7825	12.8684	12.7619	12.6151	12.717
Fbxl6	F-box and leucine-rich repeat protein 6	15	76366160	76369176	-	ENSMUSG00000022559	7.88056	5.94579	0.011245	0.0247422	0.727072	-0.0135015	0.00561567	0.125378	8.41021	8.59985	8.51409	8.32095	8.39368	8.51078	8.0772	8.41363	8.11156	8.08151	8.10566	8.30264	8.47088	8.56913	8.62748	8.38957	8.56104	8.35073	7.89885	8.18521	8.18617	7.99374	8.25701	8.16809
Slc52a2	solute carrier protein 52, member 2	15	76369373	76372560	+	ENSMUSG00000022560	0.043098	0.517899	0.83775	0.480499	0.90968	0.00203055	0.0275129		7.82227	8.01738	7.77561	7.89759	7.86974	7.75936	7.98644	8.09276	7.71925	7.89806	7.98265	7.96304	7.93385	8.14192	8.18921	7.94377	8.07981	7.7227	7.63221	8.15444	8.06011	8.12303	8.10501	8.18655
Adck5	aarF domain containing kinase 5	15	76406788	76426246	+	ENSMUSG00000022550	2.65597	0.288331	0.119629	0.597524	0.817059	0.00459309	0.0153504		7.6411	7.8258	7.75265	7.58191	7.80872	7.9442	7.55254	7.87036	7.8144	7.48574	7.72715	7.64282	7.91248	7.71871	7.94479	7.64037	7.89238	7.58519	7.79609	7.7559	7.79205	7.90064	7.95428	7.83529
Cpsf1	cleavage and polyadenylation specific factor 1	15	76426239	76438021	-	ENSMUSG00000034022	2.48073	0.85777	0.131753	0.365979	0.81783	0.00300074	0.0107741		9.93429	9.94062	10.1006	9.93261	10.0982	10.2178	10.1804	10.3674	10.0752	10.1046	10.1297	10.3026	10.121	10.023	10.1544	10.0477	10.0853	9.8947	10.0343	10.3049	10.3758	10.3395	10.3505	10.3524
Vps28	vacuolar protein sorting 28 (yeast)	15	76452518	76456457	-	ENSMUSG00000062381	0.576515	0.0112937	0.456999	0.916481	0.321655	-0.00808564	0.00887201		10.2227	10.3482	10.326	10.1806	10.3561	10.2661	10.5849	10.7499	10.5907	10.5713	10.5889	10.5684	10.4549	10.2872	10.4289	10.2822	10.345	10.2519	10.3987	10.6888	10.5799	10.7397	10.7023	10.6865
Tonsl	tonsoku-like, DNA repair protein	15	76456432	76470388	-	ENSMUSG00000059323	0.063429	17.2884	0.80386	0.00053421	0.608935	0.0831151	0.12821	0.0102157	6.73928	7.09735	7.13649	7.09232	7.18311	6.47331	7.66607	7.8009	7.58174	7.28844	7.74507	7.82691	7.92676	8.01417	7.72116	7.40771	7.6075	7.53273	8.40347	8.29646	8.26447	8.40314	8.41775	8.30391
Cyhr1	cysteine and histidine rich 1	15	76473825	76490547	-	ENSMUSG00000053929	1.70942	9.1786	0.206662	0.00689393	0.907964	-0.0145859	-0.0064784	0.0566012	11.6971	11.6067	11.644	11.6172	11.78	11.7132	11.7402	11.8305	11.7172	11.6478	11.7096	11.8423	11.6057	11.4728	11.643	11.4966	11.637	11.4608	11.4326	11.6127	11.7279	11.6971	11.6552	11.6702
Kifc2	kinesin family member C2	15	76491071	76498626	+	ENSMUSG00000004187	0.395576	0.0340846	0.536872	0.855483	0.0290633	-0.0104558	0.00501394		13.7681	13.6952	13.6611	13.6703	13.6655	13.6349	13.0892	13.2232	12.962	12.8876	12.8865	12.9506	13.7685	13.7204	13.8417	13.6814	13.9164	13.7217	12.7362	13.0721	13.0556	13.0889	13.168	13.1189
Ppp1r16a	protein phosphatase 1, regulatory (inhibitor) subunit 16A	15	76502045	76525349	+	ENSMUSG00000033819	0.671947	7.99806	0.422538	0.0107449	0.368102	-0.0322665	-0.0184594	0.0745203	10.6411	10.6501	10.6425	10.5676	10.6747	10.5975	10.385	10.4979	10.2385	10.1601	10.358	10.4768	10.4562	10.3146	10.5735	10.3758	10.5346	10.2141	9.82722	10.1182	10.1717	10.2353	10.2622	10.1896
Gpt	glutamic pyruvic transaminase, soluble	15	76527194	76530105	+	ENSMUSG00000022546	1.02345	0.712823	0.324414	0.409013	0.831844	0.0197286	0.0497382		7.78597	7.97951	7.81308	7.75759	7.83519	7.7697	7.81417	8.00562	7.66069	7.91427	7.78892	7.893	8.2387	8.19788	8.31474	8.12287	8.17885	8.11412	7.38428	8.26801	8.29144	8.12303	8.17212	8.09181
Mfsd3	major facilitator superfamily domain containing 3	15	76531972	76534669	+	ENSMUSG00000019080	0.903465	0.0560666	0.35379	0.815359	0.624673	-0.012674	-0.00125746		6.36762	6.4645	6.59446	6.53743	6.5091	6.49267	6.84412	7.01647	6.59699	6.82002	7.02478	6.92634	6.49024	6.53006	6.38185	6.25571	7.04061	6.2278	6.82257	6.76879	6.60694	6.8595	6.66689	6.50024
Recql4	RecQ protein-like 4	15	76534171	76540906	-	ENSMUSG00000033762	0.0168777	4.07269	0.898	0.0579266	0.0996157	-0.0722192	-0.266881	0.211798	5.67166	5.52169	5.4989	4.60129	5.33627	5.60528	4.7986	5.68734	4.9123	5.34502	5.24669	5.29288	4.43135	4.00917	3.79689	4.67075	5.2201	4.39702	4.75644	4.56025	4.96951	5.02526	4.77159	5.04105
Lrrc14	leucine rich repeat containing 14	15	76541053	76548129	+	ENSMUSG00000033728	1.29878	5.2258	0.2686	0.0339105	0.842484	-0.00936946	-0.0113448	0.152733	9.27143	9.3519	9.3364	9.40331	9.51733	9.3506	9.34539	9.36759	9.16409	9.25379	9.33879	9.37999	9.268	9.0798	9.29474	9.27284	9.24245	9.15756	8.88335	9.20531	9.52721	9.16584	9.2909	9.40683
Lrrc24	leucine rich repeat containing 24	15	76545706	76552603	-	ENSMUSG00000033707	8.06606	0.0313695	0.0104669	0.861293	0.565713	0.00554249	0.0381926		8.96866	9.02584	9.2127	8.87549	9.06696	8.95864	9.10189	9.30017	8.92824	8.67368	8.95612	9.14157	9.33465	9.45541	9.45624	9.11494	9.42059	9.26214	8.89171	9.3198	9.27026	9.15143	9.08683	9.23506
C030006K11Rik	RIKEN cDNA C030006K11 gene	15	76551896	76554275	-	ENSMUSG00000079002	0.0302354	3.18715	0.863796	0.0901931	0.176773	0.00544607	0.0468504	0.277821	7.43386	7.64409	7.41521	7.55043	7.42306	7.36834	8.41546	8.79116	8.67344	8.41345	8.66732	8.47076	7.88348	7.71871	7.94479	7.91021	8.07246	7.62583	8.37783	8.86632	8.77687	8.97484	8.81423	8.85465
Arhgap39	Rho GTPase activating protein 39	15	76554415	76648600	-	ENSMUSG00000033697	1.14328	0.909206	0.298357	0.3523	0.250599	-8.24884e-05	0.0157452		10.4829	10.3497	10.5666	10.4517	10.6685	10.7658	10.0431	10.0768	9.80285	9.7089	10.1501	10.1443	10.6887	10.6006	10.6042	10.4623	10.5702	10.4289	9.91008	10.0159	9.99434	9.92448	10.1735	10.0437
Zfp251	zinc finger protein 251	15	76682578	76701865	-	ENSMUSG00000022526	1.11327	0.00695066	0.304605	0.934429	0.246028	-0.00660922	0.0084685		10.128	10.0396	10.1787	10.0629	10.0927	10.0709	9.67385	9.68825	9.64352	9.58527	9.56004	9.53427	10.2171	10.2096	10.1767	10.11	10.2009	10.2175	9.41928	9.68017	9.71447	9.7011	9.58921	9.58236
Zfp7	zinc finger protein 7	15	76709706	76722825	+	ENSMUSG00000033669	0.307545	1.48548	0.58566	0.237836	0.027902	-0.0528329	-0.00792137	0.950153	7.43386	7.4802	7.75265	7.62284	7.68803	7.57116	7.64248	7.65105	7.63485	7.30082	7.49268	7.5995	7.62775	7.54468	7.31474	7.59885	7.58704	7.62583	6.84371	7.58187	7.29144	7.68491	7.71269	7.73017
Commd5	COMM domain containing 5	15	76730340	76731735	+	ENSMUSG00000055041	0.0109725	2.4124	0.917672	0.136876	0.155212	0.0226716	0.0130253	0.350892	8.17785	8.37329	7.94722	8.01755	7.90349	8.02412	8.02951	8.33539	8.27104	8.37297	8.03458	8.3347	8.32212	8.19788	8.29746	8.44334	8.27153	8.33855	8.09263	8.65841	8.44344	8.55344	8.63553	8.48382
Rpl8	ribosomal protein L8	15	76734501	76736748	+	ENSMUSG00000003970	0.96122	0.406998	0.3392	0.531111	0.785073	-0.00637147	0.0119983		11.9681	11.891	11.8684	11.8798	11.8423	11.951	12.1452	12.2512	12.0816	12.1702	12.1697	12.2511	12.0399	11.9666	12.1496	11.8764	11.9886	11.8074	11.905	12.1301	12.2104	12.1549	12.2666	12.2257
Zfp647	zinc finger protein 647	15	76741281	76748440	-	ENSMUSG00000054967	0.0274335	2.04477	0.870197	0.168969	0.600093	-0.0918586	0.00236297	0.891468	5.24624	5.06878	5.20575	5.36986	5.75427	5.72788	5.91605	6.02237	5.58174	5.33735	5.69062	6.26431	5.68769	4.67432	5.19544	5.02438	5.41195	4.70384	4.74685	5.42575	5.73818	5.86821	5.29766	5.30391
1110038F14Rik	RIKEN cDNA 1110038F14 gene	15	76778974	76781162	+	ENSMUSG00000063236	1.19079	6.27611	0.288815	0.0215025	0.702895	-0.0172354	-0.0151972	0.115186	7.27271	7.43615	7.65696	7.63289	7.57739	7.71723	7.27424	7.71425	7.34728	7.51792	7.27558	7.49933	7.47088	7.2289	7.32614	7.40771	7.48012	7.46714	7.10049	7.43602	7.4143	7.3036	7.23626	7.33733
Rbfox2	RNA binding protein, fox-1 homolog (C. elegans) 2	15	76909420	77137483	-	ENSMUSG00000033565	1.9157	8.44853	0.182375	0.00904578	0.617747	-0.00843283	-0.00818932	0.0672247	12.5768	12.5778	12.6318	12.6168	12.6971	12.6892	12.5281	12.6046	12.5178	12.377	12.4551	12.5577	12.5457	12.4359	12.4954	12.4813	12.5366	12.471	12.318	12.5196	12.4954	12.4992	12.4617	12.4854
1700109K24Rik	RIKEN cDNA 1700109K24 gene	15	76914873	76926744	+	ENSMUSG00000087126	0.633664	0.0201638	0.435848	0.888575	0.32401	-0.0663919	0.0382218		3.2987	3.74685	3.01311	3.78489	4.05383	3.22538	2.94204	3.80735	3.06717	0.430455	1.99018	3.24194	3.43135	3.67432	3.33746	3.08578	3.04272	3.62583	3.74685	2.61839	2.79959	2.99374	4.12773	3.30391
Apol8	apolipoprotein L 8	15	77579043	77585659	-	ENSMUSG00000056656	0.15204	9.76898	0.70093	0.0055687	0.246497	0.0203541	0.0803128	0.0497351	6.68117	6.81724	7.02593	6.76675	6.55633	6.70651	7.27424	7.19967	6.65213	7.08867	6.59504	6.95619	7.49983	7.34674	7.32614	7.3588	7.31573	7.17016	7.03636	7.23898	7.28071	7.22896	7.52861	7.31513
Myh9	myosin, heavy polypeptide 9, non-muscle	15	77591017	77672605	-	ENSMUSG00000022443	2.34019	0.962337	0.142553	0.338926	0.230539	-0.00879313	0.0352302		10.8204	10.7659	10.7739	10.6216	10.9314	11.0916	10.7617	10.9337	10.8001	10.6462	10.9552	11.0292	11.2727	11.3137	10.9139	10.6919	10.9375	10.9044	10.5413	10.7946	10.8739	10.8056	10.8627	10.8559
Txn2	thioredoxin 2	15	77745477	77759436	-	ENSMUSG00000005354	1.31766	4.9824	0.26526	0.0378416	0.967401	-0.0144616	-0.000777799	0.162583	11.1388	11.0733	11.1261	11.0795	11.1404	11.2505	11.1084	11.1542	10.9869	11.0662	11.1203	11.1719	11.141	11.0297	11.1416	11.0726	11.0725	11.0239	10.6117	11.0286	11.1283	11.0308	11.0834	11.0173
Foxred2	FAD-dependent oxidoreductase domain containing 2	15	77770952	77787152	-	ENSMUSG00000016552	0.1369	1.40782	0.715475	0.250043	0.0109647	-0.0647614	-0.00642987	0.963652	8.95487	9.22258	9.12462	8.9387	9.17622	9.1679	8.29456	8.44294	8.51248	8.26966	8.09172	8.22494	9.05584	9.03626	9.03443	9.06688	9.15124	9.11055	7.61035	8.19733	7.80708	8.48024	8.4085	8.22277
Eif3d	eukaryotic translation initiation factor 3, subunit D	15	77789428	77801254	-	ENSMUSG00000016554	0.218149	2.39955	0.645766	0.137866	0.78395	-0.0176879	0.00321011	0.352312	10.4221	10.4802	10.4091	10.587	10.5078	10.4796	10.6305	10.764	10.6185	10.7066	10.5651	10.6703	10.4363	10.4557	10.5198	10.3696	10.5649	10.3999	10.2739	10.5574	10.6155	10.617	10.6055	10.6224
Gm17638	predicted gene, 17638	15	77792104	77797556	+	ENSMUSG00000091802	1.2299	2.22584	0.281267	0.152137	0.0626731	-0.343965	-0.00748857	0.37093	4.58051	4.12758	4.45444	4.37274	4.27725	4.44777	4.22554	4.4614	4.34813	3.88989	3.99138	3.41347	4.26232	4.37586	4.42577	4.50262	5.21638	4.54507	0.576925	3.75721	4.21733	3.73503	4.21604	4.628
Cacng2	calcium channel, voltage-dependent, gamma subunit 2	15	77822178	77950458	-	ENSMUSG00000019146	0.968431	5.55013	0.337438	0.0293733	0.840919	-0.0045289	-0.0154255	0.139319	11.3901	11.4906	11.5021	11.5056	11.5111	11.7429	11.5172	11.4834	11.414	11.4258	11.3378	11.4217	11.3591	11.241	11.2523	11.2494	11.334	11.3099	11.2773	11.4511	11.5303	11.4662	11.3032	11.4884
A730060N03Rik	RIKEN cDNA A730060N03 gene	15	77950136	77974572	+	ENSMUSG00000092375	4.18366	35.646	0.0549155	9.56e-06	0.678007	0.170925	0.211642	0.00051502	7.01193	6.86122	7.06448	6.75777	7.36502	7.31539	6.49716	6.33628	6.47044	5.77386	6.4618	6.56855	8.46888	8.48373	8.4163	8.45246	8.44303	8.30872	7.27917	7.5932	7.73103	7.65519	7.7576	7.76882
Ift27	intraflagellar transport 27	15	77989895	78004538	-	ENSMUSG00000016637	1.53019	0.00395931	0.231156	0.950485	0.523836	-0.0217322	0.00319514		8.31153	8.14602	8.0884	8.37585	8.11992	8.13227	8.38262	8.48382	8.27104	8.402	8.35359	8.52271	8.16229	8.18211	8.27997	7.96025	8.32194	7.92352	8.15435	8.26801	8.16882	8.38033	8.33718	8.11126
Pvalb	parvalbumin	15	78021544	78036830	-	ENSMUSG00000005716	1.4107	3.49103	0.249576	0.0772014	0.0888222	0.0213624	0.00509953	0.252877	11.0276	10.7344	10.8378	10.9306	10.6929	10.7463	11.7558	11.6055	11.271	11.6184	11.6941	11.7423	11.018	10.8417	10.9064	10.9028	10.8576	10.7239	11.6972	11.7818	11.8932	11.5173	11.6905	11.5351
Ncf4	neutrophil cytosolic factor 4	15	78075231	78093010	+	ENSMUSG00000071715	2.34276	0.00952366	0.142346	0.923281	0.299876	-0.113466	-0.0931312		3.66127	4.00988	3.37568	4.46297	3.46887	3.96235	2.94204	3.80735	3.06717	4.23781	4.21258	3.94238	3.72085	2.25928	4.0379	3.96025	4.26511	3.77784	2.57693	3.10382	3.02198	4.73071	3.82817	4.11126
Csf2rb2	colony stimulating factor 2 receptor, beta 2, low-affinity (granulocyte-macrophage)	15	78112940	78136033	-	ENSMUSG00000071714	4.66636	0.337983	0.043745	0.567829	0.231814	0.00154617	-0.0856722		4.61898	4.62656	4.21025	4.63289	5.05383	4.38566	4.30461	4.22882	3.62719	4.51792	4.40522	4.25808	4.61757	3.94335	3.74209	3.36872	4.62768	3.77784	4.03636	4.46639	3.67668	4.25176	4.19554	3.8136
Csf2rb	colony stimulating factor 2 receptor, beta, low-affinity (granulocyte-macrophage)	15	78156420	78181431	+	ENSMUSG00000071713	0.804517	0.250504	0.380971	0.622468	0.900298	-0.00707002	0.0717564		4.53749	5.26287	4.10783	4.71089	4.63879	4.93246	4.59412	5.01123	4.76316	4.75238	4.79754	4.98718	4.75456	5.09116	5.06047	4.6465	4.77968	5.09977	3.89885	5.29646	5.07161	5.29874	4.99711	4.66918
Tst	thiosulfate sulfurtransferase, mitochondrial	15	78229986	78236289	-	ENSMUSG00000044986	0.804829	12.9267	0.380881	0.00192864	0.409118	-0.0433089	-0.0246657	0.024684	8.43386	8.38492	8.46314	8.55572	8.48009	8.35466	9.00505	8.97728	8.97406	9.02665	9.05627	8.97326	8.28379	8.19788	8.17666	8.01652	7.99691	8.0028	8.57128	8.57259	8.64508	8.78816	8.70893	8.77558
Mpst	mercaptopyruvate sulfurtransferase	15	78237142	78244432	+	ENSMUSG00000071711	0.130464	0.0179694	0.721937	0.894773	0.837858	0.00356723	0.0149114		8.6411	8.69171	8.62782	8.58709	8.67832	8.61196	9.20078	9.42626	8.99452	9.44726	9.26009	9.32143	8.7928	8.78284	8.77209	8.67075	8.79314	8.74131	8.83431	9.48629	9.3995	9.38892	9.45416	9.50358
Kctd17	potassium channel tetramerisation domain containing 17	15	78258994	78269339	+	ENSMUSG00000033287	7.20289	1.52222	0.0146929	0.232328	0.851662	0.000622681	0.00995248	0.94645	11.064	11.0625	11.1343	11.0118	11.0991	11.105	11.6445	11.7875	11.6207	11.4077	11.5588	11.6593	11.1751	11.1762	11.2406	11.0448	11.2135	11.0371	11.3883	11.8057	11.8804	11.6762	11.6712	11.646
C1qtnf6	C1q and tumor necrosis factor related protein 6	15	78353776	78360055	-	ENSMUSG00000022440	1.17785	3.76187	0.291374	0.0674274	0.720532	-0.0735465	-0.0531217	0.232471	5.44555	5.51238	5.98711	5.63289	5.05383	5.4984	5.38262	5.55459	4.96025	5.82277	5.35942	5.14883	5.01631	5.48167	5.54691	4.30818	5.15819	5.3628	4.82485	4.68878	5.21462	5.26676	5.41313	5.58931
Sstr3	somatostatin receptor 3	15	78367445	78374775	-	ENSMUSG00000044933	1.03138	16.3917	0.322593	0.00068558	0.155727	-0.0756392	-0.0422016	0.0121108	9.62834	9.63924	9.64662	9.72975	9.66116	9.6062	8.02951	8.16992	8.19645	8.05981	8.03458	7.95619	9.20687	9.15813	9.32898	9.23891	9.35862	9.10337	7.06878	7.69734	7.78448	7.79249	7.68232	7.96924
Rac2	RAS-related C3 botulinum substrate 2	15	78389599	78403213	-	ENSMUSG00000033220	0.111736	0.317213	0.741838	0.579874	0.435199	0.0243975	-0.0494713		5.34933	5.37912	5.59807	5.46297	4.99243	5.34086	5.34414	5.42626	4.78338	4.75238	5.2632	4.94238	4.65374	5.31817	5.54691	5.40771	4.77968	4.54337	5.70621	5.15444	5.0726	5.8011	5.41313	5.94776
Cyth4	cytohesin 4	15	78427477	78452449	+	ENSMUSG00000018008	1.74321	5.25112	0.202419	0.033529	0.330789	-0.0121434	-0.0183438	0.151599	7.80423	7.62459	7.67336	7.46297	7.67832	7.75936	7.38262	7.59991	7.3259	7.61036	7.31211	7.57286	7.67928	7.4425	7.55663	7.26901	7.38849	7.33855	7.13151	7.30769	7.59833	7.08121	7.57067	7.28119
Elfn2	leucine rich repeat and fibronectin type III, extracellular 2	15	78500452	78548543	-	ENSMUSG00000043460	3.08931	0.00995424	0.094909	0.921571	0.702468	-0.0087181	0.0430508		10.7951	10.6917	10.8666	10.6761	10.9607	10.8041	10.9501	11.0314	10.9766	10.5126	10.9741	10.8822	11.366	11.2115	11.1688	10.854	11.0944	11.1468	10.6591	11.0438	10.9678	11.0463	10.9981	11.0967
Mfng	MFNG O-fucosylpeptide 3-beta-N-acetylglucosaminyltransferase	15	78586312	78603905	-	ENSMUSG00000018169	0.335255	1.37196	0.569383	0.255956	0.0389055	-0.00606322	0.0321921	0.964322	6.13521	5.88435	6.15995	5.98653	6.19679	6.13227	6.36351	6.04439	5.93224	6.40774	6.35942	6.74974	6.09431	6.40224	6.2682	5.82275	6.07246	5.97947	5.78638	6.25066	6.1919	6.10922	6.19382	5.91862
Card10	caspase recruitment domain family, member 10	15	78605568	78633472	-	ENSMUSG00000033170	1.61759	4.18639	0.218776	0.0548437	0.258352	0.0809746	0.0887152	0.205013	6.46863	6.69171	6.89225	6.50736	6.53495	6.44777	7.02951	7.44294	7.30421	7.22487	7.5345	7.55483	7.31671	7.10058	7.41427	6.69065	7.08711	7.04087	7.9778	7.74767	7.81454	7.94794	7.96693	7.48382
Cdc42ep1	CDC42 effector protein (Rho GTPase binding) 1	15	78673077	78681332	+	ENSMUSG00000049521	0.0377795	1.7269	0.84795	0.204452	0.552484	-0.0342397	-0.00235361	0.924266	8.68117	8.67759	8.5677	8.47419	8.59815	8.71188	10.0295	10.0701	9.79314	10.1601	10.0847	10.1322	8.63646	8.41578	8.81319	8.54522	8.61762	8.11412	9.41928	9.62064	9.82933	9.81179	9.75891	9.67895
Gga1	golgi associated, gamma adaptin ear containing, ARF binding protein 1	15	78707620	78725015	+	ENSMUSG00000033128	3.98042	3.10594	0.0605756	0.0940872	0.82428	-0.00538781	0.00789972	0.283949	10.3952	10.3718	10.4152	10.3132	10.5309	10.4859	10.7074	10.8122	10.6607	10.5789	10.6685	10.8184	10.5352	10.3538	10.5396	10.2338	10.4578	10.3324	10.4596	10.76	10.7873	10.7903	10.7424	10.7978
Sh3bp1	SH3-domain binding protein 1	15	78730097	78749462	+	ENSMUSG00000022436	1.09828	4.22656	0.307793	0.0537998	0.821832	0.0487849	0.111043	0.20266	8.23282	8.25147	8.33828	8.19768	8.53968	8.61472	7.43847	7.40088	7.07999	7.1009	7.1734	7.6809	9.33157	9.11875	9.12862	9.01731	9.28748	8.96228	7.20628	7.74759	8.0348	7.95568	8.20988	7.96924
Pdxp	pyridoxal (pyridoxine, vitamin B6) phosphatase	15	78744349	78749947	+	ENSMUSG00000068221	1.76983	0.0332429	0.199151	0.857258	0.316924	0.00266567	0.00847503		11.655	11.5536	11.6525	11.5504	11.6668	11.5492	11.714	11.7599	11.6676	11.5338	11.6376	11.7996	11.7267	11.6499	11.7799	11.639	11.797	11.5548	11.6342	11.8308	11.7702	11.757	11.9185	11.9071
Lgals1	lectin, galactose binding, soluble 1	15	78757155	78760895	+	ENSMUSG00000068220	0.684194	2.64105	0.418414	0.120608	0.68912	0.0288688	0.0279146	0.328129	8.00705	7.63438	7.68149	7.74837	7.62874	7.59461	6.98018	7.07682	6.75167	7.21182	7.03458	7.31876	8.15624	7.71871	8.09901	7.94377	8.2193	7.77784	6.88071	7.03793	7.49075	7.38606	7.07025	6.96212
Nol12	nucleolar protein 12	15	78765363	78774064	+	ENSMUSG00000033099	1.26819	0.00241677	0.27413	0.961304	0.421543	-0.00185257	0.0300583		8.61029	8.73326	8.50496	8.55043	8.74499	8.7697	8.50538	8.633	8.48382	8.49654	8.35942	8.55028	8.81984	8.89832	8.90731	8.66573	8.97739	8.65067	8.51944	8.41021	8.64508	8.3513	8.59941	8.46378
Triobp	TRIO and F-actin binding protein	15	78778154	78836297	+	ENSMUSG00000033088	3.20917	34.1821	0.0891703	1.25e-05	0.132921	-0.0685647	-0.0558456	0.000650342	7.86639	7.91678	7.93367	7.98653	7.83519	8.13227	8.8592	9.1472	8.81823	8.72047	9.09172	9.05893	7.33824	7.50721	7.54691	6.92709	7.3404	7.0105	8.14678	8.30209	8.53655	8.42001	8.39919	8.32071
H1f0	H1 histone family, member 0	15	78859152	78859689	+	ENSMUSG00000048769	0.502921	0.478665	0.486831	0.497396	0.324303	-0.0204356	0.00418085		8.09126	8.27041	8.13649	8.14947	8.11272	8.19501	8.35386	8.58871	8.34196	8.26966	8.34773	8.24757	8.2387	8.19788	8.16401	8.05541	8.11596	8.04837	7.9778	8.45128	8.33874	8.49093	8.36135	8.45365
Gcat	glycine C-acetyltransferase (2-amino-3-ketobutyrate-coenzyme A ligase)	15	78861304	78872961	+	ENSMUSG00000006378	11.2045	17.1295	0.00338431	0.00055808	0.177885	-0.0183491	0.00662883	0.0105736	7.33684	7.53345	7.72932	7.561	7.61861	7.65165	7.18997	7.57743	7.54522	7.39624	7.47131	7.65133	7.65374	7.51981	7.57586	7.10074	7.41195	7.51119	7.22078	7.23898	7.44344	7.37457	7.44061	7.43319
Ankrd54	ankyrin repeat domain 54	15	78883524	78893323	-	ENSMUSG00000033055	2.06437	0.0848001	0.16704	0.77405	0.256341	0.0071816	0.0391426		7.80423	7.64409	7.73714	7.65279	7.80872	7.85959	7.84205	7.90087	7.7912	7.81416	7.95211	8.21349	7.96878	8.03187	8.09235	7.78622	7.94157	7.93973	7.83431	7.93309	7.93572	7.96337	8.16115	7.91124
Eif3l	eukaryotic translation initiation factor 3, subunit L	15	78905653	78924830	+	ENSMUSG00000033047	1.86841	9.39	0.187614	0.00638265	0.665878	-0.0191667	-0.00511822	0.0537203	10.2142	10.3091	10.1541	10.1686	10.2502	10.2496	10.2208	10.2935	10.1546	10.2362	10.2365	10.2877	10.1425	10.0964	10.2814	10.1137	10.2522	10.1529	9.84605	10.115	10.12	10.0935	10.0848	10.1619
Micall1	microtubule associated monoxygenase, calponin and LIM domain containing -like 1	15	78939413	78967328	+	ENSMUSG00000033039	0.592986	1.99948	0.450736	0.173531	0.257003	0.01444	0.0126757	0.897227	10.3863	10.2923	10.2585	10.3295	10.4746	10.2396	11.5228	11.5343	11.4271	11.5048	11.7147	11.6784	10.4342	10.4854	10.4096	10.2822	10.417	10.0962	11.5208	11.708	11.7534	11.8503	11.8345	11.6463
1700088E04Rik	RIKEN cDNA 1700088E04 gene	15	78965085	78971681	-	ENSMUSG00000033029	0.921095	1.69063	0.349243	0.20907	0.0436159	0.0667532	0.105979	0.927088	5.48864	4.94597	5.28897	5.8021	5.22054	5.56594	6.08609	5.42391	5.7887	6.44481	6.57515	6.29571	5.7123	5.83176	5.84589	5.74761	6.227	5.62423	6.04257	6.29466	6.11621	5.82562	6.32426	6.06971
Polr2f	polymerase (RNA) II (DNA directed) polypeptide F	15	78971797	78982197	+	ENSMUSG00000033020	0.10094	0.991913	0.75417	0.331791	0.240038	-0.00514128	-0.00339438		8.67622	8.63438	8.49577	8.44596	8.65374	8.49217	8.73832	8.77808	8.7069	8.9183	8.76277	8.78498	8.56063	8.52606	8.63208	8.38347	8.41776	8.21746	8.53112	8.7843	8.77304	8.6424	8.72019	8.80773
Sox10	SRY-box containing gene 10	15	78985343	78994920	-	ENSMUSG00000033006	0.803985	2.47918	0.381125	0.131867	0.649934	-0.0329778	-0.031356	0.344628	9.37399	9.26097	9.15412	9.18064	9.20358	9.09575	10.8334	10.9166	10.5289	10.8356	10.9684	10.9758	9.1287	8.84424	8.94479	8.78159	8.92943	8.46714	10.1619	10.436	10.6166	10.6048	10.6727	10.4663
Gm10863	predicted gene 10863	15	78996471	79057954	+	ENSMUSG00000075555	0.152234	0.517375	0.700749	0.480718	0.941937	0.0010654	-0.110228		3.66127	3.59485	3.52768	2.78489	4.16931	3.22538	5.26397	4.64386	5.06717	4.43046	5.31211	5.0493	3.26142	2.67432	3.65939	2.82275	3.26511	2.45591	4.74685	5.50592	4.73818	5.05264	5.41313	4.62583
Pick1	protein interacting with C kinase 1	15	79059603	79087104	+	ENSMUSG00000068206	0.290848	0.020243	0.595941	0.888359	0.689219	-0.00595562	0.00233262		9.77212	9.83431	9.67658	9.69659	9.79458	9.66023	10.0371	10.1692	10.0704	9.98045	9.98827	10.0493	9.77712	9.72275	9.85144	9.70346	9.71115	9.60301	9.94543	10.0974	10.0536	10.0723	10.0784	10.0216
Pla2g6	phospholipase A2, group VI	15	79116658	79158820	-	ENSMUSG00000042632	0.587736	5.02525	0.452717	0.0371134	0.167394	0.0480775	0.0457048	0.161185	8.66127	8.63924	8.7794	8.72035	8.83519	8.56523	8.65039	8.78136	8.53594	8.69724	8.885	8.87494	9.19216	8.9317	9.14803	8.76292	9.0314	8.98339	8.88526	9.11345	9.21744	9.1333	9.16939	9.04874
Maff	v-maf musculoaponeurotic fibrosarcoma oncogene family, protein F (avian)	15	79178108	79189506	+	ENSMUSG00000042622	0.763296	2.59864	0.393208	0.123442	0.300712	-0.0476099	0.183949	0.333038	4.81328	4.23228	3.52768	4.04793	5.71679	4.09985	5.80711	5.52356	5.30421	5.28844	5.21258	4.94238	5.1194	4.84424	4.92242	4.82275	5.70568	5.84823	5.33181	5.29646	5.21462	5.73071	5.48528	5.88887
Tmem184b	transmembrane protein 184b	15	79191114	79233733	-	ENSMUSG00000009035	2.17943	0.0389541	0.156248	0.845636	0.400073	-0.00722401	0.0244866		10.8794	10.8668	10.8604	10.815	10.859	10.7529	11.2162	11.2615	11.0752	10.9343	11.1143	11.2192	11.088	11.11	11.2071	11.0185	11.1355	11.054	10.8989	11.2183	11.1933	11.135	11.1666	11.2317
Csnk1e	casein kinase 1, epsilon	15	79248286	79274349	-	ENSMUSG00000022433	7.58472	16.9028	0.012624	0.00059422	0.861991	-0.0211194	-0.0023037	0.0109556	11.118	11.1647	11.2072	11.0619	11.2329	11.2579	11.0947	11.2796	11.1508	11.0294	11.1177	11.2993	11.1356	11.1162	11.1608	10.9479	11.1133	10.9568	10.6881	11.0721	11.057	10.971	11.0986	11.0403
Kcnj4	potassium inwardly-rectifying channel, subfamily J, member 4	15	79314148	79335671	-	ENSMUSG00000044216	0.61365	0.00908539	0.443073	0.925061	0.924796	-0.0228382	-0.00736551		11.1531	11.2226	11.2093	11.1634	11.136	10.9903	8.17361	8.13443	7.48863	8.79678	8.81885	8.16676	11.0864	11.0698	11.1814	11.0116	11.2554	11.0989	7.43491	7.79631	8.02198	7.80966	9.27239	8.01815
Kdelr3	KDEL (Lys-Asp-Glu-Leu) endoplasmic reticulum protein retention receptor 3	15	79346838	79358169	+	ENSMUSG00000010830	1.5444	12.4387	0.229083	0.00225367	0.132071	-0.272578	-0.498749	0.0273028	3.66127	3.59485	3.90619	3.78489	3.05383	2.96235	3.30461	3.70044	4.34728	4.51792	4.31211	4.48987	0.261423	2.99624	2.33746	2.50082	2.04272	3.04087	2.16189	2.88143	3.21462	3.40878	4.29766	3.88887
Ddx17	DEAD (Asp-Glu-Ala-Asp) box polypeptide 17	15	79358137	79377171	-	ENSMUSG00000055065	2.28719	4.06723	0.146902	0.0580795	0.903729	-0.00842509	0.00186812	0.21205	12.6846	12.6891	12.7924	12.6891	12.8453	12.7835	12.9956	13.0949	12.9258	12.7761	13.0525	13.0786	12.743	12.7401	12.7543	12.6464	12.7458	12.7189	12.8287	12.9279	12.931	12.9518	13.0848	12.87
4933432B09Rik	RIKEN cDNA 4933432B09 gene	15	79440006	79489386	-	ENSMUSG00000042564	1.90741	1.6222	0.18328	0.218147	0.128685	-0.0144236	-0.0269316	0.932625	7.16377	6.71032	7.23918	7.00212	7.02345	6.34086	6.64248	6.74147	6.36834	6.45282	6.65315	6.56387	6.84639	6.67432	7.02396	6.94377	7.21264	6.93164	6.57693	6.50592	6.38455	6.74863	7.02255	6.16189
Cby1	chibby homolog 1 (Drosophila)	15	79489657	79498090	+	ENSMUSG00000022428	0.45941	2.12359	0.506071	0.161376	0.431731	0.00393985	0.0211809	0.885017	9.16377	9.16639	9.04496	9.24104	9.17277	9.13627	9.05653	9.11374	8.91803	9.10641	9.06343	9.03636	9.32482	9.22121	9.40892	9.14107	9.37064	9.14591	8.89885	9.08437	9.2118	9.20644	9.18301	8.99041
Tomm22	translocase of outer mitochondrial membrane 22 homolog (yeast)	15	79501291	79503292	+	ENSMUSG00000022427	0.0466294	24.8524	0.831337	8.22e-05	0.772888	-0.0468427	-0.0476451	0.00255898	10.0208	9.98143	10.0792	10.0366	10.1294	10.037	9.97074	10.014	10.0752	10.2633	10.0437	9.87494	9.65374	9.46222	9.53222	9.60148	9.6745	9.57485	9.30824	9.59567	9.74795	9.67557	9.52434	9.65485
Josd1	Josephin domain containing 1	15	79504680	79518302	-	ENSMUSG00000022426	7.9436	0.543395	0.0109735	0.470035	0.67788	0.00478914	0.00905067		11.2772	11.2299	11.37	11.2727	11.3803	11.4103	10.6634	10.7423	10.7396	10.7285	10.6194	10.7478	11.3562	11.4133	11.4143	11.4189	11.4486	11.4524	10.6644	10.8092	10.8256	10.8011	10.7698	10.8226
Gtpbp1	GTP binding protein 1	15	79521326	79551909	+	ENSMUSG00000042535	1.57311	0.182273	0.224967	0.674226	0.3085	-0.000919758	0.0100468		9.9852	10.146	10.1335	10.0977	10.2137	10.1737	10.083	10.2252	10.0461	9.95598	10.0987	10.1946	10.1608	10.225	10.1829	10.3049	10.2906	10.177	9.89885	10.1388	10.2888	10.2884	10.2085	10.2108
Sun2	Sad1 and UNC84 domain containing 2	15	79554500	79572966	-	ENSMUSG00000042524	0.706335	0.436661	0.411115	0.516671	0.202181	-0.00282885	0.0172441		10.4132	10.3197	10.3466	10.3069	10.2204	10.1482	10.5398	10.6193	10.4922	10.3861	10.5876	10.6353	10.477	10.5307	10.6078	10.5723	10.5741	10.4727	10.3031	10.6105	10.6482	10.5712	10.6919	10.5939
Gm16576	predicted gene 16576	15	79573128	79587824	+	ENSMUSG00000087543	0.183964	0.0571033	0.672813	0.813693	0.627534	0.0162962	0.111542		4.39824	4.12536	3.79072	4.36986	3.46887	4.44777	5.26397	5	4.96025	4.82277	5.10566	5.28634	4.65374	4.99624	4.0379	3.67075	4.26511	3.91534	4.27736	5.42575	5.76921	5.45318	5.554	5.2108
Dnalc4	dynein, axonemal, light chain 4	15	79591883	79608279	-	ENSMUSG00000022420	0.802869	13.9526	0.381449	0.00140217	0.537415	-0.0588963	-0.0220191	0.0197604	9.38313	9.54386	9.47955	9.43451	9.46604	9.44132	9.1375	9.10329	9.00128	9.12742	9.11258	9.2836	9.10063	9.32895	9.35148	9.08578	9.25217	9.11055	8.29117	8.57723	8.76921	8.88046	9.01647	8.75512
Nptxr	neuronal pentraxin receptor	15	79616783	79635196	-	ENSMUSG00000022421	9.34111	5.36076	0.00649703	0.0319322	0.043372	-0.0309534	0.0138881	0.146787	12.9254	13.1047	13.1748	12.6452	13.2917	13.0552	12.0203	12.185	12.0432	11.1375	11.8009	12.394	13.1291	13.2075	13.4128	12.9412	13.5291	13.4452	11.2188	12.1589	11.7487	11.7389	12.5402	12.5534
Cbx6	chromobox 6	15	79654326	79665118	-	ENSMUSG00000089715	0.0215164	0.00975868	0.884926	0.922343	0.094311	-0.0122759	-0.000310091		14.9349	14.8513	14.8896	14.9443	14.8289	14.8002	14.1448	14.128	13.954	13.9199	13.7399	14.0234	14.8557	14.9259	14.8804	14.9488	14.9334	14.7958	13.8752	13.9308	13.9025	13.8323	13.9468	14.0371
Apobec3	apolipoprotein B mRNA editing enzyme, catalytic polypeptide 3	15	79722089	79746336	+	ENSMUSG00000009585	0.051791	2.39989	0.822407	0.137841	0.959971	-0.0351903	-0.0705615	0.352312	6.04625	5.86587	6.01311	5.9348	5.99054	5.54731	5.82287	6.02901	6.06871	5.46696	6.25747	5.90984	5.61933	5.55549	5.48558	5.21452	5.72379	5.31439	5.74685	6.02873	5.51438	5.55812	5.91668	5.42658
Cbx7	chromobox 7	15	79746237	79801549	-	ENSMUSG00000053411	3.37503	20.7751	0.081885	0.00021499	0.11124	-0.044546	-0.0293566	0.00532289	10.2906	10.1931	10.1959	10.0592	10.212	10.2551	10.3454	10.5517	10.3644	10.1378	10.4164	10.472	9.93031	9.76971	10.0789	9.85837	10.0352	9.88845	9.71135	10.068	10.0896	10.111	10.2493	10.0999
Pdgfb	platelet derived growth factor, B polypeptide	15	79826330	79845238	-	ENSMUSG00000000489	2.68274	0.488114	0.117896	0.493234	0.140408	-0.0286309	0.0127948		9.07631	8.9602	8.89924	8.70137	8.94054	8.75936	8.57763	8.94251	8.47413	8.33132	8.21258	8.40182	9.1287	9.11726	9.03443	8.56691	9.08711	9.04087	8.26343	8.49122	8.49539	8.36298	8.49405	8.67459
Rpl3	ribosomal protein L3	15	79908211	79913836	-	ENSMUSG00000060036	0.00139802	2.14032	0.970564	0.159819	0.189911	-0.0168041	-0.00629388	0.883815	13.1001	13.0438	13.043	13.0233	12.9375	12.9687	13.3291	13.4135	13.291	13.4564	13.296	13.3345	12.9265	12.9348	13.079	12.9514	12.9956	12.8758	12.9675	13.1681	13.2253	13.2665	13.3443	13.2593
Syngr1	synaptogyrin 1	15	79921764	79949931	+	ENSMUSG00000022415	4.08869	3.71797	0.057481	0.0689095	0.233611	-0.00289561	-0.0065239	0.236048	13.9035	13.9719	14.0112	13.9336	13.9256	13.8769	13.9309	14.0353	13.895	13.7814	13.8365	13.9056	13.8417	13.8339	13.9378	13.8375	13.9234	13.7895	13.7273	13.9647	14.048	13.9462	13.8565	13.974
Tab1	TGF-beta activated kinase 1/MAP3K7 binding protein 1	15	79963584	79992131	+	ENSMUSG00000022414	1.24059	3.93385	0.279249	0.0619654	0.376429	-0.0200361	-0.0140698	0.220058	8.91341	9.10088	9.0884	8.93057	9.05383	9.03702	9.47454	9.59991	9.34993	9.56745	9.31211	9.49461	8.80058	8.86907	9.0517	8.85837	9.03895	8.73203	8.98207	9.26801	9.60479	9.51469	9.50927	9.4409
Mgat3	mannoside acetylglucosaminyltransferase 3	15	80004151	80045949	+	ENSMUSG00000042428	5.64485	3.78493	0.0281812	0.0666639	0.203265	-0.00499282	0.00121863	0.230749	12.1757	12.2238	12.258	12.2398	12.2387	12.1791	12.4481	12.4679	12.4351	12.3253	12.3992	12.3888	12.1736	12.2574	12.2711	12.281	12.203	12.2872	12.2795	12.4089	12.4761	12.3749	12.3472	12.4444
Smcr7l	Smith-Magenis syndrome chromosome region, candidate 7-like (human)	15	80064510	80083796	+	ENSMUSG00000022412	0.178746	0.242805	0.6772	0.627834	0.800796	-0.000118052	0.00835138		9.55205	9.30757	9.50953	9.41425	9.44328	9.42832	9.43847	9.52748	9.43224	9.31004	9.42203	9.51341	9.55374	9.61683	9.43549	9.38957	9.45211	9.46434	9.37134	9.54913	9.47437	9.63278	9.46312	9.47132
Atf4	activating transcription factor 4	15	80085614	80087970	+	ENSMUSG00000042406	0.641617	115.755	0.433029	1.6e-09	0.651276	-0.0334177	-0.0307704	4.92221e-07	11.6806	11.6005	11.6667	11.607	11.6747	11.7219	11.7812	11.7801	11.7451	11.8361	11.7412	11.8511	11.2969	11.2565	11.319	11.2961	11.3389	11.284	11.2843	11.3971	11.4452	11.4755	11.4097	11.4763
Rps19bp1	ribosomal protein S19 binding protein 1	15	80091044	80094736	-	ENSMUSG00000051518	1.4738	0.0869168	0.239622	0.771331	0.884702	0.00601776	0.0132639		8.42799	8.12536	8.24467	8.27032	8.23042	8.3199	8.08306	8.09803	8.24281	8.08867	7.96746	8.17858	8.40608	8.25928	8.46158	8.15187	8.5973	8.2041	7.87155	8.32989	8.36944	8.29753	8.1501	8.23464
Cacna1i	calcium channel, voltage-dependent, alpha 1I subunit	15	80117668	80228709	+	ENSMUSG00000022416	2.35996	20.1922	0.140971	0.00024879	0.784228	-0.0169633	-0.0272023	0.00585987	12.2813	12.3045	12.476	12.3691	12.4568	12.4348	10.8921	10.9285	10.7735	10.6796	11.1915	11.1473	12.0485	12.0275	11.9777	11.9192	12.0944	12.0903	10.5106	10.8013	10.7293	10.7408	10.8843	10.8206
Fam83f	family with sequence similarity 83, member F	15	80502277	80530855	+	ENSMUSG00000022408	0.269768	0.454918	0.609485	0.508133	0.896392	-0.016953	-0.0470088		4.49135	3.88435	4.20575	4.16341	3.46887	4.09985	5.34414	5.58496	5.06717	5.78801	4.99018	5.28634	3.72085	3.84424	4.42492	2.82275	3.77968	4.26326	5.38428	4.9969	5.34391	5.76633	5.21519	5.3483
Tnrc6b	trinucleotide repeat containing 6b	15	80590016	80771516	+	ENSMUSG00000047888	3.94949	1.17974	0.0614948	0.290998	0.167673	-0.00680043	0.00899416	0.982956	11.3043	11.2976	11.5339	11.3653	11.553	11.3417	11.4845	11.4476	11.4988	10.9511	11.539	11.3917	11.5491	11.4116	11.4821	11.404	11.4221	11.6296	11.1591	11.5029	11.5349	11.5825	11.5613	11.598
Adsl	adenylosuccinate lyase	15	80778920	80801377	+	ENSMUSG00000022407	0.0512575	1.40358	0.823307	0.250734	0.0632015	-0.0195134	-0.00876895	0.963654	8.93843	8.8966	8.92	8.83365	8.86118	8.87882	9.1375	9.27845	9.1053	9.12742	9.14331	9.15483	8.83128	8.79326	8.89588	8.86714	8.93753	8.7133	8.82959	9.11664	9.03799	9.16033	9.18301	9.15253
Sgsm3	small G protein signaling modulator 3	15	80808195	80842719	+	ENSMUSG00000042303	7.72756	4.1666	0.0119358	0.0553665	0.605269	-0.00156271	0.00824137	0.205977	10.3816	10.491	10.4631	10.4686	10.535	10.5215	10.1994	10.3376	10.1348	10.0452	10.1996	10.2462	10.5058	10.5088	10.5794	10.3819	10.5117	10.4907	10.0748	10.2752	10.274	10.1852	10.2363	10.2494
Mkl1	MKL (megakaryoblastic leukemia)/myocardin-like 1	15	80842711	81021187	-	ENSMUSG00000042292	4.10105	0.422437	0.0571394	0.523505	0.72922	-0.000761753	0.0263973		10.044	10.0706	9.96064	10.0233	10.0669	10.1601	9.45662	9.633	9.36572	9.34334	9.5345	9.46595	10.2838	10.2423	10.3431	10.0145	10.2587	10.2389	9.22438	9.57259	9.63669	9.43115	9.64146	9.58236
Mchr1	melanin-concentrating hormone receptor 1	15	81065929	81069393	+	ENSMUSG00000050164	1.39435	2.36063	0.252243	0.140918	0.291257	0.00596426	0.00637379	0.356464	8.79969	8.69171	8.79447	8.72506	8.96472	8.56523	7.23272	7.16993	6.94631	7.3131	7.27558	7.01013	8.85014	8.6401	8.96317	8.94791	9.02761	8.82223	7.24935	7.16683	7.06011	7.05264	7.80016	7.44346
Slc25a17	solute carrier family 25 (mitochondrial carrier, peroxisomal membrane protein), member 17	15	81149351	81191195	-	ENSMUSG00000022404	0.0251714	0.101685	0.875615	0.753296	0.045166	-0.0121373	-0.00671348		9.29225	9.31367	9.40051	9.33948	9.13775	9.24033	9.57556	9.71081	9.58849	9.55974	9.50325	9.56837	9.13487	9.31817	9.36537	9.39564	9.26188	9.32319	9.52529	9.50835	9.49075	9.606	9.57275	9.44601
St13	suppression of tumorigenicity 13	15	81194099	81230507	-	ENSMUSG00000022403	0.544338	9.8263	0.469655	0.00545599	0.488889	-0.0141024	-0.0101025	0.0490657	11.7238	11.7502	11.836	11.8183	11.7239	11.7889	11.7965	11.7398	11.9243	11.9826	11.859	12.0274	11.6639	11.6729	11.6165	11.7926	11.576	11.7677	11.518	11.6877	11.7548	11.6691	11.5696	11.6482
Xpnpep3	X-prolyl aminopeptidase (aminopeptidase P) 3, putative	15	81230568	81287237	+	ENSMUSG00000022401	0.580404	2.94385	0.455507	0.102467	0.496124	-0.0162687	-0.00487643	0.298844	8.72497	8.49638	8.86039	8.85528	8.83955	8.77997	8.33436	8.18488	8.3259	8.08867	8.28174	8.34523	8.61015	8.70774	8.63667	8.69558	8.68657	8.64573	8.00319	8.13567	8.30209	8.30965	8.42694	8.26969
Rbx1	ring-box 1	15	81296746	81306799	+	ENSMUSG00000022400	1.19678	1.21437	0.287641	0.284233	0.993034	0.0033743	9.19149e-06	0.979018	10.66	10.7069	10.7498	10.8227	10.7192	10.8091	10.8273	10.8842	10.8419	10.9841	10.804	10.826	10.694	10.6415	10.7814	10.7127	10.7466	10.7938	10.7469	10.9066	11.0098	10.8753	11.0019	10.9477
Ep300	E1A binding protein p300	15	81416644	81482507	+	ENSMUSG00000055024	4.50965	2.55011	0.0470582	0.126785	0.486433	-0.0106135	0.0101762	0.338006	10.8345	10.8385	10.9362	10.8062	10.9865	10.906	10.966	10.9307	10.8946	10.5954	11.0042	10.8749	10.9885	10.9849	10.9677	10.8239	10.8735	11.0239	10.5238	10.9812	10.9383	10.9421	10.9527	10.9505
L3mbtl2	l(3)mbt-like 2 (Drosophila)	15	81494319	81518745	+	ENSMUSG00000022394	1.58486	0.808917	0.223311	0.379698	0.00459521	-0.0132146	-0.00453045		9.84485	9.97557	9.94156	9.82412	9.80274	9.79991	9.71713	9.89633	9.77354	9.64239	9.76385	9.74569	9.87461	9.80102	9.95152	9.79769	10.1925	9.95174	9.47725	9.82012	9.7013	9.84107	9.95725	9.8767
Chadl	chondroadherin-like	15	81508726	81527717	-	ENSMUSG00000063765	0.0314564	0.700288	0.861103	0.413089	0.130538	-0.0299216	-0.0325511		8.06757	8.12571	7.76303	7.66617	8.07383	7.64211	8.58318	8.76155	8.55902	8.46926	8.80827	8.61281	7.75991	7.61683	7.79976	7.72983	7.83279	7.55405	8.13289	8.46112	8.53466	8.68081	8.73924	8.53008
Rangap1	RAN GTPase activating protein 1	15	81534678	81560349	-	ENSMUSG00000022391	7.22877	0.0539623	0.0145412	0.818791	0.795933	0.00806418	0.00841811		12.2328	12.2443	12.2992	12.2357	12.2379	12.3383	12.4793	12.5442	12.4632	12.3934	12.3616	12.5531	12.3225	12.3227	12.4407	12.254	12.3774	12.2552	12.5136	12.5697	12.7057	12.6243	12.6567	12.646
Zc3h7b	zinc finger CCCH type containing 7B	15	81575278	81626699	+	ENSMUSG00000022390	3.28363	7.80048	0.0858097	0.0116008	0.386402	-0.00935428	-0.00739588	0.0786783	12.5279	12.4274	12.4984	12.4759	12.5153	12.4816	12.3279	12.4059	12.337	12.1673	12.3477	12.3317	12.3984	12.3388	12.4394	12.3274	12.3988	12.317	12.0582	12.3129	12.3529	12.3025	12.3055	12.3727
Gm17597	predicted gene, 17597	15	81631221	81633043	-	ENSMUSG00000091934	0.122054	0.802822	0.73066	0.381463	0.439216	-0.262983	-0.318802		3.95078	4.12536	2.79072	4.04793	3.46887	3.44777	4.13469	4.16993	3.42974	4.33735	2.40522	4.48987	3.06878	1.67432	2.65939	2.82275	3.26511	1.45591	0.977463	3.9969	3.67405	3.40878	4.03462	4.11126
Tef	thyrotroph embryonic factor	15	81632851	81657291	+	ENSMUSG00000022389	0.176324	1.22523	0.679262	0.282155	0.00087814	-0.0165027	-0.00835426	0.97727	13.1127	13.1033	13.2226	13.1499	13.1353	13.0122	12.5771	12.6872	12.6049	12.4823	12.5581	12.4578	13.0854	12.9577	13.066	13.0702	13.1958	13.1426	12.3516	12.4468	12.4458	12.4863	12.7228	12.6088
Tob2	transducer of ERBB2, 2	15	81678700	81688756	-	ENSMUSG00000048546	0.34638	2.54744	0.563102	0.126972	0.161111	-0.0318424	-0.00329984	0.338205	9.42634	9.30973	9.32586	9.24104	9.5508	9.42894	9.76374	9.48892	9.64695	9.54919	9.85352	9.7256	9.21884	9.32942	9.42107	9.44298	9.42296	9.3218	8.93448	9.51624	9.52866	9.73768	9.82284	9.75821
Phf5a	PHD finger protein 5A	15	81695749	81702341	-	ENSMUSG00000061360	0.540987	31.357	0.471007	2.12e-05	0.073398	-0.0590821	-0.0737453	0.000952871	8.53027	8.59485	8.75265	8.53443	8.57739	8.55331	8.83166	8.84235	8.9287	9.08509	8.96746	8.96986	7.9409	8.08371	7.94479	8.18732	8.2843	8.12834	8.00319	8.49122	8.53655	8.62795	8.44966	8.67023
Aco2	aconitase 2, mitochondrial	15	81702739	81745563	+	ENSMUSG00000022477	0.446588	0.131103	0.511997	0.721287	0.559835	-0.00320371	0.0097423		13.538	13.5116	13.5111	13.5002	13.5139	13.5052	13.8465	13.8933	13.7454	13.7739	13.7639	13.8129	13.6592	13.608	13.6885	13.6038	13.6804	13.5377	13.5606	13.8696	13.922	13.8696	13.8512	13.8346
Polr3h	polymerase (RNA) III (DNA directed) polypeptide H	15	81745460	81756643	-	ENSMUSG00000022476	3.39586	8.97668	0.08102	0.00742538	0.272967	0.00415495	0.00673763	0.059247	9.73928	9.56703	9.50725	9.68697	9.48289	9.48904	9.59002	9.77479	9.64568	9.6949	9.60979	9.59729	9.72903	9.59913	9.67953	9.66573	9.79983	9.5592	9.61035	9.79232	9.72835	9.82029	9.80545	9.68112
Csdc2	cold shock domain containing C2, RNA binding	15	81767189	81781371	+	ENSMUSG00000042109	1.12344	4.65138	0.302468	0.0440499	0.787715	-0.0124031	-0.00831873	0.178601	11.3884	11.3288	11.3807	11.3387	11.3338	11.5458	12.5116	12.6362	12.4266	12.3482	12.3367	12.5397	11.2558	11.2807	11.2778	11.2912	11.3473	11.0898	12.2049	12.4118	12.4916	12.4325	12.2876	12.3801
Pmm1	phosphomannomutase 1	15	81781538	81791360	-	ENSMUSG00000022474	0.984548	12.1661	0.333548	0.00246148	0.882716	-0.0306831	-0.00808399	0.0288763	11.3384	11.2491	11.2658	11.2839	11.3727	11.2843	11.4611	11.5421	11.3768	11.4184	11.4136	11.452	11.1171	11.247	11.2155	10.9987	11.1882	11.0502	10.8623	11.1936	11.2692	11.2145	11.1911	11.1774
Xrcc6	X-ray repair complementing defective repair in Chinese hamster cells 6	15	81818265	81870515	+	ENSMUSG00000022471	1.63817	0.195674	0.215984	0.66323	0.927104	-0.0224755	-0.0123626		8.32133	8.37241	8.22757	8.32001	8.4295	8.13619	8.62044	8.73779	8.48029	8.6752	8.76629	8.57501	8.04567	8.38849	8.17906	8.31979	8.37614	8.19062	8.3494	8.47473	8.43365	8.43115	8.35626	8.28422
Desi1	desumoylating isopeptidase 1	15	81822953	81864292	-	ENSMUSG00000022472	1.74292	2.6254	0.202453	0.121645	0.179112	-0.0169412	-0.00747946	0.330123	11.7782	11.715	11.7299	11.7945	11.812	11.7129	12.444	12.394	12.3288	12.6765	12.5429	12.5584	11.646	11.6545	11.6592	11.6945	11.7461	11.5839	12.0518	12.2016	12.2837	12.2496	12.1643	12.1143
Nhp2l1	NHP2 non-histone chromosome protein 2-like 1 (S. cerevisiae)	15	81871749	81878028	-	ENSMUSG00000063480	0.232863	3.46688	0.634922	0.0781502	0.34615	-0.0197377	0.000655392	0.254902	10.9333	10.9057	10.9217	10.9934	11.008	10.988	10.8618	10.7985	10.841	10.8789	10.7813	10.9302	10.9026	10.9409	10.9386	11.0129	10.9385	11.0057	10.5825	10.6617	10.6155	10.7685	10.7415	10.7776
Mei1	meiosis defective 1	15	81900547	81957244	+	ENSMUSG00000068117	1.0627	1.00308	0.315546	0.329152	0.626183	0.299842	-0.127843		7.14956	6.81724	7.19444	6.9387	6.73565	6.84987	3.13469	3.16993	2.25981	3.23781	2.72715	3.24194	6.1194	6.16617	6.17035	6.67075	6.52384	6.43319	3.57693	3.7559	3.79959	3.99374	4.03462	3.11126
Ccdc134	coiled-coil domain containing 134	15	81958352	81972630	+	ENSMUSG00000068114	2.31093	0.203106	0.144935	0.657326	0.472011	-0.0279489	-0.0475069		7.43386	7.17981	7.15995	7.32095	7.46887	7.28427	8.34901	8.60733	8.42974	8.5494	8.31811	8.29179	7.16831	6.82406	6.74685	6.92709	7.18567	6.70384	8.03636	8.25066	8.38955	8.50154	8.43607	8.3646
Srebf2	sterol regulatory element binding factor 2	15	81977699	82035390	+	ENSMUSG00000022463	2.98474	6.6789	0.100273	0.0181816	0.726472	-0.0113781	-0.00979787	0.1035	12.1695	12.2331	12.2634	12.153	12.269	12.2784	12.2867	12.2963	12.0974	11.9677	12.2266	12.2795	12.1244	12.0569	12.1254	11.8851	12.0595	11.9493	11.8349	12.2525	12.1757	12.1737	12.2724	12.2762
Cenpm	centromere protein M	15	82064209	82075177	-	ENSMUSG00000068101	0.177055	0.716056	0.678638	0.407972	0.915982	-0.00327525	0.0311161		5.13521	5.06878	4.72932	5.04793	5.55633	4.64042	4.38262	4.16993	4.42974	3.88989	3.72715	4.24194	5.1194	5.48167	4.79689	4.58829	5.31573	4.91534	4.03636	4.88143	4.02198	4.31567	4.44966	3.76334
1500009C09Rik	RIKEN cDNA 1500009C09 gene	15	82082827	82091183	+	ENSMUSG00000068099	0.833629	6.21843	0.372666	0.022032	0.218886	-0.0104873	-0.00296539	0.117031	10.7154	10.54	10.6946	10.7576	10.6771	10.6544	11.3868	11.5043	11.4814	11.5259	11.3811	11.4762	10.6057	10.537	10.7125	10.4637	10.5346	10.5852	11.2244	11.3436	11.444	11.3753	11.3354	11.2566
2013-09-03	septin 3	15	82105365	82124872	+	ENSMUSG00000022456	6.3365	18.8357	0.0209636	0.00035273	0.119766	-0.0180892	-0.00955153	0.00755807	13.5234	13.5658	13.6442	13.5664	13.5598	13.5981	13.2905	13.3092	13.2968	13.0454	13.2035	13.2463	13.4446	13.4001	13.4995	13.4354	13.4711	13.4125	12.8533	13.1682	13.1533	13.128	13.0819	13.1396
Naga	N-acetyl galactosaminidase, alpha	15	82159962	82169256	-	ENSMUSG00000022453	0.23212	1.96751	0.635459	0.176842	0.2752	-0.035701	-0.0144525	0.90049	8.43386	8.19311	8.21138	8.17032	8.14835	8.01546	8.74202	8.93958	8.55443	8.71586	8.60979	8.84927	7.98252	8.18211	8.31474	8.13018	8.07246	8.0028	8.12382	8.57723	8.59833	8.61335	8.64343	8.63034
Fam109b	family with sequence similarity 109, member B	15	82169372	82176173	+	ENSMUSG00000049687	0.829791	7.82379	0.373746	0.0114959	0.772904	-0.240245	-0.132424	0.0782107	3.66127	3.88435	4.01311	3.78489	3.79079	3.44777	3.45662	3.32193	3.06717	3.88989	3.99018	3.70138	2.84639	3.67432	3.50738	3.82275	3.45775	3.77784	2.16189	2.29646	3.02198	1.40878	2.93509	2.62583
1500032L24Rik	RIKEN cDNA 1500032L24 gene	15	82169389	82179521	+	ENSMUSG00000022452	0.0531671	9.74951	0.820106	0.00560756	0.75824	0.0179061	0.0402543	0.0498479	10.2971	10.1731	10.138	10.2427	10.1342	10.1403	10.5292	10.6653	10.4778	10.6314	10.5801	10.6481	10.5595	10.5902	10.6906	10.5162	10.578	10.5247	10.5797	10.762	10.8976	10.8086	10.8403	10.751
Ndufa6	NADH dehydrogenase (ubiquinone) 1 alpha subcomplex, 6 (B14)	15	82180569	82184721	-	ENSMUSG00000022450	0.00030301	0.593495	0.986293	0.450544	0.317491	-0.0162506	-0.00556442		10.0479	10.0885	10.1186	9.99044	10.0946	9.93504	10.322	10.4378	10.2987	10.4248	10.2787	10.3828	10.0911	9.90313	10.0923	10.1082	10.1942	9.93973	9.99478	10.2049	10.3542	10.3021	10.2506	10.1804
Cyp2d22	cytochrome P450, family 2, subfamily d, polypeptide 22	15	82200958	82210690	-	ENSMUSG00000061740	0.0111258	11.8315	0.917102	0.00274632	0.0443911	-0.0910995	-0.0367662	0.0310668	9.0574	9.13228	8.94046	8.99824	8.99243	9.02844	9.25881	9.35094	9.31781	8.99651	9.16677	9.25037	8.57884	8.82406	8.72978	8.77229	8.96158	8.68473	8.45344	8.51563	8.4143	8.67088	8.83163	8.57069
Tcf20	transcription factor 20	15	82639059	82742564	-	ENSMUSG00000041852	0.520413	3.30751	0.479449	0.0847636	0.228062	-0.0276051	-0.000885257	0.267385	11.1424	11.2515	11.2752	11.2663	11.3081	11.359	11.2491	11.224	11.2946	11.1257	11.1643	11.0589	11.281	11.2086	11.1496	11.2364	11.0844	11.1624	10.6763	11.0704	11.0888	11.1827	11.1529	11.216
AW121686	expressed sequence AW121686	15	82813300	82819564	+	ENSMUSG00000090940	0.463891	0.915317	0.504028	0.350723	0.707193	0.347065	0.14372		0.491349	2.42492	2.20575	3.04793	2.79079	1.64042	2.45662	3.45943	1.84478	3.43046	3.57515	2.56387	2.26142	1.67432	1.92242	2.82275	3.04272	3.04087	2.89885	3.7559	3.79959	3.21614	3.71269	3.47383
Nfam1	Nfat activating molecule with ITAM motif 1	15	82828151	82863736	-	ENSMUSG00000058099	8.23e-05	2.46586	0.992856	0.132848	0.262785	-0.060207	0.0331109	0.345884	5.57881	5.51238	5.76034	5.63289	6.42306	6.22538	7.7494	7.97154	7.80671	7.77031	8.33596	7.98341	5.87613	5.8036	5.72978	5.92709	6.04272	5.66536	7.05266	7.65402	7.40445	7.71256	7.31756	7.26969
Serhl	serine hydrolase-like	15	82919936	82947104	+	ENSMUSG00000058586	1.06885	0.907477	0.314186	0.352747	0.825343	0.0357606	-0.0231999		7.28745	6.84968	6.80641	6.72788	6.97094	6.47861	6.705	6.72942	6.61684	6.82466	7.08287	7.20819	6.72446	7.01861	6.71458	6.64731	7.15319	6.60159	6.99106	6.68034	7.0969	7.22295	6.9801	6.6482
Rrp7a	ribosomal RNA processing 7 homolog A (S. cerevisiae)	15	82943863	82953231	-	ENSMUSG00000018040	0.189288	0.577448	0.668412	0.456641	0.744583	-0.00335143	0.00245396		10.9871	10.8887	10.886	10.9847	10.959	11.0707	10.9508	11.0524	10.8616	10.9241	10.8602	10.9673	10.9345	10.862	11.0457	10.9019	10.9052	10.8939	10.8505	10.9207	10.9836	10.9552	11.0259	10.9403
Poldip3	polymerase (DNA-directed), delta interacting protein 3	15	82956408	82979814	-	ENSMUSG00000041815	0.223834	0.160711	0.641524	0.692976	0.291545	-0.00739032	0.00233999		10.3083	10.3453	10.3606	10.3241	10.3922	10.2825	10.412	10.4189	10.338	10.3671	10.2771	10.4281	10.3436	10.3236	10.4196	10.3066	10.409	10.2697	10.1083	10.4257	10.4044	10.4923	10.5136	10.3821
Cyb5r3	cytochrome b5 reductase 3	15	82983924	83003022	-	ENSMUSG00000018042	0.0555573	0.00167895	0.816183	0.967743	0.0277521	-0.00254286	-0.00810643		10.1189	10.0903	10.0544	9.89342	9.97269	9.91188	10.1557	10.332	10.11	10.2003	10.2397	10.2419	9.95317	9.99624	10.0688	10.0592	10.2309	9.95176	10.118	10.2302	10.1717	10.2081	10.3384	10.3263
A4galt	alpha 1,4-galactosyltransferase	15	83057156	83082204	-	ENSMUSG00000047878	0.707177	3.55661	0.410841	0.0746918	0.160509	-0.0999562	-0.119372	0.247863	5.01491	5.37912	4.59807	4.98653	4.05383	5.09985	5.22215	5.70044	5.61737	5.18534	4.79754	5.7338	4.16831	4.37476	4.65939	4.30818	4.98132	4.3628	4.82485	4.94032	5.12151	5.36298	4.93509	4.88887
Arfgap3	ADP-ribosylation factor GTPase activating protein 3	15	83130170	83180677	-	ENSMUSG00000054277	0.00730636	0.0709635	0.932776	0.792809	0.1966	-0.0302626	0.0151436		9.07255	8.69171	8.77181	8.85098	8.61861	8.65723	8.99267	9.11114	8.93929	9.03408	8.84401	8.96304	8.92676	8.9872	9.02396	9.0322	8.93753	8.87376	8.43491	8.88518	8.90462	8.87639	8.94151	9.00087
1700001L05Rik	RIKEN cDNA 1700001L05 gene	15	83187990	83197707	-	ENSMUSG00000075511	3.02847	8.04181	0.0979873	0.0105651	0.143018	-0.0195497	0.0287063	0.0736263	6.27271	6.09735	5.59807	6.27032	5.46887	5.22538	4.77855	4.80735	4.90367	4.43046	4.21258	4.56387	6.01631	6.40224	6.06538	6.58829	6.04272	5.5003	4.82485	4.9969	4.38455	4.57871	5.03462	4.82747
Pacsin2	protein kinase C and casein kinase substrate in neurons 2	15	83206037	83295036	-	ENSMUSG00000016664	0.486449	1.05087	0.493963	0.318182	0.063899	0.000975671	0.00536078		10.6411	10.5835	10.6341	10.7262	10.6783	10.7132	11.4032	11.4014	11.2542	11.3031	11.3463	11.5157	10.7075	10.6785	10.6435	10.5602	10.5465	10.5539	11.1916	11.3866	11.5138	11.3996	11.3249	11.3415
Ttll1	tubulin tyrosine ligase-like 1	15	83314202	83341323	-	ENSMUSG00000022442	0.0208096	0.299693	0.886818	0.590448	0.387528	9.34712e-05	-0.000941256		9.86204	9.77365	9.8223	9.80059	9.70488	9.77484	9.97232	9.98726	9.856	9.93825	9.78892	9.77722	9.78694	9.85671	9.78661	9.71271	9.82189	9.6678	9.71392	10.0713	10.0332	9.98243	9.9981	9.9781
Mcat	malonyl CoA:ACP acyltransferase (mitochondrial)	15	83377227	83386141	-	ENSMUSG00000048755	0.287431	0.742458	0.598093	0.399619	0.625505	-0.0136198	0.00109855		8.12071	8.11142	8.04496	8.14947	8.28265	8.04981	7.92911	8.21917	7.98773	8.10994	7.88095	7.9493	7.9409	8.01417	8.34869	8.08578	8.07246	8.25033	7.96063	7.78028	8.06637	8.01611	8.04062	7.95496
Tspo	translocator protein	15	83394003	83404631	+	ENSMUSG00000041736	0.00455268	2.74507	0.94691	0.113976	0.944098	-0.0141076	-0.129406	0.317885	5.73928	5.67285	4.84961	5.27032	5.67832	5.09985	5.34414	5.85798	5.34728	5.38465	5.65315	6.09992	4.65374	4.84424	4.65939	4.67075	5.31573	4.91534	5.16189	5.65402	5.50003	5.40878	5.03462	5.39137
Ttll12	tubulin tyrosine ligase-like family, member 12	15	83405549	83425587	-	ENSMUSG00000016757	0.126054	0.446083	0.72647	0.512233	0.684741	-0.0210116	0.00944421		8.41616	8.43055	8.46785	8.47419	8.62368	8.41521	8.40148	8.50779	8.29873	8.08867	8.48204	8.53196	8.66656	8.43587	8.4512	8.34631	8.46898	8.42745	8.07677	8.4154	8.18617	8.35715	8.65521	8.37537
Scube1	signal peptide, CUB domain, EGF-like 1	15	83435429	83555451	-	ENSMUSG00000016763	0.779478	3.36129	0.388335	0.0824615	0.524007	-0.0187191	0.000114118	0.263184	11.4236	11.4043	11.4322	11.4091	11.6046	11.5337	10.1389	10.8242	10.7902	10.422	11.2779	10.7994	11.3778	11.4233	11.4629	11.3526	11.5205	11.4907	10.0506	10.7528	10.3555	10.7408	10.3114	10.2391
Mpped1	metallophosphoesterase domain containing 1	15	83609897	83688924	+	ENSMUSG00000041708	0.734802	0.0501735	0.402014	0.825153	0.806381	0.020455	-0.0120508		12.4357	12.3975	12.4952	12.3774	12.4444	12.4929	7.80711	7.92481	7.62614	8.19201	8.219	7.9493	12.2618	12.2456	12.3712	12.2279	12.3438	12.2319	8.00319	7.90379	7.92887	8.05264	8.61958	7.99739
Efcab6	EF-hand calcium binding domain 6	15	83697142	83895809	-	ENSMUSG00000022441	2.57613	3.22209	0.12498	0.088576	0.162665	0.0281625	0.0349792	0.274454	7.04594	7.52295	7.72145	7.59225	7.48009	7.35466	2.94204	4.32193	4.06717	4.75238	4.21258	4.41187	7.69605	7.4292	7.94479	7.43156	7.46898	7.68473	3.74685	3.88143	4.02198	3.40878	4.21519	4.2108
Sult4a1	sulfotransferase family 4A, member 1	15	83906527	83936184	-	ENSMUSG00000018865	4.23285	0.910132	0.0536386	0.35206	0.312322	-0.00133248	0.00227742		13.5561	13.5709	13.5164	13.489	13.5393	13.5054	13.3743	13.4956	13.3639	13.2516	13.2425	13.3688	13.5845	13.5272	13.6242	13.4768	13.6537	13.5027	13.1663	13.4506	13.5632	13.4008	13.3882	13.4261
Pnpla3	patatin-like phospholipase domain containing 3	15	83998246	84019942	+	ENSMUSG00000041653	0.241733	0.109129	0.628589	0.744753	0.0766622	-0.0322635	-0.00269525		8.10606	7.97182	8.23366	7.97867	8.55633	7.98027	8.70074	8.82972	8.55443	7.9927	8.57515	8.24194	7.87613	8.12553	8.24435	8.03998	8.38257	8.06324	8.28428	8.51078	8.44824	8.7751	8.76073	8.45365
Samm50	sorting and assembly machinery component 50 homolog (S. cerevisiae)	15	84022663	84044733	+	ENSMUSG00000022437	0.909308	0.362494	0.352273	0.554242	0.833304	0.00350823	0.0113373		10.447	10.4136	10.3618	10.4069	10.3408	10.3356	10.7121	10.7797	10.6692	10.7636	10.5975	10.8089	10.4974	10.537	10.542	10.4256	10.5049	10.4741	10.6048	10.7953	10.8737	10.8192	10.7146	10.8604
Parvb	parvin, beta	15	84062473	84146118	+	ENSMUSG00000022438	0.00287107	0.0135492	0.957827	0.908556	0.504027	-0.00225263	0.00777804		8.9912	8.88845	8.89575	8.95882	8.89093	9.00236	10.6064	10.567	10.503	10.5623	10.528	10.4993	8.93738	9.07946	8.96682	8.84955	9.10521	8.76425	10.4051	10.6059	10.594	10.5238	10.4919	10.5601
Parvg	parvin, gamma	15	84154456	84173372	+	ENSMUSG00000022439	1.67446	2.23556	0.211171	0.151293	0.540225	0.0529488	0.0420394	0.369883	6.77675	6.78247	7.01311	6.74837	6.44615	6.34086	5.77855	6.24793	5.96025	6.10288	5.44961	6.0493	7.04278	7.15005	7.24435	6.78622	7.22594	6.9637	6.40982	6.2272	6.30209	6.02349	6.21519	6.3483
1810041L15Rik	RIKEN cDNA 1810041L15 gene	15	84209635	84277527	-	ENSMUSG00000062760	13.1284	1.22115	0.00180983	0.282934	0.517348	0.00131921	0.0172648	0.977598	9.75579	9.8258	10.0684	9.60507	9.71679	9.52611	13.3554	13.3689	13.3692	13.0657	13.2585	13.27	9.93562	9.98493	10.2413	9.60148	9.91102	9.8266	13.1694	13.49	13.487	13.4245	13.2426	13.3841
D15Mit107	marker	15	84216927	84217076	marker	marker	marker	marker	marker	marker	marker	marker	marker	marker
Ldoc1l	leucine zipper, down-regulated in cancer 1-like	15	84383828	84387922	-	ENSMUSG00000055745	4.66268	20.717	0.0438198	0.00021811	0.416914	-0.0186524	-0.00586992	0.0053791	10.6038	10.5898	10.6723	10.6966	10.7263	10.6263	10.7225	10.8549	10.7069	10.5928	10.7079	10.8222	10.5341	10.5524	10.5925	10.4536	10.4704	10.4346	10.4672	10.5761	10.6388	10.5186	10.6055	10.6315
Prr5	proline rich 5 (renal)	15	84500050	84534103	+	ENSMUSG00000036106	1.79411	8.63897	0.19623	0.00841981	0.882593	-0.0990535	-0.0275402	0.0643429	6.34933	6.65374	6.20575	6.34561	6.75427	6.54731	7.30461	7.43463	7.28218	7.03037	7.42759	7.37123	6.60127	5.95972	6.11882	5.20126	5.94961	6.2108	6.50766	6.85105	6.48141	6.57871	6.9981	7.58003
Phf21b	PHD finger protein 21B	15	84615811	84686479	-	ENSMUSG00000016624	0.742539	0.00014218	0.399594	0.990611	0.53452	8.87465e-07	0.050605		8.17083	7.64409	8.19444	7.60252	8.18996	8.44777	7.98018	8.16491	7.82206	7.77031	8.01255	8.11231	8.43635	8.60505	8.18295	8.01652	8.42354	8.0028	7.96924	7.97594	8.02198	8.08826	8.09351	7.99041
Nup50	nucleoporin 50	15	84753858	84773393	+	ENSMUSG00000016619	1.96226	0.886254	0.177393	0.358311	0.319647	-0.0115883	0.00885438		10.0149	9.99667	10.0386	9.92649	10.0743	9.90251	10.4453	10.4471	10.4496	10.4149	10.429	10.3648	10.0411	10.1255	10.1496	9.95615	10.1266	10.054	10.0867	10.4475	10.4446	10.46	10.4212	10.4676
5031439G07Rik	RIKEN cDNA 5031439G07 gene	15	84774366	84818981	-	ENSMUSG00000036046	0.0209005	0.154971	0.886573	0.698212	0.660181	-0.0179871	0.01069		11.722	11.5606	11.659	11.5101	11.8104	11.5375	12.7482	12.7742	12.5553	12.5367	12.7935	12.7308	11.8469	11.7558	11.7125	11.5507	11.7495	11.6145	12.2937	12.5589	12.5402	12.6552	12.7253	12.6196
Fam118a	family with sequence similarity 118, member A	15	84867492	84893258	+	ENSMUSG00000022434	5.6895	38.0676	0.0276382	6.27e-06	0.786208	0.0358811	0.0709739	0.000377991	8.32424	8.09026	8.13057	8.37585	8.41138	8.20266	8.81768	8.52748	8.66069	8.72966	8.62439	8.72576	8.9232	8.78806	8.57586	8.8046	8.92536	8.90712	9.02401	8.97242	8.94254	9.04541	8.95428	8.94776
Fbln1	fibulin 1	15	85036379	85116965	+	ENSMUSG00000006369	1.18382	6.62211	0.29019	0.0186127	0.997162	-0.0500195	-0.0542965	0.104961	7.32424	6.46932	6.79072	6.48533	7.11272	6.88835	9.2406	9.26444	8.90727	8.77918	8.83985	9.44651	6.2387	6.60505	6.62286	6.28218	6.13018	6.04087	8.59929	8.73941	8.70246	8.50154	8.98882	9.11448
Atxn10	ataxin 10	15	85166811	85294266	+	ENSMUSG00000016541	0.050829	1.98321	0.824034	0.175206	0.0604493	-0.0174376	-0.00812812	0.89944	12.0242	12.1031	12.1283	12.0973	11.9968	11.9618	12.474	12.4025	12.413	12.4922	12.317	12.3657	11.9812	11.9747	12.005	12.064	11.971	11.9755	12.0808	12.2561	12.3024	12.3112	12.3305	12.3148
Wnt7b	wingless-related MMTV integration site 7B	15	85365869	85412251	-	ENSMUSG00000022382	0.845958	0.867983	0.369229	0.363202	0.111134	-0.00569817	0.0201152		9.03438	8.84699	8.93707	8.69178	8.60842	8.61196	8.68928	8.80735	8.66496	8.62521	8.52416	8.56387	9.00626	8.96433	9.38731	8.80003	9.20595	8.9637	8.64839	8.59108	8.77304	8.83923	8.72019	8.66585
Ppara	peroxisome proliferator activated receptor alpha	15	85565413	85633249	+	ENSMUSG00000022383	0.1479	2.18295	0.704821	0.155931	0.453607	0.0504973	0.0197774	0.880753	6.04594	5.85119	5.72932	5.82052	5.79079	5.68481	5.80711	5.78136	5.3891	5.23781	5.89707	5.63426	6.28379	5.99624	5.69501	6.14468	5.58704	5.77784	5.74685	5.85105	6.23699	5.49625	5.77159	5.66146
2210021J22Rik	RIKEN cDNA 2210021J22 gene	15	85637402	85642127	-	ENSMUSG00000064284	4.30298	0.105859	0.0518766	0.748465	0.236386	-0.066724	-0.0424119		6.9832	7.17981	6.96064	7.04793	6.96072	6.7697	6.82119	7.03342	6.84478	6.98504	6.99018	6.8713	6.84639	6.6516	6.72978	6.54522	6.93349	6.47828	6.50766	6.44621	6.36437	7.08121	6.84198	6.47383
Pkdrej	polycystic kidney disease (polycystin) and REJ (sperm receptor for egg jelly homolog, sea urchin)	15	85645106	85652163	-	ENSMUSG00000052496	8.13572	53.6839	0.0101904	6.03e-07	0.0755148	-0.354777	-0.271816	5.6548e-05	5.88367	6.12536	6.03864	6.04793	5.89513	6.39531	4.99267	5.45943	5.58174	4.82277	4.86465	5.28634	4.34889	4.13375	4.65939	4.40771	4.36464	4.97947	2.16189	3.88143	4.30209	3.99374	3.93509	4.39137
Ttc38	tetratricopeptide repeat domain 38	15	85662736	85689252	+	ENSMUSG00000035944	1.34e-07	0.417948	0.999711	0.525696	0.132941	-0.0510984	-0.00865349		7.99914	7.69171	7.68149	7.81169	7.78175	7.77997	8.2115	8.20945	8.20818	8.03037	8.03458	7.84927	7.44133	7.81387	7.91489	7.68073	7.96555	7.42169	7.3971	8.04466	7.92887	8.22896	8.06437	8.0521
Gtse1	G two S phase expressed protein 1	15	85690137	85707002	+	ENSMUSG00000022385	0.0133833	0.334832	0.909115	0.569624	0.231618	-0.113578	-0.35054		3.81328	3.59485	3.79072	3.46297	3.27622	3.22538	3.71965	4.64386	3.06717	2.43046	3.57515	3.41187	1.26142	2.67432	3.33746	3.50082	3.77968	0.45591	2.57693	3.7559	3.79959	4.21614	3.58716	4.11126
Trmu	tRNA 5-methylaminomethyl-2-thiouridylate methyltransferase	15	85709742	85727824	+	ENSMUSG00000022386	0.464667	3.98967	0.503676	0.060304	0.299173	-0.0332537	-0.0199983	0.216975	7.89223	7.77365	8.01953	7.96281	7.96072	7.59461	8.10047	8.19476	7.9533	7.78801	8.07056	7.99014	7.70437	7.71871	7.78867	7.61976	7.73388	7.7133	7.84371	7.69734	7.90112	7.80966	7.84883	7.98339
Celsr1	cadherin, EGF LAG seven-pass G-type receptor 1 (flamingo homolog, Drosophila)	15	85729188	85864207	-	ENSMUSG00000016028	0.778131	0.387862	0.388737	0.540829	0.902328	-0.00975898	0.0249917		7.33684	6.97951	6.56331	6.9387	7.05383	6.84987	6.38262	6.26679	6.46927	6.69724	7.01993	6.58179	6.96186	7.24417	7.19544	6.85837	6.98132	6.93164	6.35828	6.25066	6.32315	6.49625	7.56236	6.45365
Gramd4	GRAM domain containing 4	15	85888125	85968064	+	ENSMUSG00000035900	0.017839	2.20911	0.895153	0.153604	0.332616	-0.037487	-0.00234766	0.877035	10.2971	10.0903	10.2892	10.1858	10.3952	10.3581	9.8677	9.7879	9.64783	9.67363	9.68134	9.65769	10.1743	10.2442	10.1861	10.0612	10.2795	10.078	9.20992	9.33538	9.65964	9.76193	9.71457	9.57303
Cerk	ceramide kinase	15	85969558	86016571	-	ENSMUSG00000035891	0.300411	3.32388	0.590007	0.0840548	0.633311	-0.000240982	0.0454133	0.266192	11.128	11.0867	11.0339	11.0357	10.9627	11.0614	11.8451	11.8364	11.7074	11.6484	11.6537	11.7591	11.6013	11.5909	11.5663	11.526	11.5947	11.5703	11.584	11.8706	11.9259	11.8224	11.7122	11.7751
Tbc1d22a	TBC1 domain family, member 22a	15	86044889	86328933	+	ENSMUSG00000051864	0.404801	1.98098	0.532211	0.175437	0.646375	0.0109825	0.0192694	0.899785	9.84008	9.70801	9.66108	9.72035	9.76807	9.73318	9.12053	9.2738	9.04117	9.12394	9.1734	9.27537	9.92142	9.85671	9.99388	9.81597	9.98718	9.94977	9.1122	9.29364	9.33097	9.33656	9.42923	9.33181
Fam19a5	family with sequence similarity 19, member A5	15	87455660	87589794	+	ENSMUSG00000054863	0.480236	0.550413	0.4967	0.467222	0.750777	-0.00570196	0.00403559		11.1316	11.1297	11.0753	11.1327	11.1814	11.1698	11.5992	11.6475	11.5313	11.5305	11.5543	11.5701	11.1356	11.1048	11.2308	11.1044	11.2317	11.022	11.3293	11.6279	11.6224	11.6237	11.5913	11.6281
Brd1	bromodomain containing 1	15	88517730	88564663	-	ENSMUSG00000022387	0.258502	0.560528	0.617004	0.463216	0.100697	-0.00682233	-0.00460251		10.2858	10.3243	10.3182	10.2863	10.3862	10.2347	10.1873	10.2877	10.1577	10.0635	10.1882	10.183	10.2907	10.1762	10.319	10.313	10.3219	10.317	10.0708	10.2419	10.111	10.1299	10.3089	10.1603
Zbed4	zinc finger, BED domain containing 4	15	88582090	88614946	+	ENSMUSG00000034333	0.293664	0.280149	0.594181	0.602733	0.818075	0.00317365	0.00664792		8.60509	8.4022	8.65688	8.80282	8.72625	8.4984	8.29188	8.28642	8.24884	8.11696	8.47131	8.25317	8.66656	8.49092	8.67731	8.71237	8.5076	8.4519	8.14678	8.39139	8.36777	8.42559	8.4085	8.46353
Alg12	asparagine-linked glycosylation 12 (alpha-1,6-mannosyltransferase)	15	88635674	88649748	-	ENSMUSG00000035845	0.00612501	0.851547	0.938438	0.367686	0.990367	-0.0348293	0.016554		7.36171	7.66333	7.36562	7.71089	7.63879	7.71723	7.86261	7.83289	7.56359	7.66886	7.63404	7.74974	7.61898	7.55696	7.58539	7.53425	7.68657	7.56443	7.16189	7.68017	7.60694	7.53807	7.78594	7.56129
Creld2	cysteine-rich with EGF-like domains 2	15	88650076	88657111	+	ENSMUSG00000023272	3.5103	9.62645	0.0764539	0.00586037	0.030573	-0.0222679	0.0107832	0.0508456	7.49135	7.8258	8.08227	7.76675	7.86974	8.37513	7.56932	7.98299	7.96025	7.88989	8.05627	8.3815	8.00289	7.8036	7.84525	7.53425	7.7976	7.77784	7.85305	7.64519	7.49075	7.50681	7.71269	7.51336
Pim3	proviral integration site 3	15	88692624	88696156	+	ENSMUSG00000035828	0.233361	1.06155	0.634563	0.315799	0.501513	-0.0331023	0.0134538	0.999247	9.6487	9.37621	9.42007	9.23775	9.65869	9.34778	9.95646	9.96867	9.85414	10.0192	10.0033	10.2005	9.59234	9.5782	9.65713	9.46082	9.77517	9.7133	9.41928	9.65181	9.72242	9.79249	9.92377	9.83529
Ttll8	tubulin tyrosine ligase-like family, member 8	15	88721063	88784848	-	ENSMUSG00000022388	0.791433	1.28456	0.384793	0.271151	0.445093	0.0374436	0.147744	0.971098	3.49135	3.42492	3.20575	3.46297	4.27622	3.81034	5.17908	5.20945	4.42974	4.88989	4.72715	5.5995	4.58335	2.99624	4.0379	4.20126	3.46853	3.26326	5.10049	5.25066	5.02198	5.05264	5.72228	5.43319
Mlc1	megalencephalic leukoencephalopathy with subcortical cysts 1 homolog (human)	15	88786314	88809437	-	ENSMUSG00000035805	1.26491	0.961945	0.274732	0.339022	0.630355	0.000769141	-0.000649451		12.0266	11.8263	11.8474	11.8882	11.7975	11.8053	12.2939	12.3001	12.2299	12.3828	12.3485	12.4274	11.8812	11.8586	11.9374	11.8894	11.9749	11.8498	12.2185	12.3174	12.3163	12.3666	12.4395	12.3043
Panx2	pannexin 2	15	88890164	88903997	+	ENSMUSG00000058441	4.73012	4.23033	0.0424739	0.0537031	0.932419	0.000338098	-0.00467136	0.202396	11.1699	11.2459	11.3434	11.1617	11.256	11.402	11.9884	12.1128	11.8216	11.7112	11.9071	12.0262	11.2501	11.0634	11.288	10.9897	11.2135	10.9922	11.755	12.0472	12.1327	12.0087	11.9888	12.0704
1810021B22Rik	RIKEN cDNA 1810021B22 gene	15	88901626	88906282	-	ENSMUSG00000087331	0.0376989	0.0579761	0.84811	0.812303	0.110307	0.0983608	-0.194009		3.95078	3.42492	3.37568	2.78489	3.05383	2.64042	2.94204	3	3.06717	3.23781	2.40522	3.0493	2.84639	2.67432	3.14481	4.20126	2.45775	4.26326	3.57693	3.29646	3.02198	2.40878	3.29766	3.62583
Trabd	TraB domain containing	15	88905554	88917507	+	ENSMUSG00000015363	0.937272	0.162459	0.345143	0.691402	0.989816	0.00132541	0.00356511		8.4857	8.37912	8.38068	8.23775	8.50778	8.41521	8.99888	9.19722	8.78729	8.77475	8.97508	9.01343	8.5046	8.39541	8.43549	8.24902	8.46338	8.4389	8.97353	8.87389	9.17172	8.98243	9.03462	8.88887
1300018J18Rik	RIKEN cDNA 1300018J18 gene	15	88919514	88930770	+	ENSMUSG00000035757	1.11482	0.821482	0.304279	0.376099	0.0673502	-0.0185798	-0.0023151		9.11921	9.23128	9.18578	9.10952	8.94541	9.04271	9.30709	9.60199	9.36635	9.25694	9.31559	9.40038	9.2008	9.10953	9.1622	9.10812	9.22904	9.08322	9.04555	9.32445	9.38008	9.44069	9.26887	9.35158
Tubgcp6	tubulin, gamma complex associated protein 6	15	88928787	88953517	-	ENSMUSG00000051786	5.58805	0.71355	0.0288893	0.408779	0.874424	0.00644334	0.0165424		10.1105	10.187	10.2543	10.1673	10.3724	10.2172	10.1034	10.269	10.2151	9.93034	10.201	10.2966	10.3343	10.343	10.3799	10.168	10.2828	10.2642	10.0822	10.3639	10.3385	10.3797	10.4354	10.278
Hdac10	histone deacetylase 10	15	88953737	88959130	-	ENSMUSG00000062906	2.35051	0.79804	0.141725	0.382856	0.399667	0.00416423	0.000344831		7.92598	7.77365	8.10662	7.94678	8.03872	7.93504	7.68158	7.93074	7.5727	7.44168	7.69984	7.74179	7.89805	7.84424	8.07217	7.83174	8.04272	8.07062	7.63221	7.91117	7.73818	7.75751	8.01037	7.75512
Mapk12	mitogen-activated protein kinase 12	15	88961015	88971133	-	ENSMUSG00000022610	0.0203343	0.299952	0.888109	0.590289	0.791696	0.0285106	-0.0150588		6.53574	6.51238	6.5456	6.27032	6.73565	6.36834	6.36351	6.83289	6.34728	6.28844	6.709	6.56387	6.60127	6.4292	6.2682	6.65057	6.93349	6.45591	6.74685	6.60024	6.75378	6.38606	6.65129	6.39137
Mapk11	mitogen-activated protein kinase 11	15	88972916	88980036	-	ENSMUSG00000053137	1.14309	1.22578	0.298395	0.282049	0.743566	-0.00673479	-0.00329024	0.97727	10.5655	10.5071	10.657	10.67	10.6941	10.7632	9.35144	9.47168	9.32859	8.89806	9.28174	9.26431	10.5445	10.5276	10.553	10.5736	10.5999	10.4852	9.2946	9.26801	9.3995	9.40314	9.10787	9.31793
Plxnb2	plexin B2	15	88985979	89001550	-	ENSMUSG00000036606	0.85105	1.33636	0.367823	0.262007	0.196178	-0.022545	0.00315369	0.966094	10.1567	10.0359	10.1066	9.92853	10.0762	9.97133	10.6114	10.7211	10.6019	10.4163	10.6778	10.7917	10.1907	10.0985	10.1056	9.97656	10.2522	10.0651	10.228	10.4601	10.5264	10.5949	10.7406	10.4826
Fam116b	family with sequence similarity 116, member B	15	89012647	89026905	-	ENSMUSG00000015377	0.189055	0.0641468	0.668603	0.802778	0.047325	-0.0149743	-0.00464728		9.9092	9.85746	9.9673	9.67485	10.0002	9.85474	10.1445	10.4625	10.0313	9.83133	10.198	10.1428	9.85575	9.81387	9.92617	9.85176	10.0539	9.75741	9.96709	10.176	10.0364	10.3659	10.378	10.2048
Gm17401	predicted gene, 17401	15	89041990	89045443	-	ENSMUSG00000090409	2.51788	0.695122	0.129064	0.414787	0.801391	0.131535	0.0752567		3.07631	2.74685	3.52768	3.27032	4.16931	2.64042	2.45662	3.45943	3.06717	1.43046	3.40522	3.0493	3.58335	2.67432	3.79689	2.82275	3.04272	3.91534	3.89885	3.46639	2.79959	2.40878	3.12773	3.76334
Ppp6r2	protein phosphatase 6, regulatory subunit 2	15	89083466	89116692	+	ENSMUSG00000036561	2.93332	2.42501	0.103041	0.135913	0.350054	-0.00722629	0.00101496	0.350025	10.4672	10.5503	10.6247	10.5504	10.5656	10.5756	10.5108	10.6555	10.4644	10.373	10.4887	10.6105	10.5641	10.4897	10.6205	10.5656	10.6364	10.4935	10.0926	10.5911	10.7184	10.6603	10.5665	10.6168
Sbf1	SET binding factor 1	15	89118667	89145742	-	ENSMUSG00000036529	1.53714	0.474994	0.23014	0.49903	0.943209	-0.00354927	0.0109701		11.9554	11.9895	11.9135	11.8787	12.0306	11.9578	12.3115	12.3902	12.2278	12.2163	12.4304	12.3419	12.051	12.0715	12.1294	11.9479	12.0674	11.9087	12.0338	12.3869	12.3776	12.348	12.4015	12.4092
Lmf2	lipase maturation factor 2	15	89181435	89186090	-	ENSMUSG00000022614	2.00686	2.31049	0.172777	0.14497	0.375043	0.00138096	-0.000521168	0.362235	8.13521	8.14602	8.14827	7.95482	8.18996	8.29147	8.71212	8.87344	8.55443	8.5802	8.72263	8.89658	8.18624	8.09217	8.13836	7.71999	8.19922	7.70384	8.55992	8.7722	8.84398	8.75308	8.76073	8.81961
Ncaph2	non-SMC condensin II complex, subunit H2	15	89186150	89203257	+	ENSMUSG00000008690	3.28676	0.422148	0.0856715	0.523646	0.688116	-0.00272162	0.0148725		11.2595	11.2347	11.2657	11.2492	11.3253	11.2888	11.2108	11.3208	11.1682	11.1668	11.1143	11.2335	11.3877	11.3782	11.4961	11.2423	11.3631	11.3695	10.9179	11.3126	11.3776	11.3491	11.3372	11.3269
Tymp	thymidine phosphorylase	15	89203876	89207179	-	ENSMUSG00000022615	2.3578	2.6905	0.141143	0.1174	0.957505	-0.0217557	-0.0247571	0.323089	4.81328	5.42492	5.25015	4.85528	5.22375	5.22538	5.71965	5.83289	5.8144	5.23781	5.65315	5.70138	5.01631	4.99624	5.09235	4.96025	5.54522	4.97947	5.53112	5.85105	5.60694	5.45318	5.12773	5.00435
Odf3b	outer dense fiber of sperm tails 3B	15	89207881	89209685	-	ENSMUSG00000047394	0.528029	0.205809	0.476295	0.655212	0.369366	-0.0140906	0.627326		1.49135	1.42492	0.205754	2.46297	1.46887	1.64042	5.08889	5.42626	5.25981	5.55974	5.57515	5.56387	3.06878	1.67432	0.337459	0.500822	2.04272	3.04087	4.82485	5.38393	5.34391	4.93234	5.08193	5.11126
Klhdc7b	kelch domain containing 7B	15	89217322	89219139	+	ENSMUSG00000091680	0.250897	0.0235124	0.622198	0.879749	0.762801	-0.0976701	-0.135947		3.49135	3.00988	3.52768	3.27032	2.05383	2.22538	4.65825	4.85798	4.42974	4.1309	4.10566	4.24194	3.06878	3.25928	2.33746	2.50082	0.457753	0.45591	3.57693	4.54439	4.46255	4.40878	4.37566	4.11126
Chkb	choline kinase beta	15	89246836	89260339	-	ENSMUSG00000022617	2.1792	1.26117	0.156269	0.275421	0.16495	-0.0196068	0.00939829	0.97319	8.87341	8.84383	8.67836	8.67626	8.7575	8.87662	9.15861	9.47295	9.14071	8.95957	9.2182	9.26553	8.84605	8.83202	8.96561	8.64731	8.84581	8.96612	8.82124	9.21249	9.19402	9.36007	9.45245	9.22453
C730034F03Rik	RIKEN cDNA C730034F03 gene	15	89260020	89261299	+	ENSMUSG00000079242	0.243559	0.00545667	0.627303	0.941887	0.896468	0.0489331	0.0057189		3.72094	4.15936	4.51099	3.97393	3.96712	3.42283	4.58095	3.61471	3.68742	2.6258	4.59504	4.4746	4.07802	4.31007	4.07406	4.04184	3.91587	4.08701	4.64388	3.99134	3.82933	4.28751	3.28639	4.42575
Mapk8ip2	mitogen-activated protein kinase 8 interacting protein 2	15	89284344	89294899	+	ENSMUSG00000022619	7.3899	2.10136	0.0136355	0.163475	0.891001	0.00218738	0.00534802	0.886512	12.7886	12.8984	12.9185	12.7866	12.8967	12.8806	12.9878	13.1238	12.9419	12.8361	12.9871	13.027	12.9564	12.8886	12.9668	12.7735	12.8952	12.8102	12.8317	13.1068	13.2005	13.0823	13.0808	13.1211
Arsa	arylsulfatase A	15	89302907	89307856	-	ENSMUSG00000022620	6.84878	9.64149	0.0169575	0.00582881	0.608072	-0.0178874	-0.00404246	0.0507167	9.4814	9.4902	9.36709	9.28834	9.4811	9.41405	10.5312	10.6437	10.4966	10.3031	10.4746	10.5005	9.39454	9.38942	9.44017	9.26074	9.37459	9.42377	10.1103	10.4673	10.5274	10.3315	10.2783	10.3552
C230037L18Rik	RIKEN cDNA C230037L18 gene	15	89306667	89315278	+	ENSMUSG00000084915	0.00111316	0.817371	0.973732	0.377271	0.788576	0.0298888	0.0168605		4.70236	5.52506	5.71101	5.60742	5.30883	4.91468	6.47632	6.54164	6.5707	6.32624	6.3248	6.39271	5.60163	5.30367	5.30186	5.56648	5.02335	5.46848	6.59929	6.74404	6.8308	6.80778	6.90107	6.32472
Shank3	SH3/ankyrin domain gene 3	15	89330054	89390692	+	ENSMUSG00000022623	4.27417	6.77956	0.0525922	0.0174447	0.397404	-0.0223917	-0.000719129	0.101037	12.8499	12.6495	12.767	12.7132	12.871	12.901	13.9186	14.159	14.0718	13.6278	13.8144	13.8982	12.7629	12.7049	12.7709	12.5638	12.8414	12.657	13.4221	13.8586	13.9249	13.895	13.6528	13.8505
Gm15609	predicted gene 15609	15	89350527	89354108	-	ENSMUSG00000086602	0.459933	0.114517	0.505832	0.73877	0.887761	-0.00672545	0.0404229		4.44555	3.46406	3.94776	4.20173	4.31285	4.00219	4.50903	5.08491	4.46771	4.05339	4.52872	4.27845	3.63298	3.87438	4.82931	3.99652	3.09002	3.80923	4.53947	4.65472	4.77289	4.69788	5.06649	4.80853
Acr	acrosin prepropeptide	15	89398757	89405015	+	ENSMUSG00000022622	0.247881	0.0558253	0.624284	0.815749	0.763834	0.138841	-0.0810333		3.81328	4.42492	4.11264	3.78489	2.79079	3.81034	3.45662	3.80735	1.84478	2.01542	2.72715	3.24194	3.58335	3.84424	3.92242	3.08578	3.91719	3.04087	3.16189	3.29646	3.91506	3.86821	2.71269	2.88887
Rabl2	RAB, member of RAS oncogene family-like 2	15	89412964	89422354	-	ENSMUSG00000022621	0.931998	0.124927	0.346472	0.727643	0.407205	-0.00531025	0.00323527		8.96302	9.0867	8.91311	9.07768	9.09822	8.81534	9.02951	8.94837	8.92159	8.88167	9.12973	9.05573	8.97567	8.94578	9.12862	9.00465	8.98132	8.97555	8.92565	8.94392	8.88705	9.0087	8.84541	8.79576
Syt10	synaptotagmin X	15	89612824	89672291	-	ENSMUSG00000063260	1.94701	0.229363	0.179006	0.637462	0.498834	-0.0316855	0.086256		5.2987	5.97951	6.13649	5.67242	5.59815	6.25513	7.53557	6.89482	7.05423	6.71586	7.18658	7.19614	6.01631	6.25928	6.64124	6.02438	6.18567	6.15635	6.86233	7.14195	6.79959	7.40878	7.56236	7.1368
Alg10b	asparagine-linked glycosylation 10B (alpha-1,2-glucosyltransferase)	15	90054742	90060985	+	ENSMUSG00000075470	0.103832	2.16033	0.750797	0.15798	0.435792	-0.0146275	-0.0145178	0.882329	9.61288	9.71724	9.77751	9.85313	9.64628	9.78253	9.65433	9.57365	9.65856	9.38174	9.64123	9.50404	9.60794	9.47522	9.6019	9.80232	9.42354	9.67023	9.38106	9.53964	9.5433	9.55089	9.47867	9.46125
Cpne8	copine VIII	15	90317913	90509863	-	ENSMUSG00000052560	0.433655	5.61842	0.518102	0.0285082	0.186823	-0.142564	-0.0505495	0.13723	9.42209	9.38782	9.4225	9.51009	9.23052	9.16398	7.46184	7.22891	7.25981	7.86517	7.35942	7.37298	8.88713	8.82913	9.089	9.05157	9.01234	9.02645	5.86233	6.51583	6.44306	6.69418	7.23626	6.76334
Rpl31-ps8	ribosomal protein L31, pseudogene 8	15	90594677	90595092	-	ENSMUSG00000067870	0.00012559	0.0294341	0.991176	0.865595	0.190814	-0.00977896	0.000496269		11.0682	11.0117	10.9309	10.8314	10.8653	10.9375	11.1017	11.2978	11.005	11.1089	11.1276	11.1317	11.1208	10.8771	11.0293	10.9796	11.1869	10.8174	10.786	11.1414	11.1505	11.1936	11.1721	11.1857
Kif21a	kinesin family member 21A	15	90763707	90880379	-	ENSMUSG00000022629	10.5927	8.84014	0.00416995	0.0078107	0.986995	-0.00667698	0.00686456	0.0610512	12.2951	12.4097	12.4746	12.3915	12.3985	12.5548	12.6768	12.6528	12.709	12.4972	12.6764	12.7067	12.5058	12.4346	12.4942	12.4103	12.3335	12.4897	12.424	12.6848	12.6758	12.6617	12.6218	12.7035
Abcd2	ATP-binding cassette, sub-family D (ALD), member 2	15	90976315	91022238	-	ENSMUSG00000055782	0.031249	1.55152	0.861557	0.228053	0.138626	-0.0120823	-0.0183715	0.944294	11.2546	11.2014	11.3077	11.2679	11.1028	11.2798	10.451	10.3772	10.4838	10.3656	10.1551	10.3188	11.0583	11.0515	11.0336	11.2871	11.1016	11.1615	10.2045	10.3585	10.3707	10.2914	10.1598	10.1896
Slc2a13	solute carrier family 2 (facilitated glucose transporter), member 13	15	91098127	91403692	-	ENSMUSG00000036298	0.91759	8.7838	0.35014	0.00797615	0.465204	-0.0154736	-0.00641818	0.0618549	12.2039	12.3118	12.4219	12.4672	12.2986	12.4156	11.8937	11.7956	11.9122	11.7819	11.86	11.9236	12.2476	12.2327	12.2201	12.3964	12.2101	12.4032	11.5613	11.7492	11.7401	11.7641	11.7295	11.7391
Lrrk2	leucine-rich repeat kinase 2	15	91503606	91646551	+	ENSMUSG00000036273	0.882322	15.6285	0.359356	0.00085247	0.413392	-0.0433617	-0.0293035	0.0140011	11.0061	11.0276	11.0761	11.0281	11.1163	11.4582	9.33191	9.18735	9.36834	9.08867	9.32408	9.35569	10.8151	10.7776	10.5469	10.519	10.4017	10.5247	8.7815	9.03117	8.86567	8.93626	9.19919	8.95137
Cntn1	contactin 1	15	91881596	92172384	+	ENSMUSG00000055022	0.265348	0.0329679	0.612411	0.857843	0.673166	0.00506672	-0.000141243		13.0982	13.2461	13.2754	13.2673	13.2325	13.1365	13.6424	13.5421	13.674	13.6136	13.6549	13.5555	13.2193	13.1895	13.2053	13.2824	13.1469	13.256	13.5427	13.7367	13.786	13.7759	13.6205	13.7417
Pdzrn4	PDZ domain containing RING finger 4	15	92227346	92602250	+	ENSMUSG00000036218	0.355654	1.07597	0.557969	0.312623	0.904239	-0.00535501	-0.0438165	0.996882	6.57881	6.86787	6.82046	6.72975	6.87826	6.28427	6.99267	7.02237	6.63485	6.51792	6.83148	6.8118	6.26142	6.5323	6.58539	6.02438	6.15819	6.18383	7.13151	6.65402	6.75378	6.59861	7.01037	6.93326
Gxylt1	glucoside xylosyltransferase 1	15	93070173	93105592	-	ENSMUSG00000036197	0.789718	5.82013	0.385298	0.0261168	0.99145	0.03297	0.039862	0.129513	8.72017	8.69639	8.83146	8.85528	8.78175	8.72257	8.75674	8.85798	8.83724	8.76585	9.05268	8.93194	9.12251	9.07946	9.09235	9.04772	8.96951	9.23399	8.87613	9.23898	9.20898	9.30663	9.31756	9.15878
Yaf2	YY1 associated factor 2	15	93114709	93167366	-	ENSMUSG00000022634	0.250936	0.76665	0.622171	0.39219	0.0280761	-0.017173	-0.0108093		11.1831	11.2096	11.1887	11.2727	11.1942	11.1283	10.925	10.8742	10.8964	10.8599	10.7238	10.7753	11.1225	11.0297	11.0662	11.2649	11.1443	11.2033	10.547	10.8141	10.773	10.7509	10.7415	10.7715
Zcrb1	zinc finger CCHC-type and RNA binding motif 1	15	93216528	93228765	-	ENSMUSG00000022635	0.082015	0.71646	0.777684	0.407843	0.0875522	-0.0118024	-0.0224191		9.77906	9.69405	9.84056	9.72035	9.49123	9.60908	9.82294	9.87958	9.82396	10.0304	9.71128	9.67866	9.53289	9.46873	9.65487	9.64037	9.5715	9.79353	9.46262	9.77624	9.93914	9.87842	9.82817	9.68329
Pphln1	periphilin 1	15	93228781	93322344	+	ENSMUSG00000036167	0.10071	1.61129	0.75444	0.219639	0.0169026	-0.0260254	-0.0358956	0.936619	9.86639	9.90268	10.1156	9.75068	9.73565	9.91887	10.0874	9.88722	9.95852	9.863	9.75395	9.70751	9.62556	9.69668	9.48974	9.8802	9.61004	9.58519	9.69846	9.80228	9.65341	9.77073	9.62159	9.77355
Prickle1	prickle homolog 1 (Drosophila)	15	93329545	93426322	-	ENSMUSG00000036158	2.73388	0.454346	0.114668	0.508397	0.0232146	0.0147001	0.0426862		11.154	11.2226	11.1737	11.1781	11.2818	11.536	10.8212	10.8634	10.7853	10.7365	10.7737	10.9179	11.7558	11.6932	11.5334	11.3518	11.4599	11.5723	10.9123	11.0696	10.9653	10.7968	10.8734	10.9514
Adamts20	a disintegrin-like and metallopeptidase (reprolysin type) with thrombospondin type 1 motif, 20	15	94100594	94295849	-	ENSMUSG00000022449	0.399177	1.92131	0.535044	0.181765	0.0543941	-0.044783	-0.0141305	0.904878	8.05359	8.11142	8.1773	7.81169	8.09092	7.84987	8.47899	8.54303	8.3151	8.16517	8.52416	8.5995	8.11317	7.85422	8.03095	8.07825	8.14425	8.07062	7.84371	8.16683	8.1919	8.29753	8.47646	8.16189
Pus7l	pseudouridylate synthase 7 homolog (S. cerevisiae)-like	15	94353119	94373978	-	ENSMUSG00000033356	0.00325649	1.20189	0.955089	0.286647	0.903879	0.0437998	0.0190616	0.980203	5.73928	6.2829	6.52768	6.21785	6.46887	5.72788	6.30461	5.88264	5.87452	5.71586	5.92878	5.7338	6.54683	6.34674	6.00988	5.96025	6.38849	6.5003	6.57693	6.15444	6.12151	5.73071	6.35655	5.82747
Irak4	interleukin-1 receptor-associated kinase 4	15	94374074	94412246	+	ENSMUSG00000059883	0.0298169	0.0946874	0.864733	0.761648	0.672032	0.044967	-0.0256171		5.34983	4.94974	5.25015	5.05033	5.59897	5.28485	5.56129	5.75515	5.81624	5.92295	5.57515	5.85754	5.58443	4.58217	4.98477	5.63134	5.10161	5.26429	5.43689	6.29691	6.16928	6.05293	6.08239	6.16313
Twf1	twinfilin, actin-binding protein, homolog 1 (Drosophila)	15	94408382	94420320	-	ENSMUSG00000022451	3.78391	2.92786	0.0666974	0.10334	0.947384	0.00377676	0.00221459	0.300238	9.99912	9.97947	10.1141	10.1353	9.97662	10.0434	10.4224	10.5098	10.3839	10.6819	10.4564	10.518	10.099	9.99171	10.0687	10.2321	10.078	10.1821	10.4564	10.5047	10.4732	10.5862	10.4951	10.3979
Tmem117	transmembrane protein 117	15	94459616	94926528	+	ENSMUSG00000063296	4.15996	22.3608	0.0555431	0.00014614	0.00738132	0.0479256	0.132606	0.00400751	6.37399	6.46932	6.25015	6.76675	6.77265	6.36834	8.7346	8.76155	8.75167	9.05616	8.95597	8.80419	7.28379	7.30367	7.0379	7.20126	6.9007	6.75969	9.04453	9.22424	9.23699	9.23533	9.11072	9.15253
Nell2	NEL-like 2 (chicken)	15	95049881	95359137	-	ENSMUSG00000022454	9.50021	10.4269	0.00613301	0.00441654	0.684681	-0.00726017	-0.000793665	0.0433717	13.6647	13.7473	13.7899	13.7918	13.7768	13.7736	13.5876	13.6114	13.5819	13.4033	13.4333	13.5717	13.6951	13.7103	13.7637	13.6534	13.7279	13.6957	13.2325	13.5771	13.6752	13.4693	13.4485	13.5905
Dbx2	developing brain homeobox 2	15	95453994	95486391	-	ENSMUSG00000045608	0.00171322	1.1472	0.967416	0.297554	0.00969323	-0.0315836	-0.0324245	0.988571	8.51372	8.30757	8.35041	8.44596	8.21033	8.26247	8.47008	8.43045	8.34728	8.32527	8.11258	8.35569	8.14407	8.06663	8.14481	8.13745	8.49118	8.25033	7.90784	8.25647	8.28609	8.36878	8.23102	8.3646
Ano6	anoctamin 6	15	95621274	95805180	+	ENSMUSG00000064210	2.36788	1.13116	0.140343	0.300859	0.150849	-0.010514	0.00810414	0.990623	8.86639	8.72413	8.7794	8.74374	8.71679	8.84009	9.19539	9.21917	9.2111	9.03037	9.18658	9.3347	8.77318	8.92224	8.88821	8.76761	8.87982	8.87797	8.94325	9.13567	9.25628	9.39747	9.30515	9.2376
2610037D02Rik	RIKEN cDNA 2610037D02 gene	15	95965250	96114039	-	ENSMUSG00000086809	0.159366	0.18653	0.694192	0.670682	0.518204	-0.374545	-0.0249006		3.07631	3.23228	3.37568	2.78489	3.05383	2.22538	2.45662	3.16993	1.84478	2.01542	3.40522	3.0493	2.84639	3.25928	3.33746	1.50082	1.45775	0.45591	2.57693	0.296464	1.79959	2.99374	2.44966	1.88887
4833422M21Rik	RIKEN cDNA 4833422M21 gene	15	96062301	96085115	-	ENSMUSG00000085460	0.988461	0.966276	0.332613	0.337963	0.0508446	0.273277	0.3477		1.49135	3.00988	2.52768	2.46297	3.27622	3.64042	2.94204	2	2.58174	3.60038	2.40522	3.0493	3.06878	3.25928	3.14481	3.50082	3.04272	2.04087	4.48382	2.88143	2.21462	3.57871	0.127731	1.88887
Arid2	AT rich interactive domain 2 (ARID, RFX-like)	15	96117949	96235423	+	ENSMUSG00000033237	4.96923	5.89502	0.0380686	0.0252875	0.0435083	-0.0226553	-0.00313473	0.127082	10.0987	10.1114	10.173	10.0442	10.1606	10.1039	10.1736	10.1874	10.3001	9.85252	10.04	10.1352	10.1163	10.1581	10.0134	10.0126	10.0143	10.0577	9.81533	10.0941	10.057	10.0988	10.1431	10.1681
Scaf11	SR-related CTD-associated factor 11	15	96242129	96291274	-	ENSMUSG00000033228	0.920435	1.14927	0.349411	0.29713	0.1422	-0.00164778	-0.00214591	0.988437	10.6142	10.6147	10.6815	10.6626	10.6262	10.5488	11.0204	10.8742	10.9801	10.9725	10.915	10.9467	10.6375	10.6673	10.5371	10.8194	10.5896	10.7528	10.7997	11.0396	10.9812	11.1179	10.9009	10.9701
Slc38a1	solute carrier family 38, member 1	15	96401849	96473344	-	ENSMUSG00000023169	9.41888	3.97242	0.00631615	0.0608119	0.0434478	-0.00604266	-0.00612196	0.21789	12.3139	12.366	12.4705	12.1981	12.2846	12.308	13.1452	13.0805	13.1686	12.687	12.8495	12.9947	12.3359	12.3118	12.2752	12.2393	12.1861	12.2947	12.9115	13.0953	13.1494	13.0641	12.9311	12.9922
Slc38a2	solute carrier family 38, member 2	15	96517825	96530129	-	ENSMUSG00000022462	4.72526	5.241	0.0425694	0.033681	0.111625	0.00359721	0.00288496	0.15206	11.8138	11.6911	11.7723	11.6485	11.7766	11.8692	11.8858	11.6631	11.7151	11.7008	11.8825	12.0477	11.8155	11.831	11.7325	11.6307	11.6751	11.8843	11.701	11.7993	11.8906	11.6603	11.6785	11.8421
Slc38a4	solute carrier family 38, member 4	15	96825254	96886387	-	ENSMUSG00000022464	0.00585954	1.54949	0.939784	0.228347	0.314005	0.037012	0.00122417	0.944386	3.95078	3.00988	4.20575	4.36986	4.37576	4.54731	2.94204	2.32193	2.25981	3.01542	3.72715	3.0493	3.26142	4.25928	3.65939	3.96025	3.91719	3.77784	2.16189	2.61839	3.02198	2.99374	2.93509	3.76334
Amigo2	adhesion molecule with Ig like domain 2	15	97074505	97077718	-	ENSMUSG00000048218	1.4386	3.15854	0.24511	0.0915432	0.559016	-0.0348087	0.011699	0.279824	6.90074	6.51238	6.84961	6.67242	6.65869	6.6177	9.84377	10.0251	10.013	9.863	10.1601	10.2588	6.65374	6.7404	7.10564	6.72964	6.93349	7.04087	9.53403	9.75999	9.54778	9.82452	9.74244	9.74685
Pced1b	PC-esterase domain containing 1B	15	97077538	97216120	+	ENSMUSG00000044250	0.923503	0.0713532	0.348628	0.792254	0.0544014	-0.0273693	-0.0149723		5.91761	5.85119	5.87818	5.59225	5.75427	5.64042	6.71965	6.96578	6.50774	5.85672	6.49268	6.4514	5.47088	5.95972	5.95217	5.89314	5.91719	5.26326	6.40982	6.44621	6.78448	6.67557	6.94791	6.76334
Rpap3	RNA polymerase II associated protein 3	15	97505536	97536253	-	ENSMUSG00000022466	0.072621	1.11674	0.790463	0.303874	0.0188991	-0.0320065	-0.0156463	0.992618	9.04977	9.16301	9.15704	9.1176	9.06506	9.03702	8.99888	8.9571	9.01804	9.14126	8.85643	8.92494	9.0395	8.9872	8.91489	9.25237	8.97345	9.25681	8.53693	8.69734	8.8764	8.95181	8.83163	8.98339
Endou	endonuclease, polyU-specific	15	97541450	97561836	-	ENSMUSG00000022468	0.323011	30.1969	0.57646	2.66e-05	0.0709753	-0.416325	-0.353075	0.00111324	6.93429	6.51238	6.69761	5.74837	5.67832	5.64042	9.18454	9.31967	9.07999	8.30082	8.12632	7.90016	4.65374	4.13375	4.24435	4.30818	4.26511	4.26326	5.27736	5.25066	5.57217	4.40878	5.44966	5.00435
Rapgef3	Rap guanine nucleotide exchange factor (GEF) 3	15	97575201	97598403	-	ENSMUSG00000022469	1.59342	11.6555	0.222113	0.0029107	0.00401199	-0.0648061	-0.0371271	0.0322534	9.33329	9.36409	9.3061	9.12096	9.10538	9.15193	10.1831	10.2177	10.0345	9.63984	9.90883	9.87982	9.08135	8.9266	8.95584	8.78043	9.09409	8.86522	9.36153	9.52915	9.57215	9.51207	9.75284	9.72372
Slc48a1	solute carrier family 48 (heme transporter), member 1	15	97614786	97623123	+	ENSMUSG00000081534	0.0743604	3.81975	0.788032	0.0655295	0.611041	-0.0190702	-0.000188634	0.228174	11.8312	11.7797	11.8711	11.7449	11.8788	11.787	11.9453	12.0738	11.8396	12.0575	12.0834	12.0453	11.8341	11.8049	11.8363	11.6745	11.8164	11.6793	11.5825	11.7492	11.8431	11.8356	11.865	11.7741
Hdac7	histone deacetylase 7	15	97623095	97674933	-	ENSMUSG00000022475	0.0209242	0.22881	0.886509	0.637866	0.311928	-0.0401518	0.00622435		9.3431	9.14944	9.32987	9.15296	9.53226	9.03274	8.78933	9.00843	8.62176	8.38465	8.79324	8.68489	9.32482	9.31094	9.35983	9.23553	9.31262	9.15635	8.24935	8.60935	8.50003	8.64719	8.80721	8.46378
Vdr	vitamin D receptor	15	97684856	97741061	-	ENSMUSG00000022479	0.334877	2.32724	0.569598	0.143601	0.11205	0.530054	0.148818	0.360058	4.73928	3.74685	4.66519	4.63289	4.27622	4.22538	5.13469	3.90689	2.58174	5.1309	5.92878	5.96986	4.84639	5.5323	4.72978	4.08578	5.70568	4.70384	5.33181	6.12935	6.32315	5.96337	5.93509	5.88887
Tmem106c	transmembrane protein 106C	15	97794710	97800705	+	ENSMUSG00000052369	0.337465	4.66934	0.568124	0.0436847	0.00148581	-0.0472253	-0.0520956	0.177924	8.80876	8.88025	8.70958	8.41716	8.30176	8.37513	8.89956	8.9571	8.96025	8.76585	8.84816	8.95962	8.19216	8.4881	8.34308	8.38347	8.2193	8.29511	8.50766	8.51078	8.53204	8.79249	8.77878	8.77558
Col2a1	collagen, type II, alpha 1	15	97806033	97835126	-	ENSMUSG00000022483	0.334057	0.198319	0.570067	0.661114	0.301088	-0.0823321	0.481171		3.49135	2.74685	3.90619	4.55043	4.99243	4.54731	5.7494	5.90689	5.42974	5.67838	6.31211	5.85665	4.90528	5.19788	4.92242	3.82275	4.91719	5.15635	4.03636	5.7559	5.88705	6.08121	6.52005	5.51336
Senp1	SUMO1/sentrin specific peptidase 1	15	97871660	97923836	-	ENSMUSG00000033075	0.992192	1.06439	0.331725	0.315171	0.132155	-0.0291381	-0.00828161	0.998356	7.78597	7.90874	8.27184	7.9387	8.00802	7.91654	8.15706	8.2854	8.26544	7.88989	8.19964	8.02985	8.03621	7.77235	7.95951	7.93545	8.03518	7.75969	7.42242	8.27946	8.28609	8.47487	8.39452	8.16809
Pfkm	phosphofructokinase, muscle	15	97923020	97962878	+	ENSMUSG00000033065	1.53097	2.65181	0.231042	0.119901	0.655185	-0.0105669	0.00148701	0.326833	13.3507	13.4086	13.4059	13.4153	13.3665	13.3378	13.465	13.603	13.4504	13.4387	13.415	13.494	13.4032	13.4271	13.3946	13.351	13.3775	13.3251	13.118	13.4629	13.5094	13.4112	13.4156	13.4069
Asb8	ankyrin repeat and SOCS box-containing 8	15	97965068	97996056	-	ENSMUSG00000048175	0.00144289	0.0359394	0.970096	0.851651	0.0326328	-0.0155353	0.00172776		9.86421	9.79996	9.83329	9.80948	9.73565	9.73318	10.1248	10.2336	10.1069	10.1378	9.96746	10.089	9.94617	9.71597	9.88628	9.94377	9.88402	9.92759	9.81054	10.1166	10.0648	10.111	10.1107	10.1016
AI836003	expressed sequence AI836003	15	97998237	98000565	+	ENSMUSG00000029875	8.22232	11.8285	0.00985809	0.00274898	0.934243	-0.0267023	0.000213433	0.0310733	9.27598	9.26413	9.31428	9.33024	9.19679	9.25144	9.98644	9.96434	9.94806	9.5494	9.84401	9.99014	9.28379	9.22506	9.35148	9.05924	9.27474	9.12834	9.43491	9.79631	9.86926	9.57117	9.64146	9.7427
Olfr287	olfactory receptor 287	15	98038068	98051487	-	ENSMUSG00000090129	0.0755499	15.5975	0.786388	0.00086013	0.505411	-0.113998	-0.353665	0.0141113	7.32639	7.21322	7.06895	6.69044	6.77265	6.65477	7.96872	7.88533	7.81938	7.73852	7.75625	7.65473	4.42008	4.58121	4.96507	4.20126	4.69883	4.68165	7.08472	7.01715	6.87283	7.08107	7.06649	6.78949
Zfp641	zinc finger protein 641	15	98116553	98126514	-	ENSMUSG00000022987	0.0393558	0.738802	0.844853	0.40076	0.0151076	-0.0277175	-0.0723676		8.43386	8.47477	8.30904	8.30846	8.09822	7.9442	7.96758	8.30378	8.00801	8.03779	7.82307	7.84186	7.68769	7.88377	7.82128	7.88453	8.09438	7.74131	7.63221	7.85871	8.11549	8.17697	8.05847	8.07869
Kansl2	KAT8 regulatory NSL complex subunit 2	15	98349532	98364652	-	ENSMUSG00000022992	0.35341	0.0453083	0.559202	0.833705	0.019259	-0.0133612	-0.0058614		10.2107	10.2891	10.2253	10.2509	10.1	10.1654	10.1333	10.0967	10.0013	10.0543	9.97697	10.0151	10.0959	10.2154	10.2338	10.3114	10.2309	10.1459	9.80093	10.0141	10.0123	10.1023	10.166	9.98515
Ccnt1	cyclin T1	15	98369120	98401354	-	ENSMUSG00000011960	0.682404	0.666361	0.419013	0.42444	0.43955	0.00750323	0.00695643		9.98021	10.0733	10.1537	10.0603	10.1601	9.96638	10.0839	9.99886	10.1047	9.89949	10.1192	10.0519	10.1903	10.0555	10.1715	10.2569	10.1205	10.2564	10.1348	10.1403	10.1389	10.0999	10.1316	10.1087
9330020H09Rik	RIKEN cDNA 9330020H09 gene	15	98397755	98400014	+	ENSMUSG00000091050	3.38377	4.03373	0.0815206	0.0590286	0.00310321	-0.0879656	-0.0818074	0.213974	4.34834	4.6336	3.82868	3.84009	3.11963	3.84362	4.08142	4.07125	3.76571	3.79503	3.74578	3.30889	4.195	4.01914	3.54847	4.33675	4.09351	4.29082	3.95127	3.47757	3.44113	4.25277	3.33718	3.8174
Adcy6	adenylate cyclase 6	15	98420425	98438064	-	ENSMUSG00000022994	3.94637	1.88784	0.0615885	0.18544	0.450542	-0.0115338	0.0118926	0.907215	10.276	10.2355	10.4358	10.2767	10.494	10.4169	10.4293	10.6636	10.3762	10.0248	10.4262	10.472	10.4251	10.3954	10.4948	10.2904	10.4994	10.4275	10.2529	10.3706	10.4826	10.5108	10.4886	10.374
Cacnb3	calcium channel, voltage-dependent, beta 3 subunit	15	98462651	98474961	+	ENSMUSG00000003352	0.2397	1.85709	0.630028	0.188896	0.508556	-0.0226392	0.000974938	0.911861	12.8428	12.692	12.7269	12.7324	12.7826	12.6797	11.2162	11.6334	11.4127	11.3686	11.6189	11.4144	12.7784	12.731	12.7897	12.6854	12.8379	12.6898	10.8966	11.3719	11.2181	11.3586	11.3875	11.368
Ddx23	DEAD (Asp-Glu-Ala-Asp) box polypeptide 23	15	98475565	98493320	-	ENSMUSG00000003360	4.36624	4.42326	0.0503441	0.0490072	0.0192329	-0.000657541	0.0174217	0.19137	10.5762	10.4964	10.5232	10.5974	10.7085	10.7645	10.59	10.7665	10.625	10.6004	10.79	10.8437	10.7351	10.608	10.803	10.5218	10.5845	10.5787	10.5224	10.6518	10.7864	10.5949	10.768	10.7291
Rnd1	Rho family GTPase 1	15	98493852	98507892	-	ENSMUSG00000054855	0.422406	0.661652	0.52352	0.426054	0.579433	-0.026981	0.0275115		9.66628	9.69405	9.5873	9.93667	10.0368	9.74633	8.73832	8.76487	8.75567	8.73879	8.25071	8.53196	9.79864	9.98038	9.96499	10.1026	9.91923	9.86318	8.44729	8.49614	8.60694	8.63278	8.58716	8.68329
Ccdc65	coiled-coil domain containing 65	15	98538658	98553767	+	ENSMUSG00000003354	0.19852	2.55021	0.660953	0.126778	0.874083	-0.0276942	-0.00126224	0.338006	6.90074	7.53345	7.3555	7.41716	7.28904	7.47331	7.41081	7.50779	7.5266	7.48574	7.50325	7.37123	7.36995	7.10058	7.29166	7.22874	7.25217	7.19738	7.19164	7.32989	7.30209	7.39747	7.45865	7.24642
Fkbp11	FK506 binding protein 11	15	98554804	98558629	-	ENSMUSG00000003355	0.0102937	3.95601	0.92025	0.0612997	0.0903386	0.275556	0.276456	0.218607	3.81328	3.59485	3.37568	3.78489	4.55633	3.44777	3.45662	3.58496	3.96025	3.88989	3.86465	3.70138	4.43135	4.99624	4.33746	4.30818	4.70568	4.70384	4.66439	4.29646	5.0726	4.49625	3.29766	4.30391
Arf3	ADP-ribosylation factor 3	15	98568052	98593645	-	ENSMUSG00000051853	2.85948	6.21927	0.107176	0.0220241	0.014946	-0.0103179	-0.0113521	0.117031	14.7641	14.7471	14.7624	14.6585	14.6941	14.6603	13.8248	13.8604	13.7719	13.571	13.8125	13.8075	14.5693	14.5667	14.6351	14.5833	14.6753	14.5854	13.5158	13.7267	13.787	13.7301	13.8885	13.7949
Ddn	dendrin	15	98634213	98638356	-	ENSMUSG00000059213	1.03541	0.00467177	0.321674	0.946221	0.866779	-0.0237983	-0.00676584		14.4766	14.4501	14.4702	14.3982	14.5189	14.4389	10.4316	10.403	10.0557	11.2688	11.2182	10.5226	14.2966	14.3018	14.5048	14.3044	14.5266	14.3664	10.3566	10.1245	9.67405	9.94198	12.0225	10.5589
B130046B21Rik	RIKEN cDNA B130046B21 gene	15	98637463	98646508	+	ENSMUSG00000085373	0.062652	0.409444	0.805039	0.529893	0.267027	-0.0778885	0.0545313		6.70256	6.90616	6.71766	6.61596	6.66461	6.26071	5.69234	5.67582	5.48632	5.38883	6.11037	5.20588	7.21806	7.12239	7.09435	7.1217	6.90384	6.60179	4.83091	5.05722	5.65358	5.49964	6.24147	5.70717
Prkag1	protein kinase, AMP-activated, gamma 1 non-catalytic subunit	15	98643229	98661939	-	ENSMUSG00000067713	0.653378	1.11971	0.428913	0.303248	0.817602	-0.0059076	0.00308206	0.991947	9.8986	10.0169	9.90428	9.87852	10.0516	9.94623	10.218	10.1847	10.1495	10.1239	10.1863	10.3052	9.95992	10.0182	9.93359	10.006	10.0027	9.94429	9.9343	10.1927	10.2448	10.2225	10.1746	10.1427
Mll2	myeloid/lymphoid or mixed-lineage leukemia 2	15	98662100	98701614	-	ENSMUSG00000048154	3.80842	2.12127	0.065896	0.161594	0.642398	-0.0155882	0.0192404	0.885371	10.8794	10.9268	11.157	10.8892	11.3803	11.1462	11.314	11.4512	11.2314	10.624	11.3703	11.3301	11.2315	11.2602	11.1056	10.8205	11.1169	11.1221	10.9831	11.2866	11.1969	11.2952	11.5629	11.4092
Rhebl1	Ras homolog enriched in brain like 1	15	98708209	98711835	-	ENSMUSG00000023755	0.12998	0.34511	0.72243	0.563811	0.836545	0.0174813	0.0296237		6.21927	6.44729	6.33504	6.32095	6.30176	6.47331	6.47454	6.32193	6.25981	6.36119	6.3825	6.43177	6.50935	6.6516	6.40355	6.56691	6.76153	6.81346	6.59929	6.42575	6.36437	6.26676	6.05847	6.53273
Lmbr1l	limb region 1 like	15	98734352	98748662	-	ENSMUSG00000022999	0.00679806	1.38966	0.935151	0.253015	0.864204	0.0150316	0.0285112	0.964011	7.27271	7.12536	7.07612	7.21785	7.15537	7.39531	7.38262	7.69349	7.59966	7.45282	7.54477	7.5995	7.29485	7.27423	7.51737	7.29524	7.36464	7.19738	7.69587	7.73109	7.58966	7.80966	7.97948	7.56129
Tuba1b	tubulin, alpha 1B	15	98761856	98764996	-	ENSMUSG00000023004	4.47931	3.90039	0.0477323	0.062987	0.133357	-0.00914971	-0.0045861	0.222483	13.7635	13.8074	13.8392	13.683	13.6346	13.7124	14.2094	14.2944	14.1653	14.0199	14.0175	14.1869	13.7557	13.7244	13.7399	13.648	13.6638	13.5441	13.9057	14.1551	14.218	14.1201	14.1251	14.1654
Tuba1a	tubulin, alpha 1A	15	98780272	98783982	-	ENSMUSG00000072235	1.41617	3.55831	0.248693	0.0746281	0.111651	-0.0110066	-0.0103139	0.24783	14.3146	14.3932	14.398	14.2959	14.2216	14.1755	15.0506	15.1091	14.9877	14.9749	14.871	14.9507	14.1795	14.1637	14.3182	14.1365	14.1678	14.021	14.7152	14.9353	15	14.9183	15.0164	15.01
Tuba1c	tubulin, alpha 1C	15	98860322	98868536	+	ENSMUSG00000043091	0.657274	0.00416642	0.427563	0.949208	5.82e-14	0.738206	0.568196		5.21709	4.35471	4.50148	9.89377	9.93071	10.0173	4.48801	5.19613	4.45043	10.2586	10.4763	10.6605	7.1785	7.61425	7.27692	6.38395	6.68849	7.1856	8.08035	8.22365	8.2648	7.70973	8.03047	7.79624
Prph	peripherin	15	98885605	98889409	+	ENSMUSG00000023484	1.36082	0.300984	0.257829	0.589656	0.598428	0.112172	-0.171562		3.95078	3.74685	3.90619	3.04793	3.05383	2.64042	6.26397	6.37504	6.06717	6.71586	5.89707	7.09992	2.84639	3.25928	3.50738	2.08578	3.26511	3.04087	6.93448	6.98296	6.88705	6.78382	7.27748	7.52308
Spats2	spermatogenesis associated, serine-rich 2	15	98957276	99042897	+	ENSMUSG00000051934	0.903959	5.39536	0.353661	0.0314464	0.231729	0.00987328	0.00466798	0.145846	9.76048	9.69639	9.80752	9.82491	9.7772	9.66832	9.20615	9.17742	9.01804	9.19201	9.15676	9.11846	9.76127	9.79844	9.84128	9.81597	9.99691	9.88008	9.18426	9.25647	9.23143	9.25741	9.25959	9.30672
Kcnh3	potassium voltage-gated channel, subfamily H (eag-related), member 3	15	99055407	99073248	+	ENSMUSG00000037579	0.470773	0.051385	0.500919	0.823092	0.873509	-0.00223938	0.0131164		12.1334	12.0415	12.0034	12.0418	12.1827	12.0498	6.17908	6.35755	6.19055	7.46388	7.64362	6.4514	12.212	12.1984	12.2425	12.0506	12.3733	12.1424	6.33181	6.05135	6.30209	5.99374	8.62359	6.62583
Mcrs1	microspherule protein 1	15	99073249	99082392	-	ENSMUSG00000037570	0.00223513	0.00238051	0.962786	0.961596	0.291977	-0.00783216	-0.00234728		10.5601	10.515	10.4874	10.4658	10.4773	10.4654	10.1667	10.2009	10.0493	10.0761	10.0847	10.0315	10.4782	10.4392	10.5711	10.4389	10.3947	10.2951	9.89885	10.1198	10.1601	10.2129	10.2336	10.1942
Fam186b	family with sequence similarity 186, member B	15	99101449	99117611	-	ENSMUSG00000078907	2.64565	1.70243	0.120305	0.207554	0.393947	-0.0632074	0.0523202	0.925864	4.57881	4.12536	4.96064	3.78489	4.63879	4.44777	4.65825	5.16993	5.3891	5.07431	5.69062	4.8858	4.06878	5.06663	5.24435	4.58829	5.04272	4.54337	4.57693	4.94032	4.73818	5.31567	5.21519	5.2108
Prpf40b	PRP40 pre-mRNA processing factor 40 homolog B (yeast)	15	99125518	99147449	+	ENSMUSG00000023007	1.89507	1.61729	0.184638	0.218818	0.18863	-0.0116659	-0.000200077	0.933544	10.162	10.3512	10.4054	10.2361	10.5201	10.3252	10.2208	10.5187	10.2485	10.0304	10.3046	10.2434	10.2656	10.2366	10.4103	10.1697	10.4061	10.2825	10.0466	10.2752	10.3047	10.4843	10.5769	10.2954
Fmnl3	formin-like 3	15	99147656	99200913	-	ENSMUSG00000023008	0.0596575	10.9331	0.809656	0.00371045	0.255881	0.0265753	0.0276363	0.0383464	8.6309	8.60483	8.44893	8.67242	8.46887	8.30575	8.95167	9.18239	8.93224	8.75688	8.83985	8.91083	8.74926	8.84424	8.80098	8.63525	8.94961	8.66048	9.22798	9.28231	9.27532	9.2032	9.48748	9.17119
Tmbim6	transmembrane BAX inhibitor motif containing 6	15	99223313	99240480	+	ENSMUSG00000023010	0.139372	0.769127	0.713039	0.391442	0.575125	-0.000283541	-0.00118643		12.5289	12.4772	12.479	12.4517	12.5033	12.5034	13.0453	13.1064	12.9347	13.0867	13.0799	13.1456	12.5123	12.4246	12.5036	12.3918	12.4891	12.3174	12.8629	13.0737	13.1387	13.0867	13.1114	13.102
Nckap5l	NCK-associated protein 5-like	15	99252466	99288179	-	ENSMUSG00000023009	1.4582	0.0817428	0.242034	0.778043	0.696644	0.00312895	0.0385587		8.73452	8.71494	8.75253	8.72473	8.96472	8.6177	8.98018	9.11886	8.90006	8.78801	9.10208	9.0233	9.05584	9.00523	9.15124	8.83621	8.96555	9.01815	8.61035	9.20335	9.26988	9.32164	9.2774	9.22277
Bcdin3d	BCDIN3 domain containing	15	99300515	99305161	-	ENSMUSG00000037525	1.32637	0.750734	0.263739	0.397054	0.357762	0.0228728	0.0692861		5.77675	6.15284	6.33504	5.85528	6.32685	5.99797	6.45662	6.55459	6.23709	6.15838	6.3825	6.41187	6.63646	6.34674	6.54691	6.17325	6.81531	6.41011	6.27736	6.91117	6.50003	6.74863	6.96062	6.74685
Faim2	Fas apoptotic inhibitory molecule 2	15	99327436	99358448	-	ENSMUSG00000023011	8.47334	0.432336	0.00896135	0.518732	0.795765	0.00624761	0.00773146		13.5874	13.6411	13.6889	13.5464	13.5975	13.6657	13.5942	13.613	13.5114	13.3896	13.5559	13.6548	13.72	13.7146	13.7992	13.6547	13.6731	13.6007	13.5084	13.704	13.7607	13.6989	13.6711	13.7734
Racgap1	Rac GTPase-activating protein 1	15	99450927	99482087	-	ENSMUSG00000023015	0.192719	0.201779	0.665615	0.658371	0.00961717	-0.0243118	-0.0106382		8.33055	8.11841	8.04496	7.87236	7.91181	7.84009	8.0456	8.04445	7.85227	7.94616	8.06079	7.96359	8.02297	7.9781	8.23228	8.13018	8.25865	8.17016	7.7368	7.7722	7.85125	7.99412	8.16115	7.88118
Accn2	amiloride-sensitive cation channel 2, neuronal	15	99501149	99531559	+	ENSMUSG00000023017	1.18112	3.84934	0.290723	0.0645828	0.245493	-0.0341372	0.00434913	0.226121	10.7369	10.7792	10.7498	10.6906	10.8076	10.7851	10.3158	10.5187	10.407	10.2962	10.415	10.357	10.8426	10.7894	10.7742	10.5561	10.8565	10.7756	9.90784	10.1791	10.0881	10.1885	10.5222	10.2926
Smarcd1	SWI/SNF related, matrix associated, actin dependent regulator of chromatin, subfamily d, member 1	15	99532718	99544426	+	ENSMUSG00000023018	0.903772	5.29142	0.35371	0.0329317	0.122034	-0.016657	-0.012609	0.149745	11.9347	11.9833	12.0103	11.8755	11.9288	11.8919	11.3039	11.4283	11.2357	11.2434	11.3608	11.3485	11.7976	11.8555	11.8222	11.8187	11.9324	11.7038	10.9508	11.2227	11.2286	11.1843	11.4252	11.3032
Gpd1	glycerol-3-phosphate dehydrogenase 1 (soluble)	15	99547946	99555436	+	ENSMUSG00000023019	0.0600549	4.22825	0.809037	0.0537567	0.605503	-0.0807664	-0.00151518	0.202547	11.241	11.2158	11.1274	11.0777	11.2914	11.113	10.6835	10.6909	10.6658	10.6411	10.7136	10.5591	11.2075	11.1212	11.2047	11.1246	11.345	11.1898	9.53907	9.94212	9.97118	9.90657	9.96048	9.89052
2310016M24Rik	RIKEN cDNA 2310016M24 gene	15	99556049	99558567	+	ENSMUSG00000023020	3.41869	8.16905	0.0800842	0.0100611	0.0557102	0.0231586	0.0348583	0.0712383	9.5412	9.29529	9.47488	9.2078	9.39664	9.26977	9.43161	9.62753	9.62176	9.37882	9.3448	9.45626	9.82938	9.6256	9.84327	9.71514	9.82844	9.68953	9.6131	9.84143	9.89058	9.77729	9.81773	9.81566
Lass5	LAG1 homolog, ceramide synthase 5	15	99563937	99603316	-	ENSMUSG00000023021	0.758543	2.73196	0.394656	0.114788	0.00831577	-0.022	-0.0208038	0.319212	9.44845	9.50441	9.61514	9.44881	9.3996	9.1679	9.61649	9.81698	9.67556	9.73879	9.52934	9.66401	9.3302	9.22121	9.42227	9.28218	9.46338	9.46434	9.41613	9.52047	9.53204	9.5762	9.62359	9.73017
Lima1	LIM domain and actin binding 1	15	99608901	99705859	-	ENSMUSG00000023022	0.284655	11.2992	0.599853	0.00327812	0.257291	-0.0525786	-0.0569617	0.0349727	8.56817	8.45283	8.37568	8.33333	8.35761	8.16398	8.87278	8.7879	8.78729	8.69724	8.8061	8.7537	7.7928	8.03187	8.12536	8.14468	7.98913	7.79576	7.99478	8.53964	8.52296	8.2853	8.55818	8.37
Larp4	La ribonucleoprotein domain family, member 4	15	99800505	99846782	+	ENSMUSG00000023025	1.31438	0.0377198	0.265837	0.848068	0.0665441	-0.0154654	-0.0167047		10.5466	10.4666	10.5894	10.659	10.4646	10.3598	10.5931	10.3987	10.613	10.4625	10.478	10.4094	10.4426	10.3073	10.3247	10.5975	10.3001	10.5233	10.315	10.4102	10.3908	10.4627	10.3625	10.4345
Dip2b	DIP2 disco-interacting protein 2 homolog B (Drosophila)	15	99869095	100049904	+	ENSMUSG00000023026	1.09814	2.40571	0.307823	0.137391	0.325675	-0.0135234	0.0046168	0.351506	11.0857	11.1931	11.2752	11.227	11.2576	11.2606	11.0181	10.9887	10.9028	10.8367	10.955	10.9968	11.3072	11.2125	11.1892	11.2674	11.2554	11.2817	10.6697	10.8625	10.9323	10.9323	10.9327	10.9487
Atf1	activating transcription factor 1	15	100058250	100091675	+	ENSMUSG00000023027	7.21431	6.65476	0.0146257	0.0183635	0.420183	-0.0134516	0.0129679	0.104096	7.81328	7.71954	7.67336	7.72975	7.74499	7.7697	7.7346	7.72792	7.69444	7.82277	7.75395	7.58179	7.95491	7.81387	7.73834	8.05541	7.77064	7.94776	7.75683	7.52528	7.56335	7.68491	7.65911	7.65263
Mettl7a1	methyltransferase like 7A1	15	100135248	100144779	+	ENSMUSG00000054619	3.87112	13.2253	0.0638965	0.00175566	0.461887	-0.0267977	-0.00447897	0.0230398	9.09868	8.97951	9.14239	9.00212	9.16583	9.07921	9.44075	9.40514	9.53826	9.37003	9.58513	9.80036	9.07199	9.15005	8.87662	8.84067	9.00079	8.94371	8.96063	9.27088	9.39202	9.21291	9.31756	9.33181
Slc11a2	solute carrier family 11 (proton-coupled divalent metal ion transporters), member 2	15	100218329	100255503	-	ENSMUSG00000023030	2.42823	8.49446	0.135669	0.0088902	0.0256755	-0.0266931	-0.0110784	0.0666633	9.99319	10.1114	10.2029	9.9963	10.0854	10.0155	10.2128	10.3465	10.2009	10.047	10.1484	10.2809	9.97223	9.90554	10.094	9.97453	10.0408	9.96172	9.90111	10.0193	10.0188	10.1901	10.115	10.0704
Letmd1	LETM1 domain containing 1	15	100299465	100309683	+	ENSMUSG00000037353	0.0375473	0.598749	0.848412	0.448577	0.084918	-0.0167313	-0.00384244		10.1478	10.092	10.1424	10.2095	10.1483	10.1403	9.65629	9.783	9.54058	9.52849	9.53708	9.62565	10.1132	10.0075	10.1448	10.175	10.2906	10.0706	9.31502	9.55385	9.62613	9.55599	9.73506	9.60082
Csrnp2	cysteine-serine-rich nuclear protein 2	15	100310001	100325670	-	ENSMUSG00000044636	0.609592	2.30692	0.444561	0.145265	0.620714	-0.00540524	0.0146246	0.36233	9.68364	9.57721	9.67132	9.80726	9.68803	9.71188	9.06838	9.19722	9.05098	8.9812	8.97508	9.02985	9.87613	9.69668	9.78247	9.84067	9.87561	9.66292	8.92122	9.12619	9.12151	9.15362	9.10787	9.04537
Tfcp2	transcription factor CP2	15	100333227	100382378	-	ENSMUSG00000009733	0.0209902	0.0101694	0.886331	0.920731	0.00375988	-0.0166523	-0.00521939		8.51926	8.55421	8.51864	8.62787	8.50229	8.38189	8.95806	9.08746	8.98773	8.94221	8.9366	8.90728	8.52821	8.46873	8.46158	8.50082	8.68657	8.64079	8.73174	8.88518	8.96617	9.00497	9.09351	9.02158
Pou6f1	POU domain, class 6, transcription factor 1	15	100405749	100430415	-	ENSMUSG00000009739	0.113071	2.25875	0.74036	0.149301	0.11639	-0.0157694	-0.0127193	0.367544	12.4412	12.384	12.4531	12.4675	12.4397	12.4339	10.427	10.6073	10.4272	10.2299	10.5164	10.5377	12.2812	12.2867	12.2362	12.2482	12.3661	12.2406	10.2026	10.4462	10.3166	10.5251	10.6717	10.4788
C330013E15Rik	RIKEN cDNA C330013E15 gene	15	100444571	100445541	-	ENSMUSG00000090611	1.33907	4.15506	0.26154	0.0556738	0.299996	0.141276	-0.0359492	0.206542	4.73928	4.23228	4.29322	3.46297	4.16931	4.44777	4.04158	3.16993	2.58174	3.43046	2.99018	3.24194	4.06878	4.13375	4.58539	4.96025	4.77968	3.62583	3.74685	3.7559	3.67405	3.86821	3.82817	3.76334
Dazap2	DAZ associated protein 2	15	100446093	100451192	+	ENSMUSG00000000346	2.71445	1.59262	0.115882	0.222225	0.254402	-0.0120824	-0.01587	0.938284	11.5405	11.4822	11.5181	11.5418	11.4099	11.489	11.527	11.5275	11.441	11.676	11.5065	11.5491	11.3595	11.3128	11.3205	11.5078	11.4307	11.3583	11.2253	11.4148	11.4386	11.4443	11.4457	11.3993
Smagp	small cell adhesion glycoprotein	15	100451773	100467296	-	ENSMUSG00000053559	1.17532	2.67234	0.291876	0.118566	0.933538	-0.221609	0.040201	0.32484	4.19179	4.42492	4.20575	4.36986	4.63879	4.34086	4.52701	4.08746	3.25981	3.75238	4.21258	4.76551	4.06878	4.84424	4.42492	3.30818	4.36464	4.26326	0.576925	4.20335	4.46255	4.31567	4.29766	3.76334
Bin2	bridging integrator 2	15	100475214	100499933	-	ENSMUSG00000075411	1.88478	2.39463	0.18578	0.138248	0.185728	-0.0717478	-0.00416375	0.352807	6.13521	6.15284	6.68149	5.98653	6.16931	6.06668	6.04158	6.37504	5.90367	6.28844	6.40522	6.24194	6.14407	6.25928	6.48721	6.3588	6.62768	6.43319	4.38428	6.36255	6.25902	6.19014	6.52005	6.39137
Cela1	chymotrypsin-like elastase family, member 1	15	100504856	100518351	-	ENSMUSG00000023031	2.03884	0.114503	0.169557	0.738785	0.158392	0.0318264	0.0480365		4.88367	4.88435	5.45368	4.78489	4.99243	5.22538	6.47454	6.61471	6.40956	6.5802	6.63404	6.70138	5.43135	5.4292	5.09235	5.08578	5.15819	5.15635	6.55421	7.01071	6.55447	6.51731	6.41313	6.62583
Galnt6	UDP-N-acetyl-alpha-D-galactosamine:polypeptide N-acetylgalactosaminyltransferase 6	15	100522244	100559807	-	ENSMUSG00000037280	4.38794	0.109115	0.0498305	0.744769	0.433694	-0.0369258	-0.0200539		8.2529	8.03196	7.97394	7.93057	8.22375	7.79017	10.0431	9.97871	9.70688	9.94418	9.89105	9.93889	8.09431	7.6401	8.0379	8.1803	7.91719	7.63562	9.49579	9.55856	9.57657	9.66381	9.79307	9.5777
Slc4a8	solute carrier family 4 (anion exchanger), member 8	15	100592178	100654399	+	ENSMUSG00000023032	2.60673	3.58081	0.122896	0.0737896	0.021433	-0.0102768	-0.0264992	0.24589	11.6142	11.7614	11.8617	11.5819	11.6091	11.566	12.0181	11.9009	11.9869	11.5019	11.8616	11.9385	11.469	11.4056	11.4289	11.5473	11.4585	11.4692	11.5499	11.9865	12.0005	12.0354	11.9395	12.0017
Scn8a	sodium channel, voltage-gated, type VIII, alpha	15	100701114	100876360	+	ENSMUSG00000090536	2.18328	2.80678	0.155902	0.110247	0.711486	-0.0530413	0.028284	0.311667	5.91761	6.81724	6.52768	6.63289	6.87826	6.57116	6.13469	6.06609	5.78338	5.51792	6.16011	6.14883	6.67081	6.5323	6.60425	6.4781	6.72454	6.60566	4.74685	6.34086	5.94254	5.96337	5.96062	6.41243
Acvrl1	activin A receptor, type II-like 1	15	100958953	100975767	+	ENSMUSG00000000530	3.35931	1.26837	0.0825447	0.274097	0.195826	0.0184284	0.00991825	0.972381	8.30513	8.30757	8.3555	8.04039	8.14835	8.43483	8.34901	8.59246	8.34728	8.29464	8.54988	8.74577	8.50935	8.40903	8.29746	8.04772	8.27153	7.97947	8.28428	8.66715	8.80334	8.6231	8.42235	8.50358
Acvr1b	activin A receptor, type 1B	15	101004556	101043032	+	ENSMUSG00000000532	2.83236	2.50984	0.108743	0.129641	0.00388809	-0.0160836	-0.0039556	0.341837	11.3732	11.415	11.4929	11.3907	11.4231	11.2861	10.8098	10.8098	10.8782	10.5285	10.7361	10.8502	11.3823	11.337	11.4262	11.5169	11.4149	11.4692	10.4411	10.7773	10.7567	10.8161	10.8342	10.8964
A330009N23Rik	RIKEN cDNA A330009N23 gene	15	101051627	101054552	-	ENSMUSG00000087511	0.0181691	0.0366875	0.894193	0.850135	0.509621	-0.045567	0.0509136		8.13521	7.97182	7.92	7.95482	8.08358	7.96235	4.59412	4.64386	4.50774	4.75238	5.10566	4.56387	8.51881	8.42251	8.309	8.50082	8.43503	8.28246	3.38428	4.82003	4.91506	4.93234	4.98571	5.05879
Grasp	GRP1 (general receptor for phosphoinositides 1)-associated scaffold protein	15	101054638	101063186	+	ENSMUSG00000000531	0.295674	0.00200587	0.592931	0.964745	0.98982	-9.79924e-05	0.0486296		9.38313	9.37329	9.43937	9.20443	9.52956	9.52306	6.06543	6.22882	6.40956	6.28844	6.86465	6.48987	9.89442	9.91511	9.75742	9.43156	9.8565	9.6383	6.22078	6.17911	6.30209	6.33952	7.57067	6.41243
Nr4a1	nuclear receptor subfamily 4, group A, member 1	15	101097277	101105223	+	ENSMUSG00000023034	0.127519	4.35316	0.724954	0.0506567	0.659119	0.00753384	0.0892557	0.195528	11.0545	10.7057	10.8342	10.67	11.1378	11.0667	8.95167	8.88264	8.75167	8.88167	9.25697	9.25875	11.817	11.8685	11.8182	11.7553	11.9601	11.591	8.93007	8.76814	9.08807	9.45044	10.015	9.28975
9430023L20Rik	RIKEN cDNA 9430023L20 gene	15	101114732	101121365	+	ENSMUSG00000037204	2.16362	0.017948	0.157679	0.894835	0.364591	0.00698142	0.0330138		8.74401	8.72413	8.68149	8.75298	8.83081	8.72257	8.63454	8.76155	8.62176	8.57511	8.78892	8.69727	8.96533	8.92224	9.12536	8.80003	9.07981	8.69908	8.53112	8.64961	9.01875	8.6376	8.78594	8.81961
Krt1	keratin 1	15	101675859	101681217	-	ENSMUSG00000046834	0.538956	4.24952	0.471829	0.0532136	0.0451235	0.0230512	0.0306606	0.201422	5.07631	5.00988	4.37568	4.71089	4.55633	4.88835	6.17908	6.33985	5.93224	5.95402	6.10566	6.0493	4.84639	5.19788	4.86102	5.40771	5.66721	4.97947	6.00319	6.31883	6.55447	6.43115	6.63553	6.45365
Krt77	keratin 77	15	101689163	101700136	-	ENSMUSG00000067594	1.56966	0.00117359	0.225457	0.973029	0.326617	-0.544625	0.0230498		6.34933	5.78247	6.25015	6.32095	5.99243	6.13227	4.38262	4.39232	3.25981	5.23781	4.65315	3.82691	5.98934	6.28903	6.52728	6.4781	6.83279	6.62583	2.16189	3.10382	0.214623	2.40878	5.58716	3.11126
Eif4b	eukaryotic translation initiation factor 4B	15	101904204	101927603	+	ENSMUSG00000058655	0.27534	3.594	0.605841	0.0733035	0.0768439	-0.0158222	-0.00515657	0.244699	11.9832	12.0364	12.0215	11.988	11.8756	11.9769	11.9344	11.9784	11.8987	11.953	11.9165	11.9592	11.8729	11.9475	12.0349	12.0131	11.9935	11.9607	11.6651	11.7435	11.8362	11.8667	11.8947	11.7938
Tenc1	tensin like C1 domain-containing phosphatase	15	101933419	101946832	+	ENSMUSG00000037003	3.0311	8.65301	0.0978521	0.00837562	0.332934	-0.0477251	-0.0185222	0.064113	8.42799	8.64892	8.44416	8.18406	8.45755	8.32692	8.96758	9.37721	9.01136	8.96573	9.20935	9.21636	8.5046	8.36082	8.18295	8.00862	8.35257	8.45026	8.35828	8.75999	8.9323	8.83085	8.84883	8.99739
Spryd3	SPRY domain containing 3	15	101946959	101966665	-	ENSMUSG00000036966	1.80021	0.00031542	0.195503	0.986015	0.895192	0.000585923	0.0182366		11.6309	11.5848	11.6268	11.631	11.6838	11.6355	11.4662	11.5555	11.4441	11.3788	11.5416	11.6208	11.836	11.735	11.9068	11.698	11.8026	11.6672	11.315	11.5597	11.6112	11.634	11.6444	11.641
Igfbp6	insulin-like growth factor binding protein 6	15	101974793	101979942	+	ENSMUSG00000023046	0.00856204	3.90691	0.927245	0.0627864	0.090836	-0.240369	-0.0126908	0.221934	9.72975	9.54127	9.50037	9.52096	9.74499	9.93504	2.45662	3.90689	2.84478	4.82277	5.21258	5.7338	9.45372	9.40563	9.54691	9.34317	9.45211	9.33243	2.16189	2.29646	2.53655	2.73071	3.29766	2.30391
Csad	cysteine sulfinic acid decarboxylase	15	102007429	102019474	-	ENSMUSG00000023044	0.974044	9.27345	0.336076	0.00665908	0.0939075	-0.0575414	-0.0537081	0.0552209	8.5735	8.27041	8.20575	8.11402	8.35151	8.3199	8.32451	8.2384	8.32051	8.23781	8.2632	8.4514	7.86875	7.85422	7.98132	7.84067	8.24566	7.8653	7.35828	7.98995	8.10337	8.03083	8.43607	8.22872
Zfp740	zinc finger protein 740	15	102034079	102046037	+	ENSMUSG00000046897	0.16671	8.45481	0.687618	0.00902434	0.215665	0.00893369	0.0166515	0.0671789	10.5867	10.627	10.56	10.5974	10.5748	10.52	10.8787	10.9381	10.823	10.7569	10.9588	10.9091	10.7361	10.7658	10.801	10.7606	10.8425	10.7355	10.9201	11.0047	11.0066	11.0281	11.0819	11.0412
Itgb7	integrin beta 7	15	102046426	102062366	-	ENSMUSG00000001281	0.227597	0.311712	0.638753	0.583152	0.245779	-0.0623165	-0.125284		3.2987	3.23228	3.37568	2.04793	3.46887	3.64042	3.59412	4.16993	3.58174	3.23781	3.99018	3.56387	4.06878	2.25928	2.33746	2.82275	3.26511	2.45591	2.89885	3.61839	4.12151	3.86821	4.98571	4.2108
Rarg	retinoic acid receptor, gamma	15	102065369	102087948	-	ENSMUSG00000001288	0.479037	1.73186	0.497231	0.203831	0.93241	0.00435207	0.0271932	0.923092	7.58938	7.65374	7.48188	7.55043	7.68803	7.47331	7.42931	7.61471	7.2256	7.41914	7.28786	7.64282	7.71263	7.68554	7.94479	7.87586	7.58704	7.39842	7.35828	7.26225	7.746	7.80966	7.72019	7.30391
Mfsd5	major facilitator superfamily domain containing 5	15	102109887	102112175	+	ENSMUSG00000045665	6.38249	3.1766	0.0205634	0.0906885	0.268954	-0.0107946	0.00554193	0.278669	9.42799	9.49638	9.51637	9.38183	9.44328	9.5077	9.61851	9.76155	9.53128	9.49115	9.45779	9.52735	9.5046	9.5323	9.56146	9.43451	9.56366	9.4755	9.26692	9.61388	9.71845	9.52772	9.50927	9.65705
Espl1	extra spindle poles-like 1 (S. cerevisiae)	15	102126724	102154787	+	ENSMUSG00000058290	0.0514464	0.0403507	0.822988	0.842931	0.452009	0.0342438	0.0390395		4.66127	4.81724	4.29322	4.85528	4.71679	4.34086	3.59412	4.32193	4.34728	4.51792	4.10566	4.70138	4.90528	4.67432	4.72978	4.67075	3.45775	4.91534	4.27736	4.38393	4.02198	4.49625	4.71269	4.47383
Pfdn5	prefoldin 5	15	102156547	102162304	+	ENSMUSG00000001289	0.0838246	0.0110482	0.775316	0.91739	0.233189	-0.00734434	0.00140701		10.988	10.9465	10.8376	10.8932	10.7929	10.914	10.8742	10.9429	10.8531	11.0954	10.8676	10.9509	10.9934	10.8417	10.983	11.0413	10.9793	10.9746	10.6336	10.8199	10.9769	10.9159	11.0148	10.9892
Myg1	melanocyte proliferating gene 1	15	102162140	102168570	+	ENSMUSG00000001285	0.0455438	0.0834147	0.83328	0.77585	0.71674	0.00334882	-0.00836314		8.79627	8.88435	8.82509	8.58797	8.80032	8.83123	9.02121	9.14835	8.79924	8.93991	8.91749	9.14021	8.82053	8.70774	8.75578	8.64864	8.71561	8.47272	9.03225	8.90797	9.1189	9.0334	9.11713	8.87888
Aaas	achalasia, adrenocortical insufficiency, alacrimia	15	102168678	102181190	-	ENSMUSG00000036678	1.94707	1.3132	0.178999	0.266044	0.0474323	-0.0445224	0.00845506	0.967833	7.49135	7.59485	7.69761	7.45165	7.31436	7.35466	7.82119	8.11374	7.87452	7.72508	7.83148	7.76551	7.51881	7.68554	7.77209	7.64037	7.46898	7.58519	7.34511	7.70585	7.69844	7.72167	7.97948	7.77151
Sp7	Sp7 transcription factor 7	15	102187608	102196702	-	ENSMUSG00000060284	1.24506	26.1155	0.278412	6.22e-05	0.550627	0.197307	0.214886	0.00208597	4.19179	4.67285	3.90619	4.04793	3.9283	3.81034	6.42009	6.18982	5.90367	6.78801	6.65315	6.47076	4.90528	5.31817	5.29166	5.50082	4.91719	4.91534	7.00319	7.59108	7.57217	7.47487	7.2876	7.1368
Sp1	trans-acting transcription factor 1	15	102236574	102266835	+	ENSMUSG00000001280	0.685792	0.0397223	0.417881	0.844142	0.733538	-0.00357717	-0.00451165		9.39523	9.48291	9.54114	9.56625	9.49123	9.29863	9.83166	9.8009	9.71925	9.85672	9.85849	9.9179	9.38036	9.47522	9.43549	9.48382	9.35257	9.48382	9.75434	9.66497	9.82749	9.82452	9.80545	9.67241
Amhr2	anti-Mullerian hormone type 2 receptor	15	102275798	102285061	+	ENSMUSG00000023047	1.85475	5.59359	0.189162	0.0288193	0.702987	-0.189756	0.00124678	0.137897	2.49135	4.12536	3.79072	2.78489	4.37576	4.22538	5.17908	4.9542	4.65213	4.75238	5.10566	4.99683	3.43135	3.48167	3.50738	2.50082	4.36464	2.45591	2.89885	4.61839	4.46255	4.31567	4.58716	4.00435
Prr13	proline rich 13	15	102289459	102293237	+	ENSMUSG00000023048	2.75969	0.0933835	0.113079	0.763242	0.954514	8.20937e-05	0.0262292		9.21586	8.9524	9.0418	8.96281	9.10186	9.22913	10.2195	10.3443	10.1712	10.0229	10.0847	10.3228	9.25011	9.30002	9.37363	9.08202	9.37064	9.13187	9.99267	10.2823	10.4626	10.3989	10.2032	10.2153
Pcbp2	poly(rC) binding protein 2	15	102301063	102330490	+	ENSMUSG00000056851	0.147913	33.3056	0.704809	1.46e-05	0.601563	-0.0296183	-0.0268255	0.000727224	11.928	11.8639	11.8945	11.8574	11.8708	11.9183	12.2146	12.2149	12.1606	12.2776	12.1376	12.2515	11.5758	11.566	11.5872	11.6283	11.6362	11.5594	11.6223	11.9238	11.9602	11.8842	11.9252	11.8311
Map3k12	mitogen-activated protein kinase kinase kinase 12	15	102328080	102347495	-	ENSMUSG00000023050	1.41756	0.701105	0.248468	0.412822	0.667798	0.00324054	0.0099699		11.3862	11.3767	11.4078	11.3996	11.4333	11.4549	11.2849	11.3549	11.2907	11.108	11.2967	11.2621	11.4964	11.512	11.5029	11.5063	11.4983	11.3893	11.2622	11.4112	11.3671	11.3872	11.3509	11.3964
Tarbp2	TAR (HIV) RNA binding protein 2	15	102348623	102354107	+	ENSMUSG00000023051	0.00644706	0.792035	0.936843	0.384616	0.125457	0.00747048	-0.00265929		8.54663	8.44173	8.52317	8.45165	8.54033	8.09985	8.33926	8.68299	8.35785	8.06708	8.46592	8.47556	8.51881	8.3538	8.57108	8.38347	8.65743	8.42169	8.48382	8.55385	8.53204	8.7034	8.83854	8.50358
Atf7	activating transcription factor 7	15	102367074	102455852	-	ENSMUSG00000071584	1.7612	0.0145511	0.200203	0.905252	0.3969	-0.0687364	-0.109434		5.07631	4.81724	4.52768	5.16341	4.86118	4.09985	4.83513	4.90689	4.58174	4.33735	4.57515	5.41187	4.50935	4.67432	3.65939	4.50082	4.91719	4.45591	4.27736	4.94032	4.12151	4.49625	4.52005	4.55183
Atp5g2	ATP synthase, H+ transporting, mitochondrial F0 complex, subunit C2 (subunit 9)	15	102493299	102501478	-	ENSMUSG00000062683	0.0310692	5.7017	0.861951	0.027492	0.593978	0.0162568	0.0281686	0.133951	10.5547	10.4775	10.4067	10.6216	10.547	10.5139	10.563	10.7389	10.6019	10.717	10.665	10.7328	10.7473	10.6967	10.8805	10.6943	10.8586	10.6775	10.6402	10.8672	10.9151	10.8743	10.9672	10.8973
Calcoco1	calcium binding and coiled coil domain 1	15	102537210	102552609	-	ENSMUSG00000023055	1.6431	1.0436	0.215323	0.319818	0.177033	-0.000120776	0.0137957		10.3555	10.3197	10.4005	10.3287	10.5174	10.4381	10.327	10.5265	10.3083	10.3146	10.5111	10.5087	10.4974	10.5135	10.4935	10.2723	10.4732	10.3324	10.2262	10.4776	10.4542	10.4381	10.5147	10.3633
Smug1	single-strand selective monofunctional uracil DNA glycosylase	15	102983738	102988383	-	ENSMUSG00000036061	3.24836	2.20355	0.0873828	0.154095	0.273635	0.0104871	0.00382834	0.878456	8.65122	8.43055	8.74491	8.561	8.73565	8.68481	8.48342	8.42206	8.33128	8.43608	8.40522	8.48987	8.65374	8.58121	8.69061	8.40771	8.55579	8.65558	8.30485	8.53487	8.66171	8.38033	8.65521	8.41765
Cbx5	chromobox 5	15	103021975	103070247	-	ENSMUSG00000009575	0.263669	1.03351	0.61353	0.322107	0.18654	-0.0131709	-0.00318431		12.2471	12.1664	12.3555	12.3456	12.2806	12.2126	12.4958	12.3786	12.4613	12.3538	12.4101	12.4376	12.2575	12.2279	12.1664	12.2838	12.184	12.2856	12.2347	12.3188	12.2904	12.3814	12.3869	12.32
Hnrnpa1	heterogeneous nuclear ribonucleoprotein A1	15	103070945	103074445	+	ENSMUSG00000046434	0.519038	0.653939	0.480023	0.428718	0.780009	-0.0217211	0.0240953		10.3381	10.4717	11.0653	10.9568	10.8536	10.9362	11.141	11.1838	11.1113	10.6874	11.1155	11.0228	10.7789	10.9068	10.9574	10.8562	10.8349	10.4395	10.8335	10.9353	10.941	11.1503	11.098	10.9394
Copz1	coatomer protein complex, subunit zeta 1	15	103103349	103130296	+	ENSMUSG00000060992	0.148481	2.2219	0.704271	0.15248	0.6299	-0.00550412	0.0342635	0.87603	10.6309	10.7558	10.7244	10.7061	10.7144	10.6586	10.7457	10.7347	10.5862	10.8228	10.7584	10.784	11.0321	11.0795	11.0998	11.2565	11.1266	11.1177	10.4626	10.7321	10.6954	10.7751	10.7378	10.7249
Zfp385a	zinc finger protein 385A	15	103144326	103170517	-	ENSMUSG00000000552	2.46336	0.00413359	0.133033	0.949409	0.973714	0.00464971	0.0164901		10.5828	10.4417	10.5072	10.446	10.4926	10.58	11.4184	11.4924	11.2912	11.1117	11.3804	11.4702	10.7168	10.6995	10.6355	10.4637	10.8142	10.5085	11.2396	11.4931	11.6283	11.4889	11.4108	11.4931
Itga5	integrin alpha 5 (fibronectin receptor alpha)	15	103174717	103197179	-	ENSMUSG00000000555	0.0732666	0.638441	0.789557	0.434151	0.546484	-0.0149854	-0.0323906		6.13521	5.91678	5.76034	5.74837	6.14129	6.06668	6.20078	6.40939	6.1667	6.45282	6.5345	6.56387	5.50935	5.99624	5.72978	5.45502	5.66721	5.31389	6.40982	5.94032	6.14536	6.08121	7.11642	6.1368
Nckap1l	NCK associated protein 1 like	15	103284256	103329231	+	ENSMUSG00000022488	0.088078	1.40378	0.769855	0.250702	0.264731	0.0272314	-0.0173073	0.963654	8.4857	8.45283	8.32987	8.23775	7.97666	8.05827	7.84893	7.88874	7.71925	8.07431	7.76277	8.0233	8.27265	8.26677	8.29166	8.10815	8.46338	8.33855	8.06878	8.08437	7.94254	7.98621	8.16665	8.11769
Pde1b	phosphodiesterase 1B, Ca2+-calmodulin dependent	15	103333729	103360483	+	ENSMUSG00000022489	0.00033515	0.731279	0.985585	0.403124	0.159256	-0.00205155	0.0122049		11.6411	11.7092	11.7874	11.6279	11.6275	11.669	12.2448	12.3404	12.1014	12.3582	12.3046	12.1705	11.8821	11.8171	11.8674	11.8131	11.864	11.8129	12.0911	12.2619	12.2583	12.2926	12.836	12.486
Ppp1r1a	protein phosphatase 1, regulatory (inhibitor) subunit 1A	15	103360710	103368423	-	ENSMUSG00000022490	2.17211	3.75747	0.156909	0.0675744	0.126276	0.00105893	0.00534371	0.232734	10.7105	10.6023	10.5367	10.5741	10.5563	10.4875	9.23535	9.22159	8.96717	9.41345	9.12973	9.23063	10.6288	10.5991	10.7918	10.7042	10.9121	10.6955	9.14678	9.16991	9.13646	9.26987	9.554	9.35919

## Sheet: RNA seq B6J FeJ SWDlen CI
symbol	description	chr	start	end	strand	ensid	fstat genotype	fstat strain	unadj pval genotype	unadj pval strain	unadj pval strain x geno	% mut/wt thal	% mut/wt ssctx	FDR q val	B6J_wt_ssctx_a	B6J_wt_ssctx_b	B6J_wt_ssctx_c	B6J_mut_ssctx_g	B6J_mut_ssctx_h	B6J_mut_ssctx_i	B6J_wt_thal_a	B6J_wt_thal_b	B6J_wt_thal_c	B6J_mut_thal_g	B6J_mut_thal_h	B6J_mut_thal_i	FeJ_wt_ssctx_d	FeJ_wt_ssctx_e	FeJ_wt_ssctx_f	FeJ_mut_ssctx_j	FeJ_mut_ssctx_k	FeJ_mut_ssctx_l	FeJ_wt_thal_d	FeJ_wt_thal_e	FeJ_wt_thal_f	FeJ_mut_thal_j	FeJ_mut_thal_k	FeJ_mut_thal_l
Trps1	trichorhinophalangeal syndrome I (human)	15	50486307	50721587	-	ENSMUSG00000038679	0.0381527	0.795321	0.84721	0.383651	0.150005	0.00413017	-0.00888731		9.58146	9.37037	9.57862	9.50462	9.46887	9.54128	10.099	9.93517	10.0752	9.78581	9.7846	9.86033	9.52587	9.49768	9.25334	9.52873	9.39144	9.48933	10.0011	10.1278	10.1049	10.1519	10.0271	10.0571
Eif3h	eukaryotic translation initiation factor 3, subunit H	15	51618109	51697007	-	ENSMUSG00000022312	0.0103892	0.513708	0.919882	0.482256	0.585899	-0.012866	0.00454416		11.0402	11.1026	11.0473	11.0786	11.0416	11.0823	11.1906	11.3259	11.2045	11.3722	11.1425	11.2434	11.0246	11.1224	11.1939	11.1229	11.0789	10.9951	11.0199	11.1443	11.123	11.1967	11.2428	11.2603
Utp23	UTP23, small subunit (SSU) processome component, homolog (yeast)	15	51708975	51716160	+	ENSMUSG00000022313	0.185156	4.55842	0.671821	0.0459972	0.207548	-0.0344356	-0.00816186	0.183989	7.79513	7.66333	7.6487	7.63429	7.74462	7.86924	7.54408	7.3837	7.48863	7.48574	7.58513	7.68489	7.64513	7.60505	7.66838	7.83174	7.78166	7.69431	6.96924	7.2907	7.38455	7.42001	7.57067	7.46378
Rad21	RAD21 homolog (S. pombe)	15	51794151	51823306	-	ENSMUSG00000022314	1.16956	1.16619	0.293028	0.293703	0.505423	0.000405363	0.00126319	0.985183	11.6386	11.6011	11.7096	11.7656	11.6046	11.7371	12.1234	12.0637	12.0436	12.1244	12.0373	12.0685	11.6777	11.6212	11.6945	11.8092	11.7455	11.7812	12.0204	12.1278	12.0973	12.1414	12.0794	12.0293
Aard	alanine and arginine rich domain containing protein	15	51871653	51877267	+	ENSMUSG00000068522	0.583574	0.0912505	0.454297	0.765875	0.897623	-0.107532	0.0340844		5.2987	5.00988	5.06373	5.41716	5.27622	5.28427	5.45662	5.32193	5.8144	5.78801	5.5345	5.5995	5.47088	5.13375	5.29166	5.71028	4.70568	5.3628	4.48382	5.46639	4.85848	5.65671	4.98571	5.43319
Med30	mediator complex subunit 30	15	52544000	52561986	+	ENSMUSG00000038622	0.0354405	12.4028	0.852672	0.00227991	0.979354	-0.0578195	-0.0521794	0.027511	7.72017	7.79124	7.94722	7.63289	7.76349	7.79017	7.93559	8.01681	7.88187	8.30697	7.95981	8.06212	7.18029	7.55696	7.49733	7.48951	7.45775	7.32627	7.38428	7.54439	7.52751	7.7397	7.57067	7.3483
Ext1	exostoses (multiple) 1	15	52895593	53177714	-	ENSMUSG00000061731	0.0397085	1.62672	0.844169	0.217532	0.851522	0.00806147	-0.0293105	0.932625	10.374	10.303	10.4054	10.3788	10.3892	10.2459	8.52701	8.58871	8.52191	8.49115	8.69062	8.59067	10.0146	9.95972	10.197	10.0361	9.9007	10.1177	8.74685	8.52528	8.57217	8.54833	8.76798	8.58003
Samd12	sterile alpha motif domain containing 12	15	53293176	53734092	-	ENSMUSG00000058656	1.94338	6.25644	0.179392	0.0216815	0.294017	-0.105537	-0.0366494	0.11567	7.13521	6.96408	7.3453	7.09232	6.86118	7.25513	6.7494	6.52356	6.73555	6.04517	7.01993	6.74974	6.98934	6.82406	6.84525	7.00862	6.68657	6.9637	4.96924	6.56325	6.36437	6.40878	6.52005	6.39137
Tnfrsf11b	tumor necrosis factor receptor superfamily, member 11b (osteoprotegerin)	15	54082174	54110039	-	ENSMUSG00000063727	3.03314	1.9765	0.0977471	0.175902	0.842168	0.122095	-0.0565845	0.900204	6.55744	6.20628	6.25015	6.10682	5.9283	6.31284	4.30461	3.90689	3.96025	4.60038	4.49268	4.94238	6.01631	5.88377	6.0379	6.28218	6.01234	5.91534	4.82485	4.61839	4.21462	4.99374	4.82817	4.47383
Mal2	mal, T cell differentiation protein 2	15	54402921	54434401	+	ENSMUSG00000024479	0.925823	1.11525	0.348037	0.304188	0.338627	0.00858855	-0.00992783	0.992817	12.4665	12.52	12.5805	12.7233	12.5191	12.5645	11.0816	11.014	11.2198	11.2546	10.7781	10.945	12.4401	12.4116	12.3424	12.7185	12.5174	12.6142	11.1591	11.2773	11.1652	11.2064	11.1064	11.1827
Nov	nephroblastoma overexpressed gene	15	54577257	54585594	+	ENSMUSG00000037362	2.23579	5.25284	0.151273	0.0335033	0.950891	-0.126568	-0.000550674	0.151563	10.5289	10.4221	10.6764	10.3022	10.3637	10.3581	4.65825	4.64386	5.46927	4.88989	4.86465	7.23063	10.3003	10.4704	10.8393	10.2871	10.3064	10.426	3.89885	4.61839	4.38455	5.49625	4.21519	5.2108
Enpp2	ectonucleotide pyrophosphatase/phosphodiesterase 2	15	54670456	54751573	-	ENSMUSG00000022425	0.00381386	2.27165	0.951402	0.148207	0.406423	-0.0104158	-0.00942964	0.366059	12.5864	12.612	12.5691	12.5715	12.6454	12.5158	13.164	13.1023	13.0397	13.4092	13.2373	13.3287	12.5111	12.4953	12.4049	12.5709	12.4825	12.5061	12.6554	12.7958	13.4454	12.9982	12.8488	12.8243
Taf2	TAF2 RNA polymerase II, TATA box binding protein (TBP)-associated factor	15	54846684	54903707	-	ENSMUSG00000037343	3.53033	0.600985	0.0756858	0.447744	0.661625	0.00145262	0.00421418		9.69836	9.87613	9.7699	9.74141	9.71679	9.72788	9.63852	9.76321	9.75167	9.6902	9.70214	9.72978	9.86134	9.78545	9.82128	9.71757	9.68176	9.83745	9.61035	9.82003	9.76537	9.80325	9.78773	9.78369
Deptor	DEP domain containing MTOR-interacting protein	15	54943872	55090826	+	ENSMUSG00000022419	1.06092	0.209101	0.31594	0.652658	0.951639	0.0167715	-0.00729878		9.57871	9.9167	9.90952	9.99814	9.81072	9.95319	10.6444	10.6474	10.8789	10.3933	10.6036	10.6417	9.8706	9.65137	9.66833	9.73197	9.6623	9.74355	10.8658	10.9943	10.8503	10.8936	10.708	10.936
Col14a1	collagen, type XIV, alpha 1	15	55139305	55352358	+	ENSMUSG00000022371	1.04102	0.0130074	0.320401	0.910395	0.366627	-0.028342	0.0737949		4.66127	4.94848	5.59807	4.71089	5.11272	4.64042	4.52701	4.70044	4.58174	4.82277	4.21258	4.14883	5.54683	5.19788	5.58539	5.14468	5.36464	5.26326	3.74685	4.9969	4.67405	4.8011	4.71269	4.62583
Mrpl13	mitochondrial ribosomal protein L13	15	55365649	55389303	-	ENSMUSG00000022370	0.301343	0.0587044	0.589436	0.811152	0.730266	0.00108483	0.00113292		9.02285	8.87638	8.88833	8.9081	8.90878	8.88516	9.17084	9.31064	9.251	9.58904	9.25466	9.26428	8.90521	8.87379	9.0389	9.00536	8.96174	9.01704	9.13561	9.31911	9.30783	9.26499	9.23042	9.22202
Mtbp	Mdm2, transformed 3T3 cell double minute p53 binding protein	15	55388963	55457978	+	ENSMUSG00000022369	1.70155	0.866764	0.207666	0.363532	0.813373	-0.0282225	0.0339647		4.95078	5.06878	5.20575	4.9224	5.51326	4.64042	5.96758	6.24888	5.99208	6.38721	6.40522	6.19614	5.16976	5.53478	5.0379	5.31024	5.45775	4.26326	6.03636	5.68878	5.96951	6.21923	6.25701	6.18924
Sntb1	syntrophin, basic 1	15	55470398	55738504	-	ENSMUSG00000060429	4.68927	8.35225	0.0432834	0.009382	0.979607	-0.0279482	-0.116368	0.0685397	5.2987	5.33181	5.56331	4.46297	4.9283	5.03274	8.80711	8.87958	9.0147	8.44726	8.86874	9.01673	5.06878	3.99624	5.24435	4.74875	3.77968	4.3628	8.3971	8.83562	8.72242	8.36298	8.26216	8.65263
Has2	hyaluronan synthase 2	15	56497182	56526094	-	ENSMUSG00000022367	0.00700825	0.0328584	0.934159	0.858076	0.329009	-0.221514	-0.0668264		2.81328	3.42492	2.52768	3.27032	2.79079	0.640418	3.30461	2.58496	3.71925	3.60038	2.99018	2.82691	1.84639	2.99624	3.33746	3.50082	2.45775	2.45591	0.576925	2.88143	4.02198	3.21614	3.29766	2.88887
Derl1	Der1-like domain family, member 1	15	57701057	57723973	-	ENSMUSG00000022365	1.15539	8.94977	0.295884	0.0074996	0.835937	-0.0087821	-0.00405357	0.0594558	10.3321	10.3689	10.4667	10.4113	10.4172	10.43	10.8804	10.7855	10.8597	10.9579	10.7781	10.9493	10.3529	10.2742	10.4143	10.3604	10.3721	10.3733	10.6631	10.7773	10.7996	10.7925	10.7824	10.7948
Wdr67	WD repeat domain 67	15	57743754	57801622	+	ENSMUSG00000022364	0.010208	0.628151	0.920582	0.437819	0.684221	0.0213953	0.0479053		7.09126	7.11142	7.32469	7.33333	7.27622	7.13227	6.91605	6.75489	6.65213	6.98504	7.04908	7.19614	7.43135	7.6401	7.48721	7.33371	7.58704	7.65558	6.72667	7.34086	6.69036	7.05264	7.21519	7.22277
9130401M01Rik	RIKEN cDNA 9130401M01 gene	15	57860509	57907980	-	ENSMUSG00000022362	0.768828	3.39926	0.391532	0.0808798	0.460116	-0.0195114	0.00921668	0.260151	8.79189	8.72046	8.92405	8.86004	8.86324	8.99401	8.41147	8.41827	8.56902	8.66451	8.52525	8.4957	8.9962	8.84654	8.83731	8.77257	8.96182	8.91984	8.07677	8.36862	8.4578	8.28573	8.50433	8.25338
Zhx1	zinc fingers and homeoboxes 1	15	57878572	57908096	-	ENSMUSG00000022361	6.47e-06	10.2839	0.997997	0.00464233	0.137827	-0.0211207	-0.0227675	0.0446652	10.9556	10.9285	10.9894	11.0403	10.8873	10.8965	10.9135	10.8391	10.9321	10.9529	10.9118	10.8638	10.731	10.6751	10.719	10.866	10.6901	10.8652	10.4838	10.7832	10.7274	10.6987	10.7972	10.7734
Atad2	ATPase family, AAA domain containing 2	15	57925602	57966637	-	ENSMUSG00000022360	0.595223	7.74e-05	0.449896	0.993074	0.48287	-0.0114471	-0.0206487		8.6309	8.70745	8.66519	8.9387	8.49123	8.42832	6.65825	6.59991	6.7851	6.65927	6.95981	6.79638	8.28933	8.67994	8.49733	8.95203	8.65256	8.618	6.72667	6.7414	6.34576	6.34377	6.93509	6.69622
Wdyhv1	WDYHV motif containing 1	15	57972991	57990209	+	ENSMUSG00000022359	0.429111	3.06145	0.520278	0.0963042	0.944927	-0.0231523	-0.00182947	0.287537	8.6411	8.36156	8.47254	8.53443	8.55101	8.51694	8.50973	8.46352	8.29324	8.60038	8.44414	8.63855	8.45618	8.41578	8.55663	8.3146	8.44644	8.63582	7.80574	8.46639	8.40938	8.37457	8.46312	8.3646
Fbxo32	F-box protein 32	15	58011634	58046433	-	ENSMUSG00000022358	0.754675	2.56592	0.395841	0.125685	0.566607	0.031627	0.00944114	0.336636	8.86191	8.78247	8.88516	9.04039	8.83072	8.67934	8.48779	8.63652	8.3418	8.54924	8.64362	8.76146	8.7491	8.75102	9.27989	9.04382	8.83687	8.89873	8.87155	8.65402	8.74597	9.01589	8.73117	8.55652
Klhl38	kelch-like 38 (Drosophila)	15	58146128	58155724	-	ENSMUSG00000022357	1.71392	1.30661	0.20609	0.267208	0.738888	-0.0255869	0.0692909	0.968249	4.74836	4.38284	5.586	5.53207	4.24392	4.90195	4.92859	4.7761	4.43454	4.55644	5.21258	4.95948	4.99803	5.25988	5.47906	5.36625	4.92764	4.60972	3.16189	5.35218	5.26338	3.9411	5.1403	5.11384
D15Ertd621e	DNA segment, Chr 15, ERATO Doi 621, expressed	15	58247023	58289356	+	ENSMUSG00000037119	0.00583572	0.0583435	0.939906	0.811721	0.311765	-0.00631533	0.0022477		11.0257	10.8905	11.0661	11.0489	11.0071	11.0002	11.0431	11.0478	11.0371	10.9946	11.0785	10.9767	11.0575	11.0385	10.9604	11.0707	10.9315	11.1354	10.8977	11.0201	11.0009	11.0372	11.0241	11.0861
Gm20712	predicted gene 20712	15	58612016	58613506	-	ENSMUSG00000093677	0.0102683	0.298476	0.920348	0.591198	0.327263	0.00949099	-0.0210794		6.53574	6.78247	6.94722	6.55043	6.35151	6.4984	6.52701	6.06609	6.42974	6.36119	5.99018	6.30803	6.50935	6.6516	6.67731	6.71028	6.70568	6.58519	6.74685	6.15444	6.30209	6.24167	6.29766	6.16189
Tmem65	transmembrane protein 65	15	58613824	58655085	-	ENSMUSG00000062373	0.0296426	0.00584815	0.865124	0.939842	0.0365718	0.00044541	-0.0176036		11.7991	11.7951	11.8523	11.7414	11.5826	11.5924	11.624	11.5187	11.5974	11.5954	11.294	11.4416	11.5985	11.6058	11.6182	11.7926	11.6308	11.7896	11.4488	11.6617	11.6451	11.5387	11.4525	11.4956
Trmt12	tRNA methyltranferase 12 homolog (S. cerevisiae)	15	58704204	58708336	+	ENSMUSG00000037085	1.36657	0.255191	0.256861	0.619253	0.543012	-0.00236103	0.0118586		7.77675	7.97951	8.05124	8.10682	7.8439	7.85959	7.82119	7.86419	7.71925	7.86508	7.73614	7.7811	7.89078	8.18211	8.01694	8.00067	8.05021	8.12125	7.56561	7.90379	7.87996	7.7397	7.90252	7.95496
Rnf139	ring finger protein 139	15	58720784	58733945	+	ENSMUSG00000037075	0.595052	0.00541108	0.44996	0.942129	0.815078	-0.0113444	0.00211464		9.47434	9.55678	9.53443	9.63289	9.60842	9.4574	9.61447	9.51175	9.62395	9.78139	9.55751	9.43916	9.53987	9.51981	9.56628	9.52041	9.52384	9.67266	9.39391	9.53008	9.50003	9.44496	9.58306	9.35376
Tatdn1	TatD DNase domain containing 1	15	58721708	58765285	-	ENSMUSG00000050891	0.0482332	0.688315	0.828509	0.41704	0.192218	-0.0357885	-0.046969		6.59987	6.2829	7.05124	6.48533	6.42306	6.4984	6.7346	6.2854	6.79897	6.95402	6.59504	6.35047	6.34889	6.28903	6.35983	6.89314	6.26511	6.58519	5.74685	6.7559	6.60694	6.67557	6.46758	6.67895
Ndufb9	NADH dehydrogenase (ubiquinone) 1 beta subcomplex, 9	15	58765365	58771044	+	ENSMUSG00000022354	0.544568	0.561606	0.469563	0.462792	0.126964	-0.00934891	-0.00166545		11.5534	11.3849	11.344	11.4121	11.2866	11.3146	11.5578	11.6216	11.5066	11.689	11.3455	11.4665	11.4457	11.3064	11.4732	11.4795	11.5558	11.446	11.3243	11.4532	11.5842	11.4909	11.472	11.472
Mtss1	metastasis suppressor 1	15	58772799	58913581	-	ENSMUSG00000022353	0.0220174	0.394656	0.883604	0.537341	0.148544	-0.00846345	0.0026658		9.37093	9.24191	9.14827	9.13185	9.2137	8.9533	10.9396	10.9766	11.0046	10.9072	10.9209	10.996	9.12561	9.36082	9.34869	9.26237	9.22263	9.20745	10.7973	10.9873	10.8576	11.0499	10.9834	10.9195
Sqle	squalene epoxidase	15	59146632	59162747	+	ENSMUSG00000022351	0.254464	0.880636	0.619749	0.359805	0.0412638	-0.0163046	-0.0261108		10.4221	10.5071	10.4643	10.4215	10.4375	10.1601	11.0536	10.8811	10.8671	10.9638	10.8961	10.7782	10.1486	10.1378	10.2873	10.2838	10.2619	10.1389	10.6295	10.823	10.8145	10.8032	10.9367	10.9869
E430025E21Rik	RIKEN cDNA E430025E21 gene	15	59163552	59205707	-	ENSMUSG00000022350	1.86424	6.48811	0.188085	0.0196765	0.986867	-0.0150893	0.000510212	0.108582	10.0498	10.1149	10.2378	10.1686	10.1762	10.162	10.2717	10.2738	10.2752	10.2681	10.2909	10.1801	10.1683	10.1358	10.1139	10.0342	10.1106	10.0925	9.96924	10.107	10.2794	10.2048	10.1543	10.1942
Nsmce2	non-SMC element 2 homolog (MMS21, S. cerevisiae)	15	59205753	59433238	+	ENSMUSG00000059586	15.951	9.02812	0.000777	0.00728578	0.440526	-0.00264882	0.010279	0.0585948	8.67622	8.63438	8.60663	8.87236	8.79978	8.69027	9.27424	9.21675	9.21692	9.35823	9.26009	9.35047	8.91606	8.6401	8.62748	8.87151	8.84577	8.82223	9.24226	9.20035	9.1919	9.31868	9.2876	9.10157
Trib1	tribbles homolog 1 (Drosophila)	15	59479905	59488105	+	ENSMUSG00000032501	0.693859	0.0421935	0.415204	0.839436	0.579954	-0.018478	0.0627547		9.24624	8.84277	9.09145	9.08502	9.30492	9.12423	9.17908	8.74147	9.0346	8.42481	9.19964	9.09992	9.72495	9.70222	9.45899	9.61196	9.82408	9.62834	8.41613	8.99343	9.04751	8.92448	8.9383	9.2869
Fam84b	family with sequence similarity 84, member B	15	60650551	60656635	-	ENSMUSG00000072568	0.00904486	0.266384	0.925228	0.611723	0.879217	-0.0299931	0.015606		7.85618	7.75987	7.74367	7.78426	7.64619	7.6512	7.86655	8.11525	8.13897	8.29111	8.31019	8.23601	7.96553	7.82994	7.92879	8.06566	7.9792	8.16919	7.42942	7.91029	8.0576	7.8623	8.14365	7.52723
9930014A18Rik	RIKEN cDNA 9930014A18 gene	15	60654520	60662955	+	ENSMUSG00000044513	0.91858	0.124888	0.349886	0.727683	0.544043	-0.0113892	-0.0460371		5.74572	5.9963	5.21295	5.71355	5.87009	5.85143	4.96352	5.48253	5.19386	5.04928	5.17711	5.15124	5.28246	5.02623	5.86572	5.98173	5.42446	5.36952	5.06493	5.25623	5.14062	5.64604	5.6563	4.73486
Myc	myelocytomatosis oncogene	15	61816946	61821929	+	ENSMUSG00000022346	4.49176	0.753881	0.0474545	0.396085	0.169688	0.068897	0.0333378		5.88367	6.06878	6.06373	5.82052	5.9283	5.88835	5.13469	5.64386	5.75167	5.88989	5.92878	5.76551	6.16831	6.06663	6.38185	5.82275	6.07246	6.33855	6.00319	5.54439	6.12151	5.65671	5.93509	5.79576
Pvt1	plasmacytoma variant translocation 1	15	61869542	62082530	+	ENSMUSG00000072566	0.425982	0.415185	0.521787	0.527053	0.819244	-0.0229728	0.020418		6.66127	6.94848	7.10057	7.07768	6.75427	6.96235	6.61042	6.88264	6.68608	6.65927	6.78026	6.79653	7.19216	6.95972	6.98132	7.18732	6.91719	7.09977	6.06878	6.94032	6.70648	6.78382	6.66689	6.57069
Fam49b	family with sequence similarity 49, member B	15	63760652	63892010	-	ENSMUSG00000022378	0.256313	0.00121141	0.618489	0.972598	0.0390054	-0.0142367	-0.00680795		11.888	11.9421	12.0379	11.9523	11.8121	11.9327	11.8386	11.8529	11.8764	11.9831	11.6316	11.6072	11.9488	11.8411	11.8338	12.019	11.9426	12.0143	11.5635	11.7472	11.7509	11.8049	11.7085	11.7265
Asap1	ArfGAP with SH3 domain, ankyrin repeat and PH domain1	15	63918419	64214481	-	ENSMUSG00000022377	2.2241	6.25813	0.152289	0.021666	0.62508	-0.0166959	-0.00126359	0.115654	12.3648	12.4235	12.5212	12.5757	12.547	12.6597	11.3968	11.4564	11.3611	11.1498	11.2389	11.3596	12.4301	12.4284	12.4039	12.486	12.4246	12.4014	11.0011	11.3313	11.3107	11.2876	11.2277	11.3235
Adcy8	adenylate cyclase 8	15	64530604	64753858	-	ENSMUSG00000022376	1.09447	0.020477	0.30861	0.88772	0.756502	-0.0054649	0.0130734		9.71776	9.28601	9.56331	9.50736	9.33923	9.26247	10.9668	11.1189	11.2009	11.0173	10.9347	11.1616	9.59681	9.69112	9.65261	9.52873	9.65005	9.50303	10.8378	11.1222	11.1446	11.018	10.8726	11.0555
Efr3a	EFR3 homolog A (S. cerevisiae)	15	65618596	65705378	+	ENSMUSG00000015002	1.636	2.18923	0.216276	0.155369	0.688013	-0.000319632	-0.00667841	0.880441	12.2154	12.2323	12.3453	12.3479	12.2702	12.4007	11.6519	11.5594	11.6607	11.4283	11.5203	11.574	12.2043	12.1707	12.1723	12.3498	12.1638	12.2757	11.4388	11.7011	11.7209	11.6207	11.4814	11.5806
Kcnq3	potassium voltage-gated channel, subfamily Q, member 3	15	65826733	66117786	-	ENSMUSG00000056258	10.4928	12.6347	0.00431666	0.00211636	0.910972	-0.0198567	-0.0157638	0.0261184	10.4072	10.54	10.6936	10.4909	10.5669	10.5637	10.287	10.242	10.5647	9.42481	10.3507	10.4231	10.3699	10.4039	10.3681	10.2507	10.0465	10.2454	9.79124	10.3258	10.3593	10.0953	9.9383	10.2435
Lrrc6	leucine rich repeat containing 6 (testis)	15	66211420	66332472	-	ENSMUSG00000022375	0.104843	1.56095	0.74963	0.226699	0.372493	-0.108658	-0.0565076	0.942966	6.88367	6.94848	6.96064	7.07768	6.82642	6.52306	4.13469	3.45943	4.42974	4.60038	4.10566	4.32941	6.50935	6.58121	6.52728	7.00862	6.81531	6.83095	2.57693	3.7559	4.38455	3.57871	5.08193	3.76334
Tmem71	transmembrane protein 71	15	66357774	66392608	-	ENSMUSG00000036944	0.0304788	0.739077	0.863255	0.400674	0.965169	0.0249749	-0.272018		4.07631	2.42492	4.29322	2.78489	3.63879	3.64042	4.22215	3.58496	3.71925	3.88989	3.86465	4.24194	3.26142	2.25928	2.33746	2.50082	3.91719	4.04087	4.03636	4.10382	3.67405	3.86821	2.12773	3.11126
Phf20l1	PHD finger protein 20-like 1	15	66409128	66473502	+	ENSMUSG00000072501	0.1223	0.114055	0.730399	0.739276	0.0238039	-0.0143896	0.00390989		9.27271	9.49906	9.46785	9.41133	9.3996	9.24033	8.7929	8.56605	8.60411	8.10288	8.73165	8.55483	9.38036	9.43254	9.53713	9.65311	9.54787	9.5592	8.42867	8.68878	8.47201	8.68955	8.97322	8.62583
Sla	src-like adaptor	15	66612381	66663391	-	ENSMUSG00000022372	0.557911	0.896384	0.464247	0.35564	0.194762	0.0982546	-0.0133338		7.42209	7.15284	7.50953	7.32095	7.03872	7.06668	5.62654	6	6.06717	5.88989	5.99018	5.66821	7.21562	7.4425	7.13188	7.3588	7.172	7.57485	6.06878	6.73941	6.62401	6.59861	6.74244	6.74685
Wisp1	WNT1 inducible signaling pathway protein 1	15	66722882	66754763	+	ENSMUSG00000005124	0.701407	2.70026	0.412723	0.116778	0.236122	-0.142792	-0.217287	0.32238	7.32424	6.37912	6.96064	6.29586	7.27622	7.01546	4.59412	4.58496	4.06717	4.67838	4.57515	4.0493	5.39071	5.92224	4.86102	5.71028	6.18567	6.23727	3.38428	3.7559	4.21462	4.65671	3.82817	3.62583
Ndrg1	N-myc downstream regulated gene 1	15	66760883	66801202	-	ENSMUSG00000005125	0.595937	0.105178	0.449629	0.749246	0.039112	-0.00146142	0.00182283		10.8696	10.7378	10.6414	10.6228	10.8109	10.7952	12.6278	12.4668	12.3269	12.6101	12.7456	12.7917	10.8771	10.6869	10.7437	10.6993	10.5909	10.4797	12.4185	12.4183	12.5301	12.435	12.4446	12.4875
St3gal1	ST3 beta-galactoside alpha-2,3-sialyltransferase 1	15	66934437	66945922	-	ENSMUSG00000013846	4.55224	17.7155	0.0461302	0.00047548	0.994596	-0.0400142	-0.0289025	0.00945483	9.34622	9.25464	9.47955	9.10682	9.24365	9.2588	9.08013	9.13699	9.1053	9.15155	9.29092	9.17563	8.99613	8.95509	9.3176	8.94377	8.92536	8.95176	8.29117	8.9618	8.97617	8.92054	8.70893	8.87755
Zfat	zinc finger and AT hook domain containing	15	67915328	68090418	-	ENSMUSG00000022335	3.17404	1.07161	0.0908089	0.31358	0.13612	-0.0421763	0.0365418	0.997605	6.49135	7.29529	7.21698	6.97076	6.97666	7.03274	6.82119	7.15987	6.90367	6.45282	6.86465	6.8118	7.14407	7.15005	7.47701	7.02438	7.27793	7.09977	6.38428	6.82003	6.79959	7.2032	7.19382	6.94776
Khdrbs3	KH domain containing, RNA binding, signal transduction associated 3	15	68758850	68923942	+	ENSMUSG00000022332	0.521483	6.42643	0.479004	0.0201891	0.00544547	-0.0134804	4.11407e-05	0.110209	11.8059	11.7161	11.7642	11.9224	11.8536	12.062	11.0654	10.9084	11.0493	11.0734	10.885	11.1473	11.7835	11.6778	11.8263	11.7464	11.6075	11.6439	10.7803	10.8366	10.9611	10.6976	10.5748	10.7218
Fam135b	family with sequence similarity 135, member B	15	71276108	71558268	-	ENSMUSG00000036800	2.49368	5.11156	0.130808	0.0356945	0.580853	0.00732209	-0.0137175	0.157683	9.06878	9.31671	9.33246	9.36081	9.67344	9.48591	7.91605	7.81378	7.77551	7.37297	8.06343	8.19031	9.18624	8.92224	9.22924	9.14468	9.12309	9.17016	7.68545	7.98296	8.00904	7.91658	8.05254	7.99739
Col22a1	collagen, type XXII, alpha 1	15	71626225	71864657	-	ENSMUSG00000079022	0.0152876	1.61067	0.902897	0.219725	0.886412	0.112107	0.0710737	0.936619	5.81328	5.06878	5.25015	5.21785	5.42306	5.09985	3.83513	4.32193	2.84478	3.01542	3.99018	4.14883	5.68769	5.76178	5.82931	5.3588	5.54522	5.74131	4.74685	3.46639	4.02198	4.21614	4.03462	4.69622
Kcnk9	potassium channel, subfamily K, member 9	15	72342549	72376709	-	ENSMUSG00000036760	2.48564	3.80411	0.131394	0.066036	0.424867	-0.0277772	-0.0265002	0.229435	7.90074	8.27041	8.20011	7.87236	8.3996	7.98915	7.11197	7.45121	7.1053	6.53898	7.66261	7.16081	7.92676	7.88377	7.91489	7.85837	7.80648	7.94776	6.40982	7.47637	7.18041	7.32765	7.20455	7.38072
D15Mit105	marker	15	72331040	72331161	marker	marker	marker	marker	marker	marker	marker	marker	marker	marker
D15Mit93	marker	15	72370100	72370243	marker	marker	marker	marker	marker	marker	marker	marker	marker	marker
Trappc9	trafficking protein particle complex 9	15	72420051	72891634	-	ENSMUSG00000047921	0.503749	1.20075	0.486478	0.286869	0.907601	-0.00548773	-0.0043135	0.980332	10.522	10.5124	10.4854	10.5518	10.5092	10.4984	10.8203	10.825	10.7517	10.6264	10.7628	10.8109	10.4926	10.4491	10.4421	10.3666	10.3885	10.2274	10.5684	10.761	10.8897	10.8382	10.7761	10.9057
Chrac1	chromatin accessibility complex 1	15	72920822	72927984	+	ENSMUSG00000068391	0.0321662	0.233354	0.859562	0.634568	0.269305	-0.0128932	-0.0273209		7.6411	7.80863	7.50037	7.63289	7.64877	7.57116	7.75674	7.8009	7.53594	7.78801	7.49268	7.5995	7.53755	7.2289	7.55663	7.51205	7.36464	7.7133	7.27736	7.82003	7.69844	7.8011	7.61155	7.7133
Eif2c2	eukaryotic translation initiation factor 2C, 2	15	72932055	73015377	-	ENSMUSG00000036698	6.99362	7.62421	0.0159869	0.0124294	0.790642	-0.00945775	-0.00178968	0.0821343	11.008	11.2177	11.3162	11.1167	11.3944	11.4291	11.6474	11.5599	11.6332	11.0461	11.6262	11.6745	11.248	11.145	11.089	10.9846	11.019	11.2058	11.2208	11.672	11.6182	11.5992	11.6523	11.6515
Ptk2	PTK2 protein tyrosine kinase 2	15	73035535	73253621	-	ENSMUSG00000022607	0.482317	12.6795	0.49578	0.00208626	0.246066	-0.0144646	-0.0143678	0.0259365	11.8133	12.0099	12.0091	12.0804	12.0321	12.1825	10.8027	10.9114	10.8325	10.8557	10.7628	10.8184	11.7752	11.7255	11.8167	11.825	11.6346	11.7459	10.6295	10.6877	10.7586	10.7114	10.7089	10.6224
Dennd3	DENN/MADD domain containing 3	15	73342990	73402672	+	ENSMUSG00000036661	1.10275	0.513524	0.306837	0.482334	0.899687	0.0262817	0.037066		7.39824	7.31974	7.42492	7.07768	7.19679	7.21027	6.80711	7.01123	6.66921	6.83985	6.79754	7.30803	7.5652	7.6516	7.74685	7.51205	7.25217	7.5003	7.10049	6.98296	6.94254	7.02349	7.25701	7.1368
Slc45a4	solute carrier family 45, member 4	15	73407854	73476192	-	ENSMUSG00000079020	8.56264	3.34424	0.00866469	0.083183	0.138704	-0.00531264	0.00220801	0.264598	10.7032	10.8354	10.8415	10.6846	10.7543	10.7684	11.1005	11.1743	11.0736	10.8588	10.956	10.9993	10.816	10.7658	10.8698	10.7042	10.7581	10.7924	10.7368	11.1443	11.2901	11.1469	11.0607	11.1957
Ptp4a3	protein tyrosine phosphatase 4a3	15	73553575	73589196	+	ENSMUSG00000059895	5.28516	1.57793	0.0330237	0.224286	0.559511	-0.00681705	0.00696302	0.940678	9.9832	10.1765	10.1096	9.90383	10.1109	10.0067	9.82818	10.0471	9.84853	9.75238	9.74952	9.79845	10.1728	10.148	10.1592	9.9623	10.1992	9.92148	9.68545	9.92764	9.90811	9.69649	9.91563	9.92229
Gm628	predicted gene 628	15	73591840	73670129	-	ENSMUSG00000072487	0.393453	0.00356485	0.537956	0.953013	0.254688	-0.00088074	-0.00736568		5.9832	5.42492	5.72932	5.37896	5.79079	5.4984	5.17908	4.75489	4.84478	4.23781	5.04908	4.63426	5.61898	5.62851	5.76372	5.96025	5.81531	5.54337	4.38428	5.46639	4.91506	4.65671	5.12773	5.00435
Gm3244	predicted pseudogene 3244	15	73639937	73640326	-	ENSMUSG00000083380	0.544774	1.70135	0.46948	0.207692	0.518134	-0.0255816	0.00664417	0.925879	9.37948	9.3011	9.3911	9.35809	9.40279	9.23478	9.45975	9.64618	9.44355	9.54136	9.38462	9.52684	9.26873	9.39453	9.59494	9.40774	9.37112	9.44513	9.24648	9.30481	9.26784	9.34236	9.25779	9.44989
Gm15387	predicted gene 15387	15	73924116	73924763	-	ENSMUSG00000082585	1.71028	95.7901	0.206553	7.43e-09	0.804179	-0.135006	-0.107636	1.68213e-06	10.1504	9.99664	10.2564	10.3893	10.1338	10.1896	9.97991	10.07	10.0179	10.287	9.99798	9.98647	8.73224	9.20663	9.19202	8.92318	9.1526	9.03175	8.31333	8.79822	8.89699	8.53884	8.92354	8.86302
Bai1	brain-specific angiogenesis inhibitor 1	15	74346626	74419873	+	ENSMUSG00000034730	4.16237	20.7952	0.055479	0.00021391	0.602936	-0.0329222	-0.0162957	0.00532068	13.3472	13.3358	13.4192	13.32	13.578	13.4926	13.3388	13.5844	13.3952	13.0797	13.3042	13.3536	13.1741	13.0882	13.1863	12.9674	13.2578	13.0038	12.7324	13.0947	13.1639	13.1256	13.0425	13.0844
Arc	activity regulated cytoskeletal-associated protein	15	74499513	74503000	-	ENSMUSG00000022602	0.206369	1.45281	0.654776	0.242876	0.421352	-0.00379512	0.10014	0.955101	13.5351	12.1861	13.0865	12.8588	13.8375	13.3053	10.0654	9.8933	9.61737	10.22	10.5033	10.2178	14.311	14.2763	14.1065	14.0073	14.4427	14.1835	9.77414	9.71853	9.97118	9.77292	10.4875	9.82354
Jrk	jerky	15	74532842	74539965	-	ENSMUSG00000046380	1.65955	0.976953	0.213132	0.335373	0.389449	0.00352513	-0.00892918		7.71892	7.94848	7.83402	7.78462	7.78175	7.99744	7.54408	7.88874	7.49736	7.32527	7.51374	7.81937	7.73675	7.663	7.89182	7.9017	7.77914	7.73203	7.34511	7.86632	7.79959	7.96337	7.72764	7.73017
4930572J05Rik	RIKEN cDNA 4930572J05 gene	15	74551664	74554803	+	ENSMUSG00000056665	3.13444	2.48572	0.0926986	0.131388	0.821365	-0.00198429	0.00499551	0.34391	10.3099	10.2499	10.2892	10.2212	10.3847	10.37	10.1105	10.2621	10.0063	9.95598	10.0917	10.2588	10.3699	10.3128	10.3205	10.0951	10.3266	10.1581	9.69327	10.2434	10.382	10.2048	10.2165	10.2108
Lynx1	Ly6/neurotoxin 1	15	74578286	74583409	-	ENSMUSG00000022594	3.01354	1.00452	0.0987609	0.328813	0.924008	-0.000879891	0.00158596		13.9393	13.9255	13.963	13.917	13.9595	13.9362	14.0131	14.0526	13.9818	13.8606	13.8568	13.8775	13.9738	13.9264	13.994	13.883	13.9448	13.8381	13.7154	14.0645	14.2306	13.9949	13.8759	13.9453
Ly6e	lymphocyte antigen 6 complex, locus E	15	74785481	74790335	+	ENSMUSG00000022587	2.01592	29.9231	0.171857	2.81e-05	0.232462	-0.0642412	-0.025526	0.00115377	12.498	12.3957	12.5012	12.4513	12.5553	12.6621	11.1893	11.3247	11.1508	11.1318	11.1297	11.3307	12.1981	12.0964	12.146	12.0312	12.1655	11.9765	10.2008	10.5217	10.7797	10.3469	10.3323	10.3263
Ly6a	lymphocyte antigen 6 complex, locus A	15	74825308	74828064	-	ENSMUSG00000075602	0.0147637	55.748	0.904566	4.6e-07	0.183876	-0.207241	-0.318206	4.50859e-05	8.87073	8.73781	8.66519	8.43451	8.45755	8.58879	8.8455	9.09011	8.91087	8.74787	8.72715	9.17268	5.98934	6.03187	5.89205	6.30818	5.94961	5.91534	7.29117	6.78832	7.20331	7.47487	7.25701	7.49373
Ly6c1	lymphocyte antigen 6 complex, locus C1	15	74875447	74879260	-	ENSMUSG00000079018	1.70924	0.53659	0.206685	0.47279	0.277742	-0.00695732	0.000557321		9.50816	9.57711	9.48884	9.25087	9.40844	9.43808	9.80357	9.90689	9.66921	9.58256	9.70204	9.9424	9.58376	9.53804	9.46824	9.5329	9.64285	9.4521	9.46143	9.8371	9.87674	9.82573	9.5967	9.78546
Ly6h	lymphocyte antigen 6 complex, locus H	15	75381698	75397685	-	ENSMUSG00000022577	0.510518	1.43399	0.483602	0.245841	0.267929	-0.0297379	0.000128229	0.958616	10.5068	10.5835	10.6341	10.4559	10.5537	10.3836	10.2035	10.4909	10.1772	10.3612	10.3016	10.3121	10.4794	10.4158	10.8333	10.3194	10.5999	10.4989	10.0302	10.0811	9.84216	10.0327	10.6562	10.4072
Zfp41	zinc finger protein 41	15	75447109	75455730	+	ENSMUSG00000047003	0.326732	0.0500276	0.574291	0.825403	0.678096	0.0019269	-0.00367067		7.10606	7.29529	7.43457	7.32095	7.36368	7.31284	7.76405	7.88264	7.66921	7.76137	7.86465	7.74974	7.28379	7.28903	7.18295	7.26901	7.40027	6.84823	7.69587	7.91117	7.75378	7.74863	8.08193	7.67895
Top1mt	DNA topoisomerase 1, mitochondrial	15	75487465	75509230	-	ENSMUSG00000000934	2.13932	0.243363	0.159911	0.627441	0.602458	-0.0122109	0.0208072		7.6411	7.71032	7.55448	7.53978	7.52415	7.6062	8.23798	8.47573	8.26544	8.26966	8.13993	8.29723	7.71263	7.79326	7.87662	7.54522	7.53457	7.65558	8.02814	8.42575	8.22025	8.33359	8.40386	8.38606
Rhpn1	rhophilin, Rho GTPase binding protein 1	15	75534710	75544840	+	ENSMUSG00000022580	0.00745352	0.556121	0.932104	0.464954	0.0872191	0.0218599	0.0340958		7.46863	6.93272	7.12462	7.06288	7.38773	7.11615	6.87616	7.12928	6.84478	6.78801	7.21258	7.07483	7.47088	7.54468	7.24435	7.14468	7.3404	7.27609	7.19164	6.86632	7.24805	6.96337	6.77159	6.73017
Zc3h3	zinc finger CCCH type containing 3	15	75584877	75672338	-	ENSMUSG00000075600	3.57449	0.728061	0.0740238	0.404141	0.505911	-0.00591682	0.0433419		8.23954	8.47477	8.28321	8.36383	8.45186	8.43483	8.53557	8.76818	8.55443	8.29464	8.58015	8.72302	8.86134	8.663	8.55663	8.21073	8.44075	8.56965	8.17684	8.74767	8.78068	8.59722	8.73876	8.62583
Gsdmd	gasdermin D	15	75692769	75697834	+	ENSMUSG00000022575	4.71707	8.66632	0.0427305	0.00833395	0.647139	-0.0488527	-0.0668796	0.0638796	5.77675	4.94848	5.76034	5.36986	4.86118	5.4984	5.30461	5.20945	5.54522	5.07431	5.5345	5.63426	4.96186	4.99624	5.42492	5.02438	5.15819	5.26326	4.38428	5.46639	5.42408	5.26676	4.93509	5.11126
Naprt1	nicotinate phosphoribosyltransferase domain containing 1	15	75721394	75724911	-	ENSMUSG00000022574	1.13703	2.01789	0.299644	0.171659	0.460932	0.0538375	0.00569213	0.894716	6.01491	5.37912	5.52768	5.82052	5.51326	5.59461	6.65825	6.08746	6.1178	6.80549	6.16011	6.28634	5.72085	5.37476	5.92242	5.02438	5.58704	5.54337	6.91678	6.42575	6.53655	6.6376	6.68232	6.76334
Eef1d	eukaryotic translation elongation factor 1 delta (guanine nucleotide exchange protein)	15	75725226	75739986	-	ENSMUSG00000055762	3.44377	10.3926	0.0790706	0.0044695	0.563423	-0.0104445	-0.00297256	0.043666	10.1316	10.1865	10.1453	10.0814	10.2019	10.1931	10.4712	10.6582	10.5184	10.6436	10.5739	10.6952	10.1486	10.0428	10.1814	9.93127	10.1319	10.1407	10.2739	10.49	10.5534	10.5419	10.519	10.4726
Tigd5	tigger transposable element derived 5	15	75740221	75742136	+	ENSMUSG00000047166	3.78113	0.476119	0.066789	0.498528	0.127227	0.00183719	0.0153975		5.95078	6.00988	6.27184	6.01755	6.14129	6.03274	5.86261	6.22882	6.28218	5.33735	5.95981	6.19614	6.16831	6.10058	6.24435	6.05541	6.56628	6.07062	5.96924	6.34086	6.09727	6.36298	6.35655	6.18655
Pycrl	pyrroline-5-carboxylate reductase-like	15	75746893	75751990	-	ENSMUSG00000022571	7.50572	5.55528	0.0130236	0.029307	0.242406	-0.0030672	0.0219154	0.139178	7.68117	7.94062	7.96064	7.60252	8.09092	8.14026	8.59002	8.633	8.46927	8.26335	8.62439	8.8118	7.93385	8.01417	8.15124	7.81371	7.78867	7.79576	8.45344	8.51078	8.64925	8.60845	8.61155	8.51823
Tsta3	tissue specific transplantation antigen P35B	15	75755114	75760160	-	ENSMUSG00000022570	1.73978	4.03883	0.202844	0.0588829	0.184777	-0.0242614	-0.00882268	0.213549	8.07631	8.07597	8.01311	7.86384	8.15537	8.00674	8.17908	8.50383	8.20233	8.09579	8.30004	8.3347	7.97567	7.9317	8.04482	7.88453	7.9007	8.05582	8.01155	8.15444	8.11549	8.37457	8.12773	8.35919
Zfp623	zinc finger protein 623	15	75771382	75779807	+	ENSMUSG00000050846	0.0107731	0.0318983	0.918421	0.860142	0.191585	-0.00167102	0.0263857		7.93429	7.55421	7.90619	7.9224	8.00802	7.68481	7.72715	7.82655	7.7912	7.77918	7.95211	7.99683	8.04933	7.9317	8.03095	7.87586	7.66721	7.91534	7.71648	7.83562	7.75378	7.91658	7.81423	7.8585
Zfp707	zinc finger protein 707	15	75799553	75806298	+	ENSMUSG00000034429	0.216677	0.41892	0.646875	0.52522	0.4129	-0.0170731	-0.0116444		7.82227	7.75584	7.66519	7.48533	7.69768	7.67384	7.57763	7.93664	7.42974	7.63013	7.63404	7.44162	7.53755	7.663	7.77209	7.34631	7.71514	7.64573	7.29117	7.68017	7.58095	7.79249	7.61155	7.45365
